# Supplementary material
Source: publisher figshare collection journal article supplement (https://tandf.figshare.com/ndownloader/files/10621645)
Supplement: Supplementary file 1 [file 10621645]

## Sheet: Hypermethylated Marker CpGs
CpG.ID	ACC	BLCA	BRCA	CESC	CHOL	COAD	DLBC	ESCA	GBM	HNSC	KICH	KIRC	KIRP	LAML	LGG	LIHC	LUAD	LUSC	MESO	OV	PAAD	PCPG	PRAD	READ	SARC	SKCM	STAD	TGCT	THCA	THYM	UCEC	UCS	UVM	sums	chr	start	end	CpG.position.hg19	annotation	polycomb.locus	noncoding.RNA.gene
cg25594899	NA	0	0	0	0	0	NA	0	0	0	NA	0	0	NA	NA	0	0	0	NA	NA	0	0	1	0	0	0	0	NA	0	0	0	NA	NA	1	chr1	1182226	1182227	chr1:1182226-1182227	C1QTNF12,	1	0
cg16306898	NA	0	0	1	0	1	NA	1	0	1	NA	0	0	NA	NA	1	0	0	NA	NA	0	0	0	1	0	0	0	NA	0	0	0	NA	NA	6	chr1	1475675	1475676	chr1:1475675-1475676	TMEM240,	0	0
cg26067203	NA	0	0	0	0	0	NA	0	0	0	NA	0	0	NA	NA	0	0	0	NA	NA	0	0	1	0	0	0	0	NA	0	0	0	NA	NA	1	chr1	1935289	1935290	chr1:1935289-1935290	CFAP74,	0	0
cg22865720	NA	0	0	0	0	0	NA	0	1	0	NA	0	0	NA	NA	0	0	0	NA	NA	0	0	0	0	0	0	0	NA	0	0	0	NA	NA	1	chr1	1981816	1981817	chr1:1981816-1981817	LOC105378591, PRKCZ,	0	1
cg03315007	NA	0	0	0	0	0	NA	0	1	0	NA	0	0	NA	NA	0	0	0	NA	NA	0	0	0	0	0	0	0	NA	0	0	0	NA	NA	1	chr1	2137067	2137068	chr1:2137067-2137068	FAAP20,	1	0
cg00945293	NA	0	0	0	0	1	NA	0	0	0	NA	0	0	NA	NA	0	0	0	NA	NA	0	0	0	0	0	0	0	NA	0	0	0	NA	NA	1	chr1	2984869	2984870	chr1:2984869-2984870	LINC00982, PRDM16,	1	1
cg17741689	NA	0	0	1	0	0	NA	0	0	0	NA	0	0	NA	NA	0	0	0	NA	NA	0	0	0	0	0	0	0	NA	0	0	0	NA	NA	1	chr1	4714574	4714575	chr1:4714574-4714575	AJAP1,	1	0
cg02483484	NA	0	0	0	0	1	NA	0	0	0	NA	0	0	NA	NA	0	0	0	NA	NA	0	0	0	0	0	0	0	NA	0	0	0	NA	NA	1	chr1	4716537	4716538	chr1:4716537-4716538	AJAP1,	1	0
cg03397716	NA	0	0	0	0	0	NA	0	1	0	NA	0	0	NA	NA	0	0	0	NA	NA	0	0	0	0	0	0	0	NA	0	0	0	NA	NA	1	chr1	6484980	6484981	chr1:6484980-6484981	ESPN,	1	0
cg07113230	NA	0	0	0	0	0	NA	0	0	0	NA	0	0	NA	NA	0	0	1	NA	NA	0	0	0	0	0	0	0	NA	0	0	0	NA	NA	1	chr1	8277394	8277395	chr1:8277394-8277395	LINC01714,	0	1
cg05281894	NA	0	0	0	0	1	NA	0	0	0	NA	0	0	NA	NA	0	0	0	NA	NA	0	0	0	1	0	0	0	NA	0	0	0	NA	NA	2	chr1	13910698	13910699	chr1:13910698-13910699	PDPN,	0	0
cg25104105	NA	0	0	0	0	0	NA	0	0	0	NA	0	0	NA	NA	0	0	0	NA	NA	0	0	0	1	0	0	0	NA	0	0	0	NA	NA	1	chr1	14925198	14925199	chr1:14925198-14925199	KAZN,	1	0
cg04897742	NA	0	0	0	0	1	NA	0	0	0	NA	0	0	NA	NA	0	0	0	NA	NA	0	0	0	1	0	0	0	NA	0	0	0	NA	NA	2	chr1	16085148	16085149	chr1:16085148-16085149	FBLIM1,	1	0
cg21578219	NA	0	0	1	0	0	NA	0	0	0	NA	0	0	NA	NA	0	0	0	NA	NA	0	0	0	0	0	0	0	NA	0	0	0	NA	NA	1	chr1	18434542	18434543	chr1:18434542-18434543	IGSF21,	1	0
cg24690231	NA	0	0	1	0	0	NA	0	0	0	NA	0	0	NA	NA	0	0	0	NA	NA	0	0	0	0	0	0	0	NA	0	0	0	NA	NA	1	chr1	18437431	18437432	chr1:18437431-18437432	IGSF21,	1	0
cg00065215	NA	1	0	1	0	0	NA	0	0	1	NA	0	0	NA	NA	0	0	0	NA	NA	0	0	0	0	0	0	0	NA	0	0	1	NA	NA	4	chr1	18959268	18959269	chr1:18959268-18959269	PAX7,	1	0
cg24685601	NA	0	0	0	0	0	NA	0	0	0	NA	0	0	NA	NA	0	0	0	NA	NA	0	0	1	0	0	0	0	NA	0	0	0	NA	NA	1	chr1	20512550	20512551	chr1:20512550-20512551	UBXN10-AS1,	1	1
cg03754311	NA	0	0	0	0	1	NA	0	0	0	NA	0	0	NA	NA	0	0	0	NA	NA	0	0	0	0	0	0	0	NA	0	0	0	NA	NA	1	chr1	20879029	20879030	chr1:20879029-20879030	FAM43B,	1	0
cg15467646	NA	0	0	1	0	1	NA	0	0	0	NA	0	0	NA	NA	0	0	0	NA	NA	0	0	1	1	0	0	0	NA	0	0	0	NA	NA	4	chr1	22141014	22141015	chr1:22141014-22141015	LDLRAD2,	0	0
cg17716617	NA	0	0	0	0	1	NA	0	0	0	NA	0	0	NA	NA	0	0	0	NA	NA	0	0	0	1	0	0	0	NA	0	0	0	NA	NA	2	chr1	33219580	33219581	chr1:33219580-33219581	KIAA1522,	0	0
cg17418463	NA	0	0	0	0	1	NA	0	0	0	NA	0	0	NA	NA	0	0	0	NA	NA	0	0	0	1	0	0	0	NA	0	0	0	NA	NA	2	chr1	35395541	35395542	chr1:35395541-35395542	DLGAP3,	1	0
cg19206040	NA	0	0	1	0	0	NA	0	0	0	NA	0	0	NA	NA	0	0	0	NA	NA	0	0	0	0	0	0	0	NA	0	0	0	NA	NA	1	chr1	37500441	37500442	chr1:37500441-37500442	GRIK3,	1	0
cg08599259	NA	0	0	0	0	1	NA	0	0	0	NA	0	0	NA	NA	0	0	0	NA	NA	0	0	0	1	0	0	0	NA	0	0	0	NA	NA	2	chr1	38510933	38510934	chr1:38510933-38510934	POU3F1,	1	0
cg23048481	NA	0	0	0	0	1	NA	0	0	0	NA	0	0	NA	NA	0	0	0	NA	NA	0	0	0	0	0	0	0	NA	0	0	0	NA	NA	1	chr1	39044196	39044197	chr1:39044196-39044197	,	1	0
cg03741406	NA	0	0	0	0	0	NA	0	0	0	NA	0	0	NA	NA	0	0	0	NA	NA	0	0	1	0	0	0	0	NA	0	0	0	NA	NA	1	chr1	40255103	40255104	chr1:40255103-40255104	LOC101929536,	1	1
cg04023150	NA	0	0	1	1	0	NA	0	0	1	NA	0	0	NA	NA	0	0	0	NA	NA	0	0	0	0	0	0	0	NA	0	0	0	NA	NA	3	chr1	44873064	44873065	chr1:44873064-44873065	RNF220,	1	0
cg15576900	NA	0	0	0	0	0	NA	0	0	1	NA	0	0	NA	NA	0	0	1	NA	NA	0	0	0	0	0	0	0	NA	0	0	0	NA	NA	2	chr1	44883697	44883698	chr1:44883697-44883698	RNF220,	1	0
cg04108939	NA	0	0	0	0	0	NA	0	0	0	NA	0	0	NA	NA	0	0	0	NA	NA	0	0	1	0	0	0	0	NA	0	0	0	NA	NA	1	chr1	45250181	45250182	chr1:45250181-45250182	BEST4,	1	0
cg15071854	NA	0	0	0	0	0	NA	0	0	0	NA	0	0	NA	NA	0	0	0	NA	NA	0	0	1	0	0	0	0	NA	0	0	0	NA	NA	1	chr1	45792688	45792689	chr1:45792688-45792689	HPDL,	0	0
cg27636310	NA	0	0	0	0	0	NA	0	0	0	NA	0	0	NA	NA	0	0	0	NA	NA	0	0	1	0	0	0	0	NA	0	0	0	NA	NA	1	chr1	46632696	46632697	chr1:46632696-46632697	PIK3R3,	1	0
cg19807257	NA	0	0	0	0	1	NA	0	0	0	NA	0	0	NA	NA	0	0	0	NA	NA	0	0	0	1	0	0	0	NA	0	0	0	NA	NA	2	chr1	46951354	46951355	chr1:46951354-46951355	,	1	0
cg09326404	NA	0	0	1	0	0	NA	0	0	0	NA	0	0	NA	NA	0	0	0	NA	NA	0	0	0	0	0	0	0	NA	0	0	0	NA	NA	1	chr1	46956839	46956840	chr1:46956839-46956840	,	1	0
cg25764899	NA	0	1	0	1	0	NA	0	0	0	NA	0	0	NA	NA	0	1	0	NA	NA	0	0	0	0	0	0	0	NA	0	0	0	NA	NA	3	chr1	47697948	47697949	chr1:47697948-47697949	TAL1,	1	0
cg19809499	NA	0	0	0	0	0	NA	0	1	0	NA	0	0	NA	NA	0	0	0	NA	NA	0	0	0	0	0	0	0	NA	0	0	0	NA	NA	1	chr1	47882265	47882266	chr1:47882265-47882266	FOXE3, LINC01389,	1	1
cg04501188	NA	0	0	0	0	0	NA	0	1	0	NA	0	0	NA	NA	0	0	0	NA	NA	0	0	0	0	0	0	0	NA	0	0	0	NA	NA	1	chr1	47904171	47904172	chr1:47904171-47904172	FOXD2,	1	0
cg22524657	NA	0	0	0	0	0	NA	0	0	0	NA	0	0	NA	NA	1	1	0	NA	NA	0	0	1	0	0	0	0	NA	0	0	0	NA	NA	3	chr1	47999163	47999164	chr1:47999163-47999164	,	1	0
cg06744574	NA	0	0	0	0	0	NA	0	0	0	NA	0	0	NA	NA	0	0	0	NA	NA	0	0	0	1	0	0	0	NA	0	0	0	NA	NA	1	chr1	49242359	49242360	chr1:49242359-49242360	AGBL4, BEND5,	0	1
cg11666087	NA	0	0	0	0	1	NA	0	0	0	NA	0	0	NA	NA	0	0	0	NA	NA	0	0	0	0	0	0	0	NA	0	0	0	NA	NA	1	chr1	49242513	49242514	chr1:49242513-49242514	AGBL4, BEND5,	0	1
cg13368519	NA	0	0	0	0	0	NA	0	0	0	NA	0	0	NA	NA	0	0	1	NA	NA	0	0	0	0	0	0	0	NA	0	0	0	NA	NA	1	chr1	50893149	50893150	chr1:50893149-50893150	DMRTA2,	1	0
cg20950465	NA	0	0	0	0	0	NA	0	0	0	NA	0	0	NA	NA	0	0	0	NA	NA	0	0	1	0	0	0	0	NA	0	0	0	NA	NA	1	chr1	53068181	53068182	chr1:53068181-53068182	GPX7,	1	0
cg11279444	NA	0	0	0	0	1	NA	0	0	0	NA	0	0	NA	NA	0	0	0	NA	NA	0	0	0	0	0	0	1	NA	0	0	0	NA	NA	2	chr1	53099053	53099054	chr1:53099053-53099054	FAM159A,	1	1
cg19166660	NA	0	0	1	0	0	NA	0	0	0	NA	0	0	NA	NA	0	0	0	NA	NA	0	0	0	1	0	0	0	NA	0	0	0	NA	NA	2	chr1	57889035	57889036	chr1:57889035-57889036	DAB1,	1	0
cg03384825	NA	0	0	0	0	1	NA	0	0	0	NA	0	0	NA	NA	0	0	0	NA	NA	0	0	0	0	0	0	0	NA	0	0	0	NA	NA	1	chr1	57889604	57889605	chr1:57889604-57889605	DAB1,	1	0
cg04937080	NA	0	0	1	0	0	NA	0	0	0	NA	0	0	NA	NA	0	0	0	NA	NA	0	0	0	0	0	0	0	NA	0	0	0	NA	NA	1	chr1	58715532	58715533	chr1:58715532-58715533	DAB1,	1	0
cg13906377	NA	0	0	1	0	0	NA	0	0	1	NA	0	0	NA	NA	0	0	1	NA	NA	0	0	0	0	0	0	0	NA	0	0	0	NA	NA	3	chr1	63792695	63792696	chr1:63792695-63792696	FOXD3, FOXD3-AS1, MIR6068,	1	1
cg22724741	NA	0	0	0	0	0	NA	0	1	0	NA	0	0	NA	NA	0	0	0	NA	NA	0	0	0	0	0	0	0	NA	0	0	0	NA	NA	1	chr1	63793364	63793365	chr1:63793364-63793365	FOXD3, FOXD3-AS1, MIR6068,	1	1
cg10249375	NA	0	1	1	0	0	NA	0	0	0	NA	0	0	NA	NA	0	1	0	NA	NA	0	0	1	0	0	0	0	NA	0	0	1	NA	NA	5	chr1	63795934	63795935	chr1:63795934-63795935	MIR6068,	1	1
cg00455424	NA	0	0	0	0	0	NA	0	0	0	NA	0	0	NA	NA	0	0	0	NA	NA	0	0	1	0	0	0	0	NA	0	0	0	NA	NA	1	chr1	65468815	65468816	chr1:65468815-65468816	JAK1,	1	0
cg00466108	NA	0	0	0	0	0	NA	0	0	0	NA	0	0	NA	NA	0	0	0	NA	NA	0	0	1	0	0	0	0	NA	0	0	0	NA	NA	1	chr1	65731689	65731690	chr1:65731689-65731690	DNAJC6,	0	0
cg00046625	NA	0	0	1	0	0	NA	1	0	1	NA	0	0	NA	NA	0	0	0	NA	NA	0	0	0	0	0	0	0	NA	0	0	0	NA	NA	3	chr1	66258760	66258761	chr1:66258760-66258761	PDE4B,	1	0
cg14520424	NA	0	0	0	0	1	NA	0	0	0	NA	0	0	NA	NA	0	0	0	NA	NA	0	0	0	1	0	0	0	NA	0	0	0	NA	NA	2	chr1	70034491	70034492	chr1:70034491-70034492	LRRC7,	1	0
cg00338801	NA	0	0	0	0	0	NA	0	0	0	NA	0	0	NA	NA	0	0	0	NA	NA	0	0	1	0	0	1	0	NA	0	0	0	NA	NA	2	chr1	70035208	70035209	chr1:70035208-70035209	LRRC7,	1	0
cg25368122	NA	0	0	0	0	1	NA	0	0	0	NA	0	0	NA	NA	0	0	0	NA	NA	0	0	0	0	0	0	0	NA	0	0	0	NA	NA	1	chr1	75600685	75600686	chr1:75600685-75600686	LHX8,	1	0
cg19764599	NA	0	0	1	0	0	NA	0	0	0	NA	0	0	NA	NA	0	0	0	NA	NA	0	0	0	0	0	0	0	NA	0	0	0	NA	NA	1	chr1	75601276	75601277	chr1:75601276-75601277	LHX8,	1	0
cg07923233	NA	0	0	1	0	1	NA	0	0	0	NA	0	0	NA	NA	0	0	0	NA	NA	0	0	0	1	0	0	0	NA	0	0	0	NA	NA	3	chr1	76080727	76080728	chr1:76080727-76080728	SLC44A5,	1	0
cg21526205	NA	0	0	1	0	0	NA	0	0	0	NA	0	0	NA	NA	0	0	0	NA	NA	0	0	1	0	0	0	0	NA	0	0	0	NA	NA	2	chr1	76540574	76540575	chr1:76540574-76540575	ST6GALNAC3,	0	1
cg13463054	NA	0	0	1	0	1	NA	0	0	0	NA	0	0	NA	NA	0	0	0	NA	NA	0	0	0	1	0	0	0	NA	0	0	0	NA	NA	3	chr1	77333159	77333160	chr1:77333159-77333160	ST6GALNAC5,	1	0
cg18380175	NA	0	0	0	0	0	NA	0	0	1	NA	0	0	NA	NA	0	0	0	NA	NA	0	0	0	0	0	0	0	NA	0	0	0	NA	NA	1	chr1	77334070	77334071	chr1:77334070-77334071	ST6GALNAC5,	1	0
cg23241335	NA	0	0	1	0	0	NA	0	0	0	NA	0	0	NA	NA	0	0	0	NA	NA	0	0	0	0	0	0	0	NA	0	0	0	NA	NA	1	chr1	77747382	77747383	chr1:77747382-77747383	AK5,	1	0
cg04912843	NA	0	0	0	0	0	NA	0	0	0	NA	0	0	NA	NA	0	0	1	NA	NA	0	0	0	0	0	0	0	NA	0	0	0	NA	NA	1	chr1	78511856	78511857	chr1:78511856-78511857	GIPC2,	1	0
cg12644264	NA	0	0	0	0	1	NA	0	0	0	NA	0	0	NA	NA	0	0	0	NA	NA	0	0	0	1	0	0	0	NA	0	0	0	NA	NA	2	chr1	86622113	86622114	chr1:86622113-86622114	COL24A1,	1	1
cg03714573	NA	0	0	1	0	0	NA	0	0	0	NA	0	0	NA	NA	0	0	0	NA	NA	0	0	0	0	0	0	0	NA	0	0	0	NA	NA	1	chr1	91172770	91172771	chr1:91172770-91172771	BARHL2,	1	0
cg13939859	NA	0	0	1	0	0	NA	1	0	1	NA	0	0	NA	NA	0	0	0	NA	NA	0	0	0	1	0	0	0	NA	0	0	1	NA	NA	5	chr1	91183519	91183520	chr1:91183519-91183520	BARHL2,	1	0
cg14712186	NA	1	0	0	0	0	NA	0	0	0	NA	0	0	NA	NA	0	0	0	NA	NA	0	0	0	0	0	0	0	NA	0	0	0	NA	NA	1	chr1	91184413	91184414	chr1:91184413-91184414	BARHL2,	1	0
cg20463526	NA	0	0	1	0	0	NA	0	0	0	NA	0	0	NA	NA	0	0	0	NA	NA	0	0	0	0	0	0	0	NA	0	0	0	NA	NA	1	chr1	91191001	91191002	chr1:91191001-91191002	,	1	0
cg14995036	NA	0	0	0	0	0	NA	0	0	0	NA	0	0	NA	NA	0	0	0	NA	NA	0	0	1	0	0	0	0	NA	0	0	0	NA	NA	1	chr1	94146705	94146706	chr1:94146705-94146706	BCAR3,	0	0
cg00091285	NA	0	0	0	0	1	NA	0	0	0	NA	0	0	NA	NA	0	0	0	NA	NA	0	0	0	0	0	0	0	NA	0	0	0	NA	NA	1	chr1	98511031	98511032	chr1:98511031-98511032	MIR137HG,	1	1
cg03208936	NA	0	0	1	0	0	NA	0	0	0	NA	0	0	NA	NA	0	0	0	NA	NA	0	0	0	0	0	0	0	NA	0	0	0	NA	NA	1	chr1	98515087	98515088	chr1:98515087-98515088	MIR137HG,	1	1
cg09011883	NA	0	0	0	0	1	NA	0	0	0	NA	0	0	NA	NA	0	0	0	NA	NA	0	0	0	0	0	0	0	NA	0	0	0	NA	NA	1	chr1	98519661	98519662	chr1:98519661-98519662	MIR137HG,	0	1
cg19365673	NA	0	0	1	0	1	NA	0	0	0	NA	0	0	NA	NA	0	0	0	NA	NA	0	0	0	1	0	0	0	NA	0	0	0	NA	NA	3	chr1	99470618	99470619	chr1:99470618-99470619	LOC100129620,	0	1
cg03580297	NA	0	0	1	0	0	NA	0	0	0	NA	0	0	NA	NA	0	0	0	NA	NA	0	0	0	1	0	0	0	NA	0	0	0	NA	NA	2	chr1	99729804	99729805	chr1:99729804-99729805	PLPPR4,	1	0
cg14421860	NA	0	0	0	0	1	NA	0	0	0	NA	0	0	NA	NA	0	0	0	NA	NA	0	0	0	1	0	0	1	NA	0	0	0	NA	NA	3	chr1	101004934	101004935	chr1:101004934-101004935	GPR88,	1	0
cg18323466	NA	0	0	0	0	1	NA	0	0	0	NA	0	0	NA	NA	0	0	0	NA	NA	0	0	0	0	0	0	0	NA	0	0	0	NA	NA	1	chr1	101702602	101702603	chr1:101702602-101702603	S1PR1,	1	0
cg00066671	NA	0	0	1	0	0	NA	0	0	0	NA	0	0	NA	NA	0	0	0	NA	NA	0	0	0	0	0	0	0	NA	0	0	0	NA	NA	1	chr1	102462590	102462591	chr1:102462590-102462591	OLFM3,	0	1
cg26436330	NA	0	0	1	0	0	NA	0	0	0	NA	0	0	NA	NA	0	0	0	NA	NA	0	0	0	0	0	0	0	NA	0	0	0	NA	NA	1	chr1	103573700	103573701	chr1:103573700-103573701	COL11A1,	0	1
cg07155336	NA	0	0	0	0	0	NA	0	0	0	NA	0	0	NA	NA	0	0	0	NA	NA	0	0	0	0	0	0	1	NA	0	0	0	NA	NA	1	chr1	107683775	107683776	chr1:107683775-107683776	NTNG1,	0	0
cg05937496	NA	0	0	0	0	1	NA	0	0	0	NA	0	0	NA	NA	0	0	0	NA	NA	0	0	0	1	0	0	0	NA	0	0	0	NA	NA	2	chr1	108508207	108508208	chr1:108508207-108508208	VAV3-AS1,	1	1
cg06543087	NA	0	0	1	0	0	NA	0	0	0	NA	0	0	NA	NA	0	0	0	NA	NA	0	0	0	0	0	0	0	NA	0	0	0	NA	NA	1	chr1	108508548	108508549	chr1:108508548-108508549	VAV3-AS1,	1	1
cg01016662	NA	0	1	0	0	0	NA	0	0	0	NA	0	0	NA	NA	0	0	0	NA	NA	0	0	1	0	0	0	0	NA	0	0	0	NA	NA	2	chr1	110673082	110673083	chr1:110673082-110673083	,	1	0
cg13048512	NA	0	0	0	0	1	NA	0	0	0	NA	0	0	NA	NA	0	0	0	NA	NA	0	0	0	1	0	0	0	NA	0	0	0	NA	NA	2	chr1	110693612	110693613	chr1:110693612-110693613	SLC6A17,	1	0
cg01423964	NA	0	0	1	0	0	NA	0	0	0	NA	0	0	NA	NA	0	0	0	NA	NA	1	0	0	0	0	0	1	NA	0	0	0	NA	NA	3	chr1	111217575	111217576	chr1:111217575-111217576	KCNA3,	1	0
cg07808555	NA	1	0	0	0	0	NA	0	0	1	NA	0	0	NA	NA	0	0	0	NA	NA	0	0	0	0	0	0	0	NA	0	0	0	NA	NA	2	chr1	111217712	111217713	chr1:111217712-111217713	KCNA3,	1	1
cg12551029	NA	0	0	0	1	0	NA	0	0	0	NA	0	0	NA	NA	0	0	0	NA	NA	0	0	0	0	0	0	0	NA	0	0	0	NA	NA	1	chr1	113498106	113498107	chr1:113498106-113498107	SLC16A1,	0	0
cg27304110	NA	0	0	1	0	1	NA	0	0	0	NA	0	0	NA	NA	0	0	0	NA	NA	0	0	0	1	0	0	0	NA	0	0	0	NA	NA	3	chr1	114695695	114695696	chr1:114695695-114695696	SYT6,	1	0
cg19313043	NA	0	0	0	0	1	NA	0	0	0	NA	0	0	NA	NA	0	0	0	NA	NA	0	0	0	0	0	0	0	NA	0	0	0	NA	NA	1	chr1	115880207	115880208	chr1:115880207-115880208	NGF,	1	0
cg15654259	NA	0	0	0	0	0	NA	0	0	1	NA	0	0	NA	NA	0	0	0	NA	NA	0	0	1	0	0	0	0	NA	0	0	0	NA	NA	2	chr1	116371187	116371188	chr1:116371187-116371188	,	1	0
cg04550737	NA	1	0	0	0	1	NA	0	0	0	NA	0	0	NA	NA	0	0	0	NA	NA	0	0	0	1	0	0	0	NA	0	0	0	NA	NA	3	chr1	119530600	119530601	chr1:119530600-119530601	TBX15,	1	0
cg18948743	NA	0	0	0	0	0	NA	0	0	0	NA	0	0	NA	NA	0	0	0	NA	NA	0	0	0	1	0	0	0	NA	0	0	0	NA	NA	1	chr1	120838323	120838324	chr1:120838323-120838324	FAM72B,	0	0
cg07344025	NA	0	0	0	0	0	NA	0	0	0	NA	0	0	NA	NA	0	0	0	NA	NA	0	0	0	1	0	0	0	NA	0	0	0	NA	NA	1	chr1	143913418	143913419	chr1:143913418-143913419	FAM72C, FAM72D,	0	1
cg16277128	NA	0	0	0	0	0	NA	0	0	0	NA	0	0	NA	NA	0	0	0	NA	NA	0	0	1	0	0	0	0	NA	0	0	0	NA	NA	1	chr1	146556479	146556480	chr1:146556479-146556480	RNVU1-8,	1	1
cg07188591	NA	0	0	1	0	1	NA	0	0	0	NA	0	0	NA	NA	0	0	0	NA	NA	0	0	0	1	0	0	0	NA	0	0	0	NA	NA	3	chr1	148854315	148854316	chr1:148854315-148854316	NBPF25P,	0	1
cg24503056	NA	0	0	1	0	1	NA	0	0	0	NA	0	0	NA	NA	0	0	0	NA	NA	0	0	0	0	0	0	0	NA	0	0	0	NA	NA	2	chr1	149138268	149138269	chr1:149138268-149138269	,	1	0
cg24880024	NA	0	0	0	0	0	NA	0	1	0	NA	0	0	NA	NA	0	0	0	NA	NA	0	0	0	0	0	0	0	NA	0	0	0	NA	NA	1	chr1	152083709	152083710	chr1:152083709-152083710	TCHH,	1	0
cg25460143	NA	0	0	0	0	1	NA	0	0	0	NA	0	0	NA	NA	0	0	0	NA	NA	0	0	0	0	0	0	0	NA	0	0	0	NA	NA	1	chr1	154474800	154474801	chr1:154474800-154474801	TDRD10,	1	0
cg10445911	NA	0	0	0	0	0	NA	0	0	0	NA	0	0	NA	NA	0	0	0	NA	NA	0	0	1	0	0	0	0	NA	0	0	0	NA	NA	1	chr1	154971922	154971923	chr1:154971922-154971923	ZBTB7B,	0	1
cg12124922	NA	0	0	1	0	0	NA	0	0	0	NA	0	0	NA	NA	0	0	0	NA	NA	0	0	0	0	0	0	0	NA	0	0	0	NA	NA	1	chr1	158150649	158150650	chr1:158150649-158150650	CD1D,	1	0
cg04360049	NA	0	0	0	0	0	NA	0	0	0	NA	0	0	NA	NA	0	0	0	NA	NA	0	0	0	0	0	0	1	NA	0	0	0	NA	NA	1	chr1	158150797	158150798	chr1:158150797-158150798	CD1D,	1	0
cg22675486	NA	0	0	1	0	1	NA	0	0	0	NA	0	0	NA	NA	0	0	0	NA	NA	0	0	0	1	0	0	0	NA	0	0	0	NA	NA	3	chr1	165414544	165414545	chr1:165414544-165414545	RXRG,	1	1
cg21868774	NA	0	0	1	0	0	NA	0	0	0	NA	0	0	NA	NA	0	0	0	NA	NA	0	0	0	0	0	0	0	NA	0	0	0	NA	NA	1	chr1	166134282	166134283	chr1:166134282-166134283	FAM78B,	1	1
cg26248173	NA	0	1	1	0	0	NA	0	0	1	NA	0	0	NA	NA	0	0	0	NA	NA	0	0	0	0	0	0	0	NA	0	0	0	NA	NA	3	chr1	166853578	166853579	chr1:166853578-166853579	,	1	0
cg00100121	NA	0	1	0	0	1	NA	0	0	1	NA	0	0	NA	NA	0	0	0	NA	NA	0	0	1	1	0	0	0	NA	0	0	1	NA	NA	6	chr1	169396635	169396636	chr1:169396635-169396636	CCDC181,	0	0
cg00002719	NA	0	0	1	0	0	NA	0	0	0	NA	0	0	NA	NA	0	0	0	NA	NA	0	0	0	0	0	0	0	NA	0	0	0	NA	NA	1	chr1	169396706	169396707	chr1:169396706-169396707	CCDC181,	0	0
cg04123776	NA	0	0	1	0	1	NA	1	0	0	NA	0	0	NA	NA	0	0	1	NA	NA	0	0	0	1	0	0	0	NA	0	0	0	NA	NA	5	chr1	170630602	170630603	chr1:170630602-170630603	PRRX1,	1	0
cg04209911	NA	0	0	0	0	1	NA	0	0	0	NA	0	0	NA	NA	0	0	0	NA	NA	0	0	0	0	0	0	0	NA	0	0	0	NA	NA	1	chr1	177140145	177140146	chr1:177140145-177140146	BRINP2,	1	0
cg06515144	NA	0	0	1	0	0	NA	0	0	0	NA	0	0	NA	NA	0	0	0	NA	NA	0	0	0	0	0	0	0	NA	0	0	0	NA	NA	1	chr1	179545091	179545092	chr1:179545091-179545092	NPHS2,	1	0
cg20318608	NA	0	0	0	0	0	NA	0	0	0	NA	0	0	NA	NA	0	0	0	NA	NA	0	0	0	1	0	0	0	NA	0	0	0	NA	NA	1	chr1	179712591	179712592	chr1:179712591-179712592	FAM163A,	1	1
cg05719164	NA	0	0	1	0	0	NA	0	0	1	NA	0	0	NA	NA	0	0	0	NA	NA	0	0	0	0	0	0	0	NA	0	0	0	NA	NA	2	chr1	180204221	180204222	chr1:180204221-180204222	LHX4,	1	0
cg10316490	NA	0	0	1	0	0	NA	0	0	0	NA	0	0	NA	NA	0	0	0	NA	NA	0	0	0	0	0	0	0	NA	0	0	0	NA	NA	1	chr1	190445197	190445198	chr1:190445197-190445198	BRINP3,	1	0
cg23010538	NA	0	0	1	0	1	NA	0	0	1	NA	0	0	NA	NA	0	0	0	NA	NA	0	0	0	1	0	0	0	NA	0	0	0	NA	NA	4	chr1	190447290	190447291	chr1:190447290-190447291	BRINP3, LINC01351,	1	1
cg05391318	NA	0	0	1	0	0	NA	0	0	0	NA	0	0	NA	NA	0	0	0	NA	NA	0	0	0	0	0	0	0	NA	0	0	0	NA	NA	1	chr1	200011684	200011685	chr1:200011684-200011685	NR5A2,	1	0
cg13558971	NA	0	0	0	1	0	NA	0	0	0	NA	0	0	NA	NA	0	0	0	NA	NA	0	0	1	0	0	0	0	NA	0	0	0	NA	NA	2	chr1	203597085	203597086	chr1:203597085-203597086	ATP2B4,	1	0
cg12034118	NA	0	0	0	0	0	NA	0	1	0	NA	0	0	NA	NA	0	0	0	NA	NA	0	0	0	0	0	0	0	NA	0	0	0	NA	NA	1	chr1	209979487	209979488	chr1:209979487-209979488	IRF6,	0	0
cg17087479	NA	0	0	1	0	0	NA	0	0	0	NA	0	0	NA	NA	0	0	0	NA	NA	0	0	0	0	0	0	0	NA	0	0	0	NA	NA	1	chr1	214156255	214156256	chr1:214156255-214156256	PROX1-AS1,	1	1
cg27047243	NA	0	0	1	0	0	NA	0	0	0	NA	0	0	NA	NA	0	0	0	NA	NA	0	0	0	0	0	0	0	NA	0	0	0	NA	NA	1	chr1	214360753	214360754	chr1:214360753-214360754	,	1	0
cg20492807	NA	0	0	0	0	0	NA	0	1	0	NA	0	0	NA	NA	0	0	0	NA	NA	0	0	0	0	0	0	0	NA	0	0	0	NA	NA	1	chr1	225117750	225117751	chr1:225117750-225117751	DNAH14,	0	0
cg21535106	NA	0	0	0	0	0	NA	0	0	1	NA	0	0	NA	NA	0	0	0	NA	NA	0	0	0	0	0	0	0	NA	0	0	0	NA	NA	1	chr1	226288430	226288431	chr1:226288430-226288431	,	0	0
cg00655913	NA	0	0	0	0	0	NA	0	0	0	NA	0	0	NA	NA	0	0	0	NA	NA	0	0	1	0	0	0	0	NA	0	0	0	NA	NA	1	chr1	228633920	228633921	chr1:228633920-228633921	,	1	0
cg15104644	NA	0	0	1	0	0	NA	0	0	0	NA	0	0	NA	NA	0	0	0	NA	NA	0	0	0	0	0	0	0	NA	0	0	0	NA	NA	1	chr1	231297103	231297104	chr1:231297103-231297104	TRIM67,	1	0
cg27504802	NA	0	0	0	0	1	NA	0	0	0	NA	0	0	NA	NA	0	0	0	NA	NA	0	0	0	0	0	0	0	NA	0	0	0	NA	NA	1	chr1	231298651	231298652	chr1:231298651-231298652	TRIM67,	1	0
cg15542798	NA	0	0	0	0	0	NA	0	0	0	NA	0	0	NA	NA	0	0	0	NA	NA	0	0	0	0	0	0	0	NA	0	0	1	NA	NA	1	chr1	232941253	232941254	chr1:232941253-232941254	MAP10,	0	0
cg25437385	NA	0	0	0	0	1	NA	0	0	0	NA	0	0	NA	NA	0	0	0	NA	NA	0	0	0	1	0	0	0	NA	0	0	0	NA	NA	2	chr1	234040833	234040834	chr1:234040833-234040834	SLC35F3,	1	0
cg00662647	NA	0	0	0	0	1	NA	0	0	0	NA	0	0	NA	NA	0	0	0	NA	NA	0	0	0	0	0	0	0	NA	0	0	0	NA	NA	1	chr1	234350051	234350052	chr1:234350051-234350052	SLC35F3,	1	0
cg07790615	NA	0	1	1	1	0	NA	0	1	1	NA	0	0	NA	NA	0	0	0	NA	NA	0	0	0	0	0	0	0	NA	0	0	0	NA	NA	5	chr1	237205174	237205175	chr1:237205174-237205175	RYR2,	1	0
cg18375860	NA	0	0	0	0	0	NA	0	0	0	NA	0	0	NA	NA	0	0	0	NA	NA	1	0	0	0	0	0	0	NA	0	0	0	NA	NA	1	chr1	237205409	237205410	chr1:237205409-237205410	RYR2,	1	0
cg07914084	NA	0	0	0	0	1	NA	0	0	0	NA	0	0	NA	NA	0	0	0	NA	NA	0	0	0	0	0	0	0	NA	0	0	0	NA	NA	1	chr1	237205999	237206000	chr1:237205999-237206000	RYR2,	1	0
cg25208017	NA	0	0	1	0	0	NA	0	0	1	NA	0	0	NA	NA	0	0	0	NA	NA	1	0	0	0	0	0	0	NA	0	0	0	NA	NA	3	chr1	240255486	240255487	chr1:240255486-240255487	FMN2,	1	0
cg06353127	NA	0	0	1	0	0	NA	0	0	0	NA	0	0	NA	NA	0	0	0	NA	NA	0	0	0	0	0	0	0	NA	0	0	0	NA	NA	1	chr1	240775355	240775356	chr1:240775355-240775356	GREM2, MIR1273E,	1	1
cg15454726	NA	0	0	1	0	0	NA	0	0	0	NA	0	0	NA	NA	0	0	0	NA	NA	0	0	0	0	0	0	0	NA	0	0	0	NA	NA	1	chr1	241587609	241587610	chr1:241587609-241587610	,	0	0
cg27562682	NA	0	0	1	0	0	NA	0	0	0	NA	0	0	NA	NA	0	0	0	NA	NA	0	0	0	0	0	0	0	NA	0	0	0	NA	NA	1	chr1	243053865	243053866	chr1:243053865-243053866	,	0	0
cg20678442	NA	0	0	0	0	0	NA	0	0	0	NA	0	0	NA	NA	0	0	0	NA	NA	0	0	1	0	0	0	0	NA	0	0	0	NA	NA	1	chr1	244893503	244893504	chr1:244893503-244893504	,	1	0
cg02899206	NA	0	0	0	0	1	NA	0	0	0	NA	0	0	NA	NA	0	0	0	NA	NA	0	0	0	0	0	0	0	NA	0	0	0	NA	NA	1	chr10	1779835	1779836	chr10:1779835-1779836	ADARB2,	1	0
cg07198194	NA	0	0	0	0	0	NA	0	0	0	NA	0	0	NA	NA	0	0	0	NA	NA	0	0	1	0	0	0	0	NA	0	0	0	NA	NA	1	chr10	3109053	3109054	chr10:3109053-3109054	PFKP,	1	0
cg22862480	NA	0	0	0	0	1	NA	0	0	0	NA	0	0	NA	NA	0	0	0	NA	NA	0	0	0	1	0	0	1	NA	0	0	0	NA	NA	3	chr10	7450355	7450356	chr10:7450355-7450356	SFMBT2,	1	0
cg04711998	NA	0	0	1	0	0	NA	0	0	0	NA	0	0	NA	NA	0	0	0	NA	NA	0	0	0	0	0	0	0	NA	0	0	0	NA	NA	1	chr10	7708869	7708870	chr10:7708869-7708870	ITIH5,	1	0
cg14649650	NA	0	0	0	0	1	NA	0	0	0	NA	0	0	NA	NA	0	0	0	NA	NA	0	0	0	1	0	0	0	NA	0	0	0	NA	NA	2	chr10	13933996	13933997	chr10:13933996-13933997	FRMD4A,	1	0
cg19944763	NA	0	0	1	0	0	NA	1	0	1	NA	0	0	NA	NA	0	0	0	NA	NA	0	0	0	1	0	0	0	NA	0	0	0	NA	NA	4	chr10	15761854	15761855	chr10:15761854-15761855	ITGA8,	1	0
cg24037897	NA	0	0	0	0	1	NA	0	0	0	NA	0	0	NA	NA	0	0	0	NA	NA	0	0	0	1	0	0	0	NA	0	0	0	NA	NA	2	chr10	16562626	16562627	chr10:16562626-16562627	C1QL3,	1	0
cg23991622	NA	0	0	0	0	1	NA	0	0	0	NA	0	0	NA	NA	0	0	0	NA	NA	0	0	0	1	0	0	0	NA	0	0	0	NA	NA	2	chr10	17271303	17271304	chr10:17271303-17271304	VIM, VIM-AS1,	1	1
cg12874092	NA	1	0	0	0	0	NA	0	0	0	NA	0	0	NA	NA	0	0	0	NA	NA	0	0	0	0	0	0	1	NA	0	0	0	NA	NA	2	chr10	17271519	17271520	chr10:17271519-17271520	VIM, VIM-AS1,	1	1
cg01805540	NA	0	0	1	0	0	NA	0	0	0	NA	0	0	NA	NA	0	0	0	NA	NA	0	0	0	0	0	0	0	NA	0	0	0	NA	NA	1	chr10	18429749	18429750	chr10:18429749-18429750	CACNB2,	1	0
cg05099508	NA	1	1	1	1	1	NA	0	0	1	NA	0	0	NA	NA	0	0	0	NA	NA	0	0	0	0	0	0	0	NA	0	0	1	NA	NA	7	chr10	22634432	22634433	chr10:22634432-22634433	SPAG6,	1	0
cg24031355	NA	0	0	0	0	0	NA	0	0	0	NA	0	0	NA	NA	0	0	0	NA	NA	0	0	0	1	0	0	0	NA	0	0	0	NA	NA	1	chr10	22634439	22634440	chr10:22634439-22634440	SPAG6,	1	0
cg08839858	NA	0	0	0	0	1	NA	0	0	0	NA	0	0	NA	NA	0	0	0	NA	NA	0	0	0	1	0	0	0	NA	0	0	0	NA	NA	2	chr10	23216843	23216844	chr10:23216843-23216844	ARMC3,	1	0
cg00530925	NA	0	0	1	0	0	NA	1	0	0	NA	0	0	NA	NA	0	0	0	NA	NA	0	0	0	0	0	0	0	NA	0	0	0	NA	NA	2	chr10	23463094	23463095	chr10:23463094-23463095	,	1	0
cg20014049	NA	0	0	1	0	0	NA	0	0	0	NA	0	0	NA	NA	0	0	0	NA	NA	0	0	0	0	0	0	0	NA	0	0	0	NA	NA	1	chr10	23481385	23481386	chr10:23481385-23481386	PTF1A,	1	0
cg24767148	NA	0	0	0	0	0	NA	0	0	1	NA	0	0	NA	NA	0	0	0	NA	NA	0	0	0	0	0	0	0	NA	0	0	0	NA	NA	1	chr10	23481786	23481787	chr10:23481786-23481787	PTF1A,	1	0
cg24487076	NA	0	0	0	0	1	NA	0	0	0	NA	0	0	NA	NA	0	0	0	NA	NA	0	0	0	1	0	0	0	NA	0	0	0	NA	NA	2	chr10	23983496	23983497	chr10:23983496-23983497	KIAA1217,	1	0
cg03650342	NA	0	0	1	0	0	NA	0	0	0	NA	0	0	NA	NA	0	0	0	NA	NA	0	0	0	0	0	0	0	NA	0	0	0	NA	NA	1	chr10	25465350	25465351	chr10:25465350-25465351	GPR158,	1	0
cg08441170	NA	0	0	0	0	0	NA	0	0	0	NA	0	0	NA	NA	0	0	0	NA	NA	0	0	0	0	0	0	0	NA	0	0	1	NA	NA	1	chr10	26223100	26223101	chr10:26223100-26223101	MYO3A,	0	0
cg09056181	NA	0	0	0	0	0	NA	0	0	0	NA	0	0	NA	NA	0	0	0	NA	NA	0	0	0	0	0	0	0	NA	0	0	1	NA	NA	1	chr10	26505503	26505504	chr10:26505503-26505504	GAD2,	1	0
cg03476087	NA	0	0	1	0	0	NA	0	0	0	NA	0	0	NA	NA	0	0	0	NA	NA	0	0	0	0	0	0	0	NA	0	0	0	NA	NA	1	chr10	26506353	26506354	chr10:26506353-26506354	GAD2,	1	0
cg14965220	NA	0	0	0	0	1	NA	0	0	0	NA	0	0	NA	NA	0	0	0	NA	NA	0	0	0	0	0	0	0	NA	0	0	0	NA	NA	1	chr10	28034091	28034092	chr10:28034091-28034092	MKX, MKX-AS1,	1	1
cg25964032	NA	0	0	0	0	1	NA	0	0	0	NA	0	0	NA	NA	0	0	0	NA	NA	0	0	0	0	0	0	0	NA	0	0	0	NA	NA	1	chr10	35929326	35929327	chr10:35929326-35929327	FZD8,	1	0
cg04963514	NA	0	0	0	0	0	NA	0	0	0	NA	0	0	NA	NA	0	0	0	NA	NA	0	0	1	0	0	0	0	NA	0	0	0	NA	NA	1	chr10	44162879	44162880	chr10:44162879-44162880	ZNF32-AS3,	1	1
cg17267805	NA	0	0	1	0	0	NA	0	0	0	NA	0	0	NA	NA	0	0	0	NA	NA	0	0	0	0	0	0	0	NA	0	0	0	NA	NA	1	chr10	44880545	44880546	chr10:44880545-44880546	CXCL12,	1	0
cg04194494	NA	0	0	0	0	0	NA	0	0	0	NA	0	0	NA	NA	0	0	0	NA	NA	0	0	1	0	0	0	0	NA	0	0	0	NA	NA	1	chr10	45914450	45914451	chr10:45914450-45914451	ALOX5,	0	0
cg04110601	NA	0	0	1	0	0	NA	0	0	0	NA	0	0	NA	NA	0	0	0	NA	NA	0	0	0	0	0	0	0	NA	0	0	0	NA	NA	1	chr10	48438724	48438725	chr10:48438724-48438725	GDF10,	1	0
cg24385334	NA	0	0	0	0	0	NA	0	0	0	NA	0	0	NA	NA	0	0	0	NA	NA	0	0	0	1	0	0	0	NA	0	0	0	NA	NA	1	chr10	49732315	49732316	chr10:49732315-49732316	ARHGAP22,	0	1
cg23987444	NA	0	0	1	0	0	NA	0	0	0	NA	0	0	NA	NA	0	0	0	NA	NA	0	0	0	1	0	0	0	NA	0	0	0	NA	NA	2	chr10	50817810	50817811	chr10:50817810-50817811	CHAT,	1	0
cg14526047	NA	0	0	1	0	0	NA	0	0	0	NA	0	0	NA	NA	0	0	0	NA	NA	0	0	0	0	0	0	0	NA	0	0	0	NA	NA	1	chr10	50887616	50887617	chr10:50887616-50887617	C10orf53,	1	0
cg26293182	NA	0	0	1	0	1	NA	0	0	0	NA	0	0	NA	NA	0	0	0	NA	NA	0	0	0	1	0	0	0	NA	0	0	1	NA	NA	4	chr10	57389779	57389780	chr10:57389779-57389780	,	1	0
cg06419761	NA	0	0	0	0	1	NA	0	0	0	NA	0	0	NA	NA	0	0	0	NA	NA	0	0	0	1	0	0	0	NA	0	0	0	NA	NA	2	chr10	72043661	72043662	chr10:72043661-72043662	NPFFR1,	1	0
cg12799885	NA	0	0	0	0	0	NA	0	0	0	NA	0	0	NA	NA	0	0	0	NA	NA	0	0	1	0	0	0	0	NA	0	0	0	NA	NA	1	chr10	74020976	74020977	chr10:74020976-74020977	,	0	0
cg22928016	NA	0	0	1	0	0	NA	0	0	0	NA	0	0	NA	NA	0	0	0	NA	NA	0	0	0	0	0	0	0	NA	0	0	0	NA	NA	1	chr10	83636249	83636250	chr10:83636249-83636250	NRG3,	1	0
cg01229798	NA	0	0	0	0	1	NA	0	0	0	NA	0	0	NA	NA	0	0	0	NA	NA	0	0	0	0	0	0	0	NA	0	0	0	NA	NA	1	chr10	88126853	88126854	chr10:88126853-88126854	GRID1,	1	0
cg25452974	NA	0	0	0	0	0	NA	0	0	0	NA	0	0	NA	NA	0	0	0	NA	NA	0	0	0	0	0	1	0	NA	0	0	0	NA	NA	1	chr10	89621984	89621985	chr10:89621984-89621985	KLLN,	0	0
cg11832210	NA	0	0	0	0	1	NA	0	0	0	NA	0	0	NA	NA	0	0	0	NA	NA	0	0	0	1	0	0	0	NA	0	0	0	NA	NA	2	chr10	91295346	91295347	chr10:91295346-91295347	SLC16A12,	1	0
cg18484034	NA	0	0	0	0	0	NA	0	0	0	NA	0	0	NA	NA	0	0	0	NA	NA	0	0	1	0	0	0	0	NA	0	0	0	NA	NA	1	chr10	93647648	93647649	chr10:93647648-93647649	,	0	0
cg10914555	NA	0	0	0	0	1	NA	0	0	0	NA	0	0	NA	NA	0	0	0	NA	NA	0	0	0	0	0	0	0	NA	0	0	0	NA	NA	1	chr10	99531645	99531646	chr10:99531645-99531646	SFRP5,	1	0
cg07834955	NA	0	0	0	0	0	NA	0	0	0	NA	0	0	NA	NA	0	0	0	NA	NA	0	0	1	0	0	0	0	NA	0	0	0	NA	NA	1	chr10	99531879	99531880	chr10:99531879-99531880	SFRP5,	1	0
cg13690864	NA	0	0	0	0	1	NA	0	0	0	NA	0	0	NA	NA	0	0	0	NA	NA	0	0	0	0	0	0	0	NA	0	0	0	NA	NA	1	chr10	100993938	100993939	chr10:100993938-100993939	HPSE2,	1	0
cg10377903	NA	0	0	0	0	0	NA	0	0	0	NA	0	0	NA	NA	0	0	0	NA	NA	0	0	1	0	0	0	0	NA	0	0	0	NA	NA	1	chr10	101290699	101290700	chr10:101290699-101290700	LINC01475,	1	1
cg14506196	NA	0	0	0	0	0	NA	0	1	0	NA	0	0	NA	NA	0	0	0	NA	NA	0	0	0	0	0	0	0	NA	0	0	0	NA	NA	1	chr10	101295400	101295401	chr10:101295400-101295401	NKX2-3,	1	0
cg09227150	NA	0	0	0	0	0	NA	0	0	0	NA	0	0	NA	NA	0	0	0	NA	NA	0	0	0	0	0	1	0	NA	0	0	0	NA	NA	1	chr10	102475578	102475579	chr10:102475578-102475579	,	1	0
cg22898797	NA	0	0	1	0	1	NA	0	0	0	NA	0	0	NA	NA	0	0	0	NA	NA	0	0	0	0	0	0	0	NA	0	0	0	NA	NA	2	chr10	102484232	102484233	chr10:102484232-102484233	,	1	0
cg22964842	NA	0	0	0	0	0	NA	0	0	0	NA	0	0	NA	NA	0	0	0	NA	NA	0	0	1	0	0	0	0	NA	0	0	0	NA	NA	1	chr10	102495141	102495142	chr10:102495141-102495142	PAX2,	1	0
cg05336698	NA	0	0	1	0	1	NA	1	0	0	NA	0	0	NA	NA	0	0	0	NA	NA	0	0	0	0	0	0	0	NA	0	0	0	NA	NA	3	chr10	102497298	102497299	chr10:102497298-102497299	PAX2,	1	0
cg26582768	NA	0	0	0	0	0	NA	0	0	0	NA	0	0	NA	NA	0	0	0	NA	NA	0	0	1	0	0	0	0	NA	0	0	0	NA	NA	1	chr10	102792043	102792044	chr10:102792043-102792044	SFXN3,	1	0
cg25741023	NA	0	0	1	0	0	NA	0	0	0	NA	0	0	NA	NA	0	0	0	NA	NA	0	0	0	0	0	0	0	NA	0	0	0	NA	NA	1	chr10	102891019	102891020	chr10:102891019-102891020	TLX1NB,	1	1
cg24770596	NA	0	0	0	0	1	NA	0	0	0	NA	0	0	NA	NA	0	0	0	NA	NA	0	0	0	0	0	0	0	NA	0	0	0	NA	NA	1	chr10	104170513	104170514	chr10:104170513-104170514	PSD,	1	0
cg17567560	NA	0	0	0	0	1	NA	0	0	0	NA	0	0	NA	NA	0	0	0	NA	NA	0	0	0	0	0	0	0	NA	0	0	0	NA	NA	1	chr10	105036863	105036864	chr10:105036863-105036864	INA,	1	0
cg08768569	NA	0	0	0	0	1	NA	0	0	0	NA	0	0	NA	NA	0	0	0	NA	NA	0	0	0	1	0	0	0	NA	0	0	0	NA	NA	2	chr10	106400565	106400566	chr10:106400565-106400566	SORCS3,	1	0
cg10601616	NA	0	0	1	0	0	NA	0	0	0	NA	0	0	NA	NA	0	0	0	NA	NA	0	0	0	0	0	0	0	NA	0	0	1	NA	NA	2	chr10	106400702	106400703	chr10:106400702-106400703	SORCS3,	1	0
cg24403845	NA	0	0	1	0	1	NA	1	0	1	NA	0	0	NA	NA	0	0	0	NA	NA	0	0	0	1	0	0	0	NA	0	0	1	NA	NA	6	chr10	108924366	108924367	chr10:108924366-108924367	SORCS1,	1	0
cg26526374	NA	0	0	1	0	0	NA	0	0	0	NA	0	0	NA	NA	0	0	0	NA	NA	0	0	0	0	0	0	0	NA	0	0	1	NA	NA	2	chr10	109674854	109674855	chr10:109674854-109674855	LINC01435,	0	1
cg06298519	NA	0	0	1	0	1	NA	0	0	0	NA	0	0	NA	NA	0	0	0	NA	NA	0	0	0	1	0	0	0	NA	0	0	0	NA	NA	3	chr10	118031864	118031865	chr10:118031864-118031865	GFRA1,	1	0
cg13457172	NA	0	0	1	0	0	NA	0	0	1	NA	0	0	NA	NA	0	0	0	NA	NA	0	0	0	0	0	0	0	NA	0	0	0	NA	NA	2	chr10	118897847	118897848	chr10:118897847-118897848	VAX1,	1	0
cg08701047	NA	0	0	1	0	1	NA	0	0	1	NA	0	0	NA	NA	0	0	0	NA	NA	0	0	0	0	0	0	0	NA	0	0	0	NA	NA	3	chr10	130085199	130085200	chr10:130085199-130085200	LINC01163,	1	1
cg20099104	NA	0	0	1	0	0	NA	0	0	1	NA	0	0	NA	NA	0	0	0	NA	NA	0	0	0	0	0	0	0	NA	0	0	0	NA	NA	2	chr10	130339669	130339670	chr10:130339669-130339670	,	1	0
cg12824796	NA	0	0	1	1	1	NA	0	0	1	NA	0	0	NA	NA	0	0	0	NA	NA	0	0	0	0	0	0	0	NA	0	0	0	NA	NA	4	chr10	131768928	131768929	chr10:131768928-131768929	,	1	0
cg08753373	NA	0	0	1	0	1	NA	0	0	0	NA	0	0	NA	NA	0	0	0	NA	NA	0	0	0	0	0	0	0	NA	0	0	0	NA	NA	2	chr10	134000124	134000125	chr10:134000124-134000125	DPYSL4, JAKMIP3,	1	0
cg09639725	NA	0	0	0	0	1	NA	0	0	0	NA	0	0	NA	NA	0	0	0	NA	NA	0	0	0	0	0	0	0	NA	0	0	0	NA	NA	1	chr10	134901294	134901295	chr10:134901294-134901295	ADGRA1, ADGRA1-AS1,	1	1
cg19580752	NA	0	0	1	0	0	NA	0	0	0	NA	0	0	NA	NA	0	0	0	NA	NA	0	0	0	0	0	0	0	NA	0	0	0	NA	NA	1	chr10	135050355	135050356	chr10:135050355-135050356	VENTX,	1	0
cg22074576	NA	0	0	0	0	0	NA	0	0	0	NA	0	0	NA	NA	0	0	0	NA	NA	0	0	1	0	0	0	0	NA	0	0	0	NA	NA	1	chr11	3181726	3181727	chr11:3181726-3181727	OSBPL5,	1	0
cg18560328	NA	0	0	1	0	1	NA	0	0	0	NA	0	0	NA	NA	0	0	0	NA	NA	0	0	0	1	0	0	0	NA	0	0	0	NA	NA	3	chr11	7273148	7273149	chr11:7273148-7273149	SYT9,	1	0
cg15344220	NA	0	0	0	0	1	NA	0	0	0	NA	0	0	NA	NA	0	0	0	NA	NA	0	0	0	0	0	0	0	NA	0	0	0	NA	NA	1	chr11	8040551	8040552	chr11:8040551-8040552	CASC23,	1	1
cg26121782	NA	0	0	0	0	1	NA	0	0	0	NA	0	0	NA	NA	0	0	0	NA	NA	0	0	0	1	0	0	0	NA	0	0	0	NA	NA	2	chr11	8284312	8284313	chr11:8284312-8284313	LMO1,	1	1
cg12740527	NA	0	0	0	0	1	NA	0	0	0	NA	0	0	NA	NA	0	0	0	NA	NA	0	0	0	1	0	0	0	NA	0	0	0	NA	NA	2	chr11	8289974	8289975	chr11:8289974-8289975	LMO1,	1	0
cg17039391	NA	0	0	0	0	1	NA	0	0	0	NA	0	0	NA	NA	0	0	0	NA	NA	0	0	0	0	0	0	0	NA	0	0	0	NA	NA	1	chr11	12030272	12030273	chr11:12030272-12030273	DKK3,	1	0
cg26676559	NA	0	0	1	0	0	NA	0	0	1	NA	0	0	NA	NA	0	0	0	NA	NA	0	0	0	0	0	0	1	NA	0	0	0	NA	NA	3	chr11	14995167	14995168	chr11:14995167-14995168	CALCA,	1	1
cg02907374	NA	0	0	1	0	0	NA	0	0	0	NA	0	0	NA	NA	0	0	0	NA	NA	0	0	0	0	0	0	0	NA	0	0	0	NA	NA	1	chr11	15095028	15095029	chr11:15095028-15095029	CALCB,	1	0
cg02434443	NA	0	0	1	0	0	NA	0	0	0	NA	0	0	NA	NA	0	0	0	NA	NA	0	0	0	0	0	0	0	NA	0	0	0	NA	NA	1	chr11	15136456	15136457	chr11:15136456-15136457	INSC,	1	0
cg15442988	NA	0	0	0	0	1	NA	0	0	0	NA	0	0	NA	NA	0	0	0	NA	NA	0	0	0	0	0	0	0	NA	0	0	0	NA	NA	1	chr11	19367937	19367938	chr11:19367937-19367938	NAV2,	1	0
cg14689623	NA	0	0	1	0	0	NA	0	0	0	NA	0	0	NA	NA	0	0	0	NA	NA	0	0	0	0	0	0	0	NA	0	0	0	NA	NA	1	chr11	20691161	20691162	chr11:20691161-20691162	NELL1,	1	0
cg01563031	NA	0	0	0	0	1	NA	0	0	0	NA	0	0	NA	NA	0	0	0	NA	NA	0	0	0	1	0	0	0	NA	0	0	0	NA	NA	2	chr11	20691429	20691430	chr11:20691429-20691430	NELL1,	1	0
cg10022526	NA	0	0	1	0	0	NA	0	0	0	NA	0	0	NA	NA	0	0	0	NA	NA	0	0	0	0	0	0	0	NA	0	0	0	NA	NA	1	chr11	27744557	27744558	chr11:27744557-27744558	BDNF,	1	0
cg10566121	NA	0	0	0	0	1	NA	0	0	0	NA	0	0	NA	NA	0	0	0	NA	NA	0	0	0	1	0	0	0	NA	0	0	0	NA	NA	2	chr11	30606026	30606027	chr11:30606026-30606027	MPPED2,	1	0
cg16616521	NA	0	0	1	0	0	NA	1	1	1	NA	0	0	NA	NA	0	0	1	NA	NA	0	0	0	1	0	0	0	NA	0	0	1	NA	NA	7	chr11	31821388	31821389	chr11:31821388-31821389	PAX6,	1	0
cg19074340	NA	0	0	1	0	0	NA	0	0	0	NA	0	0	NA	NA	0	0	0	NA	NA	0	0	0	0	0	0	0	NA	0	0	0	NA	NA	1	chr11	32456912	32456913	chr11:32456912-32456913	WT1,	1	0
cg20143092	NA	0	0	0	0	0	NA	0	0	0	NA	0	0	NA	NA	0	0	0	NA	NA	0	0	1	0	0	0	0	NA	0	0	0	NA	NA	1	chr11	35160330	35160331	chr11:35160330-35160331	CD44, LOC100507144,	1	1
cg23083315	NA	0	0	0	0	0	NA	0	0	0	NA	0	0	NA	NA	0	0	0	NA	NA	0	0	1	0	0	0	0	NA	0	0	0	NA	NA	1	chr11	35639656	35639657	chr11:35639656-35639657	FJX1,	1	0
cg14416371	NA	0	1	1	0	0	NA	1	0	1	NA	0	0	NA	NA	0	1	0	NA	NA	1	0	0	0	0	0	0	NA	0	0	0	NA	NA	6	chr11	43602847	43602848	chr11:43602847-43602848	MIR129-2,	1	1
cg08408994	NA	0	0	0	0	1	NA	0	0	0	NA	0	0	NA	NA	0	0	0	NA	NA	0	0	0	1	0	0	0	NA	0	0	0	NA	NA	2	chr11	44330958	44330959	chr11:44330958-44330959	ALX4,	1	0
cg04067139	NA	0	0	1	0	0	NA	0	0	0	NA	0	0	NA	NA	0	0	0	NA	NA	0	0	0	0	0	0	0	NA	0	0	0	NA	NA	1	chr11	58673167	58673168	chr11:58673167-58673168	,	1	0
cg26437112	NA	0	0	1	0	0	NA	0	0	0	NA	0	0	NA	NA	0	0	0	NA	NA	0	0	0	0	0	0	0	NA	0	0	0	NA	NA	1	chr11	58869855	58869856	chr11:58869855-58869856	FAM111B,	0	0
cg05415131	NA	0	0	0	0	0	NA	0	0	0	NA	0	0	NA	NA	0	0	0	NA	NA	0	0	1	0	0	0	0	NA	0	0	0	NA	NA	1	chr11	58940866	58940867	chr11:58940866-58940867	DTX4,	0	0
cg09952395	NA	0	0	0	0	0	NA	0	0	0	NA	0	0	NA	NA	0	0	0	NA	NA	0	0	1	0	0	0	0	NA	0	0	0	NA	NA	1	chr11	63258712	63258713	chr11:63258712-63258713	HRASLS5,	0	0
cg05758094	NA	0	0	0	0	1	NA	0	0	0	NA	0	0	NA	NA	0	0	0	NA	NA	0	0	0	1	0	0	0	NA	0	0	0	NA	NA	2	chr11	65600846	65600847	chr11:65600846-65600847	SNX32,	1	0
cg02659086	NA	0	0	0	0	0	NA	0	0	0	NA	0	0	NA	NA	0	0	0	NA	NA	0	0	1	0	0	0	0	NA	0	0	0	NA	NA	1	chr11	67350976	67350977	chr11:67350976-67350977	GSTP1,	0	0
cg21052682	NA	0	0	0	0	0	NA	0	0	0	NA	0	0	NA	NA	1	0	0	NA	NA	0	0	0	0	0	0	0	NA	0	0	0	NA	NA	1	chr11	69518197	69518198	chr11:69518197-69518198	FGF19,	1	0
cg23964057	NA	0	0	0	0	1	NA	0	0	0	NA	0	0	NA	NA	0	0	0	NA	NA	0	0	0	0	0	0	0	NA	0	0	0	NA	NA	1	chr11	69590113	69590114	chr11:69590113-69590114	FGF4,	1	0
cg24530250	NA	0	0	1	0	0	NA	0	0	0	NA	0	0	NA	NA	0	0	0	NA	NA	0	0	1	0	0	0	0	NA	0	0	1	NA	NA	3	chr11	71955599	71955600	chr11:71955599-71955600	PHOX2A,	1	0
cg11968091	NA	0	0	0	0	1	NA	0	0	0	NA	0	0	NA	NA	0	0	0	NA	NA	0	0	0	0	0	0	0	NA	0	0	0	NA	NA	1	chr11	79149860	79149861	chr11:79149860-79149861	TENM4,	1	0
cg07434402	NA	0	0	1	0	0	NA	0	0	0	NA	0	0	NA	NA	0	0	0	NA	NA	0	0	0	0	0	0	0	NA	0	0	0	NA	NA	1	chr11	84431535	84431536	chr11:84431535-84431536	DLG2,	0	0
cg18854419	NA	0	0	0	0	0	NA	0	0	0	NA	0	0	NA	NA	0	0	0	NA	NA	0	0	0	1	0	0	0	NA	0	0	0	NA	NA	1	chr11	91957989	91957990	chr11:91957989-91957990	,	1	0
cg22782191	NA	0	0	0	0	0	NA	0	0	0	NA	0	0	NA	NA	0	0	0	NA	NA	0	0	0	1	0	0	0	NA	0	0	0	NA	NA	1	chr11	94473671	94473672	chr11:94473671-94473672	LOC105369438,	1	1
cg02120582	NA	0	0	0	0	1	NA	0	0	0	NA	0	0	NA	NA	0	0	0	NA	NA	0	0	0	0	0	0	0	NA	0	0	0	NA	NA	1	chr11	104034754	104034755	chr11:104034754-104034755	PDGFD,	0	0
cg03225817	NA	0	0	1	0	0	NA	0	0	0	NA	0	0	NA	NA	0	0	0	NA	NA	0	0	0	0	0	0	0	NA	0	0	0	NA	NA	1	chr11	105481317	105481318	chr11:105481317-105481318	GRIA4,	1	0
cg04747226	NA	0	0	0	0	1	NA	0	0	0	NA	0	0	NA	NA	0	0	0	NA	NA	0	0	0	1	0	0	0	NA	0	0	1	NA	NA	3	chr11	105481319	105481320	chr11:105481319-105481320	GRIA4,	1	0
cg07972135	NA	0	0	0	0	0	NA	0	0	1	NA	0	0	NA	NA	0	0	0	NA	NA	0	0	0	0	0	0	0	NA	0	0	0	NA	NA	1	chr11	105481322	105481323	chr11:105481322-105481323	GRIA4,	1	0
cg26210187	NA	0	0	0	0	1	NA	0	0	0	NA	0	0	NA	NA	0	0	0	NA	NA	0	0	0	1	0	0	0	NA	0	0	0	NA	NA	2	chr11	110582420	110582421	chr11:110582420-110582421	ARHGAP20,	1	0
cg22879515	NA	0	0	0	0	1	NA	0	0	0	NA	0	0	NA	NA	0	0	0	NA	NA	0	0	0	1	0	0	0	NA	0	0	0	NA	NA	2	chr11	111383515	111383516	chr11:111383515-111383516	BTG4, C11orf88, MIR34B, MIR34C,	1	1
cg06459000	NA	0	0	0	0	1	NA	0	0	0	NA	0	0	NA	NA	0	0	0	NA	NA	0	0	0	0	0	0	0	NA	0	0	0	NA	NA	1	chr11	111411199	111411200	chr11:111411199-111411200	LAYN,	1	0
cg07627556	NA	0	0	0	0	1	NA	0	0	0	NA	0	0	NA	NA	0	0	0	NA	NA	0	0	1	1	0	0	0	NA	0	0	0	NA	NA	3	chr11	115530590	115530591	chr11:115530590-115530591	,	1	0
cg24266670	NA	0	0	1	0	0	NA	0	0	0	NA	0	0	NA	NA	0	0	0	NA	NA	0	0	0	0	0	0	0	NA	0	0	0	NA	NA	1	chr11	115630629	115630630	chr11:115630629-115630630	LINC00900,	1	1
cg13839457	NA	0	0	0	0	1	NA	0	0	0	NA	0	0	NA	NA	0	0	0	NA	NA	0	0	0	0	0	0	0	NA	0	0	0	NA	NA	1	chr11	115630889	115630890	chr11:115630889-115630890	LINC00900,	1	1
cg02455397	NA	0	0	0	0	1	NA	0	0	0	NA	0	0	NA	NA	0	0	0	NA	NA	0	0	0	0	0	0	0	NA	0	0	0	NA	NA	1	chr11	119293385	119293386	chr11:119293385-119293386	THY1, USP2-AS1,	0	1
cg03444715	NA	0	0	0	0	1	NA	0	0	0	NA	0	0	NA	NA	0	0	0	NA	NA	0	0	0	1	0	0	0	NA	0	0	0	NA	NA	2	chr11	122855029	122855030	chr11:122855029-122855030	BSX,	1	0
cg10096161	NA	0	0	0	0	1	NA	0	0	0	NA	0	0	NA	NA	0	0	0	NA	NA	0	0	0	0	0	0	0	NA	0	0	0	NA	NA	1	chr11	123229180	123229181	chr11:123229180-123229181	,	1	0
cg03167429	NA	0	0	0	0	1	NA	0	0	0	NA	0	0	NA	NA	0	0	0	NA	NA	0	0	0	0	0	0	0	NA	0	0	0	NA	NA	1	chr11	126870429	126870430	chr11:126870429-126870430	KIRREL3,	1	0
cg11017065	NA	0	0	0	0	1	NA	0	0	0	NA	0	0	NA	NA	0	0	0	NA	NA	0	0	0	1	0	0	1	NA	0	0	0	NA	NA	3	chr11	128564874	128564875	chr11:128564874-128564875	FLI1, SENCR,	1	1
cg06874656	NA	0	0	0	0	0	NA	1	0	0	NA	0	0	NA	NA	0	0	0	NA	NA	0	0	0	0	0	0	0	NA	0	0	0	NA	NA	1	chr11	131780353	131780354	chr11:131780353-131780354	NTM,	0	0
cg24284973	NA	0	0	1	0	0	NA	0	0	0	NA	0	0	NA	NA	0	0	0	NA	NA	0	0	0	0	0	0	0	NA	0	0	1	NA	NA	2	chr11	131780357	131780358	chr11:131780357-131780358	NTM,	0	0
cg00232735	NA	0	0	1	0	0	NA	0	0	0	NA	0	0	NA	NA	0	0	0	NA	NA	0	0	0	0	0	0	0	NA	0	0	0	NA	NA	1	chr11	132934139	132934140	chr11:132934139-132934140	OPCML,	1	0
cg07629355	NA	0	0	1	0	1	NA	0	0	0	NA	0	0	NA	NA	0	0	0	NA	NA	0	0	0	1	0	0	0	NA	0	0	0	NA	NA	3	chr11	133825519	133825520	chr11:133825519-133825520	IGSF9B,	1	0
cg04621578	NA	0	0	0	0	0	NA	0	0	0	NA	0	0	NA	NA	0	0	0	NA	NA	0	0	0	0	0	0	0	NA	0	0	1	NA	NA	1	chr11	133825703	133825704	chr11:133825703-133825704	IGSF9B,	1	0
cg03637878	NA	0	0	1	0	1	NA	0	0	0	NA	0	0	NA	NA	0	0	0	NA	NA	0	0	0	0	0	0	0	NA	0	0	0	NA	NA	2	chr11	133938788	133938789	chr11:133938788-133938789	JAM3,	0	0
cg24625128	NA	0	0	0	0	0	NA	0	0	0	NA	0	0	NA	NA	0	0	0	NA	NA	0	0	0	1	0	0	0	NA	0	0	0	NA	NA	1	chr11	133939064	133939065	chr11:133939064-133939065	JAM3,	0	0
cg03315869	NA	0	0	0	0	1	NA	0	0	0	NA	0	0	NA	NA	0	0	0	NA	NA	0	0	0	1	0	0	0	NA	0	0	0	NA	NA	2	chr11	134146676	134146677	chr11:134146676-134146677	GLB1L3,	0	0
cg19656577	NA	0	0	1	0	0	NA	0	0	0	NA	0	0	NA	NA	0	0	0	NA	NA	0	0	0	0	0	0	0	NA	0	0	0	NA	NA	1	chr12	3600229	3600230	chr12:3600229-3600230	PRMT8, THCAT155,	1	1
cg20392607	NA	0	0	0	0	0	NA	0	0	0	NA	0	0	NA	NA	0	0	0	NA	NA	0	0	0	1	0	0	0	NA	0	0	0	NA	NA	1	chr12	5018798	5018799	chr12:5018798-5018799	KCNA1,	1	0
cg19651132	NA	0	0	1	0	1	NA	0	0	0	NA	0	0	NA	NA	0	0	0	NA	NA	0	0	0	0	0	0	0	NA	0	0	0	NA	NA	2	chr12	5018805	5018806	chr12:5018805-5018806	KCNA1,	1	0
cg16643851	NA	0	0	0	0	1	NA	0	0	0	NA	0	0	NA	NA	0	0	0	NA	NA	0	0	0	0	0	0	0	NA	0	0	0	NA	NA	1	chr12	8542839	8542840	chr12:8542839-8542840	LINC00937,	0	1
cg09736112	NA	0	0	0	0	1	NA	0	0	0	NA	0	0	NA	NA	0	0	0	NA	NA	0	0	0	0	0	0	0	NA	0	0	0	NA	NA	1	chr12	15475690	15475691	chr12:15475690-15475691	PTPRO,	1	0
cg11901043	NA	0	0	1	0	0	NA	0	0	0	NA	0	0	NA	NA	0	0	0	NA	NA	0	0	0	0	0	0	0	NA	0	0	0	NA	NA	1	chr12	22093960	22093961	chr12:22093960-22093961	ABCC9,	1	0
cg10333808	NA	0	0	0	1	1	NA	0	0	0	NA	0	0	NA	NA	0	0	0	NA	NA	0	0	1	0	0	0	0	NA	0	0	0	NA	NA	3	chr12	22487459	22487460	chr12:22487459-22487460	ST8SIA1,	1	0
cg23811464	NA	0	0	0	0	1	NA	0	0	0	NA	0	0	NA	NA	0	0	0	NA	NA	0	0	0	0	0	0	0	NA	0	0	0	NA	NA	1	chr12	24716204	24716205	chr12:24716204-24716205	LINC00477, SOX5,	1	1
cg06630204	NA	0	0	0	0	1	NA	0	0	0	NA	0	0	NA	NA	0	0	0	NA	NA	0	0	0	1	0	0	0	NA	0	0	0	NA	NA	2	chr12	29937343	29937344	chr12:29937343-29937344	TMTC1,	0	0
cg10658542	NA	0	0	0	0	1	NA	0	0	0	NA	0	0	NA	NA	0	0	0	NA	NA	0	0	0	1	0	0	0	NA	0	0	0	NA	NA	2	chr12	33592642	33592643	chr12:33592642-33592643	SYT10,	1	0
cg15087347	NA	0	0	0	0	1	NA	0	0	0	NA	0	0	NA	NA	0	0	0	NA	NA	0	0	0	1	0	0	0	NA	0	0	0	NA	NA	2	chr12	41086227	41086228	chr12:41086227-41086228	CNTN1,	0	0
cg13186327	NA	0	0	0	0	1	NA	0	0	0	NA	0	0	NA	NA	0	0	0	NA	NA	0	0	0	1	0	0	0	NA	0	0	0	NA	NA	2	chr12	45444895	45444896	chr12:45444895-45444896	DBX2,	1	0
cg22868282	NA	0	1	0	0	0	NA	0	0	0	NA	0	0	NA	NA	0	0	0	NA	NA	0	0	0	0	0	0	0	NA	0	0	0	NA	NA	1	chr12	47224954	47224955	chr12:47224954-47224955	,	1	0
cg16321474	NA	0	0	0	0	0	NA	0	0	0	NA	0	0	NA	NA	0	0	0	NA	NA	0	0	0	0	0	1	0	NA	0	0	0	NA	NA	1	chr12	48299386	48299387	chr12:48299386-48299387	VDR,	1	0
cg18486102	NA	0	0	0	0	1	NA	0	0	0	NA	0	0	NA	NA	0	1	0	NA	NA	0	0	1	0	0	0	0	NA	0	0	0	NA	NA	3	chr12	50297777	50297778	chr12:50297777-50297778	FAIM2, LINC02396,	1	1
cg15336765	NA	0	0	0	0	1	NA	0	0	0	NA	0	0	NA	NA	0	0	0	NA	NA	0	0	0	1	0	0	0	NA	0	0	0	NA	NA	2	chr12	50355307	50355308	chr12:50355307-50355308	AQP5, LOC101927318,	1	1
cg04034767	NA	0	0	0	0	1	NA	0	0	0	NA	0	0	NA	NA	0	0	0	NA	NA	0	0	1	1	0	0	0	NA	0	0	0	NA	NA	3	chr12	52400907	52400908	chr12:52400907-52400908	GRASP,	1	0
cg10694030	NA	0	0	0	0	1	NA	0	0	0	NA	0	0	NA	NA	0	0	0	NA	NA	0	0	0	1	0	0	0	NA	0	0	0	NA	NA	2	chr12	54393460	54393461	chr12:54393460-54393461	HOXC-AS1,	1	1
cg23085912	NA	0	0	1	0	0	NA	0	0	0	NA	0	0	NA	NA	0	0	0	NA	NA	0	0	0	0	0	0	0	NA	0	0	0	NA	NA	1	chr12	63545523	63545524	chr12:63545523-63545524	AVPR1A,	1	0
cg23148701	NA	0	0	1	0	0	NA	0	0	0	NA	0	0	NA	NA	0	0	0	NA	NA	0	0	0	0	0	0	0	NA	0	0	0	NA	NA	1	chr12	64062498	64062499	chr12:64062498-64062499	DPY19L2,	0	0
cg17477445	NA	0	0	0	0	1	NA	0	0	0	NA	0	0	NA	NA	0	0	0	NA	NA	0	0	0	1	0	0	0	NA	0	0	0	NA	NA	2	chr12	64062526	64062527	chr12:64062526-64062527	DPY19L2,	0	0
cg23318812	NA	0	0	0	1	1	NA	0	0	0	NA	0	0	NA	NA	0	1	0	NA	NA	0	0	0	1	0	0	0	NA	0	0	0	NA	NA	4	chr12	66123127	66123128	chr12:66123127-66123128	,	1	0
cg26415547	NA	0	0	0	0	0	NA	0	1	0	NA	0	0	NA	NA	0	0	0	NA	NA	0	0	0	0	0	0	0	NA	0	0	0	NA	NA	1	chr12	66583048	66583049	chr12:66583048-66583049	IRAK3,	1	0
cg22376706	NA	0	0	1	0	0	NA	0	0	0	NA	0	0	NA	NA	0	0	0	NA	NA	0	0	0	0	0	0	0	NA	0	0	0	NA	NA	1	chr12	71314612	71314613	chr12:71314612-71314613	PTPRR,	1	0
cg23142394	NA	0	0	0	0	1	NA	0	0	0	NA	0	0	NA	NA	0	0	0	NA	NA	0	0	0	1	0	0	0	NA	0	0	0	NA	NA	2	chr12	72665771	72665772	chr12:72665771-72665772	TRHDE-AS1,	1	1
cg00580978	NA	0	0	1	0	0	NA	0	0	0	NA	0	0	NA	NA	0	0	0	NA	NA	0	0	0	0	0	0	0	NA	0	0	0	NA	NA	1	chr12	72667386	72667387	chr12:72667386-72667387	TRHDE,	1	0
cg15245095	NA	0	0	1	0	0	NA	0	0	0	NA	0	0	NA	NA	0	0	0	NA	NA	0	0	0	0	0	0	0	NA	0	0	0	NA	NA	1	chr12	79258438	79258439	chr12:79258438-79258439	SYT1,	0	0
cg14510812	NA	0	0	0	0	1	NA	0	0	0	NA	0	0	NA	NA	0	0	0	NA	NA	0	0	0	1	0	0	0	NA	0	0	0	NA	NA	2	chr12	85306797	85306798	chr12:85306797-85306798	SLC6A15,	0	0
cg25678815	NA	0	0	1	0	0	NA	0	0	0	NA	0	0	NA	NA	0	0	0	NA	NA	0	0	0	0	0	0	0	NA	0	0	0	NA	NA	1	chr12	85673915	85673916	chr12:85673915-85673916	ALX1,	1	0
cg11225410	NA	0	0	0	0	0	NA	0	0	0	NA	0	0	NA	NA	0	0	0	NA	NA	0	0	0	0	0	0	0	NA	0	0	1	NA	NA	1	chr12	93966317	93966318	chr12:93966317-93966318	SOCS2,	1	0
cg10557253	NA	0	0	1	0	0	NA	0	0	0	NA	0	0	NA	NA	0	0	0	NA	NA	0	0	0	0	0	0	0	NA	0	0	0	NA	NA	1	chr12	94543947	94543948	chr12:94543947-94543948	PLXNC1,	1	0
cg22538054	NA	0	0	0	0	1	NA	0	0	0	NA	0	0	NA	NA	1	0	0	NA	NA	0	0	1	1	0	0	0	NA	0	0	0	NA	NA	4	chr12	95941988	95941989	chr12:95941988-95941989	USP44,	0	1
cg26490054	NA	0	0	1	0	0	NA	0	0	0	NA	0	0	NA	NA	0	0	0	NA	NA	0	0	0	0	0	0	0	NA	0	0	0	NA	NA	1	chr12	101604056	101604057	chr12:101604056-101604057	SLC5A8,	1	0
cg18919225	NA	0	0	0	0	0	NA	0	0	0	NA	0	0	NA	NA	0	0	0	NA	NA	0	0	1	0	0	0	0	NA	0	0	0	NA	NA	1	chr12	103311494	103311495	chr12:103311494-103311495	PAH,	0	0
cg27420520	NA	0	0	0	0	1	NA	0	0	0	NA	0	0	NA	NA	0	0	0	NA	NA	0	0	0	1	0	0	1	NA	0	0	0	NA	NA	3	chr12	103352267	103352268	chr12:103352267-103352268	ASCL1,	1	0
cg20718350	NA	0	0	1	0	0	NA	0	0	1	NA	0	0	NA	NA	0	0	0	NA	NA	0	0	0	0	0	0	0	NA	0	0	0	NA	NA	2	chr12	103352294	103352295	chr12:103352294-103352295	ASCL1,	1	0
cg17315500	NA	0	0	1	0	0	NA	0	0	0	NA	0	0	NA	NA	0	0	0	NA	NA	0	0	0	0	0	0	0	NA	0	0	0	NA	NA	1	chr12	103359572	103359573	chr12:103359572-103359573	,	1	0
cg10096177	NA	0	0	1	0	0	NA	0	0	0	NA	0	0	NA	NA	0	0	0	NA	NA	0	0	0	1	0	0	0	NA	0	0	0	NA	NA	2	chr12	103889516	103889517	chr12:103889516-103889517	C12orf42,	0	1
cg07227926	NA	0	0	0	0	0	NA	0	0	0	NA	0	0	NA	NA	0	0	0	NA	NA	0	0	1	0	0	0	0	NA	0	0	0	NA	NA	1	chr12	104609526	104609527	chr12:104609526-104609527	TXNRD1,	1	0
cg11739675	NA	0	0	0	0	1	NA	0	0	0	NA	0	0	NA	NA	0	0	0	NA	NA	0	0	0	0	0	0	0	NA	0	0	0	NA	NA	1	chr12	104852151	104852152	chr12:104852151-104852152	CHST11,	1	0
cg23855505	NA	0	0	0	0	0	NA	0	0	0	NA	0	0	NA	NA	0	0	0	NA	NA	0	0	0	1	0	0	0	NA	0	0	0	NA	NA	1	chr12	104852439	104852440	chr12:104852439-104852440	CHST11,	1	0
cg22260952	NA	0	0	0	0	0	NA	0	0	0	NA	0	0	NA	NA	0	0	0	NA	NA	0	0	1	0	0	0	0	NA	0	0	0	NA	NA	1	chr12	104852446	104852447	chr12:104852446-104852447	CHST11,	1	0
cg21176643	NA	0	0	1	0	1	NA	0	0	0	NA	0	0	NA	NA	0	0	0	NA	NA	0	0	0	1	0	0	0	NA	0	0	0	NA	NA	3	chr12	106979874	106979875	chr12:106979874-106979875	LOC100287944, RFX4,	1	1
cg03352776	NA	0	0	0	0	1	NA	0	0	0	NA	0	0	NA	NA	0	0	0	NA	NA	0	0	0	0	0	0	0	NA	0	0	0	NA	NA	1	chr12	111471309	111471310	chr12:111471309-111471310	CUX2,	1	0
cg22685245	NA	0	0	0	0	1	NA	0	0	0	NA	0	0	NA	NA	0	0	0	NA	NA	0	0	0	0	0	0	0	NA	0	0	0	NA	NA	1	chr12	113495037	113495038	chr12:113495037-113495038	DTX1,	1	0
cg21962423	NA	0	0	1	0	0	NA	0	0	0	NA	0	0	NA	NA	0	0	0	NA	NA	0	0	0	0	0	0	0	NA	0	0	0	NA	NA	1	chr12	113913887	113913888	chr12:113913887-113913888	LHX5-AS1,	1	1
cg27464184	NA	0	0	1	0	0	NA	0	0	0	NA	0	0	NA	NA	0	0	0	NA	NA	0	0	0	0	0	0	0	NA	0	0	0	NA	NA	1	chr12	114075881	114075882	chr12:114075881-114075882	,	1	0
cg14214262	NA	0	0	1	0	0	NA	0	0	0	NA	0	0	NA	NA	0	0	0	NA	NA	0	0	0	0	0	0	0	NA	0	0	0	NA	NA	1	chr12	114843188	114843189	chr12:114843188-114843189	TBX5,	1	0
cg06911121	NA	0	0	1	0	0	NA	0	0	0	NA	0	0	NA	NA	0	0	0	NA	NA	0	0	0	0	0	0	0	NA	0	0	1	NA	NA	2	chr12	114847164	114847165	chr12:114847164-114847165	TBX5-AS1,	1	1
cg15266705	NA	0	0	0	0	0	NA	0	0	0	NA	0	0	NA	NA	0	0	0	NA	NA	0	0	1	0	0	0	0	NA	0	0	0	NA	NA	1	chr12	115136096	115136097	chr12:115136096-115136097	,	1	0
cg04529785	NA	0	0	0	0	1	NA	0	0	0	NA	0	0	NA	NA	0	0	0	NA	NA	0	0	0	1	0	0	0	NA	0	0	0	NA	NA	2	chr12	117799083	117799084	chr12:117799083-117799084	NOS1,	1	0
cg21011827	NA	0	0	0	0	0	NA	0	0	0	NA	0	0	NA	NA	0	0	0	NA	NA	0	0	0	1	0	0	0	NA	0	0	0	NA	NA	1	chr12	120032374	120032375	chr12:120032374-120032375	TMEM233,	1	0
cg14262439	NA	0	0	1	0	0	NA	0	0	0	NA	0	0	NA	NA	0	0	0	NA	NA	0	0	0	0	0	0	0	NA	0	0	0	NA	NA	1	chr12	126018155	126018156	chr12:126018155-126018156	TMEM132B,	0	0
cg21549294	NA	0	0	1	0	0	NA	0	0	0	NA	0	0	NA	NA	0	0	0	NA	NA	0	0	0	0	0	0	0	NA	0	0	0	NA	NA	1	chr12	127865703	127865704	chr12:127865703-127865704	,	0	0
cg04475027	NA	0	1	1	0	1	NA	0	0	1	NA	0	0	NA	NA	0	0	0	NA	NA	0	0	0	1	0	0	0	NA	0	0	0	NA	NA	5	chr12	128752040	128752041	chr12:128752040-128752041	TMEM132C,	1	0
cg02543772	NA	0	0	1	0	0	NA	0	0	0	NA	0	0	NA	NA	0	0	0	NA	NA	0	0	0	0	0	0	0	NA	0	0	0	NA	NA	1	chr12	128850630	128850631	chr12:128850630-128850631	TMEM132C,	1	0
cg08110542	NA	0	0	0	0	1	NA	0	0	0	NA	0	0	NA	NA	0	0	0	NA	NA	0	0	0	0	0	0	0	NA	0	0	0	NA	NA	1	chr12	131199936	131199937	chr12:131199936-131199937	,	1	0
cg19724555	NA	0	0	1	0	0	NA	0	0	0	NA	0	0	NA	NA	0	0	0	NA	NA	0	0	0	0	0	0	0	NA	0	0	0	NA	NA	1	chr12	132906439	132906440	chr12:132906439-132906440	LOC101928416,	1	1
cg26620450	NA	0	0	0	0	1	NA	0	0	0	NA	0	0	NA	NA	0	0	0	NA	NA	0	0	0	0	0	0	0	NA	0	0	0	NA	NA	1	chr12	133195061	133195062	chr12:133195061-133195062	P2RX2,	1	0
cg24427504	NA	0	0	1	0	0	NA	0	1	0	NA	0	0	NA	NA	0	0	0	NA	NA	0	0	0	0	0	0	0	NA	0	0	1	NA	NA	3	chr12	133481520	133481521	chr12:133481520-133481521	,	0	0
cg20880234	NA	0	0	0	0	0	NA	0	1	0	NA	0	0	NA	NA	0	0	0	NA	NA	0	0	0	0	0	0	0	NA	0	0	0	NA	NA	1	chr13	20531619	20531620	chr13:20531619-20531620	ZMYM2,	0	0
cg11521404	NA	0	0	0	0	0	NA	0	0	0	NA	0	0	NA	NA	0	0	0	NA	NA	0	0	1	0	0	0	0	NA	0	0	0	NA	NA	1	chr13	20735532	20735533	chr13:20735532-20735533	GJA3,	1	0
cg19356117	NA	0	0	0	0	1	NA	0	0	0	NA	0	0	NA	NA	0	0	0	NA	NA	0	0	0	1	0	0	0	NA	0	0	0	NA	NA	2	chr13	23734304	23734305	chr13:23734304-23734305	,	1	0
cg14270789	NA	0	0	0	0	1	NA	0	0	0	NA	0	0	NA	NA	0	0	0	NA	NA	0	0	0	0	0	0	0	NA	0	0	0	NA	NA	1	chr13	25620954	25620955	chr13:25620954-25620955	,	1	0
cg17565078	NA	0	0	0	0	1	NA	0	0	0	NA	0	0	NA	NA	0	0	0	NA	NA	0	0	0	0	0	0	0	NA	0	0	0	NA	NA	1	chr13	27334723	27334724	chr13:27334723-27334724	GPR12,	1	0
cg25546248	NA	0	0	0	0	0	NA	0	0	0	NA	0	0	NA	NA	0	0	0	NA	NA	0	0	0	0	0	0	0	NA	0	0	1	NA	NA	1	chr13	28395783	28395784	chr13:28395783-28395784	PLUT,	1	1
cg01193690	NA	0	0	1	0	0	NA	0	0	1	NA	0	0	NA	NA	0	0	0	NA	NA	0	0	0	0	0	0	0	NA	0	0	0	NA	NA	2	chr13	28491615	28491616	chr13:28491615-28491616	PDX1, PLUT,	1	1
cg19587904	NA	1	0	0	0	0	NA	0	0	0	NA	0	0	NA	NA	0	0	0	NA	NA	0	0	0	0	0	0	0	NA	0	0	0	NA	NA	1	chr13	28492425	28492426	chr13:28492425-28492426	PDX1, PLUT,	1	1
cg22578843	NA	0	0	1	0	0	NA	0	0	0	NA	0	0	NA	NA	0	0	0	NA	NA	0	0	0	0	0	0	0	NA	0	0	0	NA	NA	1	chr13	28495598	28495599	chr13:28495598-28495599	PDX1,	1	0
cg07213036	NA	0	0	1	0	0	NA	0	0	0	NA	0	0	NA	NA	0	0	0	NA	NA	0	0	0	0	0	0	0	NA	0	0	0	NA	NA	1	chr13	28542727	28542728	chr13:28542727-28542728	CDX2,	1	0
cg25591794	NA	0	0	1	0	0	NA	0	0	0	NA	0	0	NA	NA	0	0	0	NA	NA	0	0	0	0	0	0	0	NA	0	0	0	NA	NA	1	chr13	28554842	28554843	chr13:28554842-28554843	URAD,	1	0
cg25895961	NA	0	0	1	0	1	NA	0	0	0	NA	0	0	NA	NA	0	0	0	NA	NA	0	0	0	1	0	0	0	NA	0	0	0	NA	NA	3	chr13	29106422	29106423	chr13:29106422-29106423	,	1	0
cg18682423	NA	0	0	1	0	0	NA	0	0	0	NA	0	0	NA	NA	0	0	0	NA	NA	0	0	0	0	0	0	0	NA	0	0	0	NA	NA	1	chr13	29293279	29293280	chr13:29293279-29293280	SLC46A3,	1	0
cg20219457	NA	0	0	0	0	1	NA	0	0	0	NA	0	0	NA	NA	0	0	0	NA	NA	0	0	0	1	0	0	0	NA	0	0	0	NA	NA	2	chr13	36705446	36705447	chr13:36705446-36705447	DCLK1,	1	0
cg13258563	NA	0	0	0	0	1	NA	0	0	0	NA	0	0	NA	NA	0	0	0	NA	NA	0	0	0	1	0	0	0	NA	0	0	0	NA	NA	2	chr13	36871962	36871963	chr13:36871962-36871963	CCDC169, CCDC169-SOHLH2,	0	0
cg16741041	NA	0	0	0	0	1	NA	0	0	0	NA	0	0	NA	NA	0	0	0	NA	NA	0	0	0	1	0	0	0	NA	0	0	0	NA	NA	2	chr13	36920332	36920333	chr13:36920332-36920333	SPG20,	0	0
cg06639332	NA	0	0	0	0	1	NA	0	0	0	NA	0	0	NA	NA	0	0	0	NA	NA	0	0	0	1	0	0	0	NA	0	0	0	NA	NA	2	chr13	37248305	37248306	chr13:37248305-37248306	SERTM1,	1	0
cg15071251	NA	0	0	0	0	1	NA	0	0	0	NA	0	0	NA	NA	0	0	0	NA	NA	0	0	0	0	0	0	0	NA	0	0	0	NA	NA	1	chr13	38443634	38443635	chr13:38443634-38443635	TRPC4,	0	0
cg13549719	NA	0	0	0	0	0	NA	0	0	0	NA	0	0	NA	NA	0	0	0	NA	NA	0	0	0	1	0	0	0	NA	0	0	0	NA	NA	1	chr13	38444052	38444053	chr13:38444052-38444053	TRPC4,	0	0
cg13975523	NA	0	0	0	0	1	NA	0	0	0	NA	0	0	NA	NA	0	0	0	NA	NA	0	0	0	0	0	0	0	NA	0	0	0	NA	NA	1	chr13	43148684	43148685	chr13:43148684-43148685	TNFSF11,	0	0
cg00880018	NA	0	0	0	0	0	NA	0	0	0	NA	0	0	NA	NA	0	0	0	NA	NA	0	0	0	0	0	0	1	NA	0	0	0	NA	NA	1	chr13	43149171	43149172	chr13:43149171-43149172	TNFSF11,	0	0
cg04922681	NA	0	0	0	0	0	NA	0	1	0	NA	0	0	NA	NA	0	0	0	NA	NA	0	0	0	0	0	0	0	NA	0	0	0	NA	NA	1	chr13	43149234	43149235	chr13:43149234-43149235	TNFSF11,	0	0
cg08567279	NA	0	0	1	0	0	NA	0	0	0	NA	0	0	NA	NA	0	0	0	NA	NA	0	0	0	0	0	0	0	NA	0	0	1	NA	NA	2	chr13	53313529	53313530	chr13:53313529-53313530	CNMD,	0	0
cg25600049	NA	0	0	0	0	0	NA	0	0	0	NA	0	0	NA	NA	0	0	0	NA	NA	0	0	0	1	0	0	0	NA	0	0	0	NA	NA	1	chr13	53419729	53419730	chr13:53419729-53419730	PCDH8,	1	0
cg09813525	NA	0	0	0	1	1	NA	0	0	0	NA	0	0	NA	NA	0	0	0	NA	NA	0	0	0	0	0	0	0	NA	0	0	0	NA	NA	2	chr13	53420386	53420387	chr13:53420386-53420387	PCDH8,	1	0
cg22763718	NA	1	0	1	1	0	NA	0	0	1	NA	0	0	NA	NA	0	0	0	NA	NA	0	0	0	0	0	0	0	NA	0	0	0	NA	NA	4	chr13	53422780	53422781	chr13:53422780-53422781	PCDH8,	1	0
cg17535595	NA	0	0	0	0	1	NA	0	0	0	NA	0	0	NA	NA	0	0	0	NA	NA	0	0	0	0	0	0	0	NA	0	0	0	NA	NA	1	chr13	53422808	53422809	chr13:53422808-53422809	PCDH8,	1	0
cg08705697	NA	0	0	1	0	0	NA	0	0	0	NA	0	0	NA	NA	0	0	0	NA	NA	0	0	0	0	0	0	0	NA	0	0	0	NA	NA	1	chr13	67804744	67804745	chr13:67804744-67804745	PCDH9,	0	0
cg14123923	NA	0	0	0	1	0	NA	1	0	0	NA	0	0	NA	NA	0	0	0	NA	NA	0	0	0	0	0	0	0	NA	0	0	0	NA	NA	2	chr13	79176572	79176573	chr13:79176572-79176573	POU4F1, RNF219-AS1,	1	1
cg25081106	NA	0	0	1	0	1	NA	0	0	0	NA	0	0	NA	NA	0	0	0	NA	NA	0	0	0	0	0	0	0	NA	0	0	0	NA	NA	2	chr13	88324169	88324170	chr13:88324169-88324170	MIR4500HG, SLITRK5,	1	1
cg15778745	NA	0	0	0	0	0	NA	0	0	0	NA	0	0	NA	NA	0	0	0	NA	NA	0	0	0	1	0	0	0	NA	0	0	0	NA	NA	1	chr13	88324570	88324571	chr13:88324570-88324571	MIR4500HG, SLITRK5,	1	1
cg16423505	NA	0	0	1	0	1	NA	0	0	0	NA	0	0	NA	NA	0	0	0	NA	NA	0	0	0	0	0	0	0	NA	0	0	0	NA	NA	2	chr13	92051400	92051401	chr13:92051400-92051401	GPC5,	1	0
cg19824907	NA	0	0	1	0	1	NA	0	0	0	NA	0	0	NA	NA	0	0	0	NA	NA	0	0	0	0	0	0	0	NA	0	0	0	NA	NA	2	chr13	93879303	93879304	chr13:93879303-93879304	GPC6,	0	0
cg14778311	NA	0	0	0	0	0	NA	0	0	0	NA	0	0	NA	NA	0	0	0	NA	NA	0	0	0	1	0	0	0	NA	0	0	0	NA	NA	1	chr13	93880842	93880843	chr13:93880842-93880843	GPC6,	0	0
cg27442308	NA	0	0	0	0	1	NA	0	0	0	NA	0	0	NA	NA	0	0	0	NA	NA	0	0	0	1	0	0	0	NA	0	0	0	NA	NA	2	chr13	95364675	95364676	chr13:95364675-95364676	SOX21,	1	0
cg25264081	NA	0	0	0	0	1	NA	0	0	0	NA	0	0	NA	NA	0	0	0	NA	NA	0	0	0	1	0	0	0	NA	0	0	0	NA	NA	2	chr13	95620306	95620307	chr13:95620306-95620307	,	0	0
cg10305311	NA	0	0	0	0	1	NA	0	0	0	NA	0	0	NA	NA	0	0	0	NA	NA	0	0	0	1	0	0	0	NA	0	0	0	NA	NA	2	chr13	96204873	96204874	chr13:96204873-96204874	CLDN10,	1	0
cg27513979	NA	0	0	1	0	1	NA	0	0	0	NA	0	0	NA	NA	0	0	0	NA	NA	0	0	0	0	0	0	0	NA	0	0	0	NA	NA	2	chr13	96743895	96743896	chr13:96743895-96743896	HS6ST3,	1	0
cg12907379	NA	1	0	1	0	0	NA	0	0	0	NA	0	0	NA	NA	0	0	0	NA	NA	0	0	0	0	0	0	0	NA	0	0	0	NA	NA	2	chr13	100624130	100624131	chr13:100624130-100624131	ZIC5,	0	1
cg25201811	NA	0	0	0	0	1	NA	0	0	0	NA	0	0	NA	NA	0	0	0	NA	NA	0	0	0	1	0	0	0	NA	0	0	0	NA	NA	2	chr13	102068530	102068531	chr13:102068530-102068531	NALCN,	1	0
cg16398329	NA	0	0	0	0	1	NA	0	0	0	NA	0	0	NA	NA	0	0	0	NA	NA	0	0	0	1	0	0	0	NA	0	0	0	NA	NA	2	chr13	103047053	103047054	chr13:103047053-103047054	FGF14, FGF14-AS2,	0	1
cg04561389	NA	0	0	0	0	1	NA	0	0	0	NA	0	0	NA	NA	0	0	0	NA	NA	0	0	0	0	0	0	0	NA	0	0	0	NA	NA	1	chr13	103052468	103052469	chr13:103052468-103052469	FGF14,	1	0
cg22583065	NA	0	0	0	0	0	NA	0	0	0	NA	0	0	NA	NA	0	0	0	NA	NA	0	0	0	1	0	0	0	NA	0	0	0	NA	NA	1	chr13	103052828	103052829	chr13:103052828-103052829	FGF14,	1	0
cg22302985	NA	0	0	1	0	0	NA	0	0	0	NA	0	0	NA	NA	0	0	0	NA	NA	0	0	0	1	0	0	0	NA	0	0	0	NA	NA	2	chr13	108520945	108520946	chr13:108520945-108520946	FAM155A,	1	0
cg21938148	NA	0	0	0	0	1	NA	0	0	0	NA	0	0	NA	NA	0	0	0	NA	NA	0	0	0	1	0	0	0	NA	0	0	0	NA	NA	2	chr13	110958977	110958978	chr13:110958977-110958978	COL4A1,	1	0
cg11437784	NA	1	0	1	0	0	NA	0	0	0	NA	0	0	NA	NA	0	0	0	NA	NA	0	0	0	0	0	0	0	NA	0	0	1	NA	NA	3	chr13	112710823	112710824	chr13:112710823-112710824	LINC00403,	1	1
cg27301032	NA	0	0	1	0	0	NA	0	0	0	NA	0	0	NA	NA	0	0	0	NA	NA	0	0	0	0	0	0	0	NA	0	0	0	NA	NA	1	chr13	112721425	112721426	chr13:112721425-112721426	LINC00403,	1	1
cg25463470	NA	0	0	0	0	0	NA	0	0	0	NA	0	0	NA	NA	0	0	0	NA	NA	0	0	0	0	0	0	0	NA	0	0	1	NA	NA	1	chr13	112721712	112721713	chr13:112721712-112721713	LINC00403,	1	1
cg15228928	NA	0	0	1	0	0	NA	0	0	0	NA	0	0	NA	NA	0	0	0	NA	NA	0	0	0	0	0	0	0	NA	0	0	0	NA	NA	1	chr13	112727521	112727522	chr13:112727521-112727522	LINC00403,	1	1
cg11186405	NA	0	0	0	0	1	NA	0	0	0	NA	0	0	NA	NA	0	0	0	NA	NA	0	0	0	0	0	0	0	NA	0	0	0	NA	NA	1	chr13	112728206	112728207	chr13:112728206-112728207	LINC00403,	1	1
cg23934404	NA	0	0	1	0	0	NA	0	0	1	NA	0	0	NA	NA	0	0	0	NA	NA	0	0	0	0	0	1	0	NA	0	0	0	NA	NA	3	chr13	112758491	112758492	chr13:112758491-112758492	LINC00403,	1	1
cg01762070	NA	0	0	1	0	0	NA	0	0	0	NA	0	0	NA	NA	0	0	0	NA	NA	0	0	0	0	0	0	0	NA	0	0	0	NA	NA	1	chr14	21101007	21101008	chr14:21101007-21101008	,	0	0
cg00800229	NA	0	1	0	0	0	NA	0	0	0	NA	0	0	NA	NA	0	0	0	NA	NA	0	0	1	0	0	0	0	NA	0	0	0	NA	NA	2	chr14	22004993	22004994	chr14:22004993-22004994	SALL2,	0	1
cg18844382	NA	0	0	0	0	1	NA	0	0	0	NA	0	0	NA	NA	0	0	0	NA	NA	0	0	1	1	0	0	0	NA	0	0	0	NA	NA	3	chr14	23834977	23834978	chr14:23834977-23834978	EFS,	1	0
cg16215203	NA	0	0	0	0	0	NA	0	0	0	NA	0	0	NA	NA	0	0	0	NA	NA	0	0	1	0	0	0	0	NA	0	0	0	NA	NA	1	chr14	24803917	24803918	chr14:24803917-24803918	ADCY4,	1	0
cg07559273	NA	0	0	1	0	1	NA	0	0	0	NA	0	0	NA	NA	0	0	0	NA	NA	0	0	0	0	0	0	0	NA	0	0	0	NA	NA	2	chr14	27066404	27066405	chr14:27066404-27066405	NOVA1,	0	0
cg04723401	NA	0	0	1	0	0	NA	0	0	0	NA	0	0	NA	NA	0	0	0	NA	NA	0	0	0	0	0	0	0	NA	0	0	1	NA	NA	2	chr14	29229249	29229250	chr14:29229249-29229250	FOXG1-AS1,	1	1
cg24773418	NA	0	0	0	0	1	NA	0	0	0	NA	0	0	NA	NA	0	0	0	NA	NA	0	0	0	0	0	0	0	NA	0	0	0	NA	NA	1	chr14	33402512	33402513	chr14:33402512-33402513	,	1	0
cg05134015	NA	0	0	1	0	1	NA	1	0	1	NA	0	0	NA	NA	0	0	0	NA	NA	0	0	0	0	0	0	0	NA	0	0	0	NA	NA	4	chr14	36973365	36973366	chr14:36973365-36973366	SFTA3,	1	1
cg06945523	NA	0	0	0	0	0	NA	0	0	0	NA	0	0	NA	NA	0	0	0	NA	NA	0	0	1	0	0	0	0	NA	0	0	0	NA	NA	1	chr14	36974800	36974801	chr14:36974800-36974801	SFTA3,	1	1
cg05372242	NA	0	0	1	0	0	NA	0	0	1	NA	0	0	NA	NA	0	0	0	NA	NA	0	0	0	0	0	0	0	NA	0	0	0	NA	NA	2	chr14	36983542	36983543	chr14:36983542-36983543	SFTA3,	1	1
cg25996119	NA	0	0	1	0	0	NA	0	0	0	NA	0	0	NA	NA	0	0	0	NA	NA	0	0	0	0	0	0	0	NA	0	0	0	NA	NA	1	chr14	36990534	36990535	chr14:36990534-36990535	NKX2-1-AS1,	1	1
cg25566568	NA	0	0	1	0	0	NA	0	0	0	NA	0	0	NA	NA	0	0	0	NA	NA	0	0	0	0	0	0	0	NA	0	0	0	NA	NA	1	chr14	36995009	36995010	chr14:36995009-36995010	NKX2-1-AS1,	1	1
cg05917460	NA	1	0	0	0	0	NA	0	0	0	NA	0	0	NA	NA	0	0	1	NA	NA	0	0	0	0	0	0	0	NA	0	0	0	NA	NA	2	chr14	37126902	37126903	chr14:37126902-37126903	PAX9,	1	0
cg10160975	NA	0	0	1	0	1	NA	0	0	0	NA	0	0	NA	NA	0	0	0	NA	NA	0	0	0	1	0	0	0	NA	0	0	0	NA	NA	3	chr14	42075810	42075811	chr14:42075810-42075811	LRFN5,	1	1
cg18683604	NA	0	0	0	0	0	NA	0	0	0	NA	0	0	NA	NA	0	0	0	NA	NA	0	0	0	0	0	0	1	NA	0	0	0	NA	NA	1	chr14	51561293	51561294	chr14:51561293-51561294	TRIM9,	1	0
cg07975778	NA	0	0	0	0	0	NA	1	0	0	NA	0	0	NA	NA	0	0	0	NA	NA	0	0	0	0	0	0	0	NA	0	0	0	NA	NA	1	chr14	52535425	52535426	chr14:52535425-52535426	NID2,	1	0
cg13592399	NA	1	0	0	0	0	NA	0	0	0	NA	0	0	NA	NA	0	0	0	NA	NA	0	0	0	0	0	0	0	NA	0	0	0	NA	NA	1	chr14	52535758	52535759	chr14:52535758-52535759	NID2,	1	0
cg01781974	NA	0	0	1	0	0	NA	0	0	0	NA	0	0	NA	NA	0	0	0	NA	NA	0	0	0	0	0	0	0	NA	0	0	0	NA	NA	1	chr14	52535973	52535974	chr14:52535973-52535974	NID2,	1	0
cg26394244	NA	0	0	0	0	0	NA	0	0	1	NA	0	0	NA	NA	0	0	0	NA	NA	0	0	0	0	0	0	0	NA	0	0	0	NA	NA	1	chr14	52536066	52536067	chr14:52536066-52536067	NID2,	1	0
cg05302386	NA	0	0	1	0	0	NA	0	0	0	NA	0	0	NA	NA	0	0	0	NA	NA	0	0	0	0	0	0	0	NA	0	0	0	NA	NA	1	chr14	52734525	52734526	chr14:52734525-52734526	PTGDR,	1	0
cg27634876	NA	0	0	0	0	0	NA	0	0	1	NA	0	0	NA	NA	0	0	0	NA	NA	0	0	0	0	0	0	0	NA	0	0	1	NA	NA	2	chr14	52735485	52735486	chr14:52735485-52735486	PTGDR,	1	0
cg08162372	NA	0	0	0	0	0	NA	0	0	0	NA	0	0	NA	NA	1	0	0	NA	NA	0	0	1	0	0	0	0	NA	0	0	0	NA	NA	2	chr14	54422925	54422926	chr14:54422925-54422926	BMP4,	1	0
cg10042106	NA	0	0	1	0	0	NA	0	0	0	NA	0	0	NA	NA	0	0	0	NA	NA	0	0	0	0	0	0	0	NA	0	0	0	NA	NA	1	chr14	57274739	57274740	chr14:57274739-57274740	OTX2,	1	1
cg14409023	NA	0	0	1	0	1	NA	1	0	1	NA	0	0	NA	NA	0	0	1	NA	NA	0	0	0	0	0	0	0	NA	0	0	0	NA	NA	5	chr14	57283436	57283437	chr14:57283436-57283437	OTX2-AS1,	1	1
cg09859398	NA	0	0	0	0	0	NA	0	0	1	NA	0	0	NA	NA	0	0	0	NA	NA	0	0	0	0	0	0	0	NA	0	0	0	NA	NA	1	chr14	59932033	59932034	chr14:59932033-59932034	GPR135,	1	0
cg01141940	NA	0	0	1	0	0	NA	0	0	1	NA	0	0	NA	NA	0	0	0	NA	NA	0	0	0	0	0	0	0	NA	0	0	0	NA	NA	2	chr14	60097247	60097248	chr14:60097247-60097248	RTN1,	1	0
cg16406225	NA	0	0	1	0	0	NA	0	0	0	NA	0	0	NA	NA	0	0	0	NA	NA	0	0	0	0	0	0	0	NA	0	0	0	NA	NA	1	chr14	60386050	60386051	chr14:60386050-60386051	LRRC9,	0	1
cg22943762	NA	0	0	0	0	0	NA	0	0	0	NA	0	0	NA	NA	0	0	0	NA	NA	0	0	0	0	0	1	0	NA	0	0	0	NA	NA	1	chr14	61188245	61188246	chr14:61188245-61188246	SIX4,	0	0
cg22871002	NA	0	0	0	0	1	NA	0	0	0	NA	0	0	NA	NA	0	0	0	NA	NA	0	0	0	1	0	0	0	NA	0	0	0	NA	NA	2	chr14	62279623	62279624	chr14:62279623-62279624	,	1	0
cg07471209	NA	0	0	1	0	1	NA	0	0	0	NA	0	0	NA	NA	0	0	0	NA	NA	0	0	0	1	0	0	0	NA	0	0	0	NA	NA	3	chr14	62584278	62584279	chr14:62584278-62584279	LINC00643,	1	1
cg01646639	NA	0	0	0	0	0	NA	0	0	0	NA	0	0	NA	NA	0	0	0	NA	NA	0	0	1	0	0	0	0	NA	0	0	0	NA	NA	1	chr14	70654290	70654291	chr14:70654290-70654291	LOC646548, SLC8A3,	1	1
cg13652513	NA	0	0	0	0	0	NA	0	0	0	NA	0	0	NA	NA	0	0	0	NA	NA	0	0	0	1	0	0	0	NA	0	0	0	NA	NA	1	chr14	70654597	70654598	chr14:70654597-70654598	LOC646548, SLC8A3,	1	1
cg04140862	NA	0	0	0	0	1	NA	0	0	0	NA	0	0	NA	NA	0	0	0	NA	NA	0	0	0	0	0	0	0	NA	0	0	0	NA	NA	1	chr14	70654639	70654640	chr14:70654639-70654640	LOC646548, SLC8A3,	1	1
cg20065569	NA	0	0	0	0	0	NA	0	1	0	NA	0	0	NA	NA	0	0	0	NA	NA	0	0	0	0	0	0	0	NA	0	0	0	NA	NA	1	chr14	73958280	73958281	chr14:73958280-73958281	HEATR4, RIOX1,	0	0
cg05829782	NA	0	0	0	0	1	NA	0	0	0	NA	0	0	NA	NA	0	0	0	NA	NA	0	0	0	0	0	0	0	NA	0	0	0	NA	NA	1	chr14	74707911	74707912	chr14:74707911-74707912	VSX2,	1	0
cg23272632	NA	0	0	0	0	1	NA	0	0	0	NA	0	0	NA	NA	0	0	0	NA	NA	0	0	0	0	0	0	0	NA	0	0	0	NA	NA	1	chr14	77737146	77737147	chr14:77737146-77737147	NGB,	1	0
cg26288577	NA	0	0	0	0	0	NA	0	0	0	NA	0	0	NA	NA	0	0	0	NA	NA	0	0	1	0	0	0	0	NA	0	0	0	NA	NA	1	chr14	91580429	91580430	chr14:91580429-91580430	C14orf159,	0	0
cg21883802	NA	0	0	0	0	0	NA	0	0	0	NA	0	0	NA	NA	0	0	0	NA	NA	0	0	1	0	0	0	0	NA	0	0	0	NA	NA	1	chr14	92413706	92413707	chr14:92413706-92413707	FBLN5,	1	0
cg01533258	NA	0	0	0	0	1	NA	0	0	0	NA	0	0	NA	NA	0	0	0	NA	NA	0	0	0	0	0	0	0	NA	0	0	0	NA	NA	1	chr14	95235489	95235490	chr14:95235489-95235490	GSC,	1	0
cg21495612	NA	0	0	1	0	0	NA	0	0	0	NA	0	0	NA	NA	0	0	0	NA	NA	0	0	0	0	0	0	0	NA	0	0	0	NA	NA	1	chr14	96342250	96342251	chr14:96342250-96342251	TUNAR,	1	1
cg24034005	NA	0	0	1	0	0	NA	0	0	0	NA	0	0	NA	NA	0	0	0	NA	NA	0	0	1	0	0	0	0	NA	0	0	0	NA	NA	2	chr14	97059192	97059193	chr14:97059192-97059193	,	1	0
cg04700283	NA	0	0	0	0	0	NA	0	0	0	NA	0	0	NA	NA	0	0	0	NA	NA	0	0	0	1	0	0	0	NA	0	0	0	NA	NA	1	chr14	97685386	97685387	chr14:97685386-97685387	,	1	0
cg19891001	NA	0	0	0	0	1	NA	0	0	0	NA	0	0	NA	NA	0	0	0	NA	NA	0	0	0	1	0	0	0	NA	0	0	0	NA	NA	2	chr14	100438221	100438222	chr14:100438221-100438222	EVL,	1	0
cg18362509	NA	0	0	0	0	0	NA	0	0	0	NA	0	0	NA	NA	0	0	0	NA	NA	0	0	0	1	0	0	0	NA	0	0	0	NA	NA	1	chr14	101925705	101925706	chr14:101925705-101925706	,	1	0
cg01556502	NA	0	0	0	0	0	NA	0	0	0	NA	0	0	NA	NA	0	0	0	NA	NA	0	0	0	0	0	0	0	NA	0	0	1	NA	NA	1	chr14	103655568	103655569	chr14:103655568-103655569	LINC00605,	1	1
cg01545587	NA	0	0	0	0	1	NA	0	0	0	NA	0	0	NA	NA	0	0	0	NA	NA	0	0	0	0	0	0	0	NA	0	0	0	NA	NA	1	chr14	105993579	105993580	chr14:105993579-105993580	TMEM121,	1	0
cg15278646	NA	0	0	0	0	1	NA	0	0	0	NA	0	0	NA	NA	0	0	0	NA	NA	0	0	0	0	0	0	0	NA	0	0	0	NA	NA	1	chr15	28341980	28341981	chr15:28341980-28341981	OCA2,	1	0
cg03061682	NA	0	0	0	0	1	NA	0	0	0	NA	0	0	NA	NA	0	0	0	NA	NA	0	0	0	1	0	0	0	NA	0	0	0	NA	NA	2	chr15	28352098	28352099	chr15:28352098-28352099	HERC2,	1	0
cg12012932	NA	0	0	1	0	0	NA	0	0	0	NA	0	0	NA	NA	0	0	0	NA	NA	0	0	0	0	0	0	0	NA	0	0	0	NA	NA	1	chr15	30484033	30484034	chr15:30484033-30484034	LINC02249,	0	1
cg14344315	NA	0	0	0	0	0	NA	0	1	0	NA	0	0	NA	NA	0	0	0	NA	NA	0	0	0	0	0	0	0	NA	0	0	0	NA	NA	1	chr15	31733445	31733446	chr15:31733445-31733446	,	1	0
cg08495115	NA	1	0	0	0	0	NA	0	0	0	NA	0	0	NA	NA	0	0	0	NA	NA	0	0	0	0	0	0	0	NA	0	0	0	NA	NA	1	chr15	33010399	33010400	chr15:33010399-33010400	GREM1, LOC100131315,	1	1
cg26727488	NA	0	0	1	0	0	NA	0	0	1	NA	0	0	NA	NA	0	0	0	NA	NA	0	0	0	0	0	0	0	NA	0	0	0	NA	NA	2	chr15	33011166	33011167	chr15:33011166-33011167	GREM1,	1	0
cg24922143	NA	0	0	0	0	0	NA	0	0	0	NA	0	0	NA	NA	0	0	0	NA	NA	0	0	1	0	0	0	0	NA	0	0	0	NA	NA	1	chr15	35014270	35014271	chr15:35014270-35014271	,	0	0
cg27494383	NA	0	0	0	0	0	NA	0	0	0	NA	0	0	NA	NA	0	0	0	NA	NA	0	0	1	0	0	0	0	NA	0	0	0	NA	NA	1	chr15	41805868	41805869	chr15:41805868-41805869	LTK,	1	0
cg02550961	NA	0	0	0	0	0	NA	0	0	0	NA	0	0	NA	NA	0	0	0	NA	NA	0	0	1	0	0	0	0	NA	0	0	0	NA	NA	1	chr15	45406866	45406867	chr15:45406866-45406867	DUOXA2,	1	0
cg18384926	NA	0	0	0	0	0	NA	0	1	0	NA	0	0	NA	NA	0	0	0	NA	NA	0	0	0	0	0	0	0	NA	0	0	1	NA	NA	2	chr15	45722598	45722599	chr15:45722598-45722599	C15orf48, MIR147B,	1	1
cg10864878	NA	0	0	1	0	1	NA	0	0	0	NA	0	0	NA	NA	0	0	0	NA	NA	0	0	0	1	0	0	0	NA	0	0	0	NA	NA	3	chr15	47477004	47477005	chr15:47477004-47477005	SEMA6D,	1	0
cg22297146	NA	0	0	1	0	0	NA	0	0	0	NA	0	0	NA	NA	0	0	0	NA	NA	0	0	0	0	0	0	0	NA	0	0	0	NA	NA	1	chr15	48470516	48470517	chr15:48470516-48470517	MYEF2,	0	1
cg04125371	NA	0	0	0	0	1	NA	0	0	0	NA	0	0	NA	NA	0	0	0	NA	NA	0	0	0	1	0	0	1	NA	0	0	0	NA	NA	3	chr15	48937213	48937214	chr15:48937213-48937214	FBN1,	1	0
cg10480343	NA	0	0	0	0	0	NA	0	0	0	NA	0	0	NA	NA	0	0	0	NA	NA	0	0	1	0	0	0	0	NA	0	0	0	NA	NA	1	chr15	48938347	48938348	chr15:48938347-48938348	FBN1,	1	0
cg26158897	NA	0	0	0	0	1	NA	0	0	0	NA	0	0	NA	NA	0	0	0	NA	NA	0	0	0	0	0	0	0	NA	0	0	0	NA	NA	1	chr15	53083135	53083136	chr15:53083135-53083136	ONECUT1,	1	0
cg25902187	NA	0	0	0	0	1	NA	0	0	0	NA	0	0	NA	NA	0	0	0	NA	NA	0	0	0	0	0	0	0	NA	0	0	0	NA	NA	1	chr15	55881044	55881045	chr15:55881044-55881045	PYGO1,	1	0
cg13198321	NA	0	0	0	0	0	NA	0	1	1	NA	0	0	NA	NA	0	0	0	NA	NA	0	0	0	0	0	0	0	NA	0	0	0	NA	NA	2	chr15	58357891	58357892	chr15:58357891-58357892	ALDH1A2,	1	0
cg25489866	NA	0	0	0	0	0	NA	0	0	0	NA	0	0	NA	NA	0	0	0	NA	NA	0	0	1	0	0	0	0	NA	0	0	0	NA	NA	1	chr15	59729553	59729554	chr15:59729553-59729554	FAM81A,	1	0
cg03059131	NA	0	0	0	0	1	NA	0	0	0	NA	0	0	NA	NA	0	0	0	NA	NA	0	0	0	0	0	0	0	NA	0	0	0	NA	NA	1	chr15	60296996	60296997	chr15:60296996-60296997	FOXB1,	1	0
cg18866529	NA	0	0	0	0	0	NA	0	0	0	NA	0	0	NA	NA	0	0	0	NA	NA	0	0	0	0	0	1	0	NA	0	0	0	NA	NA	1	chr15	62359103	62359104	chr15:62359103-62359104	C2CD4A, LOC101928907,	1	1
cg14855334	NA	0	0	0	0	0	NA	0	0	0	NA	0	0	NA	NA	0	0	0	NA	NA	0	0	1	0	0	0	0	NA	0	0	0	NA	NA	1	chr15	74658553	74658554	chr15:74658553-74658554	CYP11A1,	1	0
cg07573209	NA	0	0	0	1	0	NA	0	0	0	NA	0	0	NA	NA	0	0	1	NA	NA	0	0	0	0	0	0	0	NA	0	0	0	NA	NA	2	chr15	76630095	76630096	chr15:76630095-76630096	ISL2,	1	0
cg17507573	NA	0	0	0	0	1	NA	0	0	0	NA	0	0	NA	NA	0	0	0	NA	NA	0	0	0	1	0	0	0	NA	0	0	0	NA	NA	2	chr15	79382998	79382999	chr15:79382998-79382999	RASGRF1,	1	0
cg00544449	NA	0	0	0	0	1	NA	0	0	0	NA	0	0	NA	NA	0	0	0	NA	NA	0	0	0	0	0	0	0	NA	0	0	0	NA	NA	1	chr15	79724802	79724803	chr15:79724802-79724803	KIAA1024,	1	0
cg22435300	NA	0	0	1	0	0	NA	0	0	0	NA	0	0	NA	NA	0	0	0	NA	NA	0	0	0	0	0	0	0	NA	0	0	0	NA	NA	1	chr15	82555336	82555337	chr15:82555336-82555337	SAXO2,	0	1
cg04184836	NA	0	0	0	0	1	NA	0	0	0	NA	0	0	NA	NA	0	0	0	NA	NA	0	0	0	0	0	0	0	NA	0	0	0	NA	NA	1	chr15	83316640	83316641	chr15:83316640-83316641	CPEB1, CPEB1-AS1,	1	1
cg11167100	NA	0	0	0	0	1	NA	0	0	0	NA	0	0	NA	NA	0	0	0	NA	NA	0	0	0	1	0	0	0	NA	0	0	0	NA	NA	2	chr15	83776269	83776270	chr15:83776269-83776270	TM6SF1,	1	0
cg27648738	NA	0	0	0	0	1	NA	0	0	0	NA	0	0	NA	NA	0	0	0	NA	NA	0	0	0	1	0	0	0	NA	0	0	0	NA	NA	2	chr15	84115811	84115812	chr15:84115811-84115812	SH3GL3,	1	1
cg07252731	NA	0	0	0	0	1	NA	0	0	0	NA	0	0	NA	NA	0	0	0	NA	NA	0	0	0	0	0	0	0	NA	0	0	0	NA	NA	1	chr15	88799999	88800000	chr15:88799999-88800000	NTRK3-AS1,	1	1
cg11108676	NA	0	0	0	0	0	NA	0	0	0	NA	0	0	NA	NA	0	0	0	NA	NA	0	0	0	1	0	0	0	NA	0	0	0	NA	NA	1	chr15	88801004	88801005	chr15:88801004-88801005	NTRK3-AS1,	1	1
cg08348496	NA	0	0	0	0	0	NA	0	0	0	NA	0	0	NA	NA	0	0	0	NA	NA	0	0	1	0	0	0	0	NA	0	0	0	NA	NA	1	chr15	89438671	89438672	chr15:89438671-89438672	HAPLN3,	0	0
cg08769966	NA	0	0	0	0	1	NA	0	0	0	NA	0	0	NA	NA	0	0	0	NA	NA	0	0	0	0	0	0	0	NA	0	0	0	NA	NA	1	chr15	92937735	92937736	chr15:92937735-92937736	ST8SIA2,	1	0
cg01950845	NA	0	0	0	0	1	NA	0	0	0	NA	0	0	NA	NA	0	0	0	NA	NA	0	0	0	1	0	0	0	NA	0	0	0	NA	NA	2	chr15	93632730	93632731	chr15:93632730-93632731	RGMA,	1	0
cg06319822	NA	0	0	0	0	1	NA	0	0	0	NA	0	0	NA	NA	0	0	0	NA	NA	0	0	0	0	0	0	0	NA	0	0	0	NA	NA	1	chr16	215960	215961	chr16:215960-215961	HBM,	1	0
cg09874822	NA	0	0	1	0	0	NA	0	0	0	NA	0	0	NA	NA	0	0	0	NA	NA	0	0	0	0	0	0	0	NA	0	0	0	NA	NA	1	chr16	1203997	1203998	chr16:1203997-1203998	CACNA1H,	0	0
cg27616661	NA	0	0	0	0	1	NA	0	0	0	NA	0	0	NA	NA	0	0	0	NA	NA	0	0	0	1	0	0	0	NA	0	0	0	NA	NA	2	chr16	2040981	2040982	chr16:2040981-2040982	SYNGR3,	1	0
cg02230017	NA	0	0	1	0	0	NA	0	0	1	NA	0	0	NA	NA	0	0	0	NA	NA	0	0	0	0	0	0	0	NA	0	0	1	NA	NA	3	chr16	6069019	6069020	chr16:6069019-6069020	RBFOX1,	1	0
cg00853103	NA	0	0	1	0	0	NA	0	0	0	NA	0	0	NA	NA	0	0	0	NA	NA	0	0	0	1	0	0	0	NA	0	0	0	NA	NA	2	chr16	6533789	6533790	chr16:6533789-6533790	RBFOX1,	1	0
cg27199384	NA	0	0	1	0	0	NA	0	0	0	NA	0	0	NA	NA	0	0	0	NA	NA	0	0	0	0	0	0	0	NA	0	0	0	NA	NA	1	chr16	7354041	7354042	chr16:7354041-7354042	RBFOX1,	1	0
cg04933990	NA	0	0	1	0	1	NA	0	0	0	NA	0	0	NA	NA	0	0	0	NA	NA	0	0	0	0	0	0	0	NA	0	0	0	NA	NA	2	chr16	10133501	10133502	chr16:10133501-10133502	GRIN2A,	0	0
cg16368442	NA	0	0	0	0	1	NA	0	0	0	NA	0	0	NA	NA	0	0	0	NA	NA	0	0	0	1	0	0	0	NA	0	0	0	NA	NA	2	chr16	10276799	10276800	chr16:10276799-10276800	GRIN2A,	1	0
cg05064297	NA	0	0	0	0	0	NA	0	1	0	NA	0	0	NA	NA	0	0	0	NA	NA	0	0	0	0	0	0	0	NA	0	0	0	NA	NA	1	chr16	10479966	10479967	chr16:10479966-10479967	ATF7IP2,	0	1
cg20086208	NA	0	0	1	0	0	NA	0	0	0	NA	0	0	NA	NA	0	0	0	NA	NA	0	0	0	0	0	0	0	NA	0	0	0	NA	NA	1	chr16	20085214	20085215	chr16:20085214-20085215	GPR139,	1	0
cg03306374	NA	0	0	0	0	0	NA	0	0	0	NA	0	0	NA	NA	0	0	0	NA	NA	1	0	1	0	0	0	0	NA	0	0	0	NA	NA	2	chr16	23847325	23847326	chr16:23847325-23847326	PRKCB,	1	0
cg03217795	NA	0	1	0	1	0	NA	0	1	0	NA	0	0	NA	NA	0	0	0	NA	NA	0	0	0	0	0	0	0	NA	0	0	0	NA	NA	3	chr16	23847556	23847557	chr16:23847556-23847557	PRKCB,	1	0
cg09507526	NA	0	0	0	0	0	NA	0	0	0	NA	0	0	NA	NA	0	0	0	NA	NA	0	0	0	0	0	0	1	NA	0	0	0	NA	NA	1	chr16	23847816	23847817	chr16:23847816-23847817	PRKCB,	1	0
cg21370856	NA	0	0	1	0	1	NA	0	0	0	NA	0	0	NA	NA	0	0	0	NA	NA	0	0	0	0	0	0	0	NA	0	0	0	NA	NA	2	chr16	23848003	23848004	chr16:23848003-23848004	PRKCB,	1	0
cg03394150	NA	0	0	0	0	1	NA	0	0	0	NA	0	0	NA	NA	0	0	0	NA	NA	0	0	0	1	0	0	0	NA	0	0	0	NA	NA	2	chr16	28074384	28074385	chr16:28074384-28074385	GSG1L,	1	0
cg02043600	NA	0	0	0	0	1	NA	0	0	0	NA	0	0	NA	NA	0	0	0	NA	NA	0	0	0	0	0	0	0	NA	0	0	0	NA	NA	1	chr16	31021933	31021934	chr16:31021933-31021934	STX1B,	0	0
cg01317772	NA	0	0	0	0	0	NA	0	0	0	NA	0	0	NA	NA	0	0	0	NA	NA	0	0	0	0	0	1	0	NA	0	0	0	NA	NA	1	chr16	55405200	55405201	chr16:55405200-55405201	,	0	0
cg01277542	NA	0	0	0	0	1	NA	0	0	0	NA	0	0	NA	NA	0	0	0	NA	NA	0	0	0	1	0	0	0	NA	0	0	0	NA	NA	2	chr16	55689901	55689902	chr16:55689901-55689902	SLC6A2,	1	0
cg00866976	NA	0	0	0	0	0	NA	0	0	0	NA	0	0	NA	NA	0	0	0	NA	NA	0	0	0	1	0	0	0	NA	0	0	0	NA	NA	1	chr16	56224782	56224783	chr16:56224782-56224783	LOC283856,	1	1
cg10273340	NA	0	0	0	0	1	NA	0	0	0	NA	0	0	NA	NA	0	0	0	NA	NA	0	0	0	0	0	0	0	NA	0	0	0	NA	NA	1	chr16	56224793	56224794	chr16:56224793-56224794	LOC283856,	1	1
cg07700514	NA	0	0	1	0	1	NA	0	0	0	NA	0	0	NA	NA	0	0	0	NA	NA	0	0	0	1	0	0	0	NA	0	0	0	NA	NA	3	chr16	56228467	56228468	chr16:56228467-56228468	GNAO1,	1	0
cg06650115	NA	0	0	0	0	1	NA	0	0	0	NA	0	0	NA	NA	0	0	0	NA	NA	0	0	0	0	0	0	0	NA	0	0	0	NA	NA	1	chr16	58498585	58498586	chr16:58498585-58498586	NDRG4,	1	0
cg06537680	NA	0	0	0	0	0	NA	0	0	0	NA	0	0	NA	NA	0	0	0	NA	NA	0	0	1	0	0	0	0	NA	0	0	0	NA	NA	1	chr16	67204316	67204317	chr16:67204316-67204317	HSF4, NOL3,	1	0
cg02367850	NA	0	0	0	0	0	NA	0	1	0	NA	0	0	NA	NA	0	0	0	NA	NA	0	0	0	0	0	0	0	NA	0	0	0	NA	NA	1	chr16	68273877	68273878	chr16:68273877-68273878	ESRP2,	0	0
cg09918510	NA	0	0	1	0	0	NA	0	0	0	NA	0	0	NA	NA	0	0	0	NA	NA	0	0	0	0	0	0	0	NA	0	0	0	NA	NA	1	chr16	71264579	71264580	chr16:71264579-71264580	HYDIN,	0	0
cg03238797	NA	0	0	0	0	0	NA	0	0	1	NA	0	0	NA	NA	0	0	0	NA	NA	0	0	0	0	0	0	0	NA	0	0	0	NA	NA	1	chr16	77468893	77468894	chr16:77468893-77468894	ADAMTS18,	1	0
cg07821427	NA	0	0	1	0	1	NA	0	0	0	NA	0	0	NA	NA	0	0	0	NA	NA	0	0	0	0	0	0	0	NA	0	0	0	NA	NA	2	chr16	77822419	77822420	chr16:77822419-77822420	VAT1L,	1	0
cg05374412	NA	0	0	0	0	0	NA	0	0	0	NA	0	0	NA	NA	0	0	0	NA	NA	0	0	0	1	0	0	0	NA	0	0	0	NA	NA	1	chr16	82660727	82660728	chr16:82660727-82660728	CDH13,	1	0
cg26970841	NA	0	0	0	0	0	NA	0	1	0	NA	0	0	NA	NA	0	0	0	NA	NA	0	0	0	0	0	0	0	NA	0	0	0	NA	NA	1	chr16	85932666	85932667	chr16:85932666-85932667	IRF8,	1	0
cg03978375	NA	0	0	0	0	0	NA	0	0	1	NA	0	0	NA	NA	0	0	0	NA	NA	0	0	0	0	0	0	0	NA	0	0	0	NA	NA	1	chr16	85932668	85932669	chr16:85932668-85932669	IRF8,	1	0
cg08501426	NA	0	0	1	0	0	NA	0	0	0	NA	0	0	NA	NA	0	0	0	NA	NA	0	0	0	0	0	0	0	NA	0	0	0	NA	NA	1	chr16	86320489	86320490	chr16:86320489-86320490	LINC02135,	1	1
cg09552213	NA	0	0	0	0	1	NA	0	0	0	NA	0	0	NA	NA	0	0	0	NA	NA	0	0	0	1	0	0	0	NA	0	0	0	NA	NA	2	chr16	87636782	87636783	chr16:87636782-87636783	JPH3,	1	1
cg11424456	NA	0	0	0	0	0	NA	0	0	0	NA	0	0	NA	NA	0	0	0	NA	NA	0	0	1	0	0	0	0	NA	0	0	0	NA	NA	1	chr17	1131878	1131879	chr17:1131878-1131879	ABR,	1	0
cg03838635	NA	0	0	0	0	0	NA	0	0	0	NA	0	0	NA	NA	0	0	0	NA	NA	0	1	0	0	0	0	0	NA	0	0	0	NA	NA	1	chr17	2628322	2628323	chr17:2628322-2628323	,	0	0
cg12146546	NA	0	0	0	0	0	NA	0	0	0	NA	0	0	NA	NA	0	0	0	NA	NA	0	0	0	1	0	0	0	NA	0	0	0	NA	NA	1	chr17	6616883	6616884	chr17:6616883-6616884	SLC13A5,	1	0
cg05562381	NA	0	0	0	0	1	NA	0	0	0	NA	0	0	NA	NA	0	0	0	NA	NA	0	0	1	0	0	0	0	NA	0	0	0	NA	NA	2	chr17	8230350	8230351	chr17:8230350-8230351	ARHGEF15,	1	0
cg24371075	NA	0	0	0	0	1	NA	0	0	0	NA	0	0	NA	NA	0	0	0	NA	NA	0	0	0	0	0	0	0	NA	0	0	0	NA	NA	1	chr17	8533391	8533392	chr17:8533391-8533392	MYH10,	0	0
cg16918989	NA	0	0	0	0	1	NA	0	0	0	NA	0	0	NA	NA	0	0	0	NA	NA	0	0	0	0	0	0	0	NA	0	0	0	NA	NA	1	chr17	8869213	8869214	chr17:8869213-8869214	PIK3R5,	1	0
cg16202470	NA	0	0	0	0	1	NA	0	0	0	NA	0	0	NA	NA	0	0	0	NA	NA	0	0	0	1	0	0	0	NA	0	0	0	NA	NA	2	chr17	8907213	8907214	chr17:8907213-8907214	,	1	0
cg25116216	NA	0	0	0	0	1	NA	0	0	0	NA	0	0	NA	NA	0	0	0	NA	NA	0	0	0	1	0	0	0	NA	0	0	0	NA	NA	2	chr17	10101581	10101582	chr17:10101581-10101582	GAS7,	1	0
cg21594642	NA	0	0	0	0	0	NA	0	1	0	NA	0	0	NA	NA	0	0	0	NA	NA	0	0	0	0	0	0	0	NA	0	0	0	NA	NA	1	chr17	15466380	15466381	chr17:15466380-15466381	TVP23C, TVP23C-CDRT4,	0	1
cg11501438	NA	0	0	1	0	1	NA	0	0	0	NA	0	0	NA	NA	0	0	0	NA	NA	0	0	0	0	0	0	0	NA	0	0	0	NA	NA	2	chr17	20755949	20755950	chr17:20755949-20755950	,	0	0
cg13874070	NA	0	0	0	0	0	NA	0	0	0	NA	0	0	NA	NA	0	0	0	NA	NA	0	0	0	0	0	1	0	NA	0	0	0	NA	NA	1	chr17	27347053	27347054	chr17:27347053-27347054	,	1	0
cg13204512	NA	0	0	0	0	0	NA	0	0	0	NA	0	0	NA	NA	1	0	0	NA	NA	0	0	0	0	0	0	0	NA	0	0	0	NA	NA	1	chr17	29298184	29298185	chr17:29298184-29298185	RNF135,	0	0
cg05873146	NA	0	0	0	0	0	NA	0	0	0	NA	0	0	NA	NA	0	0	0	NA	NA	0	0	0	0	0	1	0	NA	0	0	0	NA	NA	1	chr17	29335669	29335670	chr17:29335669-29335670	,	0	0
cg02984614	NA	0	0	1	0	0	NA	0	0	0	NA	0	0	NA	NA	0	0	0	NA	NA	0	0	0	0	0	0	0	NA	0	0	0	NA	NA	1	chr17	31618409	31618410	chr17:31618409-31618410	ASIC2,	1	0
cg10451253	NA	0	0	0	0	0	NA	0	0	0	NA	0	0	NA	NA	0	0	0	NA	NA	0	0	0	1	0	0	0	NA	0	0	0	NA	NA	1	chr17	32907705	32907706	chr17:32907705-32907706	C17orf102, TMEM132E,	1	0
cg19651223	NA	0	0	0	0	1	NA	0	0	0	NA	0	0	NA	NA	0	0	0	NA	NA	0	0	0	1	0	0	0	NA	0	0	0	NA	NA	2	chr17	35165844	35165845	chr17:35165844-35165845	,	1	0
cg10043865	NA	0	0	0	1	0	NA	0	0	0	NA	0	0	NA	NA	0	0	0	NA	NA	0	0	0	0	0	0	0	NA	0	0	0	NA	NA	1	chr17	35294481	35294482	chr17:35294481-35294482	LHX1, LOC102723471,	1	1
cg10356613	NA	0	0	0	0	0	NA	0	0	0	NA	0	0	NA	NA	0	1	0	NA	NA	0	0	1	0	0	0	0	NA	0	0	0	NA	NA	2	chr17	35294491	35294492	chr17:35294491-35294492	LHX1, LOC102723471,	1	1
cg03146993	NA	0	0	1	0	0	NA	0	0	0	NA	0	0	NA	NA	0	0	0	NA	NA	0	0	0	0	0	0	0	NA	0	0	0	NA	NA	1	chr17	35297146	35297147	chr17:35297146-35297147	LHX1,	1	0
cg02435495	NA	0	0	0	0	0	NA	0	0	1	NA	0	0	NA	NA	0	0	0	NA	NA	0	0	0	0	0	0	0	NA	0	0	0	NA	NA	1	chr17	36103289	36103290	chr17:36103289-36103290	HNF1B,	1	0
cg18801599	NA	0	0	0	0	0	NA	0	0	0	NA	0	0	NA	NA	0	0	0	NA	NA	0	0	0	0	0	0	0	NA	0	0	1	NA	NA	1	chr17	42092187	42092188	chr17:42092187-42092188	TMEM101,	0	0
cg14458834	NA	0	0	0	1	0	NA	0	0	0	NA	0	0	NA	NA	0	0	0	NA	NA	0	0	0	0	0	0	0	NA	0	0	0	NA	NA	1	chr17	46655394	46655395	chr17:46655394-46655395	HOXB3, HOXB4,	1	0
cg08089301	NA	0	0	0	0	0	NA	0	0	0	NA	0	0	NA	NA	0	1	0	NA	NA	0	0	0	0	0	0	0	NA	0	0	0	NA	NA	1	chr17	46655561	46655562	chr17:46655561-46655562	HOXB3, HOXB4,	1	0
cg08151857	NA	0	0	0	0	0	NA	0	0	0	NA	0	0	NA	NA	0	0	1	NA	NA	0	0	0	0	0	0	0	NA	0	0	0	NA	NA	1	chr17	46691820	46691821	chr17:46691820-46691821	HOXB8,	1	0
cg01469027	NA	0	0	1	0	0	NA	0	0	0	NA	0	0	NA	NA	0	0	0	NA	NA	0	0	0	0	0	0	0	NA	0	0	0	NA	NA	1	chr17	46714130	46714131	chr17:46714130-46714131	MIR196A1,	1	1
cg18087672	NA	0	0	0	0	0	NA	1	0	1	NA	0	0	NA	NA	0	0	0	NA	NA	0	0	0	0	0	0	0	NA	0	0	0	NA	NA	2	chr17	46824915	46824916	chr17:46824915-46824916	,	1	0
cg05452524	NA	0	0	0	0	0	NA	0	0	0	NA	0	0	NA	NA	0	0	0	NA	NA	0	0	1	0	0	0	0	NA	0	0	0	NA	NA	1	chr17	53343029	53343030	chr17:53343029-53343030	HLF,	1	0
cg14598327	NA	0	0	0	0	1	NA	0	0	0	NA	0	0	NA	NA	0	0	0	NA	NA	0	0	0	0	0	0	0	NA	0	0	0	NA	NA	1	chr17	54675137	54675138	chr17:54675137-54675138	NOG,	1	0
cg09695735	NA	0	0	0	0	0	NA	0	0	0	NA	0	0	NA	NA	0	0	0	NA	NA	0	0	0	0	0	0	0	NA	0	0	1	NA	NA	1	chr17	58498977	58498978	chr17:58498977-58498978	C17orf64,	0	0
cg02081266	NA	0	0	1	0	0	NA	0	0	1	NA	0	0	NA	NA	0	0	1	NA	NA	0	0	0	0	0	0	0	NA	0	0	0	NA	NA	3	chr17	59529618	59529619	chr17:59529618-59529619	TBX4,	1	0
cg13213923	NA	0	0	0	0	0	NA	0	0	0	NA	0	0	NA	NA	0	0	0	NA	NA	0	0	1	0	0	0	0	NA	0	0	0	NA	NA	1	chr17	60885491	60885492	chr17:60885491-60885492	MARCH10,	0	0
cg09920557	NA	0	0	0	0	0	NA	0	0	0	NA	0	0	NA	NA	0	0	0	NA	NA	0	0	1	0	0	0	0	NA	0	0	0	NA	NA	1	chr17	61553938	61553939	chr17:61553938-61553939	ACE,	1	0
cg18944047	NA	1	0	1	0	0	NA	1	0	1	NA	0	0	NA	NA	0	0	0	NA	NA	0	0	0	0	0	0	0	NA	0	0	0	NA	NA	4	chr17	72322143	72322144	chr17:72322143-72322144	KIF19,	1	0
cg11122493	NA	0	0	0	0	0	NA	0	0	0	NA	0	0	NA	NA	0	0	0	NA	NA	0	0	1	0	0	0	0	NA	0	0	0	NA	NA	1	chr17	74706551	74706552	chr17:74706551-74706552	MXRA7,	1	0
cg00654814	NA	0	0	0	0	1	NA	0	0	0	NA	0	0	NA	NA	0	0	0	NA	NA	0	0	0	0	0	0	0	NA	0	0	0	NA	NA	1	chr17	74865068	74865069	chr17:74865068-74865069	MGAT5B,	1	0
cg06848185	NA	0	0	0	0	0	NA	0	0	0	NA	0	0	NA	NA	0	0	0	NA	NA	0	0	0	1	0	0	0	NA	0	0	0	NA	NA	1	chr17	75368902	75368903	chr17:75368902-75368903	SEPT9,	0	0
cg17300544	NA	0	0	0	0	1	NA	0	0	1	NA	0	0	NA	NA	0	0	0	NA	NA	0	0	0	0	0	0	0	NA	0	0	0	NA	NA	2	chr17	75369091	75369092	chr17:75369091-75369092	SEPT9,	0	0
cg27591450	NA	0	0	0	0	1	NA	0	0	0	NA	0	0	NA	NA	0	0	0	NA	NA	0	0	0	0	0	0	0	NA	0	0	0	NA	NA	1	chr17	75525004	75525005	chr17:75525004-75525005	,	1	0
cg09236176	NA	0	0	1	0	0	NA	0	0	0	NA	0	0	NA	NA	0	0	0	NA	NA	0	0	0	0	0	0	0	NA	0	0	0	NA	NA	1	chr17	77179455	77179456	chr17:77179455-77179456	RBFOX3,	1	0
cg10362542	NA	0	0	0	0	1	NA	0	0	0	NA	0	0	NA	NA	0	0	0	NA	NA	0	0	0	0	0	0	0	NA	0	0	0	NA	NA	1	chr17	77179709	77179710	chr17:77179709-77179710	RBFOX3,	1	0
cg12865552	NA	0	0	0	0	1	NA	0	0	0	NA	0	0	NA	NA	0	0	0	NA	NA	0	0	0	1	0	0	0	NA	0	0	0	NA	NA	2	chr17	77721631	77721632	chr17:77721631-77721632	,	1	0
cg14409414	NA	0	0	0	0	1	NA	0	0	0	NA	0	0	NA	NA	0	0	0	NA	NA	0	0	0	0	0	0	0	NA	0	0	0	NA	NA	1	chr17	77777649	77777650	chr17:77777649-77777650	,	1	0
cg14129397	NA	0	0	0	0	1	NA	0	0	0	NA	0	0	NA	NA	0	0	0	NA	NA	0	0	0	0	0	0	0	NA	0	0	0	NA	NA	1	chr17	78451961	78451962	chr17:78451961-78451962	NPTX1,	1	0
cg24287438	NA	0	0	0	0	1	NA	0	0	0	NA	0	0	NA	NA	0	0	0	NA	NA	0	0	0	0	0	0	0	NA	0	0	0	NA	NA	1	chr18	904878	904879	chr18:904878-904879	ADCYAP1,	1	0
cg21438101	NA	0	0	1	0	0	NA	0	0	0	NA	0	0	NA	NA	0	0	0	NA	NA	0	0	0	0	0	0	0	NA	0	0	0	NA	NA	1	chr18	904885	904886	chr18:904885-904886	ADCYAP1,	1	0
cg03152033	NA	0	0	1	0	1	NA	0	0	0	NA	0	0	NA	NA	0	0	0	NA	NA	0	0	0	0	0	0	0	NA	0	0	0	NA	NA	2	chr18	4453856	4453857	chr18:4453856-4453857	DLGAP1,	0	0
cg03278146	NA	0	0	1	0	0	NA	0	0	1	NA	0	0	NA	NA	0	0	0	NA	NA	0	0	0	0	0	0	0	NA	0	0	0	NA	NA	2	chr18	5197327	5197328	chr18:5197327-5197328	AKAIN1,	1	0
cg23564700	NA	0	0	1	0	0	NA	0	0	0	NA	0	0	NA	NA	0	0	0	NA	NA	0	0	0	0	0	0	0	NA	0	0	0	NA	NA	1	chr18	5544169	5544170	chr18:5544169-5544170	EPB41L3,	0	0
cg24496223	NA	0	0	1	0	0	NA	0	0	0	NA	0	0	NA	NA	0	0	0	NA	NA	0	0	0	0	0	0	0	NA	0	0	0	NA	NA	1	chr18	5629371	5629372	chr18:5629371-5629372	EPB41L3,	1	0
cg24973298	NA	0	0	0	0	1	NA	0	0	0	NA	0	0	NA	NA	0	0	0	NA	NA	0	0	0	1	0	0	0	NA	0	0	0	NA	NA	2	chr18	7568539	7568540	chr18:7568539-7568540	PTPRM,	1	0
cg06711831	NA	0	0	1	0	1	NA	0	1	0	NA	0	0	NA	NA	0	0	0	NA	NA	0	0	0	0	0	0	0	NA	0	0	0	NA	NA	3	chr18	18821913	18821914	chr18:18821913-18821914	GREB1L,	1	0
cg21678445	NA	1	0	1	0	1	NA	0	0	0	NA	0	0	NA	NA	0	0	0	NA	NA	0	0	0	1	0	0	0	NA	0	0	0	NA	NA	4	chr18	22930283	22930284	chr18:22930283-22930284	ZNF521,	1	0
cg12208258	NA	0	0	0	0	1	NA	0	0	0	NA	0	0	NA	NA	0	0	0	NA	NA	0	0	0	1	0	0	0	NA	0	0	0	NA	NA	2	chr18	25757438	25757439	chr18:25757438-25757439	CDH2,	1	0
cg10794285	NA	0	0	0	0	0	NA	0	0	0	NA	0	0	NA	NA	0	0	0	NA	NA	0	0	0	0	0	0	0	NA	0	0	1	NA	NA	1	chr18	28622024	28622025	chr18:28622024-28622025	DSC3,	1	0
cg05994094	NA	0	0	1	0	1	NA	0	0	0	NA	0	0	NA	NA	0	0	0	NA	NA	0	0	0	1	0	0	0	NA	0	0	0	NA	NA	3	chr18	31020806	31020807	chr18:31020806-31020807	CCDC178,	0	0
cg03045425	NA	0	0	1	0	0	NA	0	0	0	NA	0	0	NA	NA	0	0	0	NA	NA	0	0	0	0	0	0	0	NA	0	0	0	NA	NA	1	chr18	31803633	31803634	chr18:31803633-31803634	NOL4,	1	0
cg24692068	NA	0	0	1	0	0	NA	0	0	0	NA	0	0	NA	NA	0	0	0	NA	NA	0	0	0	0	0	0	0	NA	0	0	0	NA	NA	1	chr18	32557882	32557883	chr18:32557882-32557883	MAPRE2,	1	0
cg13382322	NA	0	0	0	0	1	NA	0	0	0	NA	0	0	NA	NA	0	0	0	NA	NA	0	0	0	0	0	0	0	NA	0	0	0	NA	NA	1	chr18	35147090	35147091	chr18:35147090-35147091	CELF4,	1	0
cg11913496	NA	0	0	0	0	1	NA	0	0	0	NA	0	0	NA	NA	0	0	0	NA	NA	0	0	0	0	0	0	0	NA	0	0	0	NA	NA	1	chr18	43914226	43914227	chr18:43914226-43914227	RNF165,	1	1
cg15049968	NA	0	0	1	0	1	NA	0	0	0	NA	0	0	NA	NA	0	0	0	NA	NA	0	0	0	0	0	0	0	NA	0	0	1	NA	NA	3	chr18	44337910	44337911	chr18:44337910-44337911	ST8SIA5,	1	0
cg27233989	NA	0	0	0	1	0	NA	0	0	0	NA	0	0	NA	NA	0	0	0	NA	NA	0	0	0	0	0	0	0	NA	0	0	0	NA	NA	1	chr18	52989155	52989156	chr18:52989155-52989156	TCF4,	0	0
cg15264806	NA	0	0	1	0	0	NA	0	0	0	NA	0	0	NA	NA	0	0	0	NA	NA	0	0	0	0	0	0	0	NA	0	0	0	NA	NA	1	chr18	59000800	59000801	chr18:59000800-59000801	CDH20,	1	0
cg12816979	NA	0	0	0	0	0	NA	0	0	0	NA	0	0	NA	NA	0	0	0	NA	NA	0	0	0	1	0	0	0	NA	0	0	0	NA	NA	1	chr18	59001398	59001399	chr18:59001398-59001399	CDH20,	1	0
cg07980518	NA	0	0	0	0	0	NA	0	0	0	NA	0	0	NA	NA	0	0	0	NA	NA	0	0	1	0	0	0	0	NA	0	0	0	NA	NA	1	chr18	59560394	59560395	chr18:59560394-59560395	RNF152,	1	0
cg24740531	NA	0	0	0	0	0	NA	0	0	0	NA	0	0	NA	NA	0	0	0	NA	NA	0	0	0	0	0	0	1	NA	0	0	0	NA	NA	1	chr18	60985732	60985733	chr18:60985732-60985733	BCL2,	1	0
cg12799689	NA	0	0	1	0	1	NA	0	0	1	NA	0	0	NA	NA	0	0	0	NA	NA	0	0	0	1	0	0	0	NA	0	0	0	NA	NA	4	chr18	67067893	67067894	chr18:67067893-67067894	DOK6,	1	0
cg18596362	NA	0	0	1	0	0	NA	0	0	0	NA	0	0	NA	NA	0	0	0	NA	NA	0	0	0	0	0	0	0	NA	0	0	0	NA	NA	1	chr18	70210955	70210956	chr18:70210955-70210956	CBLN2,	1	0
cg15146859	NA	0	0	0	0	1	NA	0	0	0	NA	0	0	NA	NA	0	0	0	NA	NA	0	0	0	0	0	0	0	NA	0	0	0	NA	NA	1	chr18	74961737	74961738	chr18:74961737-74961738	GALR1,	1	0
cg03659519	NA	1	0	0	0	0	NA	0	0	0	NA	0	0	NA	NA	0	0	0	NA	NA	0	0	0	0	0	0	0	NA	0	0	0	NA	NA	1	chr18	74961966	74961967	chr18:74961966-74961967	GALR1,	1	0
cg17911318	NA	0	0	1	0	0	NA	0	0	1	NA	0	0	NA	NA	0	0	0	NA	NA	0	0	0	1	0	0	0	NA	0	0	0	NA	NA	3	chr18	74962000	74962001	chr18:74962000-74962001	GALR1,	1	0
cg11859584	NA	0	0	0	0	1	NA	0	0	0	NA	0	0	NA	NA	0	0	0	NA	NA	0	0	0	1	0	0	0	NA	0	0	0	NA	NA	2	chr19	3361374	3361375	chr19:3361374-3361375	NFIC,	1	0
cg17429382	NA	0	0	0	0	1	NA	0	0	0	NA	0	0	NA	NA	0	0	0	NA	NA	0	0	0	0	0	0	0	NA	0	0	0	NA	NA	1	chr19	3786246	3786247	chr19:3786246-3786247	MATK, MIR1268A,	1	1
cg14993276	NA	0	0	0	0	0	NA	0	0	0	NA	0	0	NA	NA	0	0	0	NA	NA	0	0	1	0	0	0	0	NA	0	0	0	NA	NA	1	chr19	10397642	10397643	chr19:10397642-10397643	ICAM4,	1	0
cg12040486	NA	0	0	1	0	0	NA	0	0	0	NA	0	0	NA	NA	0	0	0	NA	NA	0	0	0	0	0	0	0	NA	0	0	0	NA	NA	1	chr19	11959760	11959761	chr19:11959760-11959761	ZNF439,	0	0
cg11767984	NA	0	0	1	0	1	NA	0	0	0	NA	0	0	NA	NA	0	0	0	NA	NA	0	0	0	0	0	0	0	NA	0	0	0	NA	NA	2	chr19	12203349	12203350	chr19:12203349-12203350	ZNF788,	0	0
cg00875960	NA	0	0	0	0	1	NA	0	0	0	NA	0	0	NA	NA	0	0	0	NA	NA	0	0	0	1	0	0	0	NA	0	0	0	NA	NA	2	chr19	12267308	12267309	chr19:12267308-12267309	ZNF625, ZNF625-ZNF20,	0	1
cg19355186	NA	0	0	1	0	1	NA	1	0	1	NA	0	0	NA	NA	0	0	0	NA	NA	0	0	0	1	0	0	0	NA	0	0	0	NA	NA	5	chr19	12306303	12306304	chr19:12306303-12306304	LOC100289333,	0	1
cg25756435	NA	0	0	0	1	0	NA	0	0	0	NA	0	0	NA	NA	0	0	0	NA	NA	0	0	0	0	0	0	0	NA	0	0	0	NA	NA	1	chr19	12952129	12952130	chr19:12952129-12952130	MAST1,	0	0
cg12092090	NA	0	0	1	0	0	NA	0	0	0	NA	0	0	NA	NA	0	0	0	NA	NA	0	0	0	0	0	0	0	NA	0	0	0	NA	NA	1	chr19	13617584	13617585	chr19:13617584-13617585	CACNA1A,	0	0
cg15967847	NA	0	0	0	0	1	NA	0	0	0	NA	0	0	NA	NA	0	0	0	NA	NA	0	0	0	0	0	0	0	NA	0	0	0	NA	NA	1	chr19	15090746	15090747	chr19:15090746-15090747	SLC1A6,	1	1
cg15233183	NA	0	0	0	0	0	NA	0	0	0	NA	0	0	NA	NA	0	0	0	NA	NA	0	0	1	0	0	0	0	NA	0	0	0	NA	NA	1	chr19	16187102	16187103	chr19:16187102-16187103	TPM4,	0	0
cg15044384	NA	0	0	0	0	1	NA	0	0	0	NA	0	0	NA	NA	0	0	0	NA	NA	0	0	0	1	0	0	0	NA	0	0	0	NA	NA	2	chr19	18118666	18118667	chr19:18118666-18118667	ARRDC2,	0	0
cg05661139	NA	0	0	1	0	0	NA	0	0	0	NA	0	0	NA	NA	0	0	0	NA	NA	0	0	0	0	0	0	0	NA	0	0	0	NA	NA	1	chr19	20011721	20011722	chr19:20011721-20011722	ZNF93,	0	0
cg22582862	NA	0	0	1	0	0	NA	0	0	1	NA	0	0	NA	NA	0	0	0	NA	NA	0	0	0	0	0	0	0	NA	0	0	0	NA	NA	2	chr19	20162905	20162906	chr19:20162905-20162906	,	0	0
cg11948055	NA	0	0	1	0	0	NA	0	0	0	NA	0	0	NA	NA	0	0	0	NA	NA	0	0	0	0	0	0	0	NA	0	0	0	NA	NA	1	chr19	20748616	20748617	chr19:20748616-20748617	ZNF737,	0	0
cg23216292	NA	0	0	1	0	1	NA	0	0	0	NA	0	0	NA	NA	0	0	0	NA	NA	0	0	0	0	0	0	0	NA	0	0	0	NA	NA	2	chr19	21106053	21106054	chr19:21106053-21106054	ZNF85,	0	1
cg09360501	NA	0	0	1	0	0	NA	0	0	1	NA	0	0	NA	NA	0	0	0	NA	NA	0	0	0	0	0	0	0	NA	0	0	0	NA	NA	2	chr19	22018958	22018959	chr19:22018958-22018959	ZNF43,	0	0
cg07655636	NA	0	0	1	0	1	NA	0	0	1	NA	0	0	NA	NA	0	0	0	NA	NA	0	0	0	1	0	0	0	NA	0	0	0	NA	NA	4	chr19	22034418	22034419	chr19:22034418-22034419	ZNF43,	0	0
cg08301572	NA	0	0	1	0	0	NA	0	0	0	NA	0	0	NA	NA	0	0	0	NA	NA	0	0	0	0	0	0	0	NA	0	0	0	NA	NA	1	chr19	23300243	23300244	chr19:23300243-23300244	ZNF730,	0	0
cg27058257	NA	0	0	0	0	0	NA	0	0	0	NA	0	0	NA	NA	0	0	0	NA	NA	1	0	0	0	0	0	0	NA	0	0	0	NA	NA	1	chr19	30019529	30019530	chr19:30019529-30019530	VSTM2B,	1	0
cg18716164	NA	0	0	1	0	0	NA	0	0	0	NA	0	0	NA	NA	0	0	0	NA	NA	0	0	0	0	0	0	0	NA	0	0	0	NA	NA	1	chr19	30019647	30019648	chr19:30019647-30019648	VSTM2B,	1	0
cg00757082	NA	0	0	1	0	0	NA	0	0	0	NA	0	0	NA	NA	0	0	0	NA	NA	0	0	0	0	0	0	0	NA	0	0	0	NA	NA	1	chr19	30719149	30719150	chr19:30719149-30719150	,	1	0
cg03758150	NA	0	0	1	0	1	NA	0	0	0	NA	0	0	NA	NA	0	0	0	NA	NA	1	0	0	1	0	0	0	NA	0	0	0	NA	NA	4	chr19	30866192	30866193	chr19:30866192-30866193	ZNF536,	1	0
cg25999442	NA	0	0	0	0	0	NA	0	0	0	NA	0	0	NA	NA	0	0	0	NA	NA	1	0	0	0	0	0	0	NA	0	0	0	NA	NA	1	chr19	34113398	34113399	chr19:34113398-34113399	CHST8,	1	0
cg04497176	NA	0	0	0	0	1	NA	0	0	0	NA	0	0	NA	NA	0	0	0	NA	NA	0	0	0	1	0	0	0	NA	0	0	0	NA	NA	2	chr19	34973644	34973645	chr19:34973644-34973645	WTIP,	1	0
cg24724633	NA	0	0	0	0	0	NA	0	0	1	NA	0	0	NA	NA	0	0	0	NA	NA	0	0	0	0	0	0	1	NA	0	0	0	NA	NA	2	chr19	36909413	36909414	chr19:36909413-36909414	ZFP82,	1	0
cg25886284	NA	0	0	0	0	1	NA	0	0	0	NA	0	0	NA	NA	0	0	0	NA	NA	0	0	0	1	0	0	0	NA	0	0	0	NA	NA	2	chr19	36909418	36909419	chr19:36909418-36909419	ZFP82,	1	0
cg00578154	NA	0	0	0	0	1	NA	0	0	0	NA	0	0	NA	NA	0	0	0	NA	NA	0	0	0	1	0	0	0	NA	0	0	0	NA	NA	2	chr19	37288705	37288706	chr19:37288705-37288706	ZNF790-AS1,	0	1
cg15322783	NA	0	0	0	0	1	NA	0	0	0	NA	0	0	NA	NA	0	0	0	NA	NA	0	0	0	0	0	0	0	NA	0	0	0	NA	NA	1	chr19	37407152	37407153	chr19:37407152-37407153	ZNF829,	0	0
cg03060201	NA	0	0	1	0	0	NA	0	0	0	NA	0	0	NA	NA	0	0	0	NA	NA	0	0	0	1	0	0	0	NA	0	0	0	NA	NA	2	chr19	37407374	37407375	chr19:37407374-37407375	ZNF568,	0	0
cg18154014	NA	0	0	0	0	1	NA	0	0	0	NA	0	0	NA	NA	0	0	0	NA	NA	0	0	0	0	0	0	0	NA	0	0	0	NA	NA	1	chr19	37997991	37997992	chr19:37997991-37997992	ZNF793,	0	0
cg25875213	NA	0	0	0	0	0	NA	1	0	1	NA	0	0	NA	NA	0	0	0	NA	NA	0	0	0	0	0	0	0	NA	0	0	0	NA	NA	2	chr19	38183055	38183056	chr19:38183055-38183056	ZNF781,	1	0
cg25324105	NA	0	0	0	1	0	NA	0	0	0	NA	0	0	NA	NA	0	0	0	NA	NA	0	0	0	0	0	0	0	NA	0	0	0	NA	NA	1	chr19	38183259	38183260	chr19:38183259-38183260	ZNF607, ZNF781,	1	0
cg14587524	NA	0	0	1	0	0	NA	0	0	0	NA	0	0	NA	NA	0	0	1	NA	NA	1	0	0	0	0	0	0	NA	0	0	0	NA	NA	3	chr19	38183262	38183263	chr19:38183262-38183263	ZNF607, ZNF781,	1	0
cg13564825	NA	0	0	0	0	0	NA	0	0	0	NA	0	0	NA	NA	1	0	0	NA	NA	0	0	0	0	0	0	0	NA	0	0	0	NA	NA	1	chr19	38747201	38747202	chr19:38747201-38747202	PPP1R14A,	1	0
cg06740600	NA	0	0	1	0	0	NA	0	0	0	NA	0	0	NA	NA	0	0	0	NA	NA	0	0	0	0	0	0	0	NA	0	0	0	NA	NA	1	chr19	38924436	38924437	chr19:38924436-38924437	RYR1,	0	0
cg11957331	NA	0	1	0	0	1	NA	1	0	0	NA	0	0	NA	NA	0	0	0	NA	NA	0	0	0	1	0	0	0	NA	0	0	0	NA	NA	4	chr19	42828156	42828157	chr19:42828156-42828157	TMEM145,	1	0
cg14931230	NA	0	0	0	0	0	NA	0	0	0	NA	0	0	NA	NA	0	0	0	NA	NA	0	0	0	0	0	0	0	NA	0	0	1	NA	NA	1	chr19	44324901	44324902	chr19:44324901-44324902	LYPD5,	0	0
cg03241649	NA	0	0	1	0	0	NA	0	0	0	NA	0	0	NA	NA	0	0	0	NA	NA	0	0	0	0	0	0	0	NA	0	0	1	NA	NA	2	chr19	44405924	44405925	chr19:44405924-44405925	LOC100505715,	0	1
cg18832632	NA	0	0	1	0	0	NA	0	0	0	NA	0	0	NA	NA	0	0	0	NA	NA	0	0	0	0	0	0	0	NA	0	0	0	NA	NA	1	chr19	44905782	44905783	chr19:44905782-44905783	ZNF285,	0	0
cg13498858	NA	0	0	0	0	1	NA	0	0	0	NA	0	0	NA	NA	0	0	0	NA	NA	0	0	0	1	0	0	0	NA	0	0	0	NA	NA	2	chr19	44952618	44952619	chr19:44952618-44952619	ZNF229,	0	1
cg14056357	NA	0	0	1	0	0	NA	0	0	0	NA	0	0	NA	NA	0	0	0	NA	NA	0	0	0	0	0	0	0	NA	0	0	1	NA	NA	2	chr19	44952665	44952666	chr19:44952665-44952666	ZNF229,	0	1
cg02879662	NA	0	0	0	0	0	NA	0	0	0	NA	0	0	NA	NA	0	0	0	NA	NA	0	0	1	0	0	0	0	NA	0	0	0	NA	NA	1	chr19	46800467	46800468	chr19:46800467-46800468	HIF3A,	0	0
cg17296166	NA	0	0	0	0	0	NA	1	0	0	NA	0	0	NA	NA	0	0	0	NA	NA	0	0	0	1	0	0	0	NA	0	0	0	NA	NA	2	chr19	46974567	46974568	chr19:46974567-46974568	PNMA8A,	0	0
cg10788735	NA	0	0	0	0	0	NA	0	0	1	NA	0	0	NA	NA	0	0	0	NA	NA	0	0	0	0	0	0	0	NA	0	0	0	NA	NA	1	chr19	46974886	46974887	chr19:46974886-46974887	PNMA8A,	0	0
cg17787159	NA	0	0	0	0	1	NA	0	0	0	NA	0	0	NA	NA	0	0	0	NA	NA	0	0	0	0	0	0	0	NA	0	0	0	NA	NA	1	chr19	46974908	46974909	chr19:46974908-46974909	PNMA8A,	0	0
cg04781584	NA	0	0	0	0	0	NA	0	0	1	NA	0	0	NA	NA	0	0	0	NA	NA	0	0	0	0	0	0	0	NA	0	0	0	NA	NA	1	chr19	49646146	49646147	chr19:49646146-49646147	PPFIA3,	0	1
cg13861524	NA	0	0	0	0	0	NA	0	0	0	NA	0	0	NA	NA	0	0	0	NA	NA	0	0	0	0	0	0	0	NA	0	0	1	NA	NA	1	chr19	50836391	50836392	chr19:50836391-50836392	KCNC3,	0	1
cg17355294	NA	0	0	0	0	0	NA	0	0	0	NA	0	0	NA	NA	0	0	0	NA	NA	0	0	1	0	0	0	0	NA	0	0	0	NA	NA	1	chr19	51416098	51416099	chr19:51416098-51416099	KLK4,	1	1
cg04772683	NA	0	0	0	0	0	NA	0	0	0	NA	0	0	NA	NA	0	0	0	NA	NA	0	0	1	0	0	0	0	NA	0	0	0	NA	NA	1	chr19	51522641	51522642	chr19:51522641-51522642	KLK10,	1	0
cg00745399	NA	0	0	0	0	0	NA	1	0	1	NA	0	0	NA	NA	0	0	0	NA	NA	0	0	0	0	0	0	0	NA	0	0	0	NA	NA	2	chr19	52839924	52839925	chr19:52839924-52839925	ZNF610,	0	0
cg17700915	NA	0	0	1	0	0	NA	0	0	0	NA	0	0	NA	NA	0	0	0	NA	NA	0	0	0	0	0	0	0	NA	0	0	0	NA	NA	1	chr19	52840042	52840043	chr19:52840042-52840043	ZNF610,	0	0
cg13393110	NA	0	0	1	0	0	NA	0	0	0	NA	0	0	NA	NA	0	0	0	NA	NA	0	0	0	0	0	0	0	NA	0	0	0	NA	NA	1	chr19	52873106	52873107	chr19:52873106-52873107	ZNF610, ZNF880,	0	0
cg27258025	NA	0	0	1	0	0	NA	0	0	0	NA	0	0	NA	NA	0	0	0	NA	NA	0	0	0	0	0	0	0	NA	0	0	0	NA	NA	1	chr19	52900974	52900975	chr19:52900974-52900975	ZNF528-AS1,	0	1
cg03091337	NA	0	0	0	0	1	NA	0	0	0	NA	0	0	NA	NA	0	0	0	NA	NA	0	0	0	0	0	0	0	NA	0	0	0	NA	NA	1	chr19	52901124	52901125	chr19:52901124-52901125	ZNF528,	0	0
cg07528613	NA	0	0	1	0	0	NA	0	0	0	NA	0	0	NA	NA	0	0	0	NA	NA	0	0	0	0	0	0	0	NA	0	0	0	NA	NA	1	chr19	53073404	53073405	chr19:53073404-53073405	ZNF701,	0	0
cg12003318	NA	0	0	0	0	0	NA	0	0	1	NA	0	0	NA	NA	0	0	0	NA	NA	0	0	0	0	0	0	0	NA	0	0	0	NA	NA	1	chr19	53073865	53073866	chr19:53073865-53073866	ZNF701,	0	0
cg15202738	NA	0	0	1	0	1	NA	1	0	1	NA	0	0	NA	NA	0	0	0	NA	NA	0	0	0	0	0	0	0	NA	0	0	0	NA	NA	4	chr19	53636108	53636109	chr19:53636108-53636109	ZNF415,	0	0
cg01620580	NA	0	0	0	0	0	NA	0	0	1	NA	0	0	NA	NA	0	0	0	NA	NA	0	0	0	0	0	0	0	NA	0	0	0	NA	NA	1	chr19	53696649	53696650	chr19:53696649-53696650	ZNF665,	0	0
cg11332363	NA	0	0	0	0	1	NA	0	0	0	NA	0	0	NA	NA	0	0	0	NA	NA	0	0	0	0	0	0	0	NA	0	0	0	NA	NA	1	chr19	54023999	54024000	chr19:54023999-54024000	ZNF331,	0	0
cg07519873	NA	0	0	1	0	0	NA	0	0	0	NA	0	0	NA	NA	0	0	0	NA	NA	0	0	0	0	0	0	0	NA	0	0	0	NA	NA	1	chr19	54483188	54483189	chr19:54483188-54483189	CACNG8,	0	0
cg20122943	NA	1	0	0	0	0	NA	0	0	0	NA	0	0	NA	NA	0	0	0	NA	NA	0	0	0	0	0	0	0	NA	0	0	0	NA	NA	1	chr19	54483532	54483533	chr19:54483532-54483533	CACNG8,	0	0
cg15241920	NA	0	0	1	0	0	NA	0	0	1	NA	0	0	NA	NA	0	0	0	NA	NA	0	0	0	0	0	0	0	NA	0	0	0	NA	NA	2	chr19	54926514	54926515	chr19:54926514-54926515	TTYH1,	1	0
cg15708153	NA	0	0	1	0	0	NA	1	0	1	NA	0	0	NA	NA	0	0	0	NA	NA	0	0	0	0	0	0	0	NA	0	0	0	NA	NA	3	chr19	56879554	56879555	chr19:56879554-56879555	ZNF542P, ZSCAN5A,	0	1
cg27477373	NA	0	0	0	0	0	NA	0	0	0	NA	0	0	NA	NA	0	0	0	NA	NA	0	0	0	1	0	0	0	NA	0	0	0	NA	NA	1	chr19	56879645	56879646	chr19:56879645-56879646	ZNF542P, ZSCAN5A,	0	1
cg20004406	NA	0	0	0	0	1	NA	0	0	0	NA	0	0	NA	NA	0	0	0	NA	NA	0	0	0	0	0	0	0	NA	0	0	0	NA	NA	1	chr19	56879994	56879995	chr19:56879994-56879995	ZNF542P,	0	1
cg13916740	NA	0	0	1	0	1	NA	1	0	1	NA	0	0	NA	NA	0	0	0	NA	NA	0	0	0	1	0	0	0	NA	0	0	0	NA	NA	5	chr19	56904997	56904998	chr19:56904997-56904998	ZNF582, ZNF582-AS1,	0	1
cg00796360	NA	0	0	1	0	0	NA	0	0	0	NA	0	0	NA	NA	0	0	0	NA	NA	0	0	0	0	0	0	0	NA	0	0	0	NA	NA	1	chr19	56915650	56915651	chr19:56915650-56915651	ZNF583,	0	0
cg14042851	NA	0	0	1	0	1	NA	1	0	0	NA	0	0	NA	NA	0	0	0	NA	NA	0	0	0	1	0	0	0	NA	0	0	0	NA	NA	4	chr19	57019005	57019006	chr19:57019005-57019006	ZNF471,	0	0
cg25963041	NA	0	0	1	0	0	NA	0	0	1	NA	0	0	NA	NA	0	0	0	NA	NA	0	0	0	0	0	0	0	NA	0	0	0	NA	NA	2	chr19	57049777	57049778	chr19:57049777-57049778	ZFP28,	0	0
cg21627760	NA	0	0	0	0	1	NA	0	0	0	NA	0	0	NA	NA	0	0	0	NA	NA	0	0	0	0	0	0	0	NA	0	0	0	NA	NA	1	chr19	57862638	57862639	chr19:57862638-57862639	ZNF304,	0	0
cg22806837	NA	0	0	1	0	0	NA	0	0	0	NA	0	0	NA	NA	0	0	0	NA	NA	0	0	0	0	0	0	0	NA	0	0	0	NA	NA	1	chr19	58011345	58011346	chr19:58011345-58011346	ZNF773,	0	1
cg13644629	NA	0	0	1	0	0	NA	0	0	0	NA	0	0	NA	NA	0	0	0	NA	NA	0	0	0	0	0	0	0	NA	0	0	0	NA	NA	1	chr19	58038742	58038743	chr19:58038742-58038743	ZNF549,	0	0
cg04342092	NA	0	0	1	0	0	NA	1	0	1	NA	0	0	NA	NA	0	0	0	NA	NA	0	0	0	0	0	0	0	NA	0	0	1	NA	NA	4	chr19	58095468	58095469	chr19:58095468-58095469	ZIK1,	0	0
cg23950001	NA	0	0	0	0	1	NA	0	0	0	NA	0	0	NA	NA	0	0	0	NA	NA	0	0	0	1	0	0	0	NA	0	0	0	NA	NA	2	chr19	58126053	58126054	chr19:58126053-58126054	ZNF134,	0	0
cg08048222	NA	0	0	1	0	0	NA	0	0	0	NA	0	0	NA	NA	0	0	0	NA	NA	0	0	0	0	0	0	1	NA	0	0	0	NA	NA	2	chr19	58239012	58239013	chr19:58239012-58239013	ZNF671,	0	0
cg00505277	NA	0	0	1	0	0	NA	0	0	0	NA	0	0	NA	NA	0	0	0	NA	NA	0	0	0	0	0	0	0	NA	0	0	0	NA	NA	1	chr19	58521176	58521177	chr19:58521176-58521177	LOC100128398,	0	1
cg18428688	NA	0	0	1	0	0	NA	0	0	0	NA	0	0	NA	NA	0	0	0	NA	NA	0	0	0	0	0	0	0	NA	0	0	0	NA	NA	1	chr19	58609744	58609745	chr19:58609744-58609745	ZSCAN18,	0	0
cg12042659	NA	0	0	0	0	0	NA	0	0	1	NA	0	0	NA	NA	0	0	0	NA	NA	0	0	0	0	0	0	0	NA	0	0	0	NA	NA	1	chr19	58951599	58951600	chr19:58951599-58951600	ZNF132,	1	0
cg24366702	NA	0	0	1	0	1	NA	1	0	0	NA	0	0	NA	NA	0	0	0	NA	NA	0	0	0	1	0	0	0	NA	0	0	1	NA	NA	5	chr19	58951778	58951779	chr19:58951778-58951779	ZNF132,	1	0
cg14256587	NA	0	0	0	0	1	NA	0	0	0	NA	0	0	NA	NA	0	0	0	NA	NA	0	0	0	1	0	0	0	NA	0	0	0	NA	NA	2	chr2	946010	946011	chr2:946010-946011	LOC101060391,	1	1
cg25181651	NA	1	0	0	0	1	NA	0	0	0	NA	0	0	NA	NA	0	0	0	NA	NA	0	0	0	1	0	0	0	NA	0	0	0	NA	NA	3	chr2	1748132	1748133	chr2:1748132-1748133	PXDN,	1	0
cg09118932	NA	0	0	0	0	0	NA	0	0	0	NA	0	0	NA	NA	0	0	0	NA	NA	1	0	0	0	0	0	0	NA	0	0	0	NA	NA	1	chr2	1748337	1748338	chr2:1748337-1748338	PXDN,	1	0
cg05648183	NA	0	0	0	0	1	NA	0	0	0	NA	0	0	NA	NA	0	0	0	NA	NA	0	0	0	1	0	0	0	NA	0	0	0	NA	NA	2	chr2	7058390	7058391	chr2:7058390-7058391	RNF144A, RNF144A-AS1,	0	1
cg02085210	NA	0	0	0	0	0	NA	0	0	0	NA	0	0	NA	NA	0	0	0	NA	NA	0	0	0	0	0	1	0	NA	0	0	0	NA	NA	1	chr2	10589054	10589055	chr2:10589054-10589055	LOC101929715, ODC1, SNORA80B,	1	1
cg05899618	NA	1	0	0	0	0	NA	0	0	0	NA	0	0	NA	NA	0	0	0	NA	NA	0	0	0	0	0	0	0	NA	0	0	0	NA	NA	1	chr2	20865847	20865848	chr2:20865847-20865848	GDF7,	1	0
cg24563094	NA	0	0	0	0	0	NA	0	0	0	NA	0	0	NA	NA	1	0	0	NA	NA	0	0	0	0	0	0	0	NA	0	0	0	NA	NA	1	chr2	26395458	26395459	chr2:26395458-26395459	GAREM2,	0	0
cg14163665	NA	0	0	0	0	1	NA	0	0	0	NA	0	0	NA	NA	0	0	0	NA	NA	0	0	0	0	0	0	0	NA	0	0	0	NA	NA	1	chr2	30144579	30144580	chr2:30144579-30144580	ALK,	1	0
cg21583226	NA	0	0	0	0	1	NA	0	0	0	NA	0	0	NA	NA	0	0	0	NA	NA	0	0	0	1	0	0	0	NA	0	0	0	NA	NA	2	chr2	31360693	31360694	chr2:31360693-31360694	GALNT14,	1	0
cg12206199	NA	0	0	0	0	0	NA	0	1	0	NA	0	0	NA	NA	1	0	0	NA	NA	0	0	0	0	0	0	0	NA	0	0	0	NA	NA	2	chr2	39187543	39187544	chr2:39187543-39187544	ARHGEF33,	1	0
cg14686012	NA	0	0	0	0	1	NA	0	0	0	NA	0	0	NA	NA	0	0	0	NA	NA	0	0	0	0	0	0	0	NA	0	0	0	NA	NA	1	chr2	40679086	40679087	chr2:40679086-40679087	SLC8A1,	1	0
cg03307465	NA	0	0	1	0	0	NA	0	0	0	NA	0	0	NA	NA	0	0	0	NA	NA	0	0	0	0	0	0	0	NA	0	0	0	NA	NA	1	chr2	40679519	40679520	chr2:40679519-40679520	SLC8A1,	1	0
cg14168530	NA	0	0	1	0	1	NA	1	0	1	NA	0	0	NA	NA	0	0	0	NA	NA	0	0	0	1	0	0	0	NA	0	0	1	NA	NA	6	chr2	45155991	45155992	chr2:45155991-45155992	,	1	0
cg25053336	NA	1	0	0	0	0	NA	0	0	0	NA	0	0	NA	NA	0	0	0	NA	NA	0	0	0	0	0	0	0	NA	0	0	0	NA	NA	1	chr2	45161333	45161334	chr2:45161333-45161334	,	1	0
cg21401879	NA	0	0	1	0	0	NA	0	0	0	NA	0	0	NA	NA	0	0	0	NA	NA	0	0	0	0	0	0	0	NA	0	0	0	NA	NA	1	chr2	45162036	45162037	chr2:45162036-45162037	,	1	0
cg23808946	NA	0	0	1	0	0	NA	0	0	1	NA	0	0	NA	NA	0	0	0	NA	NA	0	0	0	0	0	0	0	NA	0	0	0	NA	NA	2	chr2	45169548	45169549	chr2:45169548-45169549	SIX3,	1	0
cg02711647	NA	0	0	0	0	0	NA	0	0	0	NA	0	0	NA	NA	0	0	0	NA	NA	0	0	1	0	0	0	0	NA	0	0	0	NA	NA	1	chr2	45237689	45237690	chr2:45237689-45237690	SIX2,	1	0
cg03603951	NA	0	0	0	0	1	NA	0	0	0	NA	0	0	NA	NA	0	0	0	NA	NA	0	0	0	1	0	0	0	NA	0	0	0	NA	NA	2	chr2	47797488	47797489	chr2:47797488-47797489	KCNK12,	1	0
cg13913015	NA	0	0	1	0	0	NA	0	0	0	NA	0	0	NA	NA	0	0	0	NA	NA	0	0	0	0	0	0	0	NA	0	0	0	NA	NA	1	chr2	47797963	47797964	chr2:47797963-47797964	KCNK12,	1	0
cg12593303	NA	0	0	0	0	0	NA	0	0	0	NA	0	0	NA	NA	0	0	0	NA	NA	0	0	0	0	0	1	0	NA	0	0	0	NA	NA	1	chr2	54785406	54785407	chr2:54785406-54785407	SPTBN1,	0	0
cg10089527	NA	0	0	0	0	0	NA	0	0	0	NA	0	0	NA	NA	0	0	0	NA	NA	0	0	0	1	0	0	0	NA	0	0	0	NA	NA	1	chr2	66653254	66653255	chr2:66653254-66653255	MEIS1-AS3,	1	1
cg08157672	NA	0	0	0	0	1	NA	0	0	0	NA	0	0	NA	NA	0	0	0	NA	NA	0	0	0	0	0	0	0	NA	0	0	0	NA	NA	1	chr2	68547141	68547142	chr2:68547141-68547142	CNRIP1,	1	0
cg18409528	NA	0	0	1	0	0	NA	0	0	0	NA	0	0	NA	NA	0	0	0	NA	NA	0	0	0	0	0	0	0	NA	0	0	0	NA	NA	1	chr2	74741136	74741137	chr2:74741136-74741137	DQX1, TLX2,	1	0
cg22686854	NA	0	0	1	0	0	NA	0	0	0	NA	0	0	NA	NA	0	0	0	NA	NA	0	0	0	0	0	0	0	NA	0	0	0	NA	NA	1	chr2	79220029	79220030	chr2:79220029-79220030	,	1	0
cg01546568	NA	0	0	1	0	0	NA	0	0	1	NA	0	0	NA	NA	0	0	0	NA	NA	0	0	0	0	0	0	0	NA	0	0	0	NA	NA	2	chr2	79740322	79740323	chr2:79740322-79740323	CTNNA2,	0	0
cg20072442	NA	0	0	1	0	0	NA	1	0	1	NA	0	0	NA	NA	0	0	0	NA	NA	0	0	0	0	0	0	0	NA	0	0	0	NA	NA	3	chr2	80530255	80530256	chr2:80530255-80530256	CTNNA2, LRRTM1,	1	0
cg16838838	NA	0	0	0	0	0	NA	0	0	0	NA	0	0	NA	NA	0	0	0	NA	NA	0	0	0	0	0	1	0	NA	0	0	0	NA	NA	1	chr2	85641023	85641024	chr2:85641023-85641024	CAPG,	0	0
cg09046939	NA	0	0	0	0	0	NA	0	0	0	NA	0	0	NA	NA	0	0	0	NA	NA	0	0	0	1	0	0	0	NA	0	0	0	NA	NA	1	chr2	87017591	87017592	chr2:87017591-87017592	CD8A,	1	1
cg24524352	NA	0	0	1	0	0	NA	0	0	0	NA	0	0	NA	NA	0	0	0	NA	NA	0	0	0	0	0	0	0	NA	0	0	0	NA	NA	1	chr2	95522876	95522877	chr2:95522876-95522877	ANKRD20A8P,	0	1
cg22403344	NA	0	0	0	0	1	NA	0	0	0	NA	0	0	NA	NA	0	0	0	NA	NA	0	0	0	1	0	0	0	NA	0	0	0	NA	NA	2	chr2	95691500	95691501	chr2:95691500-95691501	MAL,	1	0
cg18404308	NA	0	0	1	0	0	NA	0	0	1	NA	0	0	NA	NA	0	0	0	NA	NA	0	0	0	0	0	0	0	NA	0	0	0	NA	NA	2	chr2	98962900	98962901	chr2:98962900-98962901	CNGA3,	1	0
cg10583000	NA	0	0	0	0	1	NA	0	0	0	NA	0	0	NA	NA	0	0	0	NA	NA	0	0	0	0	0	0	0	NA	0	0	0	NA	NA	1	chr2	98963134	98963135	chr2:98963134-98963135	CNGA3,	1	0
cg20727142	NA	0	0	0	0	0	NA	0	0	0	NA	0	0	NA	NA	0	0	0	NA	NA	0	0	0	1	0	0	0	NA	0	0	0	NA	NA	1	chr2	98963408	98963409	chr2:98963408-98963409	CNGA3,	1	0
cg23977631	NA	0	0	0	0	1	NA	0	0	0	NA	0	0	NA	NA	0	0	0	NA	NA	0	0	0	1	0	0	0	NA	0	0	0	NA	NA	2	chr2	100938799	100938800	chr2:100938799-100938800	LONRF2,	1	0
cg12451869	NA	0	0	0	0	0	NA	0	1	0	NA	0	0	NA	NA	0	0	0	NA	NA	0	0	0	0	0	0	0	NA	0	0	0	NA	NA	1	chr2	102867685	102867686	chr2:102867685-102867686	,	1	0
cg08189989	NA	1	1	0	0	1	NA	1	0	0	NA	0	0	NA	NA	0	0	1	NA	NA	0	0	0	1	0	0	0	NA	0	0	1	NA	NA	7	chr2	105459164	105459165	chr2:105459164-105459165	LINC01158,	1	1
cg00001747	NA	0	0	1	0	0	NA	0	0	1	NA	0	0	NA	NA	0	0	0	NA	NA	0	0	0	0	0	0	0	NA	0	0	0	NA	NA	2	chr2	105460263	105460264	chr2:105460263-105460264	LINC01158,	1	1
cg19513834	NA	0	1	1	0	0	NA	0	0	1	NA	0	0	NA	NA	0	0	0	NA	NA	0	0	1	0	0	0	0	NA	0	0	0	NA	NA	4	chr2	105470561	105470562	chr2:105470561-105470562	POU3F3,	1	0
cg11014373	NA	0	0	1	0	0	NA	0	0	0	NA	0	0	NA	NA	0	0	0	NA	NA	0	0	0	0	0	0	0	NA	0	0	0	NA	NA	1	chr2	105479054	105479055	chr2:105479054-105479055	LINC01159, POU3F3,	1	1
cg06499647	NA	0	0	0	0	0	NA	0	0	0	NA	0	0	NA	NA	0	0	0	NA	NA	0	0	0	1	0	0	0	NA	0	0	0	NA	NA	1	chr2	106681983	106681984	chr2:106681983-106681984	C2orf40,	1	0
cg08236767	NA	0	0	1	0	0	NA	0	0	0	NA	0	0	NA	NA	0	0	0	NA	NA	0	0	0	0	0	0	0	NA	0	0	0	NA	NA	1	chr2	107503662	107503663	chr2:107503662-107503663	ST6GAL2,	1	1
cg05311412	NA	0	0	1	0	0	NA	0	0	0	NA	0	0	NA	NA	0	0	0	NA	NA	0	0	0	0	0	0	0	NA	0	0	0	NA	NA	1	chr2	108602906	108602907	chr2:108602906-108602907	SLC5A7,	1	0
cg21678377	NA	0	0	1	0	1	NA	0	0	1	NA	0	0	NA	NA	0	0	0	NA	NA	0	0	0	0	0	0	0	NA	0	0	0	NA	NA	3	chr2	115919009	115919010	chr2:115919009-115919010	DPP10,	1	0
cg01886957	NA	0	0	0	0	0	NA	0	0	0	NA	0	0	NA	NA	0	0	0	NA	NA	0	0	0	1	0	0	0	NA	0	0	0	NA	NA	1	chr2	115920612	115920613	chr2:115920612-115920613	DPP10,	1	0
cg06266613	NA	0	0	0	0	1	NA	0	0	0	NA	0	0	NA	NA	0	0	0	NA	NA	0	0	0	1	0	0	0	NA	0	0	0	NA	NA	2	chr2	119593464	119593465	chr2:119593464-119593465	,	1	0
cg20505223	NA	0	0	1	0	1	NA	0	0	1	NA	0	0	NA	NA	0	0	0	NA	NA	0	0	0	1	0	0	0	NA	0	0	0	NA	NA	4	chr2	120281813	120281814	chr2:120281813-120281814	SCTR,	1	0
cg22830113	NA	0	0	1	0	0	NA	0	0	0	NA	0	0	NA	NA	0	0	0	NA	NA	0	0	0	0	0	0	0	NA	0	0	0	NA	NA	1	chr2	127783168	127783169	chr2:127783168-127783169	,	0	0
cg13024709	NA	0	0	0	0	1	NA	1	0	1	NA	0	0	NA	NA	0	0	0	NA	NA	0	0	0	0	0	0	0	NA	0	0	0	NA	NA	3	chr2	131792772	131792773	chr2:131792772-131792773	ARHGEF4,	1	0
cg07085827	NA	0	0	1	1	0	NA	0	1	0	NA	0	0	NA	NA	0	0	0	NA	NA	0	0	0	0	0	0	0	NA	0	0	0	NA	NA	3	chr2	132121676	132121677	chr2:132121676-132121677	WTH3DI,	0	0
cg19144684	NA	0	0	1	0	0	NA	0	0	0	NA	0	0	NA	NA	0	0	0	NA	NA	0	0	0	0	0	0	0	NA	0	0	0	NA	NA	1	chr2	137522960	137522961	chr2:137522960-137522961	THSD7B,	1	0
cg20443778	NA	0	0	0	0	1	NA	0	0	0	NA	0	0	NA	NA	0	0	0	NA	NA	0	0	0	1	0	0	0	NA	0	0	0	NA	NA	2	chr2	142887886	142887887	chr2:142887886-142887887	LRP1B,	1	0
cg09667303	NA	0	0	0	0	1	NA	0	0	0	NA	0	0	NA	NA	0	0	0	NA	NA	0	0	0	1	0	0	0	NA	0	0	0	NA	NA	2	chr2	144695257	144695258	chr2:144695257-144695258	LOC101928386,	1	1
cg11540007	NA	0	0	0	0	1	NA	0	0	0	NA	0	0	NA	NA	0	0	0	NA	NA	0	0	0	1	0	0	1	NA	0	0	0	NA	NA	3	chr2	145274975	145274976	chr2:145274975-145274976	ZEB2,	1	1
cg16405026	NA	0	0	0	1	1	NA	0	0	0	NA	0	0	NA	NA	0	1	0	NA	NA	0	0	0	0	0	0	1	NA	0	0	0	NA	NA	4	chr2	145281942	145281943	chr2:145281942-145281943	LINC01412, LOC105373656,	1	1
cg19532257	NA	0	0	1	0	0	NA	0	0	0	NA	0	0	NA	NA	0	0	0	NA	NA	0	0	0	0	0	0	0	NA	0	0	0	NA	NA	1	chr2	149634141	149634142	chr2:149634141-149634142	KIF5C,	0	0
cg10664112	NA	0	0	1	0	0	NA	0	0	0	NA	0	0	NA	NA	0	0	0	NA	NA	0	0	0	0	0	0	0	NA	0	0	0	NA	NA	1	chr2	149645559	149645560	chr2:149645559-149645560	KIF5C,	0	0
cg14765646	NA	0	0	1	0	0	NA	0	0	0	NA	0	0	NA	NA	0	0	0	NA	NA	0	0	0	0	0	0	0	NA	0	0	0	NA	NA	1	chr2	154334450	154334451	chr2:154334450-154334451	RPRM,	1	0
cg12079322	NA	0	0	1	1	1	NA	0	0	0	NA	0	0	NA	NA	0	0	0	NA	NA	0	0	0	0	0	0	0	NA	0	0	0	NA	NA	3	chr2	154728468	154728469	chr2:154728468-154728469	GALNT13,	1	0
cg13101087	NA	0	0	0	0	0	NA	0	0	0	NA	0	0	NA	NA	0	0	0	NA	NA	0	0	0	1	0	0	0	NA	0	0	0	NA	NA	1	chr2	154729059	154729060	chr2:154729059-154729060	GALNT13,	1	0
cg23491599	NA	0	0	1	0	0	NA	0	0	0	NA	0	0	NA	NA	0	0	0	NA	NA	0	0	0	0	0	0	0	NA	0	0	0	NA	NA	1	chr2	155554688	155554689	chr2:155554688-155554689	KCNJ3,	1	0
cg11856078	NA	0	0	0	0	0	NA	0	0	0	NA	0	0	NA	NA	0	0	0	NA	NA	0	0	0	0	0	0	0	NA	0	0	1	NA	NA	1	chr2	157178165	157178166	chr2:157178165-157178166	NR4A2,	1	0
cg21949512	NA	0	0	0	0	0	NA	0	1	0	NA	0	0	NA	NA	0	0	0	NA	NA	0	0	0	0	0	0	0	NA	0	0	0	NA	NA	1	chr2	162275468	162275469	chr2:162275468-162275469	TBR1,	1	0
cg06382344	NA	0	1	0	0	0	NA	0	1	0	NA	0	0	NA	NA	1	0	1	NA	NA	0	0	0	0	0	0	0	NA	0	0	0	NA	NA	4	chr2	162280519	162280520	chr2:162280519-162280520	TBR1,	1	0
cg01419831	NA	1	1	1	1	1	NA	0	1	1	NA	0	0	NA	NA	0	1	1	NA	NA	0	0	0	0	0	0	0	NA	0	0	1	NA	NA	10	chr2	162283705	162283706	chr2:162283705-162283706	TBR1,	1	0
cg18892517	NA	0	0	0	0	0	NA	0	0	0	NA	0	0	NA	NA	0	0	0	NA	NA	0	0	0	0	0	1	0	NA	0	0	0	NA	NA	1	chr2	162930244	162930245	chr2:162930244-162930245	DPP4,	1	0
cg20593611	NA	0	0	0	0	1	NA	0	0	0	NA	0	0	NA	NA	0	0	0	NA	NA	0	0	0	0	0	0	0	NA	0	0	0	NA	NA	1	chr2	164593221	164593222	chr2:164593221-164593222	FIGN,	0	0
cg12944197	NA	0	0	1	0	0	NA	0	0	0	NA	0	0	NA	NA	0	0	0	NA	NA	0	0	0	0	0	0	0	NA	0	0	0	NA	NA	1	chr2	168149991	168149992	chr2:168149991-168149992	,	0	0
cg08748100	NA	0	0	1	0	0	NA	0	0	0	NA	0	0	NA	NA	0	0	0	NA	NA	0	0	0	0	0	0	0	NA	0	0	0	NA	NA	1	chr2	173100097	173100098	chr2:173100097-173100098	,	1	0
cg13886334	NA	0	0	0	0	0	NA	0	0	1	NA	0	0	NA	NA	0	0	1	NA	NA	0	0	0	0	0	0	0	NA	0	0	0	NA	NA	2	chr2	175193377	175193378	chr2:175193377-175193378	LINC01305,	1	1
cg08575330	NA	0	0	0	1	0	NA	0	0	0	NA	0	0	NA	NA	0	0	1	NA	NA	0	0	0	0	0	0	0	NA	0	0	0	NA	NA	2	chr2	175199828	175199829	chr2:175199828-175199829	SP9,	1	0
cg27116912	NA	1	0	1	0	0	NA	1	0	0	NA	0	0	NA	NA	0	0	1	NA	NA	0	0	0	0	0	0	0	NA	0	0	0	NA	NA	4	chr2	176947940	176947941	chr2:176947940-176947941	EVX2,	1	0
cg08911275	NA	0	0	0	1	0	NA	0	0	0	NA	0	0	NA	NA	0	0	0	NA	NA	0	0	0	0	0	0	0	NA	0	0	0	NA	NA	1	chr2	176957462	176957463	chr2:176957462-176957463	HOXD13,	1	0
cg15808943	NA	0	0	0	1	0	NA	0	0	0	NA	0	0	NA	NA	0	0	0	NA	NA	0	0	0	0	0	0	0	NA	0	0	0	NA	NA	1	chr2	176994665	176994666	chr2:176994665-176994666	HOXD8,	1	0
cg21319323	NA	0	0	0	0	0	NA	0	0	0	NA	0	0	NA	NA	0	0	1	NA	NA	0	0	0	0	0	0	0	NA	0	0	0	NA	NA	1	chr2	177001263	177001264	chr2:177001263-177001264	HOXD-AS2,	1	1
cg06952671	NA	0	0	0	0	1	NA	0	0	0	NA	0	0	NA	NA	0	0	0	NA	NA	0	0	0	1	0	0	1	NA	0	0	0	NA	NA	3	chr2	182322268	182322269	chr2:182322268-182322269	ITGA4,	1	0
cg01431993	NA	0	0	1	0	0	NA	0	0	0	NA	0	0	NA	NA	0	0	0	NA	NA	0	0	0	0	0	0	0	NA	0	0	0	NA	NA	1	chr2	182542864	182542865	chr2:182542864-182542865	NEUROD1,	1	1
cg07548607	NA	0	0	0	0	1	NA	0	0	0	NA	0	0	NA	NA	0	0	0	NA	NA	0	0	0	0	0	0	0	NA	0	0	0	NA	NA	1	chr2	187713964	187713965	chr2:187713964-187713965	ZSWIM2,	0	0
cg08350814	NA	0	0	0	0	0	NA	0	0	0	NA	0	0	NA	NA	0	0	0	NA	NA	0	0	1	0	0	0	0	NA	0	0	0	NA	NA	1	chr2	191045309	191045310	chr2:191045309-191045310	C2orf88,	1	0
cg20195812	NA	0	0	0	0	0	NA	0	0	0	NA	0	0	NA	NA	0	0	0	NA	NA	0	0	0	0	0	1	0	NA	0	0	0	NA	NA	1	chr2	192015677	192015678	chr2:192015677-192015678	STAT4,	0	0
cg20391764	NA	0	0	0	0	0	NA	0	1	0	NA	0	0	NA	NA	0	0	0	NA	NA	0	0	0	0	0	0	0	NA	0	0	0	NA	NA	1	chr2	192110565	192110566	chr2:192110565-192110566	MYO1B,	0	0
cg01808545	NA	0	0	0	0	1	NA	0	0	0	NA	0	0	NA	NA	0	0	0	NA	NA	0	0	0	1	0	0	0	NA	0	0	0	NA	NA	2	chr2	193059717	193059718	chr2:193059717-193059718	TMEFF2,	1	0
cg07495363	NA	1	0	1	0	1	NA	1	0	1	NA	0	0	NA	NA	0	0	0	NA	NA	0	0	0	1	0	0	0	NA	0	0	1	NA	NA	7	chr2	198651076	198651077	chr2:198651076-198651077	BOLL,	1	0
cg13875120	NA	0	0	0	0	0	NA	0	0	0	NA	0	0	NA	NA	0	0	0	NA	NA	0	0	1	0	0	0	0	NA	0	0	0	NA	NA	1	chr2	201450743	201450744	chr2:201450743-201450744	AOX1,	1	0
cg07536926	NA	0	0	0	0	1	NA	0	0	0	NA	0	0	NA	NA	0	0	0	NA	NA	0	0	0	0	0	0	0	NA	0	0	0	NA	NA	1	chr2	213401565	213401566	chr2:213401565-213401566	ERBB4,	1	0
cg00260634	NA	0	0	0	0	0	NA	0	0	0	NA	0	0	NA	NA	0	0	0	NA	NA	0	0	1	0	0	0	0	NA	0	0	0	NA	NA	1	chr2	219847233	219847234	chr2:219847233-219847234	FEV,	1	0
cg09424526	NA	0	0	1	1	0	NA	0	0	0	NA	0	0	NA	NA	0	0	0	NA	NA	0	0	0	0	0	0	0	NA	0	0	1	NA	NA	3	chr2	223163809	223163810	chr2:223163809-223163810	CCDC140,	1	0
cg12974388	NA	0	0	0	0	0	NA	0	1	0	NA	0	0	NA	NA	0	0	0	NA	NA	0	0	0	0	0	0	0	NA	0	0	0	NA	NA	1	chr2	237072998	237072999	chr2:237072998-237072999	GBX2,	1	0
cg09140778	NA	0	0	0	0	0	NA	0	1	0	NA	0	0	NA	NA	0	0	0	NA	NA	0	0	0	0	0	0	0	NA	0	0	0	NA	NA	1	chr2	237086398	237086399	chr2:237086398-237086399	,	1	0
cg19324714	NA	0	0	0	0	1	NA	0	0	0	NA	0	0	NA	NA	0	0	0	NA	NA	0	0	0	0	0	0	0	NA	0	0	0	NA	NA	1	chr2	237145437	237145438	chr2:237145437-237145438	ASB18,	1	0
cg02367660	NA	0	0	0	0	1	NA	0	0	0	NA	0	0	NA	NA	0	0	0	NA	NA	0	0	0	0	0	0	0	NA	0	0	0	NA	NA	1	chr2	238535997	238535998	chr2:238535997-238535998	LRRFIP1,	1	0
cg05874732	NA	0	0	1	0	1	NA	0	0	0	NA	0	0	NA	NA	0	0	0	NA	NA	0	0	0	0	0	0	0	NA	0	0	0	NA	NA	2	chr20	2539552	2539553	chr20:2539552-2539553	TMC2,	1	0
cg15547669	NA	0	0	0	0	1	NA	0	0	0	NA	0	0	NA	NA	0	0	0	NA	NA	0	0	0	0	0	0	0	NA	0	0	0	NA	NA	1	chr20	2781122	2781123	chr20:2781122-2781123	CPXM1,	1	0
cg06404175	NA	0	0	0	0	0	NA	0	0	0	NA	0	0	NA	NA	0	0	0	NA	NA	0	0	1	0	0	0	0	NA	0	0	1	NA	NA	2	chr20	3052692	3052693	chr20:3052692-3052693	OXT,	1	0
cg13516746	NA	0	0	0	0	1	NA	0	0	0	NA	0	0	NA	NA	0	0	0	NA	NA	0	0	0	0	0	0	0	NA	0	0	0	NA	NA	1	chr20	3389408	3389409	chr20:3389408-3389409	C20orf194,	0	0
cg21001198	NA	0	0	0	0	0	NA	0	0	0	NA	0	0	NA	NA	0	0	0	NA	NA	0	0	1	0	0	0	0	NA	0	0	0	NA	NA	1	chr20	6033205	6033206	chr20:6033205-6033206	LRRN4,	1	0
cg24124029	NA	0	0	1	0	0	NA	0	0	0	NA	0	0	NA	NA	0	0	0	NA	NA	0	0	0	0	0	0	0	NA	0	0	0	NA	NA	1	chr20	9495572	9495573	chr20:9495572-9495573	LAMP5, LAMP5-AS1,	1	1
cg01397679	NA	0	0	1	0	1	NA	0	0	0	NA	0	0	NA	NA	0	0	0	NA	NA	0	0	0	1	0	0	0	NA	0	0	0	NA	NA	3	chr20	21493101	21493102	chr20:21493101-21493102	NKX2-2,	1	0
cg09252495	NA	0	0	1	0	0	NA	0	0	1	NA	0	0	NA	NA	0	0	0	NA	NA	0	0	0	0	0	0	0	NA	0	0	0	NA	NA	2	chr20	21503898	21503899	chr20:21503898-21503899	,	1	0
cg01783070	NA	0	0	1	0	0	NA	0	0	0	NA	0	0	NA	NA	0	0	0	NA	NA	0	0	0	0	0	0	0	NA	0	0	0	NA	NA	1	chr20	21686293	21686294	chr20:21686293-21686294	LINC01726, PAX1,	1	1
cg06226567	NA	0	0	1	0	0	NA	0	0	0	NA	0	0	NA	NA	0	0	0	NA	NA	0	0	0	0	0	0	0	NA	0	0	0	NA	NA	1	chr20	22559676	22559677	chr20:22559676-22559677	FOXA2, LINC00261,	1	1
cg15343461	NA	0	0	0	0	1	NA	0	0	0	NA	0	0	NA	NA	0	0	0	NA	NA	0	0	0	0	0	0	0	NA	0	0	0	NA	NA	1	chr20	24451084	24451085	chr20:24451084-24451085	SYNDIG1,	1	0
cg14763548	NA	0	0	1	0	1	NA	1	0	1	NA	0	0	NA	NA	0	0	0	NA	NA	0	0	0	0	0	0	0	NA	0	0	1	NA	NA	5	chr20	25062447	25062448	chr20:25062447-25062448	VSX1,	1	1
cg04865491	NA	1	0	0	0	0	NA	0	0	0	NA	0	0	NA	NA	0	0	0	NA	NA	0	0	0	0	0	0	0	NA	0	0	0	NA	NA	1	chr20	25065207	25065208	chr20:25065207-25065208	VSX1,	1	1
cg22645427	NA	0	0	0	0	0	NA	0	0	0	NA	0	0	NA	NA	0	0	0	NA	NA	0	0	1	0	0	0	0	NA	0	0	0	NA	NA	1	chr20	25129520	25129521	chr20:25129520-25129521	LOC284798,	1	1
cg13513864	NA	0	0	1	0	0	NA	0	0	0	NA	0	0	NA	NA	0	0	0	NA	NA	0	0	0	0	0	0	0	NA	0	0	0	NA	NA	1	chr20	30063249	30063250	chr20:30063249-30063250	REM1,	1	0
cg09923107	NA	0	0	0	0	0	NA	0	0	0	NA	0	0	NA	NA	0	0	0	NA	NA	0	0	0	0	0	1	0	NA	0	0	0	NA	NA	1	chr20	30193892	30193893	chr20:30193892-30193893	ID1,	0	0
cg13042543	NA	0	0	0	0	1	NA	0	0	0	NA	0	0	NA	NA	0	0	0	NA	NA	0	0	0	1	0	0	0	NA	0	0	0	NA	NA	2	chr20	30640256	30640257	chr20:30640256-30640257	HCK,	1	0
cg22128431	NA	0	0	0	0	1	NA	0	0	0	NA	0	0	NA	NA	0	0	0	NA	NA	0	0	0	1	0	0	0	NA	0	0	0	NA	NA	2	chr20	37434409	37434410	chr20:37434409-37434410	PPP1R16B,	1	0
cg07906520	NA	0	0	0	0	0	NA	0	0	0	NA	0	0	NA	NA	0	0	0	NA	NA	0	0	1	0	0	0	0	NA	0	0	0	NA	NA	1	chr20	37435716	37435717	chr20:37435716-37435717	PPP1R16B,	1	0
cg24033330	NA	0	0	0	0	1	NA	0	0	0	NA	0	0	NA	NA	0	0	0	NA	NA	0	0	0	1	0	0	0	NA	0	0	0	NA	NA	2	chr20	39317034	39317035	chr20:39317034-39317035	MAFB,	1	0
cg13919438	NA	0	0	0	0	1	NA	0	0	0	NA	0	0	NA	NA	0	0	0	NA	NA	0	0	0	1	0	0	0	NA	0	0	0	NA	NA	2	chr20	39995546	39995547	chr20:39995546-39995547	EMILIN3,	1	0
cg17859110	NA	0	0	1	0	1	NA	0	0	0	NA	0	0	NA	NA	0	0	0	NA	NA	0	0	0	1	0	0	0	NA	0	0	0	NA	NA	3	chr20	41818770	41818771	chr20:41818770-41818771	PTPRT,	1	0
cg26348514	NA	0	0	0	0	0	NA	0	0	0	NA	0	0	NA	NA	0	0	0	NA	NA	0	0	1	0	0	0	0	NA	0	0	0	NA	NA	1	chr20	44098358	44098359	chr20:44098358-44098359	WFDC2,	1	0
cg07139762	NA	0	0	1	0	0	NA	0	0	0	NA	0	0	NA	NA	0	0	0	NA	NA	0	0	0	0	0	0	0	NA	0	0	1	NA	NA	2	chr20	45142244	45142245	chr20:45142244-45142245	ZNF334,	0	1
cg03361585	NA	0	0	0	0	1	NA	0	0	0	NA	0	0	NA	NA	0	1	0	NA	NA	0	0	0	0	0	0	0	NA	0	0	0	NA	NA	2	chr20	47444241	47444242	chr20:47444241-47444242	PREX1,	1	0
cg23383871	NA	0	0	1	0	0	NA	0	0	1	NA	0	0	NA	NA	0	0	0	NA	NA	0	0	0	1	0	0	0	NA	0	0	0	NA	NA	3	chr20	47934987	47934988	chr20:47934987-47934988	,	1	0
cg17846334	NA	0	0	0	0	1	NA	0	0	0	NA	0	0	NA	NA	0	0	0	NA	NA	0	0	0	1	0	0	0	NA	0	0	0	NA	NA	2	chr20	49639134	49639135	chr20:49639134-49639135	KCNG1,	1	0
cg18881873	NA	0	0	0	0	0	NA	0	0	0	NA	0	0	NA	NA	0	0	0	NA	NA	0	0	1	0	0	0	0	NA	0	0	0	NA	NA	1	chr20	52276947	52276948	chr20:52276947-52276948	,	0	0
cg00741836	NA	0	0	0	0	1	NA	0	0	0	NA	0	0	NA	NA	0	0	0	NA	NA	0	0	0	0	0	0	0	NA	0	0	0	NA	NA	1	chr20	53092233	53092234	chr20:53092233-53092234	DOK5,	0	0
cg20107395	NA	0	0	0	0	0	NA	0	0	0	NA	0	0	NA	NA	0	0	0	NA	NA	0	0	0	1	0	0	0	NA	0	0	0	NA	NA	1	chr20	53092334	53092335	chr20:53092334-53092335	DOK5,	0	0
cg03264601	NA	0	0	0	0	1	NA	0	0	0	NA	0	0	NA	NA	0	0	0	NA	NA	0	0	0	1	0	0	0	NA	0	0	0	NA	NA	2	chr20	55500670	55500671	chr20:55500670-55500671	,	1	0
cg08318212	NA	0	0	1	0	0	NA	0	0	0	NA	0	0	NA	NA	0	0	0	NA	NA	0	0	0	0	0	0	0	NA	0	0	0	NA	NA	1	chr20	57875364	57875365	chr20:57875364-57875365	EDN3,	1	0
cg01278387	NA	0	0	0	0	1	NA	0	0	0	NA	0	0	NA	NA	0	0	0	NA	NA	0	0	0	0	0	0	0	NA	0	0	0	NA	NA	1	chr20	58152281	58152282	chr20:58152281-58152282	PHACTR3,	1	0
cg19115393	NA	0	0	0	0	1	NA	0	0	0	NA	0	0	NA	NA	0	0	0	NA	NA	0	0	0	0	0	0	0	NA	0	0	0	NA	NA	1	chr20	59829060	59829061	chr20:59829060-59829061	CDH4,	1	0
cg14980983	NA	0	0	0	0	1	NA	0	0	0	NA	0	0	NA	NA	0	0	0	NA	NA	0	0	0	0	0	0	0	NA	0	0	0	NA	NA	1	chr20	61051039	61051040	chr20:61051039-61051040	GATA5,	1	0
cg18278265	NA	0	0	0	0	0	NA	0	0	0	NA	0	0	NA	NA	0	0	0	NA	NA	0	0	0	1	0	0	0	NA	0	0	0	NA	NA	1	chr20	61051438	61051439	chr20:61051438-61051439	GATA5,	1	0
cg09893588	NA	0	0	0	0	1	NA	0	0	0	NA	0	0	NA	NA	0	0	0	NA	NA	0	0	0	0	0	0	0	NA	0	0	0	NA	NA	1	chr20	61340109	61340110	chr20:61340109-61340110	NTSR1,	1	0
cg21161253	NA	0	0	1	0	0	NA	0	0	0	NA	0	0	NA	NA	0	0	0	NA	NA	0	0	0	0	0	0	0	NA	0	0	0	NA	NA	1	chr20	61638149	61638150	chr20:61638149-61638150	BHLHE23,	1	0
cg02650317	NA	0	0	1	0	1	NA	0	0	0	NA	0	0	NA	NA	0	0	0	NA	NA	0	0	0	0	0	0	0	NA	0	0	0	NA	NA	2	chr20	61808888	61808889	chr20:61808888-61808889	MIR124-3,	1	1
cg15699267	NA	0	0	0	0	0	NA	0	0	1	NA	0	0	NA	NA	0	0	0	NA	NA	0	0	0	1	0	0	0	NA	0	0	0	NA	NA	2	chr20	61809557	61809558	chr20:61809557-61809558	MIR124-3,	1	1
cg18412834	NA	0	0	0	0	1	NA	0	0	0	NA	0	0	NA	NA	0	0	0	NA	NA	0	0	0	0	0	0	0	NA	0	0	0	NA	NA	1	chr20	61885291	61885292	chr20:61885291-61885292	NKAIN4,	1	0
cg08003150	NA	0	0	0	0	1	NA	0	0	0	NA	0	0	NA	NA	0	0	0	NA	NA	0	0	0	0	0	0	0	NA	0	0	0	NA	NA	1	chr20	62103627	62103628	chr20:62103627-62103628	KCNQ2,	1	0
cg23931672	NA	0	0	0	0	1	NA	0	0	0	NA	0	0	NA	NA	0	0	0	NA	NA	0	0	0	0	0	0	0	NA	0	0	0	NA	NA	1	chr20	62601568	62601569	chr20:62601568-62601569	SAMD10, ZNF512B,	0	0
cg12426234	NA	0	0	0	0	1	NA	0	0	0	NA	0	0	NA	NA	0	0	0	NA	NA	0	0	0	0	0	0	0	NA	0	0	0	NA	NA	1	chr21	22370347	22370348	chr21:22370347-22370348	NCAM2,	1	0
cg15681537	NA	0	0	0	0	0	NA	0	0	0	NA	0	0	NA	NA	0	0	0	NA	NA	0	0	0	1	0	0	0	NA	0	0	0	NA	NA	1	chr21	22370733	22370734	chr21:22370733-22370734	NCAM2,	1	0
cg03382304	NA	0	0	0	0	1	NA	0	0	0	NA	0	0	NA	NA	0	0	0	NA	NA	0	0	0	1	0	0	1	NA	0	0	0	NA	NA	3	chr21	27012176	27012177	chr21:27012176-27012177	JAM2,	0	1
cg21646598	NA	0	0	0	0	1	NA	0	0	0	NA	0	0	NA	NA	0	0	0	NA	NA	0	0	0	0	0	0	0	NA	0	0	0	NA	NA	1	chr21	28339907	28339908	chr21:28339907-28339908	ADAMTS5,	1	0
cg15299832	NA	0	0	0	0	1	NA	0	0	0	NA	0	0	NA	NA	0	0	0	NA	NA	0	0	0	0	0	0	0	NA	0	0	0	NA	NA	1	chr21	34398131	34398132	chr21:34398131-34398132	OLIG2,	1	0
cg08870743	NA	0	0	1	0	0	NA	0	0	1	NA	0	0	NA	NA	0	0	0	NA	NA	0	0	0	0	0	0	0	NA	0	0	0	NA	NA	2	chr21	34398199	34398200	chr21:34398199-34398200	OLIG2,	1	0
cg23253569	NA	0	0	0	0	0	NA	0	0	0	NA	0	0	NA	NA	0	0	0	NA	NA	0	0	0	0	0	0	0	NA	0	0	1	NA	NA	1	chr21	34398222	34398223	chr21:34398222-34398223	OLIG2,	1	0
cg17935217	NA	0	0	0	0	0	NA	0	0	0	NA	0	0	NA	NA	0	0	0	NA	NA	0	0	0	0	0	0	0	NA	0	0	1	NA	NA	1	chr21	36042170	36042171	chr21:36042170-36042171	CLIC6,	1	0
cg00397324	NA	0	0	0	0	0	NA	0	0	0	NA	0	0	NA	NA	0	0	0	NA	NA	0	0	1	0	0	0	0	NA	0	0	0	NA	NA	1	chr21	42798594	42798595	chr21:42798594-42798595	MX1,	1	0
cg10457056	NA	0	0	0	0	1	NA	0	0	0	NA	0	0	NA	NA	0	0	0	NA	NA	0	0	0	0	0	0	0	NA	0	0	0	NA	NA	1	chr21	44494997	44494998	chr21:44494997-44494998	CBS, CBSL,	0	0
cg15777964	NA	0	0	0	0	1	NA	0	0	0	NA	0	0	NA	NA	0	0	0	NA	NA	0	0	0	0	0	0	0	NA	0	0	0	NA	NA	1	chr21	44847606	44847607	chr21:44847606-44847607	LOC102724428, SIK1,	1	0
cg00612595	NA	0	0	0	0	0	NA	0	0	0	NA	0	0	NA	NA	0	0	0	NA	NA	0	0	1	0	0	0	0	NA	0	0	0	NA	NA	1	chr21	47717864	47717865	chr21:47717864-47717865	C21orf58, YBEY,	1	0
cg17577122	NA	0	0	0	0	1	NA	0	0	0	NA	0	0	NA	NA	0	0	0	NA	NA	0	0	0	0	0	0	0	NA	0	0	0	NA	NA	1	chr22	19511967	19511968	chr22:19511967-19511968	CLDN5,	1	0
cg09938462	NA	1	0	0	0	0	NA	0	0	0	NA	0	0	NA	NA	0	0	0	NA	NA	0	0	0	0	0	0	0	NA	0	0	0	NA	NA	1	chr22	19706365	19706366	chr22:19706365-19706366	SEPT5, SEPT5-GP1BB,	1	1
cg02440976	NA	0	0	1	0	0	NA	0	0	0	NA	0	0	NA	NA	0	0	0	NA	NA	0	0	0	0	0	0	0	NA	0	0	0	NA	NA	1	chr22	22863054	22863055	chr22:22863054-22863055	ZNF280B,	1	1
cg22517656	NA	0	0	1	0	0	NA	0	0	0	NA	0	0	NA	NA	0	0	0	NA	NA	0	0	0	0	0	0	0	NA	0	0	0	NA	NA	1	chr22	25678615	25678616	chr22:25678615-25678616	,	1	0
cg27422872	NA	0	0	0	0	0	NA	0	0	0	NA	0	0	NA	NA	0	0	0	NA	NA	0	0	1	0	0	0	0	NA	0	0	0	NA	NA	1	chr22	28839137	28839138	chr22:28839137-28839138	TTC28,	0	0
cg20464804	NA	0	0	0	0	1	NA	0	0	0	NA	0	0	NA	NA	0	0	0	NA	NA	0	0	0	0	0	0	0	NA	0	0	0	NA	NA	1	chr22	33454491	33454492	chr22:33454491-33454492	SYN3,	1	0
cg18399321	NA	0	0	0	0	1	NA	0	0	0	NA	0	0	NA	NA	0	0	0	NA	NA	0	0	0	0	0	0	0	NA	0	0	0	NA	NA	1	chr22	39853590	39853591	chr22:39853590-39853591	MGAT3,	1	0
cg26684946	NA	0	0	0	0	1	NA	0	0	0	NA	0	0	NA	NA	0	0	0	NA	NA	0	0	0	0	0	0	0	NA	0	0	0	NA	NA	1	chr22	43739575	43739576	chr22:43739575-43739576	SCUBE1,	1	0
cg15679813	NA	0	0	0	0	1	NA	0	0	0	NA	0	0	NA	NA	0	0	0	NA	NA	0	0	0	0	0	0	0	NA	0	0	0	NA	NA	1	chr22	45405627	45405628	chr22:45405627-45405628	PHF21B,	0	0
cg16818414	NA	0	0	0	0	1	NA	0	0	0	NA	0	0	NA	NA	0	0	0	NA	NA	0	0	0	0	0	0	0	NA	0	0	0	NA	NA	1	chr22	45898966	45898967	chr22:45898966-45898967	FBLN1,	0	0
cg04198308	NA	0	0	1	0	1	NA	0	0	0	NA	0	0	NA	NA	0	0	0	NA	NA	0	0	0	1	0	0	0	NA	0	0	0	NA	NA	3	chr22	48971959	48971960	chr22:48971959-48971960	FAM19A5,	0	0
cg24094706	NA	0	0	0	0	0	NA	0	0	1	NA	0	0	NA	NA	0	0	0	NA	NA	0	0	0	0	0	0	0	NA	0	0	0	NA	NA	1	chr22	48972536	48972537	chr22:48972536-48972537	FAM19A5,	0	0
cg24307799	NA	0	0	0	0	1	NA	0	0	0	NA	0	0	NA	NA	0	0	0	NA	NA	0	0	0	0	0	0	0	NA	0	0	0	NA	NA	1	chr3	238931	238932	chr3:238931-238932	CHL1, CHL1-AS2,	1	1
cg13142700	NA	0	0	0	0	1	NA	0	0	0	NA	0	0	NA	NA	0	0	0	NA	NA	0	0	0	0	0	0	0	NA	0	0	0	NA	NA	1	chr3	11034501	11034502	chr3:11034501-11034502	SLC6A1,	1	0
cg22839075	NA	0	0	1	0	0	NA	0	0	0	NA	0	0	NA	NA	0	0	0	NA	NA	0	0	0	0	0	0	0	NA	0	0	0	NA	NA	1	chr3	12045461	12045462	chr3:12045461-12045462	SYN2,	1	0
cg20168412	NA	0	0	0	0	1	NA	0	0	0	NA	0	0	NA	NA	0	0	0	NA	NA	0	0	0	0	0	0	0	NA	0	0	0	NA	NA	1	chr3	13324132	13324133	chr3:13324132-13324133	,	1	0
cg08263589	NA	0	0	1	0	0	NA	0	0	0	NA	0	0	NA	NA	0	0	0	NA	NA	0	0	0	0	0	0	0	NA	0	0	0	NA	NA	1	chr3	14852659	14852660	chr3:14852659-14852660	LINC02011,	1	1
cg04066019	NA	0	0	0	0	0	NA	0	0	0	NA	0	0	NA	NA	0	0	0	NA	NA	0	0	0	0	0	1	0	NA	0	0	0	NA	NA	1	chr3	16554466	16554467	chr3:16554466-16554467	RFTN1,	1	0
cg22623967	NA	0	0	0	0	0	NA	0	0	0	NA	0	0	NA	NA	0	0	0	NA	NA	0	0	0	0	0	0	1	NA	0	0	0	NA	NA	1	chr3	16554910	16554911	chr3:16554910-16554911	RFTN1,	1	0
cg23718026	NA	0	0	0	0	1	NA	0	0	0	NA	0	0	NA	NA	0	0	0	NA	NA	0	0	0	0	0	0	0	NA	0	0	0	NA	NA	1	chr3	16555379	16555380	chr3:16555379-16555380	RFTN1,	1	0
cg26124016	NA	0	0	0	0	0	NA	0	0	0	NA	0	0	NA	NA	0	0	0	NA	NA	0	0	1	0	0	0	0	NA	0	0	0	NA	NA	1	chr3	25469402	25469403	chr3:25469402-25469403	RARB,	1	0
cg06088918	NA	0	0	0	0	0	NA	0	0	0	NA	0	0	NA	NA	0	0	0	NA	NA	0	0	0	0	0	1	0	NA	0	0	0	NA	NA	1	chr3	27755600	27755601	chr3:27755600-27755601	EOMES,	1	0
cg08700032	NA	0	0	0	0	1	NA	0	0	0	NA	0	0	NA	NA	0	0	0	NA	NA	0	0	0	1	0	0	0	NA	0	0	0	NA	NA	2	chr3	28616682	28616683	chr3:28616682-28616683	LINC00693,	1	1
cg19127283	NA	0	0	0	0	1	NA	0	0	0	NA	0	0	NA	NA	0	0	0	NA	NA	0	0	0	0	0	0	0	NA	0	0	0	NA	NA	1	chr3	32859407	32859408	chr3:32859407-32859408	TRIM71,	0	0
cg27549834	NA	0	0	0	0	0	NA	0	0	0	NA	0	0	NA	NA	0	0	0	NA	NA	0	0	0	0	0	1	0	NA	0	0	0	NA	NA	1	chr3	39850412	39850413	chr3:39850412-39850413	MYRIP,	1	0
cg19509715	NA	0	0	0	0	1	NA	0	0	0	NA	0	0	NA	NA	0	0	0	NA	NA	0	0	0	0	0	0	0	NA	0	0	0	NA	NA	1	chr3	44037128	44037129	chr3:44037128-44037129	,	1	0
cg01139508	NA	0	0	1	0	1	NA	0	0	0	NA	0	0	NA	NA	0	0	0	NA	NA	0	0	0	0	0	0	0	NA	0	0	0	NA	NA	2	chr3	44626538	44626539	chr3:44626538-44626539	ZNF660,	0	0
cg13348059	NA	0	0	0	0	0	NA	0	0	0	NA	0	0	NA	NA	0	0	0	NA	NA	0	0	0	0	0	0	0	NA	0	0	1	NA	NA	1	chr3	44727069	44727070	chr3:44727069-44727070	,	0	0
cg00158683	NA	0	0	0	0	0	NA	0	0	0	NA	0	0	NA	NA	0	0	0	NA	NA	0	0	1	0	0	0	0	NA	0	0	0	NA	NA	1	chr3	48632625	48632626	chr3:48632625-48632626	COL7A1, UQCRC1,	1	0
cg26386852	NA	0	0	0	0	1	NA	0	0	0	NA	0	0	NA	NA	0	0	0	NA	NA	0	0	0	0	0	0	0	NA	0	0	0	NA	NA	1	chr3	48693882	48693883	chr3:48693882-48693883	CELSR3,	0	0
cg23069167	NA	0	0	0	0	1	NA	0	0	0	NA	0	0	NA	NA	0	0	0	NA	NA	0	0	1	1	0	0	0	NA	0	0	0	NA	NA	3	chr3	61550379	61550380	chr3:61550379-61550380	PTPRG,	0	0
cg19227130	NA	0	0	1	0	0	NA	0	0	0	NA	0	0	NA	NA	0	0	0	NA	NA	0	0	0	0	0	0	0	NA	0	0	1	NA	NA	2	chr3	62359392	62359393	chr3:62359392-62359393	FEZF2,	1	0
cg13491481	NA	0	0	1	0	0	NA	0	0	0	NA	0	0	NA	NA	0	0	0	NA	NA	0	0	0	0	0	0	0	NA	0	0	1	NA	NA	2	chr3	62861142	62861143	chr3:62861142-62861143	CADPS,	0	0
cg03186486	NA	0	0	0	0	0	NA	0	0	0	NA	0	0	NA	NA	0	0	0	NA	NA	0	0	1	0	0	0	0	NA	0	0	0	NA	NA	1	chr3	68980947	68980948	chr3:68980947-68980948	FAM19A4,	1	0
cg09868336	NA	0	0	1	0	1	NA	0	0	0	NA	0	0	NA	NA	0	0	0	NA	NA	0	0	0	0	0	0	0	NA	0	0	0	NA	NA	2	chr3	68981866	68981867	chr3:68981866-68981867	FAM19A4,	1	0
cg22823146	NA	0	0	0	0	0	NA	0	0	0	NA	0	0	NA	NA	0	0	0	NA	NA	0	0	0	1	0	0	0	NA	0	0	0	NA	NA	1	chr3	71802594	71802595	chr3:71802594-71802595	EIF4E3,	1	0
cg10172415	NA	0	0	0	0	1	NA	0	0	0	NA	0	0	NA	NA	0	0	0	NA	NA	0	0	0	0	0	0	0	NA	0	0	0	NA	NA	1	chr3	71803558	71803559	chr3:71803558-71803559	EIF4E3, GPR27,	1	0
cg10804678	NA	0	0	0	0	0	NA	0	0	0	NA	0	0	NA	NA	0	0	0	NA	NA	0	0	1	0	0	0	0	NA	0	0	0	NA	NA	1	chr3	72788309	72788310	chr3:72788309-72788310	,	1	0
cg23039333	NA	0	0	1	0	0	NA	0	0	0	NA	0	0	NA	NA	0	0	0	NA	NA	0	0	0	0	0	0	0	NA	0	0	0	NA	NA	1	chr3	87842246	87842247	chr3:87842246-87842247	HTR1F,	1	0
cg17216759	NA	0	0	0	0	0	NA	0	1	0	NA	0	0	NA	NA	0	0	0	NA	NA	0	0	0	0	0	0	0	NA	0	0	0	NA	NA	1	chr3	107810361	107810362	chr3:107810361-107810362	CD47,	1	0
cg03556653	NA	0	0	1	0	0	NA	0	0	0	NA	0	0	NA	NA	0	0	0	NA	NA	0	0	0	0	0	0	0	NA	0	0	0	NA	NA	1	chr3	115231501	115231502	chr3:115231501-115231502	,	0	0
cg10029213	NA	0	0	1	0	1	NA	0	0	0	NA	0	0	NA	NA	0	0	0	NA	NA	0	0	0	0	0	0	0	NA	0	0	0	NA	NA	2	chr3	117716312	117716313	chr3:117716312-117716313	,	1	0
cg07330230	NA	0	0	0	0	0	NA	0	0	0	NA	0	0	NA	NA	0	0	0	NA	NA	0	0	1	0	0	0	0	NA	0	0	0	NA	NA	1	chr3	125899925	125899926	chr3:125899925-125899926	ALDH1L1, ALDH1L1-AS2,	1	1
cg07398614	NA	0	0	0	0	0	NA	0	0	0	NA	0	0	NA	NA	0	0	0	NA	NA	0	0	1	0	0	0	0	NA	0	0	0	NA	NA	1	chr3	128564918	128564919	chr3:128564918-128564919	,	0	0
cg02604524	NA	0	0	0	0	1	NA	0	0	0	NA	0	0	NA	NA	0	0	0	NA	NA	0	0	0	1	0	0	0	NA	0	0	0	NA	NA	2	chr3	128720884	128720885	chr3:128720884-128720885	EFCC1, KIAA1257,	1	0
cg08195943	NA	0	1	1	0	1	NA	0	0	0	NA	0	0	NA	NA	0	0	0	NA	NA	0	0	0	1	0	1	0	NA	0	0	1	NA	NA	6	chr3	129694487	129694488	chr3:129694487-129694488	TRH,	1	0
cg00329270	NA	0	0	0	0	1	NA	0	0	0	NA	0	0	NA	NA	0	0	0	NA	NA	0	0	0	0	0	0	0	NA	0	0	0	NA	NA	1	chr3	134369919	134369920	chr3:134369919-134369920	KY,	1	0
cg22889573	NA	0	0	0	0	0	NA	0	0	0	NA	0	0	NA	NA	0	0	0	NA	NA	0	0	0	1	0	0	0	NA	0	0	0	NA	NA	1	chr3	134369939	134369940	chr3:134369939-134369940	KY,	1	0
cg17823751	NA	0	0	1	0	0	NA	0	0	0	NA	0	0	NA	NA	0	0	0	NA	NA	0	0	0	0	0	0	0	NA	0	0	0	NA	NA	1	chr3	137487081	137487082	chr3:137487081-137487082	LINC01210, SOX14,	1	1
cg00134776	NA	0	0	1	0	0	NA	0	0	0	NA	0	0	NA	NA	0	0	0	NA	NA	0	0	0	0	0	0	0	NA	0	0	0	NA	NA	1	chr3	139653573	139653574	chr3:139653573-139653574	CLSTN2,	1	0
cg02315940	NA	0	0	0	0	1	NA	0	0	0	NA	0	0	NA	NA	0	0	0	NA	NA	0	0	0	0	0	0	0	NA	0	0	0	NA	NA	1	chr3	139653872	139653873	chr3:139653872-139653873	CLSTN2,	1	0
cg20979852	NA	0	0	0	0	1	NA	0	0	0	NA	0	0	NA	NA	0	0	0	NA	NA	0	0	0	0	0	0	0	NA	0	0	0	NA	NA	1	chr3	140770683	140770684	chr3:140770683-140770684	SPSB4,	1	0
cg08774368	NA	0	0	0	0	1	NA	0	0	0	NA	0	0	NA	NA	0	0	0	NA	NA	0	0	0	1	0	0	0	NA	0	0	0	NA	NA	2	chr3	142839578	142839579	chr3:142839578-142839579	CHST2,	1	0
cg17373442	NA	0	0	0	0	0	NA	0	0	0	NA	0	0	NA	NA	0	0	0	NA	NA	0	0	0	0	0	0	1	NA	0	0	0	NA	NA	1	chr3	142839991	142839992	chr3:142839991-142839992	CHST2,	1	0
cg25165701	NA	0	0	0	0	0	NA	0	0	0	NA	0	0	NA	NA	0	0	0	NA	NA	0	0	1	0	0	0	0	NA	0	0	0	NA	NA	1	chr3	151985697	151985698	chr3:151985697-151985698	MBNL1-AS1,	1	1
cg16619395	NA	0	0	1	0	0	NA	0	0	0	NA	0	0	NA	NA	0	0	0	NA	NA	0	0	0	0	0	0	0	NA	0	0	0	NA	NA	1	chr3	154145868	154145869	chr3:154145868-154145869	GPR149,	1	0
cg13619915	NA	0	0	1	0	0	NA	0	0	0	NA	0	0	NA	NA	0	0	0	NA	NA	0	0	0	0	0	0	0	NA	0	0	1	NA	NA	2	chr3	164914437	164914438	chr3:164914437-164914438	SLITRK3,	1	0
cg15494117	NA	0	0	0	0	0	NA	0	0	0	NA	0	0	NA	NA	0	0	0	NA	NA	0	0	0	0	0	0	0	NA	0	0	1	NA	NA	1	chr3	169482895	169482896	chr3:169482895-169482896	ACTRT3, TERC,	0	1
cg15987088	NA	0	0	1	0	0	NA	0	0	0	NA	0	0	NA	NA	0	0	0	NA	NA	0	0	0	0	0	0	0	NA	0	0	1	NA	NA	2	chr3	172166234	172166235	chr3:172166234-172166235	GHSR,	1	0
cg03175305	NA	0	0	1	0	0	NA	0	0	0	NA	0	0	NA	NA	0	0	0	NA	NA	0	0	0	0	0	0	0	NA	0	0	0	NA	NA	1	chr3	179754483	179754484	chr3:179754483-179754484	PEX5L,	0	0
cg15057061	NA	0	1	0	1	0	NA	0	0	0	NA	0	0	NA	NA	0	0	0	NA	NA	0	0	0	0	0	0	0	NA	0	0	0	NA	NA	2	chr3	181437299	181437300	chr3:181437299-181437300	SOX2-OT,	0	1
cg17202313	NA	0	0	0	1	0	NA	0	0	0	NA	0	0	NA	NA	0	0	0	NA	NA	0	0	1	0	0	0	0	NA	0	0	0	NA	NA	2	chr3	181444989	181444990	chr3:181444989-181444990	SOX2-OT,	1	1
cg08675193	NA	0	0	1	0	0	NA	0	0	0	NA	0	0	NA	NA	0	0	0	NA	NA	0	0	0	0	0	0	0	NA	0	0	0	NA	NA	1	chr3	186080245	186080246	chr3:186080245-186080246	DGKG,	1	0
cg12435415	NA	0	0	0	0	0	NA	0	0	0	NA	0	0	NA	NA	0	0	0	NA	NA	0	0	1	0	0	0	0	NA	0	0	0	NA	NA	1	chr3	186490344	186490345	chr3:186490344-186490345	,	0	0
cg16366473	NA	0	0	0	0	1	NA	0	0	0	NA	0	0	NA	NA	0	0	0	NA	NA	0	0	0	0	0	0	0	NA	0	0	0	NA	NA	1	chr3	192126849	192126850	chr3:192126849-192126850	FGF12,	1	0
cg23207710	NA	0	0	0	0	0	NA	0	0	0	NA	0	0	NA	NA	0	0	0	NA	NA	0	0	0	1	0	0	0	NA	0	0	0	NA	NA	1	chr3	192126960	192126961	chr3:192126960-192126961	FGF12,	1	0
cg22834653	NA	0	0	1	0	1	NA	0	0	0	NA	0	0	NA	NA	0	0	0	NA	NA	0	0	0	1	0	0	0	NA	0	0	0	NA	NA	3	chr3	192232077	192232078	chr3:192232077-192232078	FGF12,	0	0
cg02403395	NA	0	0	1	0	0	NA	0	0	0	NA	0	0	NA	NA	0	0	0	NA	NA	0	0	0	0	0	0	0	NA	0	0	0	NA	NA	1	chr3	192445500	192445501	chr3:192445500-192445501	FGF12,	0	0
cg08825929	NA	0	0	0	0	0	NA	0	0	0	NA	0	0	NA	NA	0	0	0	NA	NA	0	0	1	0	0	0	0	NA	0	0	0	NA	NA	1	chr3	193776240	193776241	chr3:193776240-193776241	LINC02028,	1	1
cg14470398	NA	0	0	0	0	1	NA	0	0	0	NA	0	0	NA	NA	0	0	0	NA	NA	0	0	0	1	0	0	0	NA	0	0	0	NA	NA	2	chr4	657536	657537	chr4:657536-657537	PDE6B,	0	0
cg27655158	NA	1	0	1	0	1	NA	0	0	1	NA	0	0	NA	NA	0	0	0	NA	NA	0	0	0	0	0	0	0	NA	0	0	1	NA	NA	5	chr4	1396593	1396594	chr4:1396593-1396594	NKX1-1,	1	0
cg13432708	NA	0	0	0	0	1	NA	0	0	0	NA	0	0	NA	NA	0	0	0	NA	NA	0	0	0	0	0	0	0	NA	0	0	0	NA	NA	1	chr4	4388505	4388506	chr4:4388505-4388506	NSG1,	1	0
cg01333350	NA	0	0	0	0	1	NA	0	0	0	NA	0	0	NA	NA	0	0	0	NA	NA	0	0	0	0	0	0	0	NA	0	0	0	NA	NA	1	chr4	5712884	5712885	chr4:5712884-5712885	EVC, EVC2,	1	0
cg18013519	NA	0	0	0	0	1	NA	0	0	0	NA	0	0	NA	NA	0	0	0	NA	NA	0	0	0	0	0	0	0	NA	0	0	0	NA	NA	1	chr4	6473964	6473965	chr4:6473964-6473965	PPP2R2C,	1	0
cg11523290	NA	0	0	1	0	0	NA	0	0	0	NA	0	0	NA	NA	0	0	0	NA	NA	0	0	0	0	0	0	0	NA	0	0	0	NA	NA	1	chr4	10463256	10463257	chr4:10463256-10463257	ZNF518B,	1	0
cg13164157	NA	0	0	0	0	0	NA	0	0	0	NA	0	0	NA	NA	0	0	0	NA	NA	0	0	1	0	0	0	0	NA	0	0	0	NA	NA	1	chr4	16085180	16085181	chr4:16085180-16085181	PROM1,	1	0
cg02108033	NA	0	0	0	0	1	NA	0	0	0	NA	0	0	NA	NA	0	0	0	NA	NA	0	0	0	0	0	0	0	NA	0	0	0	NA	NA	1	chr4	17783294	17783295	chr4:17783294-17783295	FAM184B,	1	0
cg27207796	NA	0	0	0	0	0	NA	0	0	0	NA	0	0	NA	NA	0	0	0	NA	NA	0	0	0	1	0	0	0	NA	0	0	0	NA	NA	1	chr4	17783322	17783323	chr4:17783322-17783323	FAM184B,	1	0
cg07204550	NA	1	0	0	0	0	NA	0	0	0	NA	0	0	NA	NA	0	0	0	NA	NA	0	0	0	0	0	0	0	NA	0	0	0	NA	NA	1	chr4	21950155	21950156	chr4:21950155-21950156	KCNIP4,	1	0
cg24663256	NA	0	0	1	0	1	NA	0	0	0	NA	0	0	NA	NA	0	0	0	NA	NA	0	0	0	1	0	0	0	NA	0	0	0	NA	NA	3	chr4	21950307	21950308	chr4:21950307-21950308	KCNIP4,	1	0
cg19766441	NA	0	0	0	0	0	NA	0	0	0	NA	0	0	NA	NA	0	0	0	NA	NA	0	0	1	0	0	0	0	NA	0	0	0	NA	NA	1	chr4	25657365	25657366	chr4:25657365-25657366	SLC34A2,	1	0
cg07578695	NA	0	0	0	0	0	NA	0	1	0	NA	0	0	NA	NA	0	0	0	NA	NA	0	0	0	0	0	0	0	NA	0	0	0	NA	NA	1	chr4	25657414	25657415	chr4:25657414-25657415	SLC34A2,	1	0
cg11416384	NA	0	0	1	0	0	NA	0	0	1	NA	0	0	NA	NA	0	0	0	NA	NA	0	0	0	0	0	0	0	NA	0	0	0	NA	NA	2	chr4	37246827	37246828	chr4:37246827-37246828	NWD2,	1	0
cg07068756	NA	0	0	0	0	0	NA	0	0	0	NA	0	0	NA	NA	0	0	0	NA	NA	0	0	1	0	0	0	0	NA	0	0	0	NA	NA	1	chr4	41258910	41258911	chr4:41258910-41258911	UCHL1,	0	0
cg25950325	NA	0	0	0	0	0	NA	0	0	0	NA	0	0	NA	NA	0	0	0	NA	NA	0	0	0	0	0	0	0	NA	0	0	1	NA	NA	1	chr4	41753712	41753713	chr4:41753712-41753713	PHOX2B,	1	0
cg00516513	NA	0	0	1	0	0	NA	0	0	0	NA	0	0	NA	NA	0	0	0	NA	NA	0	0	0	0	0	0	0	NA	0	0	0	NA	NA	1	chr4	41753803	41753804	chr4:41753803-41753804	PHOX2B,	1	0
cg05674475	NA	0	0	0	0	1	NA	0	0	0	NA	0	0	NA	NA	0	0	0	NA	NA	0	0	0	0	0	0	0	NA	0	0	0	NA	NA	1	chr4	42154385	42154386	chr4:42154385-42154386	BEND4,	1	0
cg10059660	NA	0	0	0	0	0	NA	0	0	0	NA	0	0	NA	NA	0	0	0	NA	NA	0	0	0	0	0	0	0	NA	0	0	1	NA	NA	1	chr4	44450234	44450235	chr4:44450234-44450235	KCTD8,	1	0
cg25145765	NA	0	0	1	0	0	NA	0	0	0	NA	0	0	NA	NA	0	0	0	NA	NA	0	0	0	0	0	0	0	NA	0	0	0	NA	NA	1	chr4	46391392	46391393	chr4:46391392-46391393	GABRA2,	1	0
cg16976370	NA	0	0	1	0	0	NA	0	0	0	NA	0	0	NA	NA	0	0	0	NA	NA	0	0	0	0	0	0	0	NA	0	0	1	NA	NA	2	chr4	46995821	46995822	chr4:46995821-46995822	GABRA4,	1	0
cg06783814	NA	0	0	1	0	0	NA	0	0	0	NA	0	0	NA	NA	0	0	0	NA	NA	0	0	0	0	0	0	0	NA	0	0	0	NA	NA	1	chr4	47034753	47034754	chr4:47034753-47034754	GABRB1,	1	0
cg06798642	NA	0	0	0	0	0	NA	0	1	0	NA	0	0	NA	NA	0	0	0	NA	NA	0	0	0	0	0	0	0	NA	0	0	0	NA	NA	1	chr4	48272082	48272083	chr4:48272082-48272083	TEC,	0	0
cg00691999	NA	0	0	0	0	0	NA	0	0	0	NA	0	0	NA	NA	0	0	0	NA	NA	0	0	1	0	0	0	0	NA	0	0	0	NA	NA	1	chr4	55094011	55094012	chr4:55094011-55094012	PDGFRA,	1	0
cg23209990	NA	0	0	0	0	1	NA	0	0	0	NA	0	0	NA	NA	0	0	0	NA	NA	0	0	0	1	0	0	0	NA	0	0	0	NA	NA	2	chr4	55097576	55097577	chr4:55097576-55097577	PDGFRA,	1	0
cg04528060	NA	0	0	0	0	0	NA	0	0	0	NA	0	0	NA	NA	0	0	0	NA	NA	0	0	1	0	0	0	0	NA	0	0	0	NA	NA	1	chr4	57371868	57371869	chr4:57371868-57371869	ARL9,	1	0
cg19045644	NA	0	0	0	0	0	NA	0	0	0	NA	0	0	NA	NA	0	0	0	NA	NA	0	0	1	0	0	0	0	NA	0	0	0	NA	NA	1	chr4	57976756	57976757	chr4:57976756-57976757	IGFBP7-AS1,	1	1
cg10728756	NA	0	0	0	0	0	NA	0	0	0	NA	0	0	NA	NA	0	0	0	NA	NA	0	0	0	0	0	1	0	NA	0	0	0	NA	NA	1	chr4	74702448	74702449	chr4:74702448-74702449	CXCL6,	0	0
cg14988503	NA	0	0	0	0	0	NA	0	0	0	NA	0	0	NA	NA	1	0	0	NA	NA	0	0	0	0	0	0	0	NA	0	0	0	NA	NA	1	chr4	76555547	76555548	chr4:76555547-76555548	CDKL2,	0	0
cg04343891	NA	0	0	1	0	0	NA	0	0	0	NA	0	0	NA	NA	0	0	0	NA	NA	0	0	0	0	0	0	0	NA	0	0	0	NA	NA	1	chr4	81106663	81106664	chr4:81106663-81106664	PRDM8,	1	0
cg14326413	NA	0	0	0	0	0	NA	0	0	0	NA	0	0	NA	NA	0	0	0	NA	NA	0	1	0	0	0	0	0	NA	0	0	0	NA	NA	1	chr4	81123380	81123381	chr4:81123380-81123381	PRDM8,	1	0
cg22054918	NA	0	0	0	0	0	NA	0	1	0	NA	0	0	NA	NA	0	0	0	NA	NA	0	0	0	0	0	0	0	NA	0	0	0	NA	NA	1	chr4	81123613	81123614	chr4:81123613-81123614	PRDM8,	1	0
cg05894124	NA	0	0	0	0	0	NA	0	0	0	NA	0	0	NA	NA	0	0	0	NA	NA	0	0	0	1	0	0	0	NA	0	0	0	NA	NA	1	chr4	81186795	81186796	chr4:81186795-81186796	FGF5,	1	0
cg02002231	NA	0	0	0	0	1	NA	0	0	0	NA	0	0	NA	NA	0	0	0	NA	NA	0	0	0	0	0	0	0	NA	0	0	0	NA	NA	1	chr4	81187798	81187799	chr4:81187798-81187799	FGF5,	1	0
cg00660105	NA	0	0	0	0	1	NA	0	0	0	NA	0	0	NA	NA	0	0	0	NA	NA	0	0	0	0	0	0	0	NA	0	0	0	NA	NA	1	chr4	82135784	82135785	chr4:82135784-82135785	PRKG2,	1	0
cg26896155	NA	0	0	0	0	0	NA	0	1	0	NA	0	0	NA	NA	0	0	0	NA	NA	0	0	0	0	0	0	0	NA	0	0	0	NA	NA	1	chr4	91048567	91048568	chr4:91048567-91048568	CCSER1,	1	0
cg02468050	NA	0	0	0	0	1	NA	0	0	0	NA	0	0	NA	NA	0	0	0	NA	NA	0	0	0	1	0	0	0	NA	0	0	0	NA	NA	2	chr4	93226380	93226381	chr4:93226380-93226381	GRID2,	0	0
cg09100013	NA	0	0	1	0	0	NA	0	0	0	NA	0	0	NA	NA	0	0	0	NA	NA	0	0	0	0	0	0	0	NA	0	0	0	NA	NA	1	chr4	96469634	96469635	chr4:96469634-96469635	UNC5C,	1	0
cg21782409	NA	0	0	0	0	1	NA	0	0	0	NA	0	0	NA	NA	0	0	0	NA	NA	0	0	0	1	0	0	0	NA	0	0	0	NA	NA	2	chr4	96470887	96470888	chr4:96470887-96470888	UNC5C,	1	0
cg08663159	NA	0	0	1	0	0	NA	0	0	0	NA	0	0	NA	NA	0	0	0	NA	NA	0	0	1	0	0	0	0	NA	0	0	0	NA	NA	2	chr4	101111872	101111873	chr4:101111872-101111873	LOC101929353,	1	1
cg01962428	NA	0	0	1	0	1	NA	0	0	0	NA	0	0	NA	NA	0	0	0	NA	NA	0	0	0	1	0	0	0	NA	0	0	0	NA	NA	3	chr4	107957362	107957363	chr4:107957362-107957363	DKK2,	1	0
cg25088758	NA	0	0	1	0	0	NA	0	0	0	NA	0	0	NA	NA	0	0	0	NA	NA	0	0	0	0	0	0	0	NA	0	0	0	NA	NA	1	chr4	110223598	110223599	chr4:110223598-110223599	COL25A1,	1	0
cg11979589	NA	0	0	0	0	1	NA	0	0	0	NA	0	0	NA	NA	0	0	0	NA	NA	0	0	0	1	0	0	0	NA	0	0	0	NA	NA	2	chr4	110223967	110223968	chr4:110223967-110223968	COL25A1, ZCCHC23,	1	1
cg12353207	NA	0	0	1	0	0	NA	0	0	0	NA	0	0	NA	NA	0	0	0	NA	NA	0	0	0	0	0	0	0	NA	0	0	0	NA	NA	1	chr4	113444295	113444296	chr4:113444295-113444296	,	1	0
cg21599230	NA	0	0	1	0	0	NA	0	0	0	NA	0	0	NA	NA	0	0	0	NA	NA	0	0	0	0	0	0	0	NA	0	0	0	NA	NA	1	chr4	118006619	118006620	chr4:118006619-118006620	TRAM1L1,	0	0
cg19971716	NA	0	0	0	0	0	NA	0	0	0	NA	0	0	NA	NA	0	1	0	NA	NA	0	0	0	0	0	0	0	NA	0	0	0	NA	NA	1	chr4	122301740	122301741	chr4:122301740-122301741	QRFPR,	1	0
cg04638468	NA	0	0	1	0	0	NA	0	0	1	NA	0	0	NA	NA	0	0	0	NA	NA	0	0	0	0	0	0	0	NA	0	0	0	NA	NA	2	chr4	122686453	122686454	chr4:122686453-122686454	PP12613, TMEM155,	1	1
cg04171539	NA	0	0	0	0	1	NA	0	0	0	NA	0	0	NA	NA	0	0	0	NA	NA	0	0	0	1	0	0	0	NA	0	0	0	NA	NA	2	chr4	134068777	134068778	chr4:134068777-134068778	LOC101927359,	1	1
cg02562431	NA	0	0	1	0	0	NA	0	0	0	NA	0	0	NA	NA	0	0	0	NA	NA	0	0	0	0	0	0	0	NA	0	0	0	NA	NA	1	chr4	134070369	134070370	chr4:134070369-134070370	LOC101927359, PCDH10,	1	1
cg18120376	NA	0	0	0	0	1	NA	0	0	0	NA	0	0	NA	NA	0	0	0	NA	NA	0	0	0	0	0	0	0	NA	0	0	0	NA	NA	1	chr4	142054254	142054255	chr4:142054254-142054255	RNF150,	1	0
cg10056356	NA	0	0	1	0	0	NA	0	0	0	NA	0	0	NA	NA	0	0	0	NA	NA	0	0	0	1	0	0	0	NA	0	0	0	NA	NA	2	chr4	144621898	144621899	chr4:144621898-144621899	FREM3,	1	0
cg02647878	NA	0	0	0	0	1	NA	0	0	0	NA	0	0	NA	NA	0	0	0	NA	NA	0	0	0	1	0	0	0	NA	0	0	0	NA	NA	2	chr4	154681197	154681198	chr4:154681197-154681198	RNF175,	1	0
cg05874561	NA	0	0	0	0	1	NA	0	0	0	NA	0	0	NA	NA	0	0	0	NA	NA	0	0	0	0	0	0	0	NA	0	0	0	NA	NA	1	chr4	154709828	154709829	chr4:154709828-154709829	SFRP2,	0	0
cg25645268	NA	0	0	0	0	0	NA	0	0	0	NA	0	0	NA	NA	0	0	0	NA	NA	0	0	0	1	0	0	0	NA	0	0	0	NA	NA	1	chr4	154710598	154710599	chr4:154710598-154710599	SFRP2,	0	0
cg22366088	NA	0	0	0	0	1	NA	0	0	0	NA	0	0	NA	NA	0	0	0	NA	NA	0	0	0	1	0	0	0	NA	0	0	0	NA	NA	2	chr4	154713789	154713790	chr4:154713789-154713790	SFRP2,	1	0
cg27662483	NA	0	0	0	0	0	NA	0	0	0	NA	0	0	NA	NA	0	0	0	NA	NA	0	0	0	1	0	0	0	NA	0	0	0	NA	NA	1	chr4	156588683	156588684	chr4:156588683-156588684	GUCY1A3,	1	0
cg17974378	NA	0	0	0	0	1	NA	0	0	0	NA	0	0	NA	NA	0	0	0	NA	NA	0	0	0	0	0	0	0	NA	0	0	0	NA	NA	1	chr4	156589039	156589040	chr4:156589039-156589040	GUCY1A3,	1	0
cg06217494	NA	0	0	0	0	1	NA	0	0	0	NA	0	0	NA	NA	0	0	0	NA	NA	0	0	0	1	0	0	0	NA	0	0	0	NA	NA	2	chr4	156680769	156680770	chr4:156680769-156680770	GUCY1B3,	1	0
cg08712866	NA	0	0	0	0	1	NA	0	0	0	NA	0	0	NA	NA	0	0	0	NA	NA	0	0	0	1	0	0	0	NA	0	0	0	NA	NA	2	chr4	157997526	157997527	chr4:157997526-157997527	GLRB,	1	0
cg09082903	NA	0	0	1	0	0	NA	0	0	0	NA	0	0	NA	NA	0	0	0	NA	NA	0	0	0	0	0	0	0	NA	0	0	0	NA	NA	1	chr4	164253207	164253208	chr4:164253207-164253208	NPY1R,	1	0
cg10341154	NA	0	0	1	0	0	NA	0	0	0	NA	0	0	NA	NA	0	0	0	NA	NA	0	0	0	0	0	0	0	NA	0	0	0	NA	NA	1	chr4	164265442	164265443	chr4:164265442-164265443	NPY5R,	1	0
cg12861945	NA	0	0	1	0	1	NA	0	0	0	NA	0	0	NA	NA	0	0	0	NA	NA	0	0	0	0	0	0	0	NA	0	0	0	NA	NA	2	chr4	165878085	165878086	chr4:165878085-165878086	TRIM61,	0	0
cg10756127	NA	0	0	0	0	1	NA	0	0	0	NA	0	0	NA	NA	0	0	0	NA	NA	0	0	0	0	0	0	0	NA	0	0	0	NA	NA	1	chr4	166795524	166795525	chr4:166795524-166795525	TLL1,	1	0
cg21155380	NA	0	0	0	0	1	NA	0	0	0	NA	0	0	NA	NA	0	0	0	NA	NA	0	0	0	1	0	0	0	NA	0	0	0	NA	NA	2	chr4	168155124	168155125	chr4:168155124-168155125	SPOCK3,	1	0
cg03304610	NA	0	0	1	0	0	NA	1	0	1	NA	0	0	NA	NA	0	0	0	NA	NA	0	0	0	0	0	0	0	NA	0	0	1	NA	NA	4	chr4	172734276	172734277	chr4:172734276-172734277	LOC441052,	1	1
cg19178853	NA	1	0	1	0	1	NA	0	0	0	NA	0	0	NA	NA	0	0	0	NA	NA	0	0	0	1	0	0	0	NA	0	0	0	NA	NA	4	chr4	174450408	174450409	chr4:174450408-174450409	HAND2, HAND2-AS1,	1	1
cg08576864	NA	0	0	0	0	1	NA	0	0	0	NA	0	0	NA	NA	0	0	0	NA	NA	0	0	0	0	0	0	0	NA	0	0	0	NA	NA	1	chr4	176922779	176922780	chr4:176922779-176922780	GPM6A,	1	1
cg21823999	NA	0	0	1	0	0	NA	0	0	0	NA	0	0	NA	NA	0	0	0	NA	NA	0	0	0	0	0	0	0	NA	0	0	0	NA	NA	1	chr4	176923081	176923082	chr4:176923081-176923082	GPM6A,	1	1
cg27486637	NA	0	0	1	0	1	NA	0	0	0	NA	0	0	NA	NA	0	0	0	NA	NA	0	0	0	0	0	0	0	NA	0	0	0	NA	NA	2	chr4	176987174	176987175	chr4:176987174-176987175	WDR17,	0	0
cg08684639	NA	0	0	0	0	0	NA	0	0	0	NA	0	0	NA	NA	0	0	0	NA	NA	0	0	0	1	0	0	0	NA	0	0	0	NA	NA	1	chr4	176987313	176987314	chr4:176987313-176987314	WDR17,	0	0
cg11354594	NA	0	0	0	0	1	NA	0	0	0	NA	0	0	NA	NA	0	0	0	NA	NA	0	0	0	1	0	0	0	NA	0	0	0	NA	NA	2	chr4	184826704	184826705	chr4:184826704-184826705	STOX2,	1	1
cg17428242	NA	0	0	0	0	1	NA	0	0	0	NA	0	0	NA	NA	0	0	0	NA	NA	0	0	0	0	0	0	0	NA	0	0	0	NA	NA	1	chr5	54263	54264	chr5:54263-54264	,	1	0
cg15131808	NA	0	0	0	0	1	NA	0	0	0	NA	0	0	NA	NA	0	0	0	NA	NA	0	0	0	0	0	0	0	NA	0	0	0	NA	NA	1	chr5	528580	528581	chr5:528580-528581	SLC9A3,	1	0
cg14732324	NA	1	0	1	1	0	NA	0	0	1	NA	0	0	NA	NA	0	1	0	NA	NA	0	0	0	0	0	0	0	NA	0	0	0	NA	NA	5	chr5	528621	528622	chr5:528621-528622	SLC9A3,	1	0
cg27348223	NA	0	0	0	0	0	NA	0	0	0	NA	0	0	NA	NA	0	0	0	NA	NA	0	0	0	1	0	0	0	NA	0	0	0	NA	NA	1	chr5	1445354	1445355	chr5:1445354-1445355	SLC6A3,	1	0
cg04210284	NA	0	0	1	0	0	NA	0	0	0	NA	0	0	NA	NA	0	0	0	NA	NA	0	0	0	0	0	0	0	NA	0	0	0	NA	NA	1	chr5	1445561	1445562	chr5:1445561-1445562	SLC6A3,	1	0
cg27037018	NA	0	0	0	0	1	NA	0	0	0	NA	0	0	NA	NA	0	0	0	NA	NA	0	0	0	0	0	0	0	NA	0	0	0	NA	NA	1	chr5	1445567	1445568	chr5:1445567-1445568	SLC6A3,	1	0
cg15658945	NA	0	0	0	0	1	NA	0	0	0	NA	0	0	NA	NA	0	0	0	NA	NA	0	0	0	0	0	0	0	NA	0	0	0	NA	NA	1	chr5	1667643	1667644	chr5:1667643-1667644	,	1	0
cg24876960	NA	0	0	0	0	1	NA	0	0	0	NA	0	0	NA	NA	0	0	0	NA	NA	0	0	0	1	0	0	0	NA	0	0	0	NA	NA	2	chr5	1883214	1883215	chr5:1883214-1883215	IRX4,	1	0
cg08235864	NA	0	0	0	0	0	NA	0	0	0	NA	0	0	NA	NA	0	0	0	NA	NA	0	0	0	0	0	0	0	NA	0	0	1	NA	NA	1	chr5	2751822	2751823	chr5:2751822-2751823	C5orf38, IRX2,	1	1
cg09740671	NA	0	0	1	0	0	NA	0	0	0	NA	0	0	NA	NA	0	0	0	NA	NA	0	0	0	0	0	0	0	NA	0	0	0	NA	NA	1	chr5	7396978	7396979	chr5:7396978-7396979	ADCY2,	0	0
cg02602541	NA	0	0	0	0	0	NA	0	0	0	NA	0	0	NA	NA	0	0	0	NA	NA	0	0	1	0	0	0	0	NA	0	0	0	NA	NA	1	chr5	7850438	7850439	chr5:7850438-7850439	C5orf49,	1	0
cg22560979	NA	0	0	0	0	1	NA	0	0	0	NA	0	0	NA	NA	0	0	0	NA	NA	0	0	0	0	0	0	0	NA	0	0	0	NA	NA	1	chr5	10565263	10565264	chr5:10565263-10565264	ANKRD33B,	1	0
cg06554120	NA	0	0	1	0	1	NA	0	0	0	NA	0	0	NA	NA	0	0	0	NA	NA	0	0	0	0	0	0	0	NA	0	0	0	NA	NA	2	chr5	11385067	11385068	chr5:11385067-11385068	CTNND2,	1	1
cg07195011	NA	0	0	1	0	0	NA	0	0	0	NA	0	0	NA	NA	0	0	0	NA	NA	0	0	0	0	0	0	0	NA	0	0	0	NA	NA	1	chr5	11904114	11904115	chr5:11904114-11904115	CTNND2,	1	1
cg14667871	NA	0	0	0	0	1	NA	0	0	0	NA	0	0	NA	NA	0	0	0	NA	NA	0	0	0	0	0	0	0	NA	0	0	0	NA	NA	1	chr5	15500833	15500834	chr5:15500833-15500834	FBXL7,	0	0
cg00339556	NA	0	0	1	0	1	NA	1	0	1	NA	0	0	NA	NA	0	0	0	NA	NA	0	0	0	0	0	0	0	NA	0	0	0	NA	NA	4	chr5	16180048	16180049	chr5:16180048-16180049	MARCH11,	1	0
cg01791874	NA	1	0	0	0	0	NA	0	0	0	NA	0	0	NA	NA	0	1	0	NA	NA	0	0	0	1	0	0	0	NA	0	0	0	NA	NA	3	chr5	16180055	16180056	chr5:16180055-16180056	MARCH11,	1	0
cg07663789	NA	0	0	0	0	1	NA	0	0	0	NA	0	0	NA	NA	0	0	0	NA	NA	0	0	0	0	0	0	0	NA	0	0	0	NA	NA	1	chr5	32711429	32711430	chr5:32711429-32711430	NPR3,	1	0
cg18689958	NA	0	0	0	0	1	NA	0	0	0	NA	0	0	NA	NA	0	0	0	NA	NA	0	0	0	0	0	0	0	NA	0	0	0	NA	NA	1	chr5	33936232	33936233	chr5:33936232-33936233	RXFP3,	1	0
cg13912115	NA	0	0	1	0	0	NA	0	0	1	NA	0	0	NA	NA	0	0	0	NA	NA	0	0	0	0	0	0	0	NA	0	0	0	NA	NA	2	chr5	33936362	33936363	chr5:33936362-33936363	RXFP3,	1	0
cg18237607	NA	0	0	0	0	1	NA	0	0	0	NA	0	0	NA	NA	0	0	0	NA	NA	0	0	0	1	0	0	0	NA	0	0	0	NA	NA	2	chr5	37840075	37840076	chr5:37840075-37840076	GDNF-AS1,	1	1
cg03205103	NA	0	0	1	1	0	NA	0	0	0	NA	0	0	NA	NA	0	0	0	NA	NA	0	0	0	0	0	0	0	NA	0	0	0	NA	NA	2	chr5	38257541	38257542	chr5:38257541-38257542	EGFLAM,	1	0
cg26747293	NA	0	0	0	0	1	NA	0	0	0	NA	0	0	NA	NA	0	0	0	NA	NA	0	0	0	0	0	0	0	NA	0	0	0	NA	NA	1	chr5	38258670	38258671	chr5:38258670-38258671	EGFLAM,	1	0
cg12587766	NA	0	0	0	0	1	NA	0	0	0	NA	0	0	NA	NA	0	0	0	NA	NA	0	0	0	0	0	0	0	NA	0	0	0	NA	NA	1	chr5	38556435	38556436	chr5:38556435-38556436	LIFR,	0	0
cg21889472	NA	0	0	0	0	0	NA	0	0	0	NA	0	0	NA	NA	0	0	0	NA	NA	0	0	0	0	0	1	0	NA	0	0	0	NA	NA	1	chr5	42992555	42992556	chr5:42992555-42992556	FLJ32255,	1	1
cg10864145	NA	0	0	0	0	0	NA	0	1	0	NA	0	0	NA	NA	0	0	0	NA	NA	0	0	0	0	0	0	0	NA	0	0	0	NA	NA	1	chr5	43397232	43397233	chr5:43397232-43397233	CCL28,	1	0
cg09489281	NA	0	0	0	0	0	NA	0	0	0	NA	0	0	NA	NA	0	0	0	NA	NA	0	0	1	0	0	0	0	NA	0	0	0	NA	NA	1	chr5	43604149	43604150	chr5:43604149-43604150	NNT,	1	0
cg05539745	NA	0	0	0	0	1	NA	0	0	0	NA	0	0	NA	NA	0	0	0	NA	NA	0	0	0	0	0	0	0	NA	0	0	0	NA	NA	1	chr5	45696455	45696456	chr5:45696455-45696456	HCN1,	0	0
cg19697475	NA	0	0	1	0	0	NA	0	0	0	NA	0	0	NA	NA	0	0	0	NA	NA	0	0	0	0	0	0	0	NA	0	0	0	NA	NA	1	chr5	45696465	45696466	chr5:45696465-45696466	HCN1,	0	0
cg13869401	NA	0	0	0	0	1	NA	0	0	0	NA	0	0	NA	NA	0	0	0	NA	NA	0	0	0	0	0	0	0	NA	0	0	0	NA	NA	1	chr5	54179537	54179538	chr5:54179537-54179538	,	1	0
cg23123909	NA	0	0	1	0	0	NA	0	0	0	NA	0	0	NA	NA	0	0	0	NA	NA	0	0	0	0	0	0	0	NA	0	0	0	NA	NA	1	chr5	57878953	57878954	chr5:57878953-57878954	RAB3C,	0	0
cg17318297	NA	0	0	0	0	1	NA	0	0	0	NA	0	0	NA	NA	0	0	0	NA	NA	0	0	0	0	0	0	0	NA	0	0	0	NA	NA	1	chr5	63802272	63802273	chr5:63802272-63802273	RGS7BP,	1	0
cg16079958	NA	0	0	0	0	0	NA	0	0	0	NA	0	0	NA	NA	0	0	0	NA	NA	0	0	1	0	0	0	0	NA	0	0	0	NA	NA	1	chr5	71404742	71404743	chr5:71404742-71404743	MAP1B,	0	0
cg08311610	NA	0	0	0	0	1	NA	0	0	0	NA	0	0	NA	NA	0	0	0	NA	NA	0	0	0	1	0	0	0	NA	0	0	0	NA	NA	2	chr5	76506759	76506760	chr5:76506759-76506760	PDE8B,	1	0
cg18035255	NA	0	0	1	0	0	NA	0	0	0	NA	0	0	NA	NA	0	0	0	NA	NA	0	0	0	0	0	0	0	NA	0	0	0	NA	NA	1	chr5	76933375	76933376	chr5:76933375-76933376	OTP,	1	0
cg13031251	NA	0	0	0	0	1	NA	0	0	0	NA	0	0	NA	NA	0	0	0	NA	NA	0	0	0	1	0	0	0	NA	0	0	0	NA	NA	2	chr5	77268734	77268735	chr5:77268734-77268735	,	1	0
cg00795341	NA	0	0	1	0	0	NA	0	0	0	NA	0	0	NA	NA	0	0	0	NA	NA	0	0	1	0	0	0	0	NA	0	0	0	NA	NA	2	chr5	79330929	79330930	chr5:79330929-79330930	THBS4,	1	0
cg07690181	NA	0	0	0	0	1	NA	0	0	0	NA	0	0	NA	NA	0	0	0	NA	NA	0	0	0	1	0	0	0	NA	0	0	0	NA	NA	2	chr5	83679643	83679644	chr5:83679643-83679644	EDIL3,	0	0
cg27087622	NA	0	0	1	0	0	NA	1	0	0	NA	0	0	NA	NA	0	0	0	NA	NA	0	0	0	0	0	0	1	NA	0	0	0	NA	NA	3	chr5	87970114	87970115	chr5:87970114-87970115	LINC00461,	1	1
cg10571951	NA	0	0	1	0	1	NA	0	0	0	NA	0	0	NA	NA	0	0	0	NA	NA	0	0	0	0	0	0	0	NA	0	0	0	NA	NA	2	chr5	88185387	88185388	chr5:88185387-88185388	MEF2C, MEF2C-AS1,	1	1
cg20415170	NA	0	0	0	0	0	NA	0	1	0	NA	0	0	NA	NA	0	0	0	NA	NA	0	0	0	0	0	0	0	NA	0	0	0	NA	NA	1	chr5	95298066	95298067	chr5:95298066-95298067	LOC101929710,	1	1
cg03975797	NA	0	0	0	0	1	NA	0	0	0	NA	0	0	NA	NA	0	0	0	NA	NA	0	0	0	0	0	0	0	NA	0	0	0	NA	NA	1	chr5	100238977	100238978	chr5:100238977-100238978	ST8SIA4,	1	0
cg26337020	NA	0	0	1	0	0	NA	0	0	0	NA	0	0	NA	NA	0	0	0	NA	NA	0	0	0	0	0	0	0	NA	0	0	0	NA	NA	1	chr5	100239022	100239023	chr5:100239022-100239023	ST8SIA4,	1	0
cg06480736	NA	0	0	1	0	0	NA	0	0	0	NA	0	0	NA	NA	0	0	0	NA	NA	0	0	0	0	0	0	0	NA	0	0	0	NA	NA	1	chr5	101632321	101632322	chr5:101632321-101632322	SLCO4C1,	1	0
cg04621020	NA	0	0	0	0	0	NA	0	1	0	NA	0	0	NA	NA	0	0	0	NA	NA	0	0	0	0	0	0	1	NA	0	0	0	NA	NA	2	chr5	101632341	101632342	chr5:101632341-101632342	SLCO4C1,	1	0
cg17671005	NA	0	0	1	0	1	NA	0	0	0	NA	0	0	NA	NA	0	0	0	NA	NA	0	0	0	1	0	0	0	NA	0	0	0	NA	NA	3	chr5	113391774	113391775	chr5:113391774-113391775	,	1	0
cg12373617	NA	0	0	1	0	0	NA	0	0	0	NA	0	0	NA	NA	0	0	0	NA	NA	0	0	0	0	0	0	0	NA	0	0	0	NA	NA	1	chr5	113698140	113698141	chr5:113698140-113698141	KCNN2,	0	0
cg16707405	NA	0	0	0	0	0	NA	0	0	0	NA	0	0	NA	NA	0	0	0	NA	NA	0	0	0	0	0	0	0	NA	0	0	1	NA	NA	1	chr5	115152413	115152414	chr5:115152413-115152414	CDO1,	1	1
cg08516516	NA	1	0	1	0	0	NA	0	0	1	NA	0	0	NA	NA	0	0	0	NA	NA	0	0	0	0	0	0	0	NA	0	0	0	NA	NA	3	chr5	115152492	115152493	chr5:115152492-115152493	CDO1,	1	1
cg22003366	NA	0	0	0	0	1	NA	0	0	0	NA	0	0	NA	NA	0	0	0	NA	NA	0	0	0	0	0	0	0	NA	0	0	0	NA	NA	1	chr5	119800143	119800144	chr5:119800143-119800144	PRR16,	1	0
cg03721362	NA	0	0	1	0	0	NA	0	0	0	NA	0	0	NA	NA	0	0	0	NA	NA	0	0	0	0	0	0	0	NA	0	0	0	NA	NA	1	chr5	126626298	126626299	chr5:126626298-126626299	MEGF10,	0	0
cg06993118	NA	0	0	0	0	1	NA	0	0	0	NA	0	0	NA	NA	0	0	0	NA	NA	0	0	0	1	0	0	0	NA	0	0	0	NA	NA	2	chr5	127873980	127873981	chr5:127873980-127873981	FBN2,	1	0
cg09052453	NA	0	0	1	0	0	NA	0	0	0	NA	0	0	NA	NA	0	0	0	NA	NA	0	0	0	0	0	0	0	NA	0	0	0	NA	NA	1	chr5	128796097	128796098	chr5:128796097-128796098	ADAMTS19, ADAMTS19-AS1,	0	1
cg13557668	NA	0	0	0	0	1	NA	0	0	0	NA	0	0	NA	NA	0	0	0	NA	NA	0	0	0	0	0	0	0	NA	0	0	0	NA	NA	1	chr5	135265931	135265932	chr5:135265931-135265932	FBXL21,	1	1
cg01283246	NA	1	0	1	0	0	NA	0	0	0	NA	0	0	NA	NA	0	0	0	NA	NA	0	0	0	1	0	0	0	NA	0	0	0	NA	NA	3	chr5	135266135	135266136	chr5:135266135-135266136	FBXL21,	1	1
cg14650610	NA	0	0	0	0	1	NA	0	0	0	NA	0	0	NA	NA	0	0	0	NA	NA	0	0	0	1	0	0	0	NA	0	0	0	NA	NA	2	chr5	136834492	136834493	chr5:136834492-136834493	SPOCK1,	1	0
cg20560075	NA	0	0	0	0	1	NA	0	0	0	NA	0	0	NA	NA	0	0	0	NA	NA	0	0	0	0	0	0	0	NA	0	0	0	NA	NA	1	chr5	146257484	146257485	chr5:146257484-146257485	PPP2R2B,	1	1
cg07723130	NA	0	0	0	0	0	NA	0	0	0	NA	0	0	NA	NA	0	0	0	NA	NA	0	0	0	1	0	0	0	NA	0	0	0	NA	NA	1	chr5	146889538	146889539	chr5:146889538-146889539	DPYSL3,	1	0
cg07682547	NA	0	0	1	0	0	NA	0	0	0	NA	0	0	NA	NA	0	0	0	NA	NA	0	0	0	0	0	0	0	NA	0	0	0	NA	NA	1	chr5	153863417	153863418	chr5:153863417-153863418	,	1	0
cg00251610	NA	0	0	1	0	0	NA	0	0	0	NA	0	0	NA	NA	0	0	0	NA	NA	0	0	0	0	0	0	0	NA	0	0	0	NA	NA	1	chr5	158527817	158527818	chr5:158527817-158527818	LINC02202,	1	1
cg11444704	NA	0	0	0	0	0	NA	0	0	0	NA	0	0	NA	NA	0	0	0	NA	NA	0	0	1	0	0	0	0	NA	0	0	0	NA	NA	1	chr5	159738916	159738917	chr5:159738916-159738917	CCNJL,	0	1
cg16509658	NA	0	0	1	0	0	NA	0	0	0	NA	0	0	NA	NA	0	0	0	NA	NA	0	0	0	0	0	0	0	NA	0	0	0	NA	NA	1	chr5	160975347	160975348	chr5:160975347-160975348	GABRB2,	1	0
cg14743594	NA	0	0	0	0	1	NA	0	0	0	NA	0	0	NA	NA	0	0	0	NA	NA	0	0	0	1	0	0	0	NA	0	0	0	NA	NA	2	chr5	167956394	167956395	chr5:167956394-167956395	FBLL1,	1	1
cg11732619	NA	0	0	0	0	1	NA	0	0	0	NA	0	0	NA	NA	0	0	0	NA	NA	0	0	0	1	0	0	0	NA	0	0	0	NA	NA	2	chr5	168728076	168728077	chr5:168728076-168728077	SLIT3,	1	0
cg23338503	NA	0	0	0	0	0	NA	0	0	0	NA	0	0	NA	NA	0	0	0	NA	NA	0	0	1	0	0	0	0	NA	0	0	0	NA	NA	1	chr5	169064530	169064531	chr5:169064530-169064531	DOCK2,	1	0
cg06008926	NA	0	0	1	0	0	NA	0	0	0	NA	0	0	NA	NA	0	0	0	NA	NA	0	0	0	0	0	0	0	NA	0	0	0	NA	NA	1	chr5	170740673	170740674	chr5:170740673-170740674	TLX3,	1	0
cg17483297	NA	0	0	0	0	1	NA	0	0	0	NA	0	0	NA	NA	0	0	0	NA	NA	0	0	0	0	0	0	0	NA	0	0	0	NA	NA	1	chr5	175084743	175084744	chr5:175084743-175084744	HRH2,	1	0
cg23409774	NA	0	0	1	0	0	NA	0	0	0	NA	0	0	NA	NA	0	0	0	NA	NA	0	0	0	0	0	0	0	NA	0	0	0	NA	NA	1	chr5	175300141	175300142	chr5:175300141-175300142	CPLX2,	1	0
cg25552435	NA	0	0	0	0	0	NA	0	0	0	NA	0	0	NA	NA	0	0	0	NA	NA	0	0	0	1	0	0	0	NA	0	0	0	NA	NA	1	chr5	178017300	178017301	chr5:178017300-178017301	COL23A1,	1	0
cg23437733	NA	0	0	0	0	1	NA	0	0	0	NA	0	0	NA	NA	0	0	0	NA	NA	0	0	0	0	0	0	0	NA	0	0	0	NA	NA	1	chr5	178017571	178017572	chr5:178017571-178017572	COL23A1,	1	0
cg14409941	NA	0	0	0	0	1	NA	0	0	0	NA	0	0	NA	NA	0	0	0	NA	NA	0	0	0	1	0	0	0	NA	0	0	0	NA	NA	2	chr5	178771781	178771782	chr5:178771781-178771782	ADAMTS2,	1	0
cg18652367	NA	0	0	0	0	0	NA	0	0	0	NA	0	0	NA	NA	0	0	0	NA	NA	0	0	1	0	0	0	0	NA	0	0	0	NA	NA	1	chr5	180017689	180017690	chr5:180017689-180017690	SCGB3A1,	1	0
cg05766140	NA	0	0	1	0	1	NA	0	0	0	NA	0	0	NA	NA	0	0	0	NA	NA	0	0	0	1	0	0	0	NA	0	0	0	NA	NA	3	chr6	391743	391744	chr6:391743-391744	IRF4,	1	1
cg17228900	NA	1	0	0	0	0	NA	0	0	0	NA	0	0	NA	NA	0	0	0	NA	NA	0	0	0	0	0	0	0	NA	0	0	0	NA	NA	1	chr6	391764	391765	chr6:391764-391765	IRF4,	1	1
cg21277995	NA	0	0	0	0	0	NA	0	0	0	NA	0	0	NA	NA	0	0	0	NA	NA	0	0	0	0	0	0	1	NA	0	0	0	NA	NA	1	chr6	393239	393240	chr6:393239-393240	IRF4,	1	1
cg17618595	NA	0	0	0	0	0	NA	0	0	0	NA	0	0	NA	NA	0	0	0	NA	NA	0	0	0	0	0	1	0	NA	0	0	0	NA	NA	1	chr6	1311342	1311343	chr6:1311342-1311343	FOXQ1,	1	0
cg05872706	NA	0	0	0	0	0	NA	0	0	0	NA	0	0	NA	NA	0	0	0	NA	NA	0	0	0	0	0	1	0	NA	0	0	0	NA	NA	1	chr6	1383982	1383983	chr6:1383982-1383983	,	1	0
cg02547269	NA	0	0	0	0	1	NA	0	0	0	NA	0	0	NA	NA	0	0	0	NA	NA	0	0	0	0	0	0	0	NA	0	0	0	NA	NA	1	chr6	1390361	1390362	chr6:1390361-1390362	FOXF2,	1	0
cg25003777	NA	0	0	0	0	0	NA	0	0	0	NA	0	0	NA	NA	0	0	0	NA	NA	0	0	1	0	0	0	0	NA	0	0	0	NA	NA	1	chr6	2841626	2841627	chr6:2841626-2841627	SERPINB1,	0	1
cg25026237	NA	0	0	0	0	0	NA	0	1	0	NA	0	0	NA	NA	0	0	0	NA	NA	0	0	0	0	0	0	0	NA	0	0	0	NA	NA	1	chr6	4775638	4775639	chr6:4775638-4775639	CDYL,	1	1
cg20817483	NA	0	0	1	0	0	NA	0	0	0	NA	0	0	NA	NA	0	0	0	NA	NA	0	0	0	0	0	0	0	NA	0	0	0	NA	NA	1	chr6	5851644	5851645	chr6:5851644-5851645	,	1	0
cg24720571	NA	1	0	1	0	0	NA	0	0	0	NA	0	0	NA	NA	0	0	0	NA	NA	0	0	0	0	0	0	0	NA	0	0	0	NA	NA	2	chr6	6004328	6004329	chr6:6004328-6004329	NRN1,	1	0
cg11564981	NA	0	0	1	1	0	NA	0	0	0	NA	0	0	NA	NA	0	0	0	NA	NA	0	0	0	0	0	0	0	NA	0	0	0	NA	NA	2	chr6	6007670	6007671	chr6:6007670-6007671	NRN1,	1	0
cg14250833	NA	0	0	1	0	1	NA	0	0	0	NA	0	0	NA	NA	0	0	0	NA	NA	0	0	1	1	0	0	0	NA	0	0	0	NA	NA	4	chr6	10882240	10882241	chr6:10882240-10882241	GCM2, SYCP2L,	1	0
cg26237681	NA	1	0	0	0	1	NA	0	0	0	NA	0	0	NA	NA	0	0	0	NA	NA	0	0	0	1	0	0	0	NA	0	0	0	NA	NA	3	chr6	10887185	10887186	chr6:10887185-10887186	SYCP2L,	1	0
cg13562911	NA	0	0	0	0	1	NA	0	0	0	NA	0	0	NA	NA	0	0	0	NA	NA	0	0	0	0	0	0	0	NA	0	0	0	NA	NA	1	chr6	11044106	11044107	chr6:11044106-11044107	ELOVL2, ELOVL2-AS1,	1	1
cg22143569	NA	0	0	0	0	0	NA	0	0	0	NA	0	0	NA	NA	0	0	0	NA	NA	0	0	0	1	0	0	0	NA	0	0	0	NA	NA	1	chr6	11044541	11044542	chr6:11044541-11044542	ELOVL2, ELOVL2-AS1,	1	1
cg09535605	NA	0	0	1	0	1	NA	0	0	0	NA	0	0	NA	NA	0	0	0	NA	NA	0	0	0	0	0	0	0	NA	0	0	0	NA	NA	2	chr6	17281327	17281328	chr6:17281327-17281328	RBM24,	1	0
cg27635394	NA	0	0	0	0	0	NA	0	0	0	NA	0	0	NA	NA	0	0	0	NA	NA	0	0	0	0	0	0	0	NA	0	0	1	NA	NA	1	chr6	26043820	26043821	chr6:26043820-26043821	HIST1H2BB,	0	0
cg19320816	NA	0	0	0	0	0	NA	0	0	0	NA	0	0	NA	NA	0	0	0	NA	NA	0	0	1	0	0	0	0	NA	0	0	0	NA	NA	1	chr6	26087776	26087777	chr6:26087776-26087777	HFE, LOC108783645,	0	1
cg01272707	NA	0	0	0	0	0	NA	0	0	0	NA	0	0	NA	NA	0	0	0	NA	NA	0	0	1	0	0	0	0	NA	0	0	0	NA	NA	1	chr6	26172185	26172186	chr6:26172185-26172186	HIST1H2BD,	0	0
cg21026663	NA	0	0	0	0	0	NA	0	0	0	NA	0	0	NA	NA	0	0	0	NA	NA	0	0	1	0	0	0	0	NA	0	0	0	NA	NA	1	chr6	26189234	26189235	chr6:26189234-26189235	HIST1H4D,	0	0
cg15386964	NA	0	0	0	1	0	NA	0	0	0	NA	0	0	NA	NA	0	0	0	NA	NA	0	0	0	0	0	0	0	NA	0	0	0	NA	NA	1	chr6	26250685	26250686	chr6:26250685-26250686	HIST1H3F,	0	0
cg01563704	NA	0	0	0	1	0	NA	0	0	0	NA	0	0	NA	NA	0	0	0	NA	NA	0	0	0	0	0	0	0	NA	0	0	0	NA	NA	1	chr6	26271816	26271817	chr6:26271816-26271817	HIST1H2BI, HIST1H3G,	0	0
cg03204678	NA	0	0	0	0	0	NA	0	0	0	NA	0	0	NA	NA	0	0	1	NA	NA	0	0	0	0	0	0	0	NA	0	0	0	NA	NA	1	chr6	26614535	26614536	chr6:26614535-26614536	,	1	0
cg11183365	NA	0	0	0	0	0	NA	0	0	0	NA	0	0	NA	NA	0	0	0	NA	NA	0	0	0	0	0	0	0	NA	0	0	1	NA	NA	1	chr6	27064769	27064770	chr6:27064769-27064770	,	0	0
cg12298212	NA	0	0	0	0	0	NA	0	0	0	NA	0	0	NA	NA	0	0	0	NA	NA	0	0	1	0	0	0	0	NA	0	0	0	NA	NA	1	chr6	27065003	27065004	chr6:27065003-27065004	,	0	0
cg02585598	NA	0	0	0	0	0	NA	0	0	0	NA	0	0	NA	NA	0	0	0	NA	NA	0	0	0	0	0	1	0	NA	0	0	0	NA	NA	1	chr6	27125472	27125473	chr6:27125472-27125473	,	0	0
cg14983586	NA	0	0	1	0	0	NA	0	0	0	NA	0	0	NA	NA	0	0	0	NA	NA	0	0	0	0	0	0	0	NA	0	0	0	NA	NA	1	chr6	27206503	27206504	chr6:27206503-27206504	,	1	0
cg25666433	NA	0	0	0	0	0	NA	0	0	0	NA	0	0	NA	NA	0	0	0	NA	NA	0	0	1	0	0	0	0	NA	0	0	0	NA	NA	1	chr6	28367279	28367280	chr6:28367279-28367280	ZSCAN12,	0	1
cg25060829	NA	0	0	0	0	0	NA	0	0	0	NA	0	0	NA	NA	0	0	0	NA	NA	0	0	0	0	0	0	0	NA	0	0	1	NA	NA	1	chr6	28367571	28367572	chr6:28367571-28367572	ZSCAN12,	0	1
cg07838603	NA	0	0	1	0	0	NA	0	0	0	NA	0	0	NA	NA	0	0	0	NA	NA	0	0	0	1	0	0	0	NA	0	0	0	NA	NA	2	chr6	28411030	28411031	chr6:28411030-28411031	ZSCAN23,	0	0
cg26389727	NA	0	0	1	0	0	NA	0	0	0	NA	0	0	NA	NA	0	0	0	NA	NA	0	0	0	0	0	0	0	NA	0	0	0	NA	NA	1	chr6	28510283	28510284	chr6:28510283-28510284	,	0	0
cg15051226	NA	0	0	1	0	0	NA	0	0	0	NA	0	0	NA	NA	0	0	0	NA	NA	0	0	0	0	0	0	0	NA	0	0	0	NA	NA	1	chr6	28555118	28555119	chr6:28555118-28555119	ZBED9,	0	0
cg14103680	NA	0	0	1	0	1	NA	0	0	1	NA	0	0	NA	NA	0	0	0	NA	NA	0	0	0	0	0	0	0	NA	0	0	0	NA	NA	3	chr6	28603059	28603060	chr6:28603059-28603060	,	1	0
cg01196517	NA	0	0	0	0	0	NA	0	0	0	NA	0	0	NA	NA	0	0	0	NA	NA	0	0	0	1	0	0	0	NA	0	0	0	NA	NA	1	chr6	28642394	28642395	chr6:28642394-28642395	,	0	0
cg11400401	NA	0	0	1	0	0	NA	0	0	0	NA	0	0	NA	NA	0	0	0	NA	NA	0	0	0	0	0	0	0	NA	0	0	0	NA	NA	1	chr6	28762552	28762553	chr6:28762552-28762553	,	1	0
cg26069562	NA	0	0	0	0	0	NA	0	0	0	NA	0	0	NA	NA	0	0	0	NA	NA	0	0	1	0	0	0	0	NA	0	0	0	NA	NA	1	chr6	29691981	29691982	chr6:29691981-29691982	HLA-F,	1	0
cg14443519	NA	0	0	0	0	0	NA	0	0	0	NA	0	0	NA	NA	0	0	0	NA	NA	0	0	0	0	0	0	0	NA	0	0	1	NA	NA	1	chr6	29760410	29760411	chr6:29760410-29760411	HCG4, LOC554223,	1	1
cg11232276	NA	0	0	0	0	1	NA	0	0	0	NA	0	0	NA	NA	0	0	0	NA	NA	0	0	0	1	0	0	0	NA	0	0	0	NA	NA	2	chr6	29760782	29760783	chr6:29760782-29760783	HCG4, LOC554223,	1	1
cg26268701	NA	0	0	0	0	0	NA	0	0	0	NA	0	0	NA	NA	0	0	0	NA	NA	0	0	0	0	0	0	0	NA	0	0	1	NA	NA	1	chr6	29894737	29894738	chr6:29894737-29894738	HCG4B,	0	1
cg05019905	NA	0	0	0	0	0	NA	0	0	0	NA	0	0	NA	NA	0	0	0	NA	NA	0	0	1	0	0	0	0	NA	0	0	0	NA	NA	1	chr6	29894831	29894832	chr6:29894831-29894832	HCG4B,	0	1
cg16794576	NA	0	0	0	0	0	NA	0	0	0	NA	0	0	NA	NA	0	0	0	NA	NA	0	0	1	0	0	0	0	NA	0	0	0	NA	NA	1	chr6	29974971	29974972	chr6:29974971-29974972	HLA-J, ZNRD1ASP,	1	1
cg15407528	NA	0	0	0	0	1	NA	0	0	0	NA	0	0	NA	NA	0	0	0	NA	NA	0	0	1	0	0	0	0	NA	0	0	0	NA	NA	2	chr6	30418985	30418986	chr6:30418985-30418986	,	1	0
cg10938374	NA	0	0	0	0	0	NA	0	1	0	NA	0	0	NA	NA	0	0	0	NA	NA	0	0	0	0	0	0	0	NA	0	0	0	NA	NA	1	chr6	30712058	30712059	chr6:30712058-30712059	IER3,	0	0
cg17990771	NA	0	0	0	0	0	NA	0	0	0	NA	0	0	NA	NA	0	0	0	NA	NA	0	0	1	0	0	0	0	NA	0	0	0	NA	NA	1	chr6	32223226	32223227	chr6:32223226-32223227	LOC101929163,	0	1
cg22014661	NA	0	0	1	0	0	NA	0	0	1	NA	0	0	NA	NA	0	0	0	NA	NA	0	0	0	0	0	0	0	NA	0	0	0	NA	NA	2	chr6	62996130	62996131	chr6:62996130-62996131	KHDRBS2,	0	0
cg18884037	NA	0	0	0	0	1	NA	1	0	0	NA	0	0	NA	NA	0	0	0	NA	NA	0	0	0	0	0	0	0	NA	0	0	0	NA	NA	2	chr6	62996214	62996215	chr6:62996214-62996215	KHDRBS2,	0	0
cg16556906	NA	0	0	0	0	1	NA	0	0	0	NA	0	0	NA	NA	0	0	0	NA	NA	0	0	0	0	0	0	0	NA	0	0	0	NA	NA	1	chr6	71666682	71666683	chr6:71666682-71666683	B3GAT2,	1	0
cg02916312	NA	0	0	0	0	1	NA	0	0	0	NA	0	0	NA	NA	0	0	0	NA	NA	0	0	0	0	0	0	0	NA	0	0	0	NA	NA	1	chr6	72596135	72596136	chr6:72596135-72596136	RIMS1,	0	0
cg05447008	NA	0	0	0	0	0	NA	0	0	0	NA	0	0	NA	NA	0	0	0	NA	NA	0	0	0	0	0	0	1	NA	0	0	0	NA	NA	1	chr6	73331114	73331115	chr6:73331114-73331115	KCNQ5,	1	0
cg11008243	NA	0	0	0	0	1	NA	0	0	0	NA	0	0	NA	NA	0	0	0	NA	NA	0	0	0	1	0	0	0	NA	0	0	0	NA	NA	2	chr6	73331238	73331239	chr6:73331238-73331239	KCNQ5,	1	0
cg23424273	NA	0	0	1	0	0	NA	0	0	0	NA	0	0	NA	NA	0	0	0	NA	NA	0	0	0	0	0	0	0	NA	0	0	0	NA	NA	1	chr6	78173227	78173228	chr6:78173227-78173228	HTR1B,	1	0
cg18132916	NA	0	0	0	0	0	NA	0	1	0	NA	0	0	NA	NA	0	0	0	NA	NA	0	0	0	0	0	0	0	NA	0	0	0	NA	NA	1	chr6	79620363	79620364	chr6:79620363-79620364	,	1	0
cg11833968	NA	0	0	0	0	0	NA	0	0	0	NA	0	0	NA	NA	0	0	0	NA	NA	0	0	1	0	0	0	0	NA	0	0	0	NA	NA	1	chr6	79620685	79620686	chr6:79620685-79620686	,	1	0
cg21688264	NA	0	0	0	0	0	NA	0	0	0	NA	0	0	NA	NA	0	0	0	NA	NA	0	0	0	1	0	0	0	NA	0	0	0	NA	NA	1	chr6	84418724	84418725	chr6:84418724-84418725	SNAP91,	1	0
cg17767285	NA	0	0	0	0	1	NA	0	0	0	NA	0	0	NA	NA	0	0	0	NA	NA	0	0	0	0	0	0	0	NA	0	0	0	NA	NA	1	chr6	84419202	84419203	chr6:84419202-84419203	LOC105377879,	1	1
cg05384102	NA	0	0	1	0	0	NA	0	0	0	NA	0	0	NA	NA	0	0	0	NA	NA	0	0	0	0	0	0	0	NA	0	0	0	NA	NA	1	chr6	84419329	84419330	chr6:84419329-84419330	LOC105377879,	1	1
cg08154348	NA	0	0	0	0	0	NA	0	0	0	NA	0	0	NA	NA	0	0	0	NA	NA	0	0	0	1	0	0	0	NA	0	0	0	NA	NA	1	chr6	84562930	84562931	chr6:84562930-84562931	RIPPLY2,	1	1
cg14774364	NA	0	0	1	0	0	NA	0	0	0	NA	0	0	NA	NA	0	0	0	NA	NA	0	0	0	1	0	0	0	NA	0	0	0	NA	NA	2	chr6	87647370	87647371	chr6:87647370-87647371	HTR1E,	1	0
cg14186641	NA	0	0	0	0	0	NA	0	0	0	NA	0	0	NA	NA	0	0	0	NA	NA	0	0	0	0	0	0	1	NA	0	0	0	NA	NA	1	chr6	88876741	88876742	chr6:88876741-88876742	CNR1,	1	0
cg04207385	NA	0	0	0	0	0	NA	0	1	0	NA	0	0	NA	NA	0	0	0	NA	NA	0	0	0	0	0	0	0	NA	0	0	0	NA	NA	1	chr6	88877064	88877065	chr6:88877064-88877065	CNR1,	1	0
cg06740629	NA	0	0	1	0	0	NA	0	0	0	NA	0	0	NA	NA	0	0	0	NA	NA	0	0	0	0	0	0	0	NA	0	0	0	NA	NA	1	chr6	94129627	94129628	chr6:94129627-94129628	EPHA7,	1	0
cg17073273	NA	0	0	0	0	0	NA	0	0	0	NA	0	0	NA	NA	0	0	0	NA	NA	0	0	0	0	0	1	0	NA	0	0	0	NA	NA	1	chr6	99279795	99279796	chr6:99279795-99279796	POU3F2,	1	0
cg04670802	NA	0	0	0	0	0	NA	0	0	1	NA	0	0	NA	NA	0	0	0	NA	NA	0	0	0	0	0	1	0	NA	0	0	0	NA	NA	2	chr6	100050812	100050813	chr6:100050812-100050813	PRDM13,	1	0
cg06558014	NA	0	1	1	1	0	NA	0	0	0	NA	0	0	NA	NA	0	0	0	NA	NA	0	0	0	0	0	0	0	NA	0	0	0	NA	NA	3	chr6	100051116	100051117	chr6:100051116-100051117	PRDM13,	1	0
cg19391276	NA	0	0	1	0	0	NA	0	0	0	NA	0	0	NA	NA	0	0	0	NA	NA	0	0	0	0	0	0	0	NA	0	0	0	NA	NA	1	chr6	100055785	100055786	chr6:100055785-100055786	PRDM13,	1	0
cg25280433	NA	0	0	0	0	0	NA	0	0	0	NA	0	0	NA	NA	0	0	0	NA	NA	0	0	0	1	0	0	0	NA	0	0	0	NA	NA	1	chr6	105584216	105584217	chr6:105584216-105584217	BVES,	1	0
cg14159026	NA	0	0	0	0	1	NA	0	0	0	NA	0	0	NA	NA	0	0	0	NA	NA	0	0	0	0	0	0	0	NA	0	0	0	NA	NA	1	chr6	105584551	105584552	chr6:105584551-105584552	BVES,	1	0
cg21239311	NA	0	0	1	0	0	NA	0	0	0	NA	0	0	NA	NA	0	0	0	NA	NA	0	0	0	0	0	0	0	NA	0	0	0	NA	NA	1	chr6	108486007	108486008	chr6:108486007-108486008	NR2E1,	1	0
cg25146017	NA	0	0	0	0	1	NA	0	0	0	NA	0	0	NA	NA	0	0	0	NA	NA	0	0	0	1	0	0	0	NA	0	0	0	NA	NA	2	chr6	110679400	110679401	chr6:110679400-110679401	METTL24,	1	0
cg02026062	NA	0	0	1	0	0	NA	0	0	0	NA	0	0	NA	NA	0	0	0	NA	NA	0	0	1	0	0	0	0	NA	0	0	0	NA	NA	2	chr6	117086479	117086480	chr6:117086479-117086480	FAM162B,	1	0
cg07641160	NA	0	0	0	0	1	NA	0	0	0	NA	0	0	NA	NA	0	0	0	NA	NA	0	0	0	1	0	0	0	NA	0	0	0	NA	NA	2	chr6	117086850	117086851	chr6:117086850-117086851	FAM162B,	1	0
cg11430157	NA	0	0	0	0	1	NA	0	0	0	NA	0	0	NA	NA	0	0	0	NA	NA	0	0	0	0	0	0	0	NA	0	0	0	NA	NA	1	chr6	118228869	118228870	chr6:118228869-118228870	SLC35F1,	1	0
cg01995743	NA	0	0	1	0	0	NA	0	0	1	NA	0	0	NA	NA	0	0	0	NA	NA	0	0	0	0	0	0	0	NA	0	0	0	NA	NA	2	chr6	118229732	118229733	chr6:118229732-118229733	SLC35F1,	1	0
cg17160382	NA	0	0	0	0	0	NA	0	0	0	NA	0	0	NA	NA	0	0	0	NA	NA	0	0	0	0	0	1	0	NA	0	0	0	NA	NA	1	chr6	121758980	121758981	chr6:121758980-121758981	GJA1,	0	0
cg18210226	NA	0	0	1	0	0	NA	0	0	1	NA	0	0	NA	NA	0	0	0	NA	NA	0	0	0	0	0	0	0	NA	0	0	0	NA	NA	2	chr6	123317714	123317715	chr6:123317714-123317715	CLVS2,	1	0
cg06993703	NA	0	0	0	0	0	NA	0	0	0	NA	0	0	NA	NA	0	0	0	NA	NA	0	0	0	1	0	0	0	NA	0	0	0	NA	NA	1	chr6	125284359	125284360	chr6:125284359-125284360	RNF217,	0	1
cg01043019	NA	0	0	0	0	1	NA	0	0	0	NA	0	0	NA	NA	0	0	0	NA	NA	0	0	0	0	0	0	0	NA	0	0	0	NA	NA	1	chr6	127440510	127440511	chr6:127440510-127440511	RSPO3,	1	0
cg11664500	NA	0	0	0	0	1	NA	0	0	0	NA	0	0	NA	NA	0	0	0	NA	NA	0	0	1	1	0	0	0	NA	0	0	0	NA	NA	3	chr6	133562479	133562480	chr6:133562479-133562480	EYA4,	1	0
cg13255096	NA	0	0	0	0	0	NA	0	0	0	NA	0	0	NA	NA	0	0	0	NA	NA	0	0	0	0	0	1	0	NA	0	0	0	NA	NA	1	chr6	137112939	137112940	chr6:137112939-137112940	MAP3K5,	1	0
cg26870192	NA	0	0	0	0	0	NA	0	0	0	NA	0	0	NA	NA	0	0	0	NA	NA	0	0	1	0	0	0	0	NA	0	0	0	NA	NA	1	chr6	137242062	137242063	chr6:137242062-137242063	SLC35D3,	1	0
cg19003797	NA	0	0	1	0	0	NA	0	0	0	NA	0	0	NA	NA	0	0	0	NA	NA	0	0	0	0	0	0	0	NA	0	0	0	NA	NA	1	chr6	137819267	137819268	chr6:137819267-137819268	OLIG3,	1	0
cg23095615	NA	0	0	0	0	0	NA	0	0	0	NA	0	0	NA	NA	0	0	0	NA	NA	0	0	1	0	0	0	0	NA	0	0	0	NA	NA	1	chr6	146136563	146136564	chr6:146136563-146136564	LOC100507557,	0	1
cg03114255	NA	0	0	1	0	0	NA	0	0	0	NA	0	0	NA	NA	0	0	0	NA	NA	0	0	0	0	0	0	0	NA	0	0	0	NA	NA	1	chr6	150358985	150358986	chr6:150358985-150358986	,	1	0
cg23931421	NA	0	0	0	0	1	NA	0	0	0	NA	0	0	NA	NA	0	0	0	NA	NA	0	0	0	1	0	0	0	NA	0	0	0	NA	NA	2	chr6	152957999	152958000	chr6:152957999-152958000	SYNE1,	1	0
cg09854653	NA	0	0	0	0	0	NA	0	0	0	NA	0	0	NA	NA	0	0	0	NA	NA	0	0	0	1	0	0	0	NA	0	0	0	NA	NA	1	chr6	163834903	163834904	chr6:163834903-163834904	CAHM,	0	1
cg00622837	NA	0	0	1	0	1	NA	0	0	0	NA	0	0	NA	NA	0	0	0	NA	NA	0	0	0	0	0	0	0	NA	0	0	0	NA	NA	2	chr6	166421992	166421993	chr6:166421992-166421993	,	1	0
cg05194447	NA	0	0	1	0	0	NA	0	0	0	NA	0	0	NA	NA	0	0	0	NA	NA	0	0	0	0	0	0	0	NA	0	0	0	NA	NA	1	chr6	166511577	166511578	chr6:166511577-166511578	,	0	0
cg06463958	NA	1	1	1	0	0	NA	0	0	1	NA	0	0	NA	NA	0	0	0	NA	NA	0	0	0	0	0	1	0	NA	0	0	0	NA	NA	5	chr6	166582393	166582394	chr6:166582393-166582394	T,	1	0
cg08558397	NA	0	0	0	0	1	NA	0	0	0	NA	0	0	NA	NA	0	0	0	NA	NA	0	0	0	1	0	0	0	NA	0	0	0	NA	NA	2	chr7	752149	752150	chr7:752149-752150	PRKAR1B,	0	0
cg08507422	NA	0	0	1	0	0	NA	0	0	0	NA	0	0	NA	NA	0	0	0	NA	NA	0	0	0	0	0	0	0	NA	0	0	0	NA	NA	1	chr7	1272512	1272513	chr7:1272512-1272513	UNCX,	1	0
cg16842053	NA	0	1	0	0	0	NA	0	1	0	NA	0	0	NA	NA	0	0	0	NA	NA	0	0	0	0	0	0	0	NA	0	0	0	NA	NA	2	chr7	3083333	3083334	chr7:3083333-3083334	CARD11,	0	0
cg26937500	NA	0	0	0	0	0	NA	0	0	0	NA	0	0	NA	NA	0	0	0	NA	NA	0	0	0	0	0	0	0	NA	0	0	1	NA	NA	1	chr7	3083338	3083339	chr7:3083338-3083339	CARD11,	0	0
cg09461837	NA	0	0	0	0	1	NA	0	0	0	NA	0	0	NA	NA	0	0	0	NA	NA	0	0	0	1	0	0	0	NA	0	0	0	NA	NA	2	chr7	3341524	3341525	chr7:3341524-3341525	SDK1,	1	0
cg26988895	NA	0	0	0	0	1	NA	0	0	0	NA	0	0	NA	NA	0	0	0	NA	NA	0	0	0	0	0	0	0	NA	0	0	0	NA	NA	1	chr7	6576353	6576354	chr7:6576353-6576354	GRID2IP,	1	0
cg01246835	NA	0	0	0	0	1	NA	0	0	0	NA	0	0	NA	NA	0	0	0	NA	NA	0	0	0	0	0	0	0	NA	0	0	0	NA	NA	1	chr7	6703708	6703709	chr7:6703708-6703709	,	0	0
cg01447112	NA	0	0	0	0	0	NA	0	0	0	NA	0	0	NA	NA	1	0	0	NA	NA	1	0	0	0	0	0	0	NA	0	0	0	NA	NA	2	chr7	6703803	6703804	chr7:6703803-6703804	,	0	0
cg00852549	NA	0	0	1	0	0	NA	0	0	0	NA	0	0	NA	NA	0	0	0	NA	NA	0	0	0	0	0	0	0	NA	0	0	0	NA	NA	1	chr7	8473457	8473458	chr7:8473457-8473458	NXPH1,	1	0
cg06411724	NA	0	0	1	0	0	NA	0	0	1	NA	0	0	NA	NA	0	0	0	NA	NA	0	0	0	0	0	0	0	NA	0	0	0	NA	NA	2	chr7	15725477	15725478	chr7:15725477-15725478	MEOX2,	1	0
cg17839237	NA	0	0	0	0	1	NA	0	0	0	NA	0	0	NA	NA	0	0	0	NA	NA	1	0	0	1	0	0	0	NA	0	0	0	NA	NA	3	chr7	19157193	19157194	chr7:19157193-19157194	TWIST1,	1	0
cg24446548	NA	0	0	0	0	0	NA	0	0	0	NA	0	0	NA	NA	0	0	0	NA	NA	0	0	0	0	0	0	1	NA	0	0	0	NA	NA	1	chr7	19157263	19157264	chr7:19157263-19157264	TWIST1,	1	0
cg23181844	NA	0	0	0	0	1	NA	0	0	0	NA	0	0	NA	NA	0	0	0	NA	NA	0	0	0	1	0	0	0	NA	0	0	0	NA	NA	2	chr7	19812548	19812549	chr7:19812548-19812549	TMEM196,	1	0
cg16474297	NA	0	0	0	0	1	NA	0	0	0	NA	0	0	NA	NA	0	0	0	NA	NA	0	0	0	1	0	0	0	NA	0	0	0	NA	NA	2	chr7	21582745	21582746	chr7:21582745-21582746	DNAH11,	1	0
cg09420439	NA	0	0	0	1	0	NA	0	0	0	NA	0	0	NA	NA	0	0	0	NA	NA	0	0	0	0	0	0	0	NA	0	0	0	NA	NA	1	chr7	27136424	27136425	chr7:27136424-27136425	HOTAIRM1,	1	1
cg23432345	NA	0	0	0	1	0	NA	0	0	0	NA	0	0	NA	NA	0	0	0	NA	NA	0	0	0	0	0	0	0	NA	0	0	0	NA	NA	1	chr7	27196153	27196154	chr7:27196153-27196154	HOXA7,	1	0
cg07302069	NA	0	0	0	0	0	NA	0	0	0	NA	0	0	NA	NA	0	0	1	NA	NA	0	0	1	0	0	0	0	NA	0	0	0	NA	NA	2	chr7	27196286	27196287	chr7:27196286-27196287	HOXA7,	1	0
cg16104915	NA	0	0	0	1	0	NA	0	0	0	NA	0	0	NA	NA	0	0	0	NA	NA	0	0	0	0	0	0	0	NA	0	0	0	NA	NA	1	chr7	27205217	27205218	chr7:27205217-27205218	HOXA10-HOXA9,	1	1
cg26365299	NA	0	0	0	0	0	NA	0	0	0	NA	0	0	NA	NA	0	0	0	NA	NA	0	0	0	0	0	1	0	NA	0	0	0	NA	NA	1	chr7	27205381	27205382	chr7:27205381-27205382	HOXA10-HOXA9,	1	1
cg16857858	NA	0	0	0	1	0	NA	0	0	0	NA	0	0	NA	NA	0	1	0	NA	NA	0	0	0	0	0	0	0	NA	0	0	0	NA	NA	2	chr7	27213984	27213985	chr7:27213984-27213985	HOXA10, HOXA10-HOXA9,	1	1
cg11831043	NA	0	0	0	0	1	NA	0	0	0	NA	0	0	NA	NA	0	0	0	NA	NA	0	0	0	1	0	0	0	NA	0	0	0	NA	NA	2	chr7	28449847	28449848	chr7:28449847-28449848	CREB5,	1	0
cg04823311	NA	0	0	0	0	0	NA	0	0	0	NA	0	0	NA	NA	1	0	0	NA	NA	0	0	0	0	0	0	0	NA	0	0	0	NA	NA	1	chr7	28997485	28997486	chr7:28997485-28997486	TRIL,	1	0
cg20101352	NA	0	0	0	0	0	NA	0	0	0	NA	0	0	NA	NA	0	0	0	NA	NA	0	0	1	0	0	0	0	NA	0	0	0	NA	NA	1	chr7	29186234	29186235	chr7:29186234-29186235	CHN2, CPVL,	1	0
cg24610236	NA	0	0	1	0	1	NA	0	0	0	NA	0	0	NA	NA	0	0	0	NA	NA	0	0	0	1	0	0	0	NA	0	0	0	NA	NA	3	chr7	30722114	30722115	chr7:30722114-30722115	CRHR2,	1	0
cg17617930	NA	0	0	0	0	1	NA	0	0	0	NA	0	0	NA	NA	0	0	0	NA	NA	0	0	0	0	0	0	0	NA	0	0	0	NA	NA	1	chr7	31091825	31091826	chr7:31091825-31091826	ADCYAP1R1,	1	0
cg14604568	NA	0	0	1	0	0	NA	0	0	0	NA	0	0	NA	NA	0	0	0	NA	NA	0	0	0	0	0	0	0	NA	0	0	0	NA	NA	1	chr7	32110523	32110524	chr7:32110523-32110524	PDE1C,	1	0
cg15988350	NA	0	0	0	0	1	NA	0	0	0	NA	0	0	NA	NA	0	0	0	NA	NA	0	0	0	1	0	0	0	NA	0	0	0	NA	NA	2	chr7	32110650	32110651	chr7:32110650-32110651	PDE1C,	1	0
cg07628404	NA	0	0	0	0	0	NA	0	0	0	NA	0	0	NA	NA	0	0	0	NA	NA	0	0	0	1	0	0	0	NA	0	0	0	NA	NA	1	chr7	35226524	35226525	chr7:35226524-35226525	DPY19L2P1,	1	1
cg12975779	NA	0	0	0	0	1	NA	0	0	0	NA	0	0	NA	NA	0	0	0	NA	NA	0	0	0	0	0	0	0	NA	0	0	0	NA	NA	1	chr7	35226610	35226611	chr7:35226610-35226611	DPY19L2P1,	1	1
cg00159100	NA	0	0	1	0	1	NA	0	0	1	NA	0	0	NA	NA	0	0	0	NA	NA	0	0	0	1	0	0	1	NA	0	0	0	NA	NA	5	chr7	37487633	37487634	chr7:37487633-37487634	ELMO1,	0	0
cg19875547	NA	0	0	0	0	1	NA	0	0	0	NA	0	0	NA	NA	0	0	0	NA	NA	1	0	0	0	0	0	0	NA	0	0	0	NA	NA	2	chr7	38670804	38670805	chr7:38670804-38670805	AMPH,	1	0
cg10293925	NA	0	0	0	0	0	NA	0	0	0	NA	0	0	NA	NA	0	0	0	NA	NA	0	0	0	1	0	0	0	NA	0	0	0	NA	NA	1	chr7	38670985	38670986	chr7:38670985-38670986	AMPH,	1	0
cg17045801	NA	0	0	0	0	1	NA	0	0	0	NA	0	0	NA	NA	0	0	0	NA	NA	0	0	0	1	0	0	0	NA	0	0	0	NA	NA	2	chr7	43153223	43153224	chr7:43153223-43153224	HECW1,	1	0
cg14249876	NA	0	0	0	0	1	NA	0	0	0	NA	0	0	NA	NA	0	0	0	NA	NA	0	0	0	1	0	0	0	NA	0	0	0	NA	NA	2	chr7	44143993	44143994	chr7:44143993-44143994	AEBP1,	1	0
cg01893212	NA	0	0	0	0	1	NA	0	0	0	NA	0	0	NA	NA	0	0	0	NA	NA	1	0	1	1	0	0	0	NA	0	0	0	NA	NA	4	chr7	49813088	49813089	chr7:49813088-49813089	VWC2,	1	1
cg17093995	NA	0	0	1	0	0	NA	0	0	0	NA	0	0	NA	NA	0	0	0	NA	NA	0	0	0	0	0	0	0	NA	0	0	1	NA	NA	2	chr7	49815502	49815503	chr7:49815502-49815503	VWC2,	1	1
cg07589773	NA	0	0	0	0	1	NA	0	0	0	NA	0	0	NA	NA	0	0	0	NA	NA	0	0	0	0	0	0	0	NA	0	0	0	NA	NA	1	chr7	50343883	50343884	chr7:50343883-50343884	IKZF1,	1	0
cg27633530	NA	0	0	0	0	0	NA	0	0	0	NA	0	0	NA	NA	0	0	0	NA	NA	0	0	1	0	0	0	0	NA	0	0	0	NA	NA	1	chr7	50344294	50344295	chr7:50344294-50344295	IKZF1,	1	0
cg20078466	NA	0	0	0	0	0	NA	0	0	0	NA	0	0	NA	NA	0	0	0	NA	NA	0	0	0	1	0	0	0	NA	0	0	0	NA	NA	1	chr7	50344331	50344332	chr7:50344331-50344332	IKZF1,	1	0
cg02910208	NA	0	0	1	0	1	NA	0	0	1	NA	0	0	NA	NA	0	0	0	NA	NA	0	0	0	0	0	0	0	NA	0	0	0	NA	NA	3	chr7	54610022	54610023	chr7:54610022-54610023	VSTM2A,	1	0
cg18325439	NA	0	0	1	0	0	NA	0	0	0	NA	0	0	NA	NA	0	0	0	NA	NA	0	0	0	0	0	0	0	NA	0	0	0	NA	NA	1	chr7	71217320	71217321	chr7:71217320-71217321	,	0	0
cg03009871	NA	0	0	0	0	1	NA	0	0	0	NA	0	0	NA	NA	0	0	0	NA	NA	0	0	0	0	0	0	0	NA	0	0	0	NA	NA	1	chr7	79082038	79082039	chr7:79082038-79082039	MAGI2,	1	0
cg10852177	NA	0	0	0	0	1	NA	0	0	0	NA	0	0	NA	NA	0	0	0	NA	NA	0	0	0	1	0	0	0	NA	0	0	0	NA	NA	2	chr7	84816454	84816455	chr7:84816454-84816455	,	1	0
cg23183497	NA	0	0	1	0	1	NA	0	0	0	NA	0	0	NA	NA	0	0	0	NA	NA	0	0	0	0	0	0	0	NA	0	0	0	NA	NA	2	chr7	86273718	86273719	chr7:86273718-86273719	GRM3,	1	0
cg27507700	NA	0	0	0	0	0	NA	0	0	0	NA	0	0	NA	NA	0	0	0	NA	NA	0	0	0	0	0	0	1	NA	0	0	0	NA	NA	1	chr7	87230189	87230190	chr7:87230189-87230190	ABCB1,	1	0
cg00862116	NA	0	0	1	0	0	NA	0	0	0	NA	0	0	NA	NA	0	0	0	NA	NA	0	0	1	0	0	0	0	NA	0	0	0	NA	NA	2	chr7	87230344	87230345	chr7:87230344-87230345	ABCB1,	1	0
cg04710402	NA	0	0	1	0	0	NA	0	0	0	NA	0	0	NA	NA	0	0	0	NA	NA	0	0	0	0	0	0	0	NA	0	0	0	NA	NA	1	chr7	87257074	87257075	chr7:87257074-87257075	ABCB1,	1	0
cg19430577	NA	0	0	0	0	0	NA	0	1	0	NA	0	0	NA	NA	0	0	0	NA	NA	0	0	0	0	0	0	0	NA	0	0	0	NA	NA	1	chr7	87936225	87936226	chr7:87936225-87936226	STEAP4,	0	0
cg23474211	NA	0	0	1	0	1	NA	0	0	0	NA	0	0	NA	NA	0	0	0	NA	NA	0	0	0	1	0	0	0	NA	0	0	0	NA	NA	3	chr7	88388646	88388647	chr7:88388646-88388647	ZNF804B,	1	0
cg23998645	NA	0	0	0	0	1	NA	0	0	0	NA	0	0	NA	NA	0	0	0	NA	NA	0	0	0	1	0	0	0	NA	0	0	0	NA	NA	2	chr7	89748294	89748295	chr7:89748294-89748295	STEAP2-AS1,	0	1
cg25363607	NA	0	0	0	0	1	NA	0	0	0	NA	0	0	NA	NA	0	0	0	NA	NA	0	0	0	0	0	0	0	NA	0	0	0	NA	NA	1	chr7	90226284	90226285	chr7:90226284-90226285	CDK14,	0	0
cg24599249	NA	0	0	0	0	1	NA	0	0	0	NA	0	0	NA	NA	0	0	0	NA	NA	0	0	0	0	0	0	0	NA	0	0	0	NA	NA	1	chr7	90895027	90895028	chr7:90895027-90895028	FZD1,	1	0
cg16589214	NA	0	0	1	0	0	NA	0	0	0	NA	0	0	NA	NA	0	0	0	NA	NA	0	0	0	0	0	0	0	NA	0	0	0	NA	NA	1	chr7	93204046	93204047	chr7:93204046-93204047	CALCR,	1	0
cg17338208	NA	0	0	0	0	0	NA	0	0	0	NA	0	0	NA	NA	0	0	0	NA	NA	0	0	0	1	0	0	0	NA	0	0	0	NA	NA	1	chr7	93520024	93520025	chr7:93520024-93520025	TFPI2,	1	0
cg19212224	NA	0	0	1	0	0	NA	0	0	0	NA	0	0	NA	NA	0	0	0	NA	NA	0	0	0	0	0	0	0	NA	0	0	0	NA	NA	1	chr7	97362705	97362706	chr7:97362705-97362706	TAC1,	1	0
cg19752627	NA	0	0	0	0	1	NA	0	0	0	NA	0	0	NA	NA	0	0	0	NA	NA	0	0	0	1	0	0	0	NA	0	0	0	NA	NA	2	chr7	98467380	98467381	chr7:98467380-98467381	TMEM130,	1	0
cg01307939	NA	0	0	0	0	0	NA	0	0	0	NA	0	0	NA	NA	0	0	0	NA	NA	0	0	0	0	0	0	1	NA	0	0	0	NA	NA	1	chr7	98467571	98467572	chr7:98467571-98467572	TMEM130,	1	0
cg22758700	NA	0	0	0	0	0	NA	0	0	0	NA	0	0	NA	NA	0	0	0	NA	NA	0	0	1	0	0	0	0	NA	0	0	0	NA	NA	1	chr7	99156126	99156127	chr7:99156126-99156127	ZNF655,	0	0
cg13207797	NA	0	0	0	0	1	NA	0	0	0	NA	0	0	NA	NA	0	0	0	NA	NA	0	0	0	0	0	0	0	NA	0	0	0	NA	NA	1	chr7	100318321	100318322	chr7:100318321-100318322	EPO,	1	0
cg14562712	NA	0	0	1	0	0	NA	0	0	0	NA	0	0	NA	NA	0	0	0	NA	NA	0	0	0	0	0	0	0	NA	0	0	0	NA	NA	1	chr7	100823377	100823378	chr7:100823377-100823378	NAT16,	1	0
cg18011364	NA	0	0	0	0	0	NA	0	0	0	NA	0	0	NA	NA	0	0	0	NA	NA	0	0	0	1	0	0	0	NA	0	0	0	NA	NA	1	chr7	103630086	103630087	chr7:103630086-103630087	RELN,	1	0
cg03203223	NA	0	0	0	0	1	NA	0	0	0	NA	0	0	NA	NA	0	0	0	NA	NA	0	0	0	0	0	0	0	NA	0	0	0	NA	NA	1	chr7	103630549	103630550	chr7:103630549-103630550	RELN,	1	0
cg10036918	NA	0	0	1	0	0	NA	0	0	0	NA	0	0	NA	NA	0	0	0	NA	NA	0	0	0	0	0	0	0	NA	0	0	0	NA	NA	1	chr7	103969166	103969167	chr7:103969166-103969167	LHFPL3,	1	0
cg11617147	NA	0	0	0	0	0	NA	0	0	0	NA	0	0	NA	NA	0	0	0	NA	NA	0	0	1	0	0	0	0	NA	0	0	0	NA	NA	1	chr7	105517689	105517690	chr7:105517689-105517690	ATXN7L1,	1	0
cg13251269	NA	0	0	0	0	1	NA	0	0	0	NA	0	0	NA	NA	0	0	0	NA	NA	0	0	0	1	0	0	0	NA	0	0	0	NA	NA	2	chr7	112726538	112726539	chr7:112726538-112726539	GPR85,	1	0
cg05994320	NA	0	0	0	0	0	NA	0	0	0	NA	0	0	NA	NA	0	0	0	NA	NA	0	0	0	0	0	0	0	NA	0	0	1	NA	NA	1	chr7	113727753	113727754	chr7:113727753-113727754	FOXP2,	1	1
cg25274503	NA	0	0	0	0	0	NA	0	0	0	NA	0	0	NA	NA	0	0	0	NA	NA	0	0	1	0	0	0	0	NA	0	0	0	NA	NA	1	chr7	116140128	116140129	chr7:116140128-116140129	CAV2,	1	0
cg24934063	NA	0	0	1	0	0	NA	0	0	1	NA	0	0	NA	NA	0	0	0	NA	NA	0	0	0	0	0	0	0	NA	0	0	0	NA	NA	2	chr7	121944173	121944174	chr7:121944173-121944174	FEZF1, FEZF1-AS1,	1	1
cg20329153	NA	0	0	1	0	0	NA	0	0	1	NA	0	0	NA	NA	0	0	1	NA	NA	0	0	0	0	0	0	0	NA	0	0	0	NA	NA	3	chr7	121950282	121950283	chr7:121950282-121950283	FEZF1-AS1,	1	1
cg26824006	NA	1	0	1	0	0	NA	0	0	0	NA	0	0	NA	NA	0	0	1	NA	NA	0	0	0	0	0	0	0	NA	0	0	0	NA	NA	3	chr7	121957254	121957255	chr7:121957254-121957255	CADPS2,	1	0
cg26118408	NA	0	0	0	0	0	NA	0	1	0	NA	0	0	NA	NA	0	0	0	NA	NA	0	0	0	0	0	0	0	NA	0	0	0	NA	NA	1	chr7	126987840	126987841	chr7:126987840-126987841	,	1	0
cg21901946	NA	0	0	0	0	1	NA	0	0	0	NA	0	0	NA	NA	0	0	0	NA	NA	0	0	0	0	0	0	0	NA	0	0	0	NA	NA	1	chr7	127744210	127744211	chr7:127744210-127744211	,	1	0
cg14455998	NA	0	0	0	0	1	NA	0	0	0	NA	0	0	NA	NA	0	0	0	NA	NA	0	0	0	0	0	0	0	NA	0	0	0	NA	NA	1	chr7	133811808	133811809	chr7:133811808-133811809	LRGUK,	0	0
cg06864853	NA	0	0	0	0	1	NA	0	0	0	NA	0	0	NA	NA	0	0	0	NA	NA	0	0	0	0	0	0	0	NA	0	0	0	NA	NA	1	chr7	134143971	134143972	chr7:134143971-134143972	AKR1B1,	0	0
cg02215070	NA	0	0	0	0	0	NA	0	0	0	NA	0	0	NA	NA	0	0	0	NA	NA	0	0	1	1	0	0	0	NA	0	0	0	NA	NA	2	chr7	134144055	134144056	chr7:134144055-134144056	AKR1B1,	0	1
cg10747023	NA	0	0	0	0	0	NA	0	0	0	NA	0	0	NA	NA	0	0	0	NA	NA	0	0	0	0	0	1	0	NA	0	0	0	NA	NA	1	chr7	140774559	140774560	chr7:140774559-140774560	TMEM178B,	1	0
cg06331595	NA	0	0	0	0	0	NA	0	0	0	NA	0	0	NA	NA	0	0	0	NA	NA	0	0	1	0	0	0	0	NA	0	0	0	NA	NA	1	chr7	141211956	141211957	chr7:141211956-141211957	,	1	0
cg12652174	NA	0	0	1	0	0	NA	0	0	0	NA	0	0	NA	NA	0	0	0	NA	NA	0	0	0	0	0	0	0	NA	0	0	0	NA	NA	1	chr7	142494773	142494774	chr7:142494773-142494774	,	0	0
cg21621906	NA	0	0	0	0	0	NA	0	0	0	NA	0	0	NA	NA	0	0	0	NA	NA	0	0	0	1	0	0	1	NA	0	0	0	NA	NA	2	chr7	142494914	142494915	chr7:142494914-142494915	,	0	0
cg08430489	NA	0	0	0	0	1	NA	0	0	0	NA	0	0	NA	NA	0	0	0	NA	NA	0	0	0	0	0	0	0	NA	0	0	0	NA	NA	1	chr7	142494953	142494954	chr7:142494953-142494954	,	0	0
cg03514404	NA	0	0	0	0	0	NA	0	0	0	NA	0	0	NA	NA	0	0	0	NA	NA	0	0	1	0	0	0	0	NA	0	0	0	NA	NA	1	chr7	143579665	143579666	chr7:143579665-143579666	TCAF1,	0	0
cg03225210	NA	0	0	0	0	0	NA	0	0	0	NA	0	0	NA	NA	0	0	0	NA	NA	0	0	0	0	0	0	0	NA	0	0	1	NA	NA	1	chr7	143579951	143579952	chr7:143579951-143579952	TCAF1,	0	0
cg09571420	NA	0	0	1	0	0	NA	0	0	0	NA	0	0	NA	NA	0	0	0	NA	NA	0	0	0	0	0	0	0	NA	0	0	0	NA	NA	1	chr7	145813008	145813009	chr7:145813008-145813009	CNTNAP2,	0	0
cg26269703	NA	0	0	0	0	0	NA	0	1	0	NA	0	0	NA	NA	0	0	0	NA	NA	0	0	0	0	0	0	0	NA	0	0	0	NA	NA	1	chr7	149119681	149119682	chr7:149119681-149119682	,	1	0
cg16482474	NA	0	0	0	0	1	NA	0	0	0	NA	0	0	NA	NA	0	0	0	NA	NA	0	0	1	1	0	0	0	NA	0	0	0	NA	NA	3	chr7	151107637	151107638	chr7:151107637-151107638	WDR86, WDR86-AS1,	1	1
cg00469207	NA	0	0	1	0	1	NA	0	0	0	NA	0	0	NA	NA	0	0	0	NA	NA	0	0	0	0	0	0	0	NA	0	0	0	NA	NA	2	chr7	152622455	152622456	chr7:152622455-152622456	,	1	0
cg21929943	NA	0	0	0	0	0	NA	0	0	0	NA	0	0	NA	NA	0	0	0	NA	NA	0	0	0	1	0	0	0	NA	0	0	0	NA	NA	1	chr7	152622815	152622816	chr7:152622815-152622816	,	1	0
cg15835825	NA	0	0	1	0	0	NA	0	0	0	NA	0	0	NA	NA	0	0	0	NA	NA	0	0	0	0	0	0	0	NA	0	0	0	NA	NA	1	chr7	154862030	154862031	chr7:154862030-154862031	HTR5A-AS1,	1	1
cg20567847	NA	0	0	0	0	1	NA	0	0	0	NA	0	0	NA	NA	0	0	0	NA	NA	0	0	0	0	0	0	0	NA	0	0	0	NA	NA	1	chr7	155167038	155167039	chr7:155167038-155167039	,	1	0
cg09970120	NA	0	0	1	0	0	NA	0	0	0	NA	0	0	NA	NA	0	0	0	NA	NA	0	0	0	0	0	0	0	NA	0	0	0	NA	NA	1	chr7	155167844	155167845	chr7:155167844-155167845	,	1	0
cg20183619	NA	0	0	1	0	0	NA	0	0	0	NA	0	0	NA	NA	0	0	0	NA	NA	0	0	0	0	0	0	0	NA	0	0	0	NA	NA	1	chr7	155241490	155241491	chr7:155241490-155241491	,	1	0
cg04828133	NA	1	0	1	0	0	NA	0	0	1	NA	0	0	NA	NA	0	0	0	NA	NA	0	0	0	0	0	0	0	NA	0	0	0	NA	NA	3	chr7	155259845	155259846	chr7:155259845-155259846	EN2,	1	0
cg04134305	NA	0	0	0	0	0	NA	0	1	0	NA	0	0	NA	NA	0	0	0	NA	NA	0	0	0	0	0	0	0	NA	0	0	0	NA	NA	1	chr7	156433520	156433521	chr7:156433520-156433521	RNF32,	1	0
cg19258665	NA	0	0	1	0	1	NA	0	0	0	NA	0	0	NA	NA	0	0	0	NA	NA	0	0	0	1	0	0	0	NA	0	0	0	NA	NA	3	chr7	157482508	157482509	chr7:157482508-157482509	PTPRN2,	1	0
cg03976877	NA	0	0	1	0	1	NA	0	0	0	NA	0	0	NA	NA	0	0	0	NA	NA	0	0	0	1	0	0	0	NA	0	0	0	NA	NA	3	chr7	158937610	158937611	chr7:158937610-158937611	VIPR2,	1	1
cg03294066	NA	0	0	0	0	1	NA	0	0	0	NA	0	0	NA	NA	0	0	0	NA	NA	0	0	0	0	0	0	0	NA	0	0	0	NA	NA	1	chr8	494721	494722	chr8:494721-494722	TDRP,	0	0
cg27392850	NA	0	0	0	0	1	NA	0	0	0	NA	0	0	NA	NA	0	0	0	NA	NA	0	0	0	0	0	0	0	NA	0	0	0	NA	NA	1	chr8	9764073	9764074	chr8:9764073-9764074	LINC00599, MIR124-1,	1	1
cg05362548	NA	0	0	0	0	1	NA	0	0	0	NA	0	0	NA	NA	0	0	0	NA	NA	0	0	0	1	0	0	0	NA	0	0	0	NA	NA	2	chr8	11205166	11205167	chr8:11205166-11205167	TDH,	1	1
cg14666113	NA	0	0	1	0	0	NA	0	0	0	NA	0	0	NA	NA	0	0	0	NA	NA	0	0	0	0	0	0	0	NA	0	0	0	NA	NA	1	chr8	11561724	11561725	chr8:11561724-11561725	GATA4,	1	0
cg23218760	NA	0	0	1	0	1	NA	0	0	0	NA	0	0	NA	NA	0	0	0	NA	NA	0	0	0	1	0	0	0	NA	0	0	0	NA	NA	3	chr8	16884364	16884365	chr8:16884364-16884365	MICU3,	0	1
cg20521389	NA	0	0	1	0	1	NA	0	0	0	NA	0	0	NA	NA	0	0	0	NA	NA	0	0	0	0	0	0	0	NA	0	0	0	NA	NA	2	chr8	21645509	21645510	chr8:21645509-21645510	GFRA2,	1	0
cg07005294	NA	0	0	0	0	1	NA	0	0	0	NA	0	0	NA	NA	0	0	0	NA	NA	0	0	0	0	0	0	0	NA	0	0	0	NA	NA	1	chr8	23572029	23572030	chr8:23572029-23572030	,	1	0
cg15820062	NA	0	0	0	0	0	NA	0	1	0	NA	0	0	NA	NA	0	0	0	NA	NA	0	0	0	0	0	0	0	NA	0	0	0	NA	NA	1	chr8	23584404	23584405	chr8:23584404-23584405	,	1	0
cg13734972	NA	0	0	0	0	0	NA	0	1	0	NA	0	0	NA	NA	0	0	0	NA	NA	0	0	0	0	0	0	0	NA	0	0	0	NA	NA	1	chr8	25042630	25042631	chr8:25042630-25042631	DOCK5,	0	0
cg08283882	NA	0	0	1	0	0	NA	0	0	0	NA	0	0	NA	NA	0	0	0	NA	NA	0	0	0	0	0	0	0	NA	0	0	0	NA	NA	1	chr8	25901017	25901018	chr8:25901017-25901018	EBF2,	1	0
cg00333512	NA	0	0	1	0	0	NA	0	0	0	NA	0	0	NA	NA	0	0	0	NA	NA	0	0	0	0	0	0	0	NA	0	0	0	NA	NA	1	chr8	25909599	25909600	chr8:25909599-25909600	,	1	0
cg22757399	NA	0	0	1	0	1	NA	0	0	0	NA	0	0	NA	NA	0	0	0	NA	NA	0	0	0	0	0	0	0	NA	0	0	0	NA	NA	2	chr8	26370552	26370553	chr8:26370552-26370553	PNMA2,	1	0
cg22295787	NA	0	0	1	0	0	NA	0	0	0	NA	0	0	NA	NA	0	0	0	NA	NA	0	0	0	0	0	0	0	NA	0	0	0	NA	NA	1	chr8	26723584	26723585	chr8:26723584-26723585	ADRA1A,	1	0
cg04555373	NA	0	0	0	0	1	NA	0	0	0	NA	0	0	NA	NA	0	0	0	NA	NA	0	0	0	1	0	0	0	NA	0	0	0	NA	NA	2	chr8	31497042	31497043	chr8:31497042-31497043	NRG1,	1	0
cg25230074	NA	0	0	0	0	0	NA	0	0	0	NA	0	0	NA	NA	0	0	0	NA	NA	0	0	0	1	0	0	0	NA	0	0	0	NA	NA	1	chr8	32405792	32405793	chr8:32405792-32405793	NRG1,	1	0
cg06926782	NA	0	0	0	0	1	NA	0	0	0	NA	0	0	NA	NA	0	0	0	NA	NA	0	0	0	0	0	0	0	NA	0	0	0	NA	NA	1	chr8	32406928	32406929	chr8:32406928-32406929	NRG1,	1	0
cg08000065	NA	0	0	1	0	1	NA	0	0	0	NA	0	0	NA	NA	0	0	0	NA	NA	0	0	0	1	0	0	0	NA	0	0	1	NA	NA	4	chr8	35092823	35092824	chr8:35092823-35092824	UNC5D,	0	0
cg22513169	NA	0	0	0	0	0	NA	0	1	0	NA	0	0	NA	NA	0	0	0	NA	NA	0	0	0	0	0	0	0	NA	0	0	0	NA	NA	1	chr8	37756965	37756966	chr8:37756965-37756966	RAB11FIP1,	0	0
cg09258813	NA	0	0	1	0	1	NA	0	0	0	NA	0	0	NA	NA	0	0	0	NA	NA	0	0	0	0	0	0	0	NA	0	0	0	NA	NA	2	chr8	37823409	37823410	chr8:37823409-37823410	ADRB3,	1	0
cg17619823	NA	0	0	0	0	0	NA	0	0	0	NA	0	0	NA	NA	0	0	0	NA	NA	0	0	0	1	0	0	0	NA	0	0	0	NA	NA	1	chr8	37823475	37823476	chr8:37823475-37823476	ADRB3,	1	0
cg17331296	NA	0	0	0	0	0	NA	0	0	0	NA	0	0	NA	NA	0	1	0	NA	NA	0	0	0	0	0	0	0	NA	0	0	0	NA	NA	1	chr8	41754181	41754182	chr8:41754181-41754182	ANK1,	1	0
cg18991611	NA	0	0	0	0	0	NA	0	0	0	NA	0	0	NA	NA	0	0	0	NA	NA	0	0	1	0	0	0	0	NA	0	0	0	NA	NA	1	chr8	49468828	49468829	chr8:49468828-49468829	LOC101929268,	1	1
cg17162024	NA	0	1	1	0	0	NA	0	0	1	NA	0	0	NA	NA	0	0	0	NA	NA	0	0	0	0	0	0	0	NA	0	0	0	NA	NA	3	chr8	53478454	53478455	chr8:53478454-53478455	ALKAL1,	1	0
cg24928391	NA	0	0	0	0	0	NA	0	0	1	NA	0	0	NA	NA	0	0	0	NA	NA	0	0	0	0	0	0	0	NA	0	0	0	NA	NA	1	chr8	55370336	55370337	chr8:55370336-55370337	SOX17,	1	0
cg04672706	NA	0	0	1	0	0	NA	0	0	0	NA	0	0	NA	NA	0	0	0	NA	NA	0	0	0	0	0	0	0	NA	0	0	0	NA	NA	1	chr8	55370423	55370424	chr8:55370423-55370424	SOX17,	1	0
cg00688447	NA	0	0	0	0	0	NA	0	0	1	NA	0	0	NA	NA	0	0	0	NA	NA	0	0	0	0	0	0	0	NA	0	0	0	NA	NA	1	chr8	55379910	55379911	chr8:55379910-55379911	,	1	0
cg16504626	NA	0	0	1	0	0	NA	0	0	0	NA	0	0	NA	NA	0	0	0	NA	NA	0	0	0	0	0	0	0	NA	0	0	0	NA	NA	1	chr8	57070013	57070014	chr8:57070013-57070014	PLAG1,	0	0
cg20702559	NA	0	0	1	0	1	NA	0	0	0	NA	0	0	NA	NA	0	0	0	NA	NA	0	0	0	1	0	0	0	NA	0	0	0	NA	NA	3	chr8	58907821	58907822	chr8:58907821-58907822	FAM110B,	0	0
cg24158594	NA	0	0	0	0	0	NA	0	0	0	NA	0	0	NA	NA	0	0	0	NA	NA	0	0	0	0	0	1	0	NA	0	0	0	NA	NA	1	chr8	60030763	60030764	chr8:60030763-60030764	TOX,	0	0
cg00994693	NA	0	0	0	0	0	NA	0	0	1	NA	0	0	NA	NA	0	0	0	NA	NA	0	0	0	0	0	0	0	NA	0	0	0	NA	NA	1	chr8	61193715	61193716	chr8:61193715-61193716	CA8,	1	1
cg07283114	NA	0	0	0	0	1	NA	0	0	0	NA	0	0	NA	NA	0	0	0	NA	NA	0	0	0	0	0	0	0	NA	0	0	0	NA	NA	1	chr8	65489065	65489066	chr8:65489065-65489066	LOC401463,	1	1
cg17307479	NA	0	0	0	0	1	NA	0	0	0	NA	0	0	NA	NA	0	0	0	NA	NA	0	0	0	0	0	0	0	NA	0	0	0	NA	NA	1	chr8	65494101	65494102	chr8:65494101-65494102	BHLHE22,	1	0
cg15160198	NA	0	0	0	0	1	NA	0	0	0	NA	0	0	NA	NA	0	0	0	NA	NA	0	0	0	0	0	0	0	NA	0	0	1	NA	NA	2	chr8	65711369	65711370	chr8:65711369-65711370	CYP7B1,	1	0
cg20295442	NA	0	0	0	0	1	NA	0	0	0	NA	0	0	NA	NA	0	0	0	NA	NA	0	0	0	1	0	0	0	NA	0	0	0	NA	NA	2	chr8	67344665	67344666	chr8:67344665-67344666	ADHFE1, RRS1, RRS1-AS1,	0	1
cg14353137	NA	0	0	0	1	0	NA	0	1	0	NA	0	0	NA	NA	1	1	0	NA	NA	0	0	0	1	0	0	0	NA	0	0	0	NA	NA	5	chr8	67873799	67873800	chr8:67873799-67873800	TCF24,	1	0
cg07922007	NA	0	0	0	0	0	NA	0	0	0	NA	0	0	NA	NA	0	0	0	NA	NA	0	0	0	0	0	0	1	NA	0	0	0	NA	NA	1	chr8	67874858	67874859	chr8:67874858-67874859	TCF24,	1	0
cg01824969	NA	0	0	0	0	1	NA	0	0	0	NA	0	0	NA	NA	0	0	0	NA	NA	0	0	0	0	0	0	0	NA	0	0	0	NA	NA	1	chr8	67875261	67875262	chr8:67875261-67875262	TCF24,	1	0
cg14657834	NA	0	0	0	0	0	NA	0	0	0	NA	0	0	NA	NA	0	0	0	NA	NA	0	0	1	0	0	0	0	NA	0	0	0	NA	NA	1	chr8	67875441	67875442	chr8:67875441-67875442	TCF24,	1	0
cg23300368	NA	0	0	0	0	1	NA	0	0	0	NA	0	0	NA	NA	0	0	0	NA	NA	0	0	0	0	0	0	0	NA	0	0	0	NA	NA	1	chr8	68864908	68864909	chr8:68864908-68864909	PREX2,	0	0
cg22001496	NA	0	0	0	0	1	NA	0	0	0	NA	0	0	NA	NA	0	0	0	NA	NA	0	0	0	1	0	0	0	NA	0	0	0	NA	NA	2	chr8	69243486	69243487	chr8:69243486-69243487	C8orf34, C8orf34-AS1,	1	1
cg21479226	NA	0	0	1	0	0	NA	0	0	0	NA	0	0	NA	NA	0	0	0	NA	NA	0	0	0	0	0	0	0	NA	0	0	0	NA	NA	1	chr8	69244510	69244511	chr8:69244510-69244511	C8orf34,	1	1
cg02919936	NA	0	0	1	1	1	NA	1	0	0	NA	0	0	NA	NA	0	0	0	NA	NA	0	0	0	1	0	0	0	NA	0	0	1	NA	NA	6	chr8	70982285	70982286	chr8:70982285-70982286	PRDM14,	0	0
cg09734791	NA	0	0	1	0	1	NA	0	0	0	NA	0	0	NA	NA	0	0	0	NA	NA	0	0	0	0	0	0	1	NA	0	0	0	NA	NA	3	chr8	72756155	72756156	chr8:72756155-72756156	MSC, MSC-AS1,	1	1
cg20675505	NA	0	0	0	0	0	NA	0	0	0	NA	0	0	NA	NA	0	0	0	NA	NA	0	0	0	1	0	0	0	NA	0	0	0	NA	NA	1	chr8	72756812	72756813	chr8:72756812-72756813	MSC-AS1,	1	1
cg14703605	NA	0	0	1	0	0	NA	0	0	0	NA	0	0	NA	NA	0	0	0	NA	NA	0	0	0	0	0	0	0	NA	0	0	0	NA	NA	1	chr8	72987916	72987917	chr8:72987916-72987917	TRPA1,	1	0
cg01937650	NA	0	0	0	0	1	NA	0	0	0	NA	0	0	NA	NA	0	0	0	NA	NA	0	0	0	0	0	0	0	NA	0	0	0	NA	NA	1	chr8	75896836	75896837	chr8:75896836-75896837	CRISPLD1,	0	0
cg13534450	NA	0	0	1	0	0	NA	0	0	0	NA	0	0	NA	NA	0	0	0	NA	NA	0	0	0	0	0	0	0	NA	0	0	0	NA	NA	1	chr8	75897297	75897298	chr8:75897297-75897298	CRISPLD1,	0	0
cg23134869	NA	0	0	1	0	0	NA	0	0	0	NA	0	0	NA	NA	0	0	0	NA	NA	0	0	0	0	0	0	0	NA	0	0	0	NA	NA	1	chr8	77593233	77593234	chr8:77593233-77593234	ZFHX4-AS1,	1	1
cg01419567	NA	0	0	0	0	1	NA	0	0	0	NA	0	0	NA	NA	0	0	0	NA	NA	0	0	0	1	0	0	0	NA	0	0	0	NA	NA	2	chr8	77594595	77594596	chr8:77594595-77594596	ZFHX4, ZFHX4-AS1,	1	1
cg01774159	NA	0	0	1	0	0	NA	0	0	0	NA	0	0	NA	NA	0	0	0	NA	NA	0	0	0	0	0	0	0	NA	0	0	0	NA	NA	1	chr8	80524467	80524468	chr8:80524467-80524468	STMN2,	1	0
cg00399374	NA	0	0	0	0	0	NA	0	0	0	NA	0	0	NA	NA	0	0	0	NA	NA	0	0	0	0	0	1	0	NA	0	0	0	NA	NA	1	chr8	82644943	82644944	chr8:82644943-82644944	CHMP4C,	0	0
cg05716166	NA	0	0	1	0	1	NA	0	0	0	NA	0	0	NA	NA	0	0	0	NA	NA	0	0	0	1	0	0	0	NA	0	0	0	NA	NA	3	chr8	85095498	85095499	chr8:85095498-85095499	RALYL,	1	0
cg12926938	NA	0	0	1	0	1	NA	0	0	0	NA	0	0	NA	NA	0	0	0	NA	NA	0	0	1	1	0	0	0	NA	0	0	0	NA	NA	4	chr8	93114150	93114151	chr8:93114150-93114151	RUNX1T1,	0	0
cg17999376	NA	0	0	0	0	1	NA	0	0	0	NA	0	0	NA	NA	0	0	0	NA	NA	0	0	0	0	0	0	0	NA	0	0	0	NA	NA	1	chr8	97169920	97169921	chr8:97169920-97169921	GDF6,	1	0
cg00421139	NA	0	0	0	0	0	NA	0	0	0	NA	0	0	NA	NA	0	0	0	NA	NA	0	0	0	1	0	0	0	NA	0	0	0	NA	NA	1	chr8	97172961	97172962	chr8:97172961-97172962	GDF6,	1	0
cg03734437	NA	0	0	0	0	1	NA	0	0	0	NA	0	0	NA	NA	0	0	0	NA	NA	0	0	0	0	0	0	0	NA	0	0	0	NA	NA	1	chr8	97173526	97173527	chr8:97173526-97173527	GDF6,	1	0
cg13096260	NA	0	0	0	0	1	NA	0	0	0	NA	0	0	NA	NA	0	0	0	NA	NA	0	0	0	1	0	0	0	NA	0	0	0	NA	NA	2	chr8	97505764	97505765	chr8:97505764-97505765	SDC2,	0	0
cg18004756	NA	0	0	0	0	0	NA	0	0	0	NA	0	0	NA	NA	1	0	0	NA	NA	0	0	0	0	0	0	0	NA	0	0	0	NA	NA	1	chr8	102504482	102504483	chr8:102504482-102504483	GRHL2,	0	0
cg08550785	NA	0	0	0	0	1	NA	0	0	0	NA	0	0	NA	NA	0	0	0	NA	NA	0	0	0	1	0	0	0	NA	0	0	0	NA	NA	2	chr8	104513909	104513910	chr8:104513909-104513910	LOC105375690, RIMS2,	0	1
cg09306606	NA	0	0	1	0	1	NA	0	0	0	NA	0	0	NA	NA	0	0	0	NA	NA	0	0	0	0	0	0	0	NA	0	0	0	NA	NA	2	chr8	107284054	107284055	chr8:107284054-107284055	OXR1,	1	0
cg00910695	NA	0	0	1	0	1	NA	0	0	0	NA	0	0	NA	NA	0	0	0	NA	NA	0	0	0	1	0	0	0	NA	0	0	0	NA	NA	3	chr8	109095568	109095569	chr8:109095568-109095569	RSPO2,	1	0
cg04237663	NA	0	0	1	0	0	NA	0	0	0	NA	0	0	NA	NA	0	0	0	NA	NA	0	0	0	0	0	0	0	NA	0	0	0	NA	NA	1	chr8	110987019	110987020	chr8:110987019-110987020	KCNV1,	1	0
cg25052970	NA	0	0	1	0	0	NA	0	0	0	NA	0	0	NA	NA	0	0	0	NA	NA	0	0	0	0	0	0	0	NA	0	0	0	NA	NA	1	chr8	114447346	114447347	chr8:114447346-114447347	CSMD3,	1	0
cg21602557	NA	0	0	0	0	0	NA	0	0	0	NA	0	0	NA	NA	0	0	0	NA	NA	0	0	1	0	0	0	0	NA	0	0	0	NA	NA	1	chr8	119122878	119122879	chr8:119122878-119122879	EXT1,	1	0
cg09273054	NA	0	0	0	0	0	NA	0	1	0	NA	0	0	NA	NA	0	0	0	NA	NA	0	0	0	0	0	0	0	NA	0	0	0	NA	NA	1	chr8	120220131	120220132	chr8:120220131-120220132	MAL2,	1	0
cg20864608	NA	0	0	0	0	1	NA	0	0	0	NA	0	0	NA	NA	0	0	0	NA	NA	0	0	0	1	0	0	0	NA	0	0	0	NA	NA	2	chr8	143533499	143533500	chr8:143533499-143533500	,	1	0
cg26731327	NA	0	0	0	0	1	NA	0	0	0	NA	0	0	NA	NA	0	0	0	NA	NA	0	0	0	0	0	0	0	NA	0	0	0	NA	NA	1	chr8	143591819	143591820	chr8:143591819-143591820	ADGRB1,	1	0
cg02539855	NA	0	0	0	0	1	NA	0	0	0	NA	0	0	NA	NA	0	0	0	NA	NA	0	0	0	1	0	0	0	NA	0	0	0	NA	NA	2	chr8	144241434	144241435	chr8:144241434-144241435	LY6H,	1	0
cg03168582	NA	0	0	0	0	1	NA	0	0	0	NA	0	0	NA	NA	0	0	0	NA	NA	0	0	0	1	0	0	0	NA	0	0	0	NA	NA	2	chr9	841850	841851	chr9:841850-841851	DMRT1,	1	0
cg21244846	NA	0	0	0	0	0	NA	0	0	0	NA	0	0	NA	NA	0	0	0	NA	NA	0	0	1	0	0	0	0	NA	0	0	0	NA	NA	1	chr9	27529339	27529340	chr9:27529339-27529340	MOB3B,	0	0
cg14306956	NA	0	0	1	0	0	NA	0	0	0	NA	0	0	NA	NA	0	0	0	NA	NA	0	0	0	0	0	0	0	NA	0	0	0	NA	NA	1	chr9	37027384	37027385	chr9:37027384-37027385	PAX5,	1	1
cg14170313	NA	0	0	0	0	1	NA	0	0	0	NA	0	0	NA	NA	0	0	0	NA	NA	0	0	0	0	0	0	0	NA	0	0	0	NA	NA	1	chr9	77112896	77112897	chr9:77112896-77112897	RORB, RORB-AS1,	1	1
cg21362478	NA	0	0	0	0	0	NA	0	0	0	NA	0	0	NA	NA	0	0	0	NA	NA	0	0	1	0	0	0	0	NA	0	0	0	NA	NA	1	chr9	78507352	78507353	chr9:78507352-78507353	PCSK5,	1	1
cg14487131	NA	0	0	1	0	0	NA	0	0	1	NA	0	0	NA	NA	0	0	0	NA	NA	0	0	0	0	0	0	0	NA	0	0	0	NA	NA	2	chr9	79633737	79633738	chr9:79633737-79633738	FOXB2,	1	0
cg14018731	NA	0	0	0	0	0	NA	0	0	0	NA	0	0	NA	NA	0	0	0	NA	NA	0	0	1	0	0	0	0	NA	0	0	0	NA	NA	1	chr9	98784336	98784337	chr9:98784336-98784337	ERCC6L2, LINC00092,	1	1
cg15802898	NA	0	0	0	0	1	NA	0	0	0	NA	0	0	NA	NA	0	0	0	NA	NA	0	0	0	1	0	0	0	NA	0	0	0	NA	NA	2	chr9	100615201	100615202	chr9:100615201-100615202	FOXE1,	1	0
cg18507707	NA	0	0	0	0	1	NA	0	0	0	NA	0	0	NA	NA	0	0	0	NA	NA	0	0	0	1	0	0	0	NA	0	0	0	NA	NA	2	chr9	101471553	101471554	chr9:101471553-101471554	GABBR2,	1	0
cg13952031	NA	0	0	0	0	1	NA	0	0	0	NA	0	0	NA	NA	0	0	0	NA	NA	0	0	0	0	0	0	0	NA	0	0	0	NA	NA	1	chr9	101706041	101706042	chr9:101706041-101706042	COL15A1,	1	0
cg18794577	NA	0	0	1	0	0	NA	0	0	0	NA	0	0	NA	NA	0	0	0	NA	NA	0	0	0	0	0	0	0	NA	0	0	0	NA	NA	1	chr9	104501030	104501031	chr9:104501030-104501031	GRIN3A,	1	0
cg02560967	NA	0	0	0	0	1	NA	0	0	0	NA	0	0	NA	NA	0	0	0	NA	NA	0	0	0	0	0	0	0	NA	0	0	0	NA	NA	1	chr9	112403301	112403302	chr9:112403301-112403302	PALM2,	1	0
cg14543508	NA	0	0	0	0	0	NA	0	1	0	NA	0	0	NA	NA	0	0	0	NA	NA	0	0	0	0	0	0	0	NA	0	0	0	NA	NA	1	chr9	123631308	123631309	chr9:123631308-123631309	PHF19,	0	0
cg18453621	NA	0	0	0	0	1	NA	0	0	0	NA	0	0	NA	NA	0	0	0	NA	NA	0	0	0	0	0	0	0	NA	0	0	0	NA	NA	1	chr9	129376904	129376905	chr9:129376904-129376905	LMX1B,	1	0
cg14015706	NA	0	0	0	0	1	NA	0	0	0	NA	0	0	NA	NA	0	0	0	NA	NA	0	0	0	1	0	0	0	NA	0	0	0	NA	NA	2	chr9	132382433	132382434	chr9:132382433-132382434	C9orf50, NTMT1,	1	0
cg14470978	NA	0	0	0	0	0	NA	0	0	0	NA	0	0	NA	NA	0	0	0	NA	NA	0	0	1	0	0	0	0	NA	0	0	0	NA	NA	1	chr9	132427640	132427641	chr9:132427640-132427641	PRRX2,	1	0
cg14236735	NA	0	0	0	0	1	NA	0	0	0	NA	0	0	NA	NA	0	0	0	NA	NA	0	0	0	0	0	0	0	NA	0	0	0	NA	NA	1	chr9	133536345	133536346	chr9:133536345-133536346	PRDM12,	1	0
cg21142738	NA	0	0	0	0	1	NA	0	0	0	NA	0	0	NA	NA	0	0	0	NA	NA	0	0	0	0	0	0	0	NA	0	0	0	NA	NA	1	chrX	6145730	6145731	chrX:6145730-6145731	LOC105373156, NLGN4X,	0	1
cg22189618	NA	0	0	1	0	0	NA	0	0	0	NA	0	0	NA	NA	0	0	0	NA	NA	0	0	0	0	0	0	0	NA	0	0	0	NA	NA	1	chrX	92928608	92928609	chrX:92928608-92928609	NAP1L3,	0	0
cg05124235	NA	0	0	1	0	1	NA	0	0	0	NA	0	0	NA	NA	0	0	0	NA	NA	0	0	0	0	0	0	0	NA	0	0	0	NA	NA	2	chrX	113816263	113816264	chrX:113816263-113816264	HTR2C,	1	0
cg02494853	NA	0	0	1	0	0	NA	0	0	0	NA	0	0	NA	NA	0	0	0	NA	NA	0	0	0	0	0	0	0	NA	0	0	0	NA	NA	1	chrY	4868397	4868398	chrY:4868397-4868398	PCDH11Y,	0	0

## Sheet: Hypomethylated Marker CpGs
CpG.ID	ACC	BLCA	BRCA	CESC	CHOL	COAD	DLBC	ESCA	GBM	HNSC	KICH	KIRC	KIRP	LAML	LGG	LIHC	LUAD	LUSC	MESO	OV	PAAD	PCPG	PRAD	READ	SARC	SKCM	STAD	TGCT	THCA	THYM	UCEC	UCS	UVM	sums	chr	start	end	CpG.position.hg19	annotation	polycomb.locus	noncoding.RNA.gene
cg12286462	NA	1	0	0	0	0	NA	0	0	0	NA	0	0	NA	NA	0	0	0	NA	NA	0	0	0	0	0	0	0	NA	0	0	0	NA	NA	1	chr1	1358109	1358110	chr1:1358109-1358110	ANKRD65, TMEM88B,	0	0
cg13874287	NA	0	0	0	0	0	NA	0	0	0	NA	0	0	NA	NA	1	0	0	NA	NA	0	0	0	0	0	0	0	NA	0	0	0	NA	NA	1	chr1	2820170	2820171	chr1:2820170-2820171	,	0	0
cg06316219	NA	0	0	0	0	0	NA	0	0	0	NA	0	0	NA	NA	1	0	0	NA	NA	0	0	0	0	0	0	0	NA	0	0	0	NA	NA	1	chr1	2834040	2834041	chr1:2834040-2834041	,	0	0
cg16298813	NA	1	1	0	0	0	NA	0	0	0	NA	0	0	NA	NA	1	0	0	NA	NA	0	0	0	0	0	0	0	NA	0	0	0	NA	NA	3	chr1	2878455	2878456	chr1:2878455-2878456	,	0	0
cg15823330	NA	0	0	0	0	0	NA	0	0	0	NA	0	0	NA	NA	0	0	0	NA	NA	0	0	0	0	0	1	0	NA	0	0	0	NA	NA	1	chr1	3207539	3207540	chr1:3207539-3207540	PRDM16,	0	0
cg13479148	NA	0	0	0	0	1	NA	0	0	0	NA	0	0	NA	NA	0	0	0	NA	NA	0	0	0	1	0	0	0	NA	0	0	1	NA	NA	3	chr1	3354433	3354434	chr1:3354433-3354434	PRDM16,	0	0
cg10400362	NA	0	0	0	0	0	NA	0	0	0	NA	0	0	NA	NA	1	0	0	NA	NA	0	0	0	0	0	0	0	NA	0	0	0	NA	NA	1	chr1	4832549	4832550	chr1:4832549-4832550	AJAP1,	0	0
cg26353694	NA	0	0	0	0	0	NA	0	0	0	NA	0	0	NA	NA	1	0	0	NA	NA	0	0	0	0	0	0	0	NA	0	0	0	NA	NA	1	chr1	4841940	4841941	chr1:4841940-4841941	AJAP1,	0	0
cg05962033	NA	0	0	0	0	0	NA	0	0	0	NA	0	0	NA	NA	0	0	0	NA	NA	0	1	0	0	0	0	0	NA	0	0	0	NA	NA	1	chr1	5946328	5946329	chr1:5946328-5946329	NPHP4,	0	1
cg24152353	NA	1	0	0	0	0	NA	0	0	0	NA	0	0	NA	NA	0	0	0	NA	NA	0	0	0	0	0	0	0	NA	0	0	0	NA	NA	1	chr1	6149107	6149108	chr1:6149107-6149108	KCNAB2,	0	0
cg13488186	NA	0	0	0	0	0	NA	0	0	0	NA	0	0	NA	NA	0	0	0	NA	NA	0	1	0	0	0	0	0	NA	0	0	0	NA	NA	1	chr1	7830103	7830104	chr1:7830103-7830104	CAMTA1, VAMP3,	0	0
cg03741850	NA	0	0	0	0	0	NA	0	0	0	NA	0	0	NA	NA	0	0	0	NA	NA	0	1	0	0	0	0	0	NA	0	0	0	NA	NA	1	chr1	9664395	9664396	chr1:9664395-9664396	TMEM201,	0	0
cg24502224	NA	0	0	0	0	0	NA	0	0	0	NA	0	0	NA	NA	0	0	0	NA	NA	0	1	0	0	0	0	0	NA	0	0	0	NA	NA	1	chr1	10684339	10684340	chr1:10684339-10684340	PEX14,	0	0
cg15980363	NA	0	0	0	0	0	NA	0	0	0	NA	0	0	NA	NA	0	0	0	NA	NA	0	0	0	0	0	1	0	NA	0	0	0	NA	NA	1	chr1	12908251	12908252	chr1:12908251-12908252	HNRNPCL1,	0	0
cg00906794	NA	0	0	0	0	0	NA	0	0	0	NA	0	0	NA	NA	0	0	0	NA	NA	0	0	0	0	0	1	0	NA	0	0	0	NA	NA	1	chr1	13184214	13184215	chr1:13184214-13184215	HNRNPCL2,	0	0
cg18771659	NA	0	0	0	0	0	NA	0	0	0	NA	0	0	NA	NA	1	0	0	NA	NA	0	0	0	0	0	0	0	NA	0	0	0	NA	NA	1	chr1	153002762	153002763	chr1:153002762-153002763	SPRR1B,	0	0
cg18087023	NA	0	0	0	0	0	NA	0	0	0	NA	0	0	NA	NA	1	0	0	NA	NA	0	1	0	0	0	1	0	NA	0	0	0	NA	NA	3	chr1	153014956	153014957	chr1:153014956-153014957	SPRR2D,	0	0
cg08244156	NA	0	0	0	0	0	NA	0	0	0	NA	0	0	NA	NA	1	0	0	NA	NA	0	0	0	0	0	0	0	NA	0	0	0	NA	NA	1	chr1	153283712	153283713	chr1:153283712-153283713	PGLYRP3,	0	0
cg01637734	NA	0	0	0	0	0	NA	0	0	0	NA	0	0	NA	NA	1	0	0	NA	NA	0	1	0	0	0	0	0	NA	0	0	0	NA	NA	2	chr1	157811303	157811304	chr1:157811303-157811304	CD5L,	0	0
cg09149672	NA	0	1	0	0	0	NA	0	0	0	NA	0	0	NA	NA	1	0	0	NA	NA	0	1	0	0	0	0	0	NA	0	0	0	NA	NA	3	chr1	158261151	158261152	chr1:158261151-158261152	CD1C,	0	0
cg10976626	NA	0	0	0	0	0	NA	0	0	0	NA	0	0	NA	NA	1	0	0	NA	NA	0	1	0	0	0	1	0	NA	0	0	0	NA	NA	3	chr1	158322841	158322842	chr1:158322841-158322842	CD1E,	0	0
cg26151206	NA	1	1	0	0	0	NA	0	0	1	NA	0	0	NA	NA	1	0	1	NA	NA	0	0	0	0	0	1	0	NA	0	0	1	NA	NA	7	chr1	158390649	158390650	chr1:158390649-158390650	OR10K2,	0	0
cg24440526	NA	0	0	0	0	0	NA	0	0	0	NA	0	0	NA	NA	1	0	0	NA	NA	0	0	0	0	0	0	0	NA	0	0	0	NA	NA	1	chr1	158517489	158517490	chr1:158517489-158517490	OR6Y1,	0	0
cg00119186	NA	1	0	0	0	0	NA	0	0	0	NA	0	0	NA	NA	1	0	0	NA	NA	0	0	0	0	0	0	0	NA	0	0	0	NA	NA	2	chr1	158670124	158670125	chr1:158670124-158670125	OR6K2,	0	0
cg01365152	NA	1	0	0	0	0	NA	0	0	0	NA	0	0	NA	NA	0	0	0	NA	NA	0	1	0	0	0	0	0	NA	0	0	0	NA	NA	2	chr1	159683813	159683814	chr1:159683813-159683814	CRP,	0	0
cg11336590	NA	0	0	0	0	0	NA	0	0	0	NA	0	0	NA	NA	0	0	0	NA	NA	0	0	0	1	0	0	0	NA	0	0	0	NA	NA	1	chr1	166958322	166958323	chr1:166958322-166958323	MAEL,	0	0
cg04402078	NA	0	0	0	0	0	NA	0	0	0	NA	0	0	NA	NA	0	0	0	NA	NA	0	1	0	0	0	0	0	NA	0	0	0	NA	NA	1	chr1	171308645	171308646	chr1:171308645-171308646	FMO4, TOP1P1,	0	1
cg02913918	NA	0	0	0	0	0	NA	0	0	0	NA	0	0	NA	NA	1	0	0	NA	NA	0	0	0	0	0	0	0	NA	0	0	0	NA	NA	1	chr1	181767609	181767610	chr1:181767609-181767610	CACNA1E,	0	0
cg19639967	NA	0	0	0	0	0	NA	0	0	0	NA	0	0	NA	NA	1	0	0	NA	NA	0	0	0	0	0	0	0	NA	0	0	0	NA	NA	1	chr1	198907662	198907663	chr1:198907662-198907663	MIR181A1HG,	0	1
cg17504886	NA	0	0	0	0	0	NA	0	0	0	NA	0	0	NA	NA	0	0	0	NA	NA	0	1	0	0	0	0	0	NA	0	0	0	NA	NA	1	chr1	207642938	207642939	chr1:207642938-207642939	CR2,	0	0
cg24410391	NA	0	0	0	0	0	NA	0	0	0	NA	0	0	NA	NA	0	0	0	NA	NA	0	0	0	1	0	0	0	NA	0	0	0	NA	NA	1	chr1	213189773	213189774	chr1:213189773-213189774	ANGEL2,	0	1
cg02079463	NA	0	0	0	0	0	NA	0	0	0	NA	0	0	NA	NA	1	0	0	NA	NA	0	0	0	0	0	0	0	NA	0	0	0	NA	NA	1	chr1	240874946	240874947	chr1:240874946-240874947	MIR1273E,	0	1
cg09509553	NA	0	0	0	0	0	NA	0	0	0	NA	0	0	NA	NA	1	0	0	NA	NA	0	0	0	0	0	0	0	NA	0	0	0	NA	NA	1	chr1	240986512	240986513	chr1:240986512-240986513	RGS7,	0	0
cg24068020	NA	0	0	0	0	0	NA	0	0	0	NA	0	0	NA	NA	0	0	0	NA	NA	0	0	0	0	0	0	0	NA	0	0	1	NA	NA	1	chr1	244142785	244142786	chr1:244142785-244142786	LOC339529,	0	1
cg14422922	NA	0	0	0	0	0	NA	0	0	0	NA	0	0	NA	NA	1	0	0	NA	NA	0	0	0	0	0	0	0	NA	0	0	0	NA	NA	1	chr1	247614727	247614728	chr1:247614727-247614728	OR2B11,	0	0
cg03773882	NA	0	0	0	0	0	NA	0	0	0	NA	0	0	NA	NA	1	0	0	NA	NA	0	0	0	0	0	1	0	NA	0	0	0	NA	NA	2	chr1	247921487	247921488	chr1:247921487-247921488	OR1C1,	0	0
cg16027403	NA	1	0	0	0	0	NA	0	0	0	NA	0	0	NA	NA	1	0	0	NA	NA	0	0	0	0	0	1	0	NA	0	0	0	NA	NA	3	chr1	247978791	247978792	chr1:247978791-247978792	OR14A16,	0	0
cg11606050	NA	0	0	0	0	0	NA	0	0	0	NA	0	0	NA	NA	1	0	0	NA	NA	0	0	0	0	0	0	0	NA	0	0	0	NA	NA	1	chr1	248005246	248005247	chr1:248005246-248005247	OR11L1,	0	0
cg18964985	NA	0	0	0	0	0	NA	0	0	0	NA	0	0	NA	NA	1	0	0	NA	NA	0	0	0	0	0	0	0	NA	0	0	0	NA	NA	1	chr1	248285936	248285937	chr1:248285936-248285937	OR2M1P,	0	1
cg06832985	NA	0	0	0	0	0	NA	0	0	0	NA	0	0	NA	NA	1	0	0	NA	NA	0	0	0	0	0	0	0	NA	0	0	0	NA	NA	1	chr1	248651841	248651842	chr1:248651841-248651842	OR2T5,	0	0
cg07395806	NA	0	0	0	0	0	NA	0	0	0	NA	0	0	NA	NA	1	0	0	NA	NA	0	0	0	0	0	0	0	NA	0	0	0	NA	NA	1	chr1	248684628	248684629	chr1:248684628-248684629	OR2G6,	0	0
cg02064848	NA	0	0	0	0	0	NA	0	0	0	NA	0	0	NA	NA	1	0	0	NA	NA	0	0	0	0	0	0	0	NA	0	0	0	NA	NA	1	chr1	248722840	248722841	chr1:248722840-248722841	OR2T29,	0	0
cg26396278	NA	0	0	0	0	0	NA	0	0	0	NA	0	0	NA	NA	1	0	0	NA	NA	0	0	0	0	0	0	0	NA	0	0	0	NA	NA	1	chr1	248814155	248814156	chr1:248814155-248814156	OR2T27,	0	0
cg00332951	NA	0	0	0	0	0	NA	0	0	0	NA	0	0	NA	NA	0	0	0	NA	NA	0	0	0	1	0	0	0	NA	0	0	0	NA	NA	1	chr10	518470	518471	chr10:518470-518471	DIP2C,	0	0
cg16549151	NA	0	0	0	0	0	NA	0	0	0	NA	0	0	NA	NA	1	0	0	NA	NA	0	0	0	0	0	0	0	NA	0	0	0	NA	NA	1	chr10	1713900	1713901	chr10:1713900-1713901	ADARB2,	0	0
cg15622527	NA	1	0	0	0	0	NA	0	0	0	NA	0	0	NA	NA	1	0	0	NA	NA	0	0	0	0	0	0	0	NA	0	0	0	NA	NA	2	chr10	1749494	1749495	chr10:1749494-1749495	ADARB2,	0	0
cg12090430	NA	0	0	0	0	0	NA	0	0	0	NA	0	0	NA	NA	1	0	0	NA	NA	0	0	0	0	0	0	0	NA	0	0	0	NA	NA	1	chr10	1769480	1769481	chr10:1769480-1769481	ADARB2,	0	0
cg09810961	NA	1	0	0	0	0	NA	0	0	0	NA	0	0	NA	NA	1	0	0	NA	NA	0	0	0	0	0	0	0	NA	0	0	0	NA	NA	2	chr10	1850372	1850373	chr10:1850372-1850373	,	0	0
cg15412682	NA	0	0	0	0	0	NA	0	0	0	NA	0	0	NA	NA	1	0	0	NA	NA	0	0	0	0	0	1	0	NA	0	0	0	NA	NA	2	chr10	2035312	2035313	chr10:2035312-2035313	,	0	0
cg07513950	NA	1	0	0	0	0	NA	0	0	0	NA	0	0	NA	NA	1	0	0	NA	NA	0	0	0	0	0	0	0	NA	0	0	0	NA	NA	2	chr10	2371032	2371033	chr10:2371032-2371033	,	0	0
cg04060075	NA	0	0	0	0	0	NA	0	0	0	NA	0	0	NA	NA	1	0	0	NA	NA	0	0	0	0	0	0	0	NA	0	0	0	NA	NA	1	chr10	2667076	2667077	chr10:2667076-2667077	,	0	0
cg14770389	NA	0	0	0	0	1	NA	1	0	1	NA	0	1	NA	NA	0	0	0	NA	NA	0	0	0	1	0	0	0	NA	0	0	0	NA	NA	5	chr10	2992150	2992151	chr10:2992150-2992151	,	0	0
cg26869412	NA	1	0	0	0	0	NA	0	0	0	NA	0	0	NA	NA	0	0	0	NA	NA	0	0	0	0	0	0	0	NA	0	0	0	NA	NA	1	chr10	3023801	3023802	chr10:3023801-3023802	,	0	0
cg12037895	NA	0	0	0	0	0	NA	0	0	0	NA	0	0	NA	NA	1	0	0	NA	NA	0	0	0	0	0	0	0	NA	0	0	0	NA	NA	1	chr10	3058175	3058176	chr10:3058175-3058176	,	0	0
cg06271630	NA	1	0	0	0	0	NA	0	0	0	NA	0	0	NA	NA	0	0	0	NA	NA	0	0	0	1	0	0	0	NA	0	0	1	NA	NA	3	chr10	3329765	3329766	chr10:3329765-3329766	,	0	0
cg24258896	NA	0	0	0	0	0	NA	0	0	0	NA	0	0	NA	NA	0	0	0	NA	NA	0	0	0	1	0	0	0	NA	0	0	0	NA	NA	1	chr10	3983548	3983549	chr10:3983548-3983549	,	0	0
cg25971042	NA	0	0	0	0	0	NA	0	0	0	NA	0	0	NA	NA	1	0	0	NA	NA	0	0	0	0	0	0	0	NA	0	0	0	NA	NA	1	chr10	7139374	7139375	chr10:7139374-7139375	,	0	0
cg19104196	NA	0	0	0	0	0	NA	0	0	0	NA	0	0	NA	NA	1	0	0	NA	NA	0	0	0	0	0	0	0	NA	0	0	0	NA	NA	1	chr10	7214172	7214173	chr10:7214172-7214173	SFMBT2,	0	0
cg07001508	NA	0	0	0	0	0	NA	0	0	0	NA	0	0	NA	NA	1	0	0	NA	NA	0	0	0	0	0	0	0	NA	0	0	0	NA	NA	1	chr10	8203891	8203892	chr10:8203891-8203892	,	0	0
cg17106572	NA	1	0	0	0	0	NA	0	0	0	NA	0	0	NA	NA	1	0	0	NA	NA	0	0	0	0	0	0	0	NA	0	0	0	NA	NA	2	chr10	10994034	10994035	chr10:10994034-10994035	CELF2, LINC00710,	0	1
cg12488005	NA	0	0	0	0	0	NA	0	0	0	NA	0	0	NA	NA	1	0	0	NA	NA	0	0	0	0	0	0	0	NA	0	0	0	NA	NA	1	chr10	11386143	11386144	chr10:11386143-11386144	CELF2-AS1,	0	1
cg11532418	NA	1	0	0	0	0	NA	0	0	0	NA	0	0	NA	NA	0	0	0	NA	NA	0	0	0	0	0	0	0	NA	0	0	0	NA	NA	1	chr10	78647178	78647179	chr10:78647178-78647179	KCNMA1,	0	0
cg12846232	NA	0	0	0	0	0	NA	0	0	0	NA	0	0	NA	NA	0	0	0	NA	NA	0	1	0	0	0	0	0	NA	0	0	0	NA	NA	1	chr10	103553411	103553412	chr10:103553411-103553412	MGEA5,	0	0
cg17342141	NA	0	0	0	0	0	NA	0	0	1	NA	0	0	NA	NA	0	0	0	NA	NA	0	0	0	0	0	0	0	NA	0	0	1	NA	NA	2	chr10	124459311	124459312	chr10:124459311-124459312	C10orf120,	0	0
cg26381481	NA	0	0	0	0	0	NA	0	0	0	NA	0	0	NA	NA	0	0	0	NA	NA	0	1	0	0	0	0	0	NA	0	0	0	NA	NA	1	chr10	126184721	126184722	chr10:126184721-126184722	LHPP,	0	0
cg17014214	NA	0	0	0	0	0	NA	0	0	0	NA	0	0	NA	NA	0	0	0	NA	NA	0	1	0	0	0	0	0	NA	0	0	0	NA	NA	1	chr10	126713638	126713639	chr10:126713638-126713639	CTBP2,	0	0
cg17766828	NA	0	0	0	0	0	NA	0	0	0	NA	0	0	NA	NA	1	0	0	NA	NA	0	0	0	0	0	0	0	NA	0	0	0	NA	NA	1	chr10	127371728	127371729	chr10:127371728-127371729	LOC283038, TEX36,	0	1
cg00792723	NA	0	0	0	0	0	NA	0	0	0	NA	0	0	NA	NA	0	0	0	NA	NA	0	0	0	0	0	1	0	NA	0	0	0	NA	NA	1	chr10	130123624	130123625	chr10:130123624-130123625	,	0	0
cg07132187	NA	0	0	0	0	0	NA	0	0	0	NA	0	0	NA	NA	1	0	0	NA	NA	0	0	0	0	0	0	0	NA	0	0	0	NA	NA	1	chr10	130300318	130300319	chr10:130300318-130300319	,	0	0
cg11273848	NA	0	0	0	0	0	NA	0	0	0	NA	0	0	NA	NA	1	0	0	NA	NA	0	0	0	0	0	0	0	NA	0	0	0	NA	NA	1	chr10	130506845	130506846	chr10:130506845-130506846	,	0	0
cg21368402	NA	0	0	0	0	0	NA	0	0	0	NA	0	0	NA	NA	0	0	0	NA	NA	0	0	0	0	0	0	0	NA	0	0	1	NA	NA	1	chr10	130507705	130507706	chr10:130507705-130507706	,	0	0
cg13501803	NA	0	0	0	0	0	NA	0	0	0	NA	0	0	NA	NA	0	0	0	NA	NA	0	0	0	0	0	1	0	NA	0	0	0	NA	NA	1	chr10	130519843	130519844	chr10:130519843-130519844	,	0	0
cg19707069	NA	0	0	0	0	0	NA	0	0	0	NA	0	0	NA	NA	0	0	0	NA	NA	0	0	0	0	0	1	0	NA	0	0	0	NA	NA	1	chr10	130789461	130789462	chr10:130789461-130789462	,	0	0
cg01383345	NA	0	0	0	0	0	NA	0	0	0	NA	0	0	NA	NA	0	0	0	NA	NA	0	0	0	0	0	1	0	NA	0	0	0	NA	NA	1	chr10	131190460	131190461	chr10:131190460-131190461	,	0	0
cg02576528	NA	0	0	0	0	0	NA	0	0	0	NA	0	0	NA	NA	0	0	0	NA	NA	0	0	0	0	0	0	0	NA	0	0	1	NA	NA	1	chr10	131845025	131845026	chr10:131845025-131845026	,	0	0
cg06996389	NA	0	1	0	0	0	NA	0	0	0	NA	0	0	NA	NA	0	0	0	NA	NA	0	0	0	0	0	1	0	NA	0	0	0	NA	NA	2	chr10	132546174	132546175	chr10:132546174-132546175	,	0	0
cg08483912	NA	0	0	0	0	0	NA	0	0	0	NA	0	0	NA	NA	1	0	0	NA	NA	0	0	0	0	0	0	0	NA	0	0	0	NA	NA	1	chr10	132632041	132632042	chr10:132632041-132632042	,	0	0
cg11935812	NA	0	0	0	0	0	NA	0	0	0	NA	0	0	NA	NA	1	0	0	NA	NA	0	0	0	0	0	0	0	NA	0	0	0	NA	NA	1	chr10	133000405	133000406	chr10:133000405-133000406	TCERG1L,	0	0
cg07810282	NA	0	0	0	0	0	NA	0	0	0	NA	0	0	NA	NA	1	0	0	NA	NA	0	0	0	0	0	0	0	NA	0	0	0	NA	NA	1	chr10	133058601	133058602	chr10:133058601-133058602	TCERG1L,	0	0
cg19961228	NA	1	0	0	0	0	NA	0	0	0	NA	0	0	NA	NA	0	0	0	NA	NA	0	0	0	0	0	0	0	NA	0	0	0	NA	NA	1	chr10	133326951	133326952	chr10:133326951-133326952	,	0	0
cg05363081	NA	1	0	0	0	0	NA	0	0	0	NA	0	0	NA	NA	0	0	0	NA	NA	0	0	0	0	0	0	0	NA	0	0	0	NA	NA	1	chr10	133508442	133508443	chr10:133508442-133508443	,	1	0
cg04064828	NA	0	0	0	0	0	NA	0	0	0	NA	0	0	NA	NA	0	0	0	NA	NA	0	0	0	0	0	0	0	NA	0	0	1	NA	NA	1	chr10	134002751	134002752	chr10:134002751-134002752	DPYSL4,	1	0
cg03647436	NA	0	0	0	0	0	NA	0	0	0	NA	0	0	NA	NA	0	0	0	NA	NA	0	0	0	0	0	1	0	NA	0	0	0	NA	NA	1	chr10	134477441	134477442	chr10:134477441-134477442	INPP5A,	0	0
cg09837243	NA	0	0	0	0	0	NA	0	0	0	NA	0	0	NA	NA	0	0	0	NA	NA	0	0	0	1	0	0	0	NA	0	0	0	NA	NA	1	chr10	134631140	134631141	chr10:134631140-134631141	CFAP46,	0	0
cg16221555	NA	0	0	0	0	0	NA	0	0	0	NA	0	0	NA	NA	1	0	0	NA	NA	0	0	0	0	0	0	0	NA	0	0	0	NA	NA	1	chr10	134694351	134694352	chr10:134694351-134694352	CFAP46,	1	0
cg00647046	NA	1	0	0	0	0	NA	0	0	0	NA	0	0	NA	NA	0	0	0	NA	NA	0	0	0	1	0	0	0	NA	0	0	0	NA	NA	2	chr10	134734612	134734613	chr10:134734612-134734613	CFAP46,	0	0
cg26369315	NA	0	0	0	0	0	NA	0	0	0	NA	0	0	NA	NA	1	0	0	NA	NA	0	0	0	0	0	0	0	NA	0	0	0	NA	NA	1	chr10	134912228	134912229	chr10:134912228-134912229	ADGRA1,	0	0
cg08815970	NA	0	0	0	0	0	NA	0	0	0	NA	0	0	NA	NA	0	0	0	NA	NA	0	0	0	0	0	0	0	NA	0	0	1	NA	NA	1	chr10	134994424	134994425	chr10:134994424-134994425	KNDC1,	0	0
cg17247026	NA	0	0	0	0	0	NA	0	0	0	NA	0	0	NA	NA	0	0	0	NA	NA	0	0	0	0	0	0	0	NA	0	0	1	NA	NA	1	chr10	135153937	135153938	chr10:135153937-135153938	CALY,	1	0
cg07538239	NA	0	0	0	0	0	NA	0	0	0	NA	0	0	NA	NA	0	0	0	NA	NA	0	0	0	0	0	0	0	NA	0	0	1	NA	NA	1	chr11	1467081	1467082	chr11:1467081-1467082	BRSK2,	0	1
cg25150846	NA	0	0	0	0	0	NA	0	0	0	NA	0	0	NA	NA	0	0	0	NA	NA	0	1	0	0	0	0	0	NA	0	0	0	NA	NA	1	chr11	2189591	2189592	chr11:2189591-2189592	TH,	1	0
cg03067903	NA	0	0	0	0	0	NA	0	0	0	NA	0	0	NA	NA	0	0	0	NA	NA	0	0	0	0	0	1	0	NA	0	0	0	NA	NA	1	chr11	4606632	4606633	chr11:4606632-4606633	OR52I2,	0	0
cg23392097	NA	0	0	0	0	0	NA	0	0	0	NA	0	0	NA	NA	0	0	0	NA	NA	0	0	0	0	0	1	0	NA	0	0	0	NA	NA	1	chr11	4704749	4704750	chr11:4704749-4704750	OR51E2,	0	0
cg15889462	NA	0	0	0	0	0	NA	0	0	0	NA	0	0	NA	NA	1	0	0	NA	NA	0	0	0	0	0	1	0	NA	0	0	0	NA	NA	2	chr11	4825640	4825641	chr11:4825640-4825641	OR52R1,	0	0
cg19138905	NA	0	0	0	0	0	NA	0	0	0	NA	0	0	NA	NA	1	0	0	NA	NA	0	0	0	0	0	1	0	NA	0	0	0	NA	NA	2	chr11	4902583	4902584	chr11:4902583-4902584	OR51T1,	0	0
cg23520574	NA	1	0	0	0	0	NA	0	0	0	NA	0	0	NA	NA	0	0	0	NA	NA	0	0	0	0	0	1	0	NA	0	0	0	NA	NA	2	chr11	4928572	4928573	chr11:4928572-4928573	OR51A7,	0	0
cg05316601	NA	0	0	0	0	0	NA	0	0	0	NA	0	0	NA	NA	1	0	0	NA	NA	0	0	0	0	0	1	0	NA	0	0	0	NA	NA	2	chr11	5008936	5008937	chr11:5008936-5008937	MMP26,	0	0
cg22677048	NA	0	0	0	0	0	NA	0	0	0	NA	0	0	NA	NA	1	0	0	NA	NA	0	0	0	0	0	1	0	NA	0	0	0	NA	NA	2	chr11	5345539	5345540	chr11:5345539-5345540	OR51B2,	0	0
cg09232851	NA	0	0	0	0	1	NA	0	0	0	NA	0	0	NA	NA	0	0	0	NA	NA	0	0	0	1	0	0	0	NA	0	0	0	NA	NA	2	chr11	5538030	5538031	chr11:5538030-5538031	OLFM5P, UBQLNL,	0	1
cg14486463	NA	0	0	0	0	0	NA	0	0	0	NA	0	0	NA	NA	0	0	0	NA	NA	0	1	0	0	0	0	0	NA	0	0	0	NA	NA	1	chr11	5602027	5602028	chr11:5602027-5602028	OR52B6,	0	0
cg16309319	NA	0	0	0	0	0	NA	0	1	0	NA	0	0	NA	NA	0	0	0	NA	NA	0	0	0	0	0	0	0	NA	0	0	0	NA	NA	1	chr11	6191393	6191394	chr11:6191393-6191394	OR52B2,	0	0
cg20620783	NA	0	0	0	0	0	NA	0	0	0	NA	0	0	NA	NA	1	0	0	NA	NA	0	0	0	0	0	1	0	NA	0	0	0	NA	NA	2	chr11	7870238	7870239	chr11:7870238-7870239	LOC283299, OR5E1P,	0	1
cg27410165	NA	0	0	0	0	0	NA	0	0	0	NA	0	0	NA	NA	1	0	0	NA	NA	0	0	0	0	0	0	0	NA	0	0	0	NA	NA	1	chr11	18978169	18978170	chr11:18978169-18978170	,	0	0
cg23840988	NA	0	0	0	0	0	NA	0	0	0	NA	0	0	NA	NA	0	0	0	NA	NA	0	0	0	0	0	1	0	NA	0	0	0	NA	NA	1	chr11	45727888	45727889	chr11:45727888-45727889	,	1	0
cg14642259	NA	1	0	1	0	1	NA	0	0	1	NA	0	0	NA	NA	0	0	1	NA	NA	0	0	0	1	0	0	1	NA	0	0	0	NA	NA	7	chr11	47359017	47359018	chr11:47359017-47359018	MYBPC3,	0	0
cg18125814	NA	1	0	0	0	0	NA	0	0	0	NA	0	0	NA	NA	0	0	0	NA	NA	0	0	0	0	0	0	0	NA	0	0	0	NA	NA	1	chr11	49455214	49455215	chr11:49455214-49455215	,	0	0
cg23352271	NA	0	0	0	0	0	NA	0	0	0	NA	0	0	NA	NA	1	0	0	NA	NA	0	0	0	0	0	0	0	NA	0	0	0	NA	NA	1	chr11	49915274	49915275	chr11:49915274-49915275	,	0	0
cg08184936	NA	0	0	0	0	0	NA	0	0	0	NA	0	0	NA	NA	1	0	0	NA	NA	0	0	0	0	0	0	0	NA	0	0	0	NA	NA	1	chr11	50219952	50219953	chr11:50219952-50219953	,	0	0
cg24205065	NA	0	0	0	0	0	NA	0	0	0	NA	0	0	NA	NA	1	0	0	NA	NA	0	0	0	0	0	1	0	NA	0	0	0	NA	NA	2	chr11	50238107	50238108	chr11:50238107-50238108	LOC441601,	0	1
cg16547859	NA	0	0	0	0	0	NA	0	0	0	NA	0	0	NA	NA	0	0	0	NA	NA	0	0	0	0	0	1	0	NA	0	0	0	NA	NA	1	chr11	58605845	58605846	chr11:58605845-58605846	GLYATL2,	0	0
cg25321462	NA	0	0	0	0	0	NA	0	0	0	NA	0	0	NA	NA	1	0	0	NA	NA	0	0	0	0	0	0	0	NA	0	0	0	NA	NA	1	chr11	60282742	60282743	chr11:60282742-60282743	MS4A13,	0	0
cg13857569	NA	0	0	0	0	0	NA	0	0	0	NA	0	0	NA	NA	0	0	0	NA	NA	0	1	0	0	0	0	0	NA	0	0	0	NA	NA	1	chr11	75114506	75114507	chr11:75114506-75114507	RPS3,	0	0
cg22658979	NA	0	0	0	0	1	NA	0	0	0	NA	0	0	NA	NA	0	0	0	NA	NA	0	0	0	1	0	0	0	NA	0	0	0	NA	NA	2	chr11	102826469	102826470	chr11:102826469-102826470	MMP13,	0	0
cg20213962	NA	0	0	0	0	0	NA	0	0	0	NA	0	0	NA	NA	0	0	0	NA	NA	0	1	0	0	0	0	0	NA	0	0	0	NA	NA	1	chr11	113143807	113143808	chr11:113143807-113143808	NCAM1, NCAM1-AS1,	0	1
cg04586748	NA	0	0	0	0	0	NA	0	0	0	NA	0	0	NA	NA	0	0	0	NA	NA	0	0	0	0	0	0	0	NA	0	0	1	NA	NA	1	chr11	114113047	114113048	chr11:114113047-114113048	ZBTB16,	0	0
cg17538768	NA	0	0	0	0	0	NA	0	0	0	NA	0	0	NA	NA	1	0	0	NA	NA	0	0	0	0	0	0	0	NA	0	0	0	NA	NA	1	chr11	123626540	123626541	chr11:123626540-123626541	OR6X1,	0	0
cg08417719	NA	0	0	0	0	0	NA	0	0	0	NA	0	0	NA	NA	1	0	0	NA	NA	0	0	0	0	0	0	0	NA	0	0	0	NA	NA	1	chr11	123814620	123814621	chr11:123814620-123814621	OR4D5, OR6T1,	0	0
cg00320138	NA	0	0	0	0	0	NA	0	0	0	NA	0	0	NA	NA	0	0	0	NA	NA	0	0	0	0	0	1	0	NA	0	0	0	NA	NA	1	chr11	124181369	124181370	chr11:124181369-124181370	OR8D1,	0	0
cg17590805	NA	0	0	0	0	0	NA	0	0	0	NA	0	0	NA	NA	0	0	0	NA	NA	0	0	0	1	0	0	0	NA	0	0	0	NA	NA	1	chr11	128680490	128680491	chr11:128680490-128680491	FLI1,	0	0
cg13689118	NA	0	0	0	0	0	NA	0	0	0	NA	0	0	NA	NA	0	0	0	NA	NA	0	1	0	0	0	0	0	NA	0	0	0	NA	NA	1	chr11	130079780	130079781	chr11:130079780-130079781	ST14,	0	0
cg23971226	NA	0	0	0	0	0	NA	0	0	0	NA	0	0	NA	NA	1	0	0	NA	NA	0	0	0	0	0	0	0	NA	0	0	0	NA	NA	1	chr11	133770764	133770765	chr11:133770764-133770765	MIR4697HG,	0	1
cg06937491	NA	1	0	0	0	0	NA	0	0	0	NA	0	0	NA	NA	1	0	1	NA	NA	0	0	0	0	0	0	0	NA	0	0	0	NA	NA	3	chr12	1943722	1943723	chr12:1943722-1943723	CACNA2D4, LRTM2,	1	0
cg12205822	NA	0	0	0	0	0	NA	0	0	0	NA	0	0	NA	NA	1	0	0	NA	NA	0	0	0	0	0	0	0	NA	0	0	0	NA	NA	1	chr12	2613941	2613942	chr12:2613941-2613942	CACNA1C,	1	0
cg20557710	NA	0	0	0	0	0	NA	0	0	0	NA	0	0	NA	NA	1	0	0	NA	NA	0	0	0	0	0	0	0	NA	0	0	0	NA	NA	1	chr12	2788782	2788783	chr12:2788782-2788783	CACNA1C, CACNA1C-AS1,	0	1
cg02772266	NA	0	0	0	0	0	NA	0	0	0	NA	0	0	NA	NA	0	0	0	NA	NA	0	0	0	0	0	0	0	NA	0	0	1	NA	NA	1	chr12	4060781	4060782	chr12:4060781-4060782	,	0	0
cg00052903	NA	0	0	0	0	0	NA	0	0	0	NA	0	0	NA	NA	0	0	0	NA	NA	0	0	0	0	0	0	0	NA	0	0	1	NA	NA	1	chr12	11422897	11422898	chr12:11422897-11422898	PRB3,	0	0
cg26714388	NA	0	0	0	0	0	NA	0	0	0	NA	0	0	NA	NA	0	0	1	NA	NA	0	0	0	0	0	0	0	NA	0	0	1	NA	NA	2	chr12	34488729	34488730	chr12:34488729-34488730	,	0	0
cg01893629	NA	1	0	0	0	0	NA	0	0	0	NA	0	0	NA	NA	0	0	0	NA	NA	0	0	0	0	0	0	0	NA	0	0	1	NA	NA	2	chr12	34494825	34494826	chr12:34494825-34494826	,	0	0
cg10505355	NA	0	0	0	0	0	NA	0	0	0	NA	0	0	NA	NA	1	0	0	NA	NA	0	0	0	0	0	0	0	NA	0	0	0	NA	NA	1	chr12	48875573	48875574	chr12:48875573-48875574	C12orf54,	0	0
cg11871280	NA	0	0	0	0	0	NA	0	0	0	NA	0	0	NA	NA	0	0	0	NA	NA	0	0	0	1	0	0	0	NA	0	0	1	NA	NA	2	chr12	60082038	60082039	chr12:60082038-60082039	SLC16A7,	0	0
cg00030523	NA	0	0	0	0	0	NA	0	0	0	NA	0	0	NA	NA	0	0	0	NA	NA	0	0	0	0	0	1	0	NA	0	0	0	NA	NA	1	chr12	97885353	97885354	chr12:97885353-97885354	RMST,	0	1
cg17860133	NA	0	0	0	0	0	NA	0	0	0	NA	0	0	NA	NA	0	0	0	NA	NA	0	1	0	0	0	0	0	NA	0	0	0	NA	NA	1	chr12	117468345	117468346	chr12:117468345-117468346	FBXW8,	0	0
cg26787589	NA	1	0	0	0	0	NA	0	0	0	NA	0	0	NA	NA	0	0	0	NA	NA	0	0	0	0	0	0	0	NA	0	0	0	NA	NA	1	chr12	126926911	126926912	chr12:126926911-126926912	LINC02347,	0	1
cg18942757	NA	0	0	0	0	0	NA	0	0	0	NA	0	0	NA	NA	0	0	0	NA	NA	0	0	0	0	0	0	0	NA	0	0	1	NA	NA	1	chr12	126926925	126926926	chr12:126926925-126926926	LINC02347,	0	1
cg03667228	NA	0	0	0	0	0	NA	0	0	0	NA	0	0	NA	NA	0	0	0	NA	NA	0	0	0	0	0	1	0	NA	0	0	0	NA	NA	1	chr12	128245593	128245594	chr12:128245593-128245594	,	0	0
cg05682479	NA	0	0	0	0	0	NA	0	0	0	NA	0	0	NA	NA	1	0	0	NA	NA	0	0	0	0	0	1	0	NA	0	0	0	NA	NA	2	chr12	128364721	128364722	chr12:128364721-128364722	LINC00508, LINC02393,	0	1
cg07053177	NA	0	1	0	0	0	NA	0	0	0	NA	0	0	NA	NA	0	0	0	NA	NA	0	0	0	0	0	0	0	NA	0	0	0	NA	NA	1	chr12	128899814	128899815	chr12:128899814-128899815	TMEM132C,	0	0
cg18627442	NA	0	0	0	0	0	NA	0	0	0	NA	0	0	NA	NA	1	0	0	NA	NA	0	0	0	0	0	0	0	NA	0	0	0	NA	NA	1	chr12	128899917	128899918	chr12:128899917-128899918	TMEM132C,	0	0
cg01055386	NA	1	0	0	0	0	NA	0	0	0	NA	0	0	NA	NA	0	0	0	NA	NA	0	0	0	0	0	0	0	NA	0	0	0	NA	NA	1	chr12	128900228	128900229	chr12:128900228-128900229	TMEM132C,	0	0
cg11638921	NA	0	0	0	0	0	NA	0	0	0	NA	0	0	NA	NA	1	0	0	NA	NA	0	0	0	0	0	0	0	NA	0	0	0	NA	NA	1	chr12	130184740	130184741	chr12:130184740-130184741	TMEM132D,	0	0
cg20470734	NA	1	0	0	0	0	NA	0	0	0	NA	0	0	NA	NA	0	0	0	NA	NA	0	0	0	0	0	0	0	NA	0	0	0	NA	NA	1	chr12	130185016	130185017	chr12:130185016-130185017	TMEM132D,	0	0
cg25022271	NA	0	0	0	0	0	NA	0	0	0	NA	0	0	NA	NA	1	0	0	NA	NA	0	0	0	0	0	0	0	NA	0	0	0	NA	NA	1	chr12	130420604	130420605	chr12:130420604-130420605	,	1	0
cg18613344	NA	0	0	0	0	0	NA	0	0	0	NA	0	0	NA	NA	1	0	0	NA	NA	0	0	0	0	0	0	0	NA	0	0	0	NA	NA	1	chr12	130918557	130918558	chr12:130918557-130918558	RIMBP2,	0	0
cg11803101	NA	0	0	0	0	0	NA	0	0	0	NA	0	0	NA	NA	1	0	0	NA	NA	0	0	0	0	0	0	0	NA	0	0	0	NA	NA	1	chr12	130958790	130958791	chr12:130958790-130958791	RIMBP2,	0	0
cg09668951	NA	1	0	0	0	0	NA	0	0	0	NA	0	0	NA	NA	1	0	0	NA	NA	0	0	0	0	0	1	0	NA	0	0	0	NA	NA	3	chr12	131030185	131030186	chr12:131030185-131030186	,	0	0
cg05296099	NA	1	0	0	0	0	NA	0	0	0	NA	0	0	NA	NA	0	0	0	NA	NA	0	0	0	0	0	0	0	NA	0	0	0	NA	NA	1	chr12	131624473	131624474	chr12:131624473-131624474	ADGRD1,	0	0
cg03221366	NA	0	0	0	0	0	NA	0	0	0	NA	0	0	NA	NA	1	0	0	NA	NA	0	0	0	0	0	0	0	NA	0	0	1	NA	NA	2	chr12	131943548	131943549	chr12:131943548-131943549	,	0	0
cg19865523	NA	0	0	0	0	0	NA	0	0	0	NA	0	0	NA	NA	0	0	0	NA	NA	0	0	0	0	0	0	0	NA	1	0	0	NA	NA	1	chr12	132537749	132537750	chr12:132537749-132537750	EP400,	0	0
cg06937459	NA	0	0	0	0	0	NA	0	0	0	NA	0	0	NA	NA	0	0	0	NA	NA	0	0	0	0	0	0	0	NA	0	0	1	NA	NA	1	chr12	132653212	132653213	chr12:132653212-132653213	,	1	0
cg07640336	NA	1	0	0	0	0	NA	0	0	0	NA	0	0	NA	NA	0	0	0	NA	NA	0	0	0	0	0	0	0	NA	0	0	0	NA	NA	1	chr12	132677496	132677497	chr12:132677496-132677497	GALNT9, LINC02361,	1	1
cg15721142	NA	0	0	0	0	0	NA	0	0	0	NA	0	0	NA	NA	0	0	0	NA	NA	0	0	1	0	0	0	0	NA	0	0	0	NA	NA	1	chr12	133354410	133354411	chr12:133354410-133354411	GOLGA3,	0	0
cg15998961	NA	0	0	0	0	0	NA	0	0	0	NA	0	0	NA	NA	0	0	0	NA	NA	0	0	0	0	0	1	0	NA	0	0	0	NA	NA	1	chr12	133360718	133360719	chr12:133360718-133360719	GOLGA3,	0	0
cg27048388	NA	0	0	0	0	0	NA	0	0	0	NA	0	0	NA	NA	1	0	0	NA	NA	0	0	0	0	0	0	0	NA	0	0	0	NA	NA	1	chr13	22493776	22493777	chr13:22493776-22493777	,	0	0
cg11347708	NA	1	0	0	0	1	NA	0	0	0	NA	0	0	NA	NA	0	0	0	NA	NA	0	0	0	1	0	0	0	NA	0	0	0	NA	NA	3	chr13	24475833	24475834	chr13:24475833-24475834	C1QTNF9B,	1	1
cg24227837	NA	0	0	0	0	0	NA	0	0	0	NA	0	0	NA	NA	1	0	0	NA	NA	0	0	0	0	0	0	0	NA	0	0	0	NA	NA	1	chr13	26620952	26620953	chr13:26620952-26620953	SHISA2,	1	0
cg24289821	NA	0	0	0	0	1	NA	0	0	0	NA	0	0	NA	NA	0	0	0	NA	NA	0	0	0	1	0	0	0	NA	0	0	0	NA	NA	2	chr13	30054557	30054558	chr13:30054557-30054558	MTUS2, MTUS2-AS1,	0	1
cg12359739	NA	0	0	0	0	0	NA	0	0	0	NA	0	0	NA	NA	0	0	0	NA	NA	0	0	0	0	0	0	0	NA	0	0	1	NA	NA	1	chr13	31002471	31002472	chr13:31002471-31002472	,	0	0
cg22712883	NA	0	0	0	0	0	NA	0	0	0	NA	0	0	NA	NA	1	0	0	NA	NA	0	0	0	0	0	0	0	NA	0	0	0	NA	NA	1	chr13	31579374	31579375	chr13:31579374-31579375	,	0	0
cg08124923	NA	0	0	0	0	0	NA	0	0	0	NA	0	0	NA	NA	1	0	0	NA	NA	0	0	0	0	0	0	0	NA	0	0	0	NA	NA	1	chr13	36789908	36789909	chr13:36789908-36789909	CCDC169-SOHLH2,	0	0
cg25102872	NA	0	0	0	0	0	NA	0	0	0	NA	0	0	NA	NA	1	0	0	NA	NA	0	0	0	0	0	0	0	NA	0	0	0	NA	NA	1	chr13	64386291	64386292	chr13:64386291-64386292	,	0	0
cg06682556	NA	0	0	0	0	0	NA	0	0	0	NA	0	0	NA	NA	0	0	0	NA	NA	0	0	0	0	0	1	0	NA	0	0	0	NA	NA	1	chr13	65533139	65533140	chr13:65533139-65533140	,	0	0
cg24982402	NA	0	0	0	0	0	NA	0	0	0	NA	0	0	NA	NA	1	0	0	NA	NA	0	0	0	0	0	0	0	NA	0	0	0	NA	NA	1	chr13	91826906	91826907	chr13:91826906-91826907	LINC00379,	0	1
cg22274473	NA	0	0	0	0	0	NA	0	0	0	NA	0	0	NA	NA	0	0	0	NA	NA	0	0	0	0	0	1	0	NA	0	0	0	NA	NA	1	chr13	107687147	107687148	chr13:107687147-107687148	,	0	0
cg07886472	NA	1	0	0	0	0	NA	0	0	0	NA	0	0	NA	NA	1	0	0	NA	NA	0	1	0	0	0	0	0	NA	0	0	0	NA	NA	3	chr13	112054947	112054948	chr13:112054947-112054948	,	0	0
cg22617002	NA	0	0	0	0	0	NA	0	0	0	NA	0	0	NA	NA	0	0	0	NA	NA	0	0	0	0	0	0	0	NA	0	0	1	NA	NA	1	chr13	112275633	112275634	chr13:112275633-112275634	LINC02337,	0	1
cg05338434	NA	1	0	0	0	0	NA	0	0	0	NA	0	0	NA	NA	0	0	0	NA	NA	0	0	0	0	0	0	0	NA	0	0	0	NA	NA	1	chr13	112334317	112334318	chr13:112334317-112334318	,	1	0
cg02109189	NA	0	0	0	0	0	NA	0	0	0	NA	0	0	NA	NA	1	0	0	NA	NA	0	0	0	0	0	0	0	NA	0	0	0	NA	NA	1	chr13	112611279	112611280	chr13:112611279-112611280	,	0	0
cg19465159	NA	0	0	0	0	0	NA	0	0	0	NA	0	0	NA	NA	0	0	0	NA	NA	0	1	0	0	0	0	0	NA	0	0	0	NA	NA	1	chr13	112631672	112631673	chr13:112631672-112631673	LINC00403,	0	1
cg26068160	NA	1	0	0	0	0	NA	0	0	0	NA	0	0	NA	NA	0	0	0	NA	NA	0	0	0	0	0	0	0	NA	0	0	0	NA	NA	1	chr13	112895546	112895547	chr13:112895546-112895547	,	0	0
cg03797537	NA	1	0	0	0	0	NA	0	0	0	NA	0	0	NA	NA	0	0	0	NA	NA	0	0	0	0	0	0	0	NA	0	0	0	NA	NA	1	chr13	112899567	112899568	chr13:112899567-112899568	,	0	0
cg14074878	NA	0	0	0	0	0	NA	0	0	0	NA	0	0	NA	NA	0	0	0	NA	NA	0	0	0	0	0	1	0	NA	0	0	0	NA	NA	1	chr13	113696482	113696483	chr13:113696482-113696483	MCF2L,	0	0
cg23627248	NA	0	0	0	0	0	NA	0	0	0	NA	0	0	NA	NA	0	0	0	NA	NA	0	1	0	0	0	0	0	NA	0	0	0	NA	NA	1	chr13	114325720	114325721	chr13:114325720-114325721	GRK1,	0	0
cg07396904	NA	0	0	0	0	0	NA	0	0	0	NA	0	0	NA	NA	0	0	0	NA	NA	0	0	0	0	0	1	0	NA	0	0	0	NA	NA	1	chr14	22103504	22103505	chr14:22103504-22103505	OR10G2,	0	0
cg18585560	NA	0	0	0	0	0	NA	0	0	0	NA	0	0	NA	NA	0	0	0	NA	NA	0	0	1	0	0	0	0	NA	0	0	0	NA	NA	1	chr14	70236546	70236547	chr14:70236546-70236547	SRSF5,	0	0
cg13492164	NA	1	0	0	0	0	NA	0	0	0	NA	0	0	NA	NA	0	0	0	NA	NA	0	0	0	0	0	0	0	NA	0	0	0	NA	NA	1	chr14	78709782	78709783	chr14:78709782-78709783	NRXN3,	0	1
cg00763510	NA	0	0	0	0	0	NA	0	0	0	NA	0	0	NA	NA	0	0	0	NA	NA	0	0	0	0	0	1	0	NA	0	0	0	NA	NA	1	chr14	88602681	88602682	chr14:88602681-88602682	,	0	0
cg17200737	NA	0	0	0	0	0	NA	0	0	0	NA	0	0	NA	NA	0	0	0	NA	NA	0	1	0	0	0	0	0	NA	0	0	0	NA	NA	1	chr14	92198536	92198537	chr14:92198536-92198537	CATSPERB,	0	0
cg01801610	NA	0	0	0	0	0	NA	0	0	0	NA	0	0	NA	NA	1	0	0	NA	NA	0	0	0	0	0	0	0	NA	0	0	0	NA	NA	1	chr14	99101498	99101499	chr14:99101498-99101499	,	0	0
cg18085033	NA	0	0	0	0	0	NA	0	0	0	NA	0	0	NA	NA	0	0	0	NA	NA	0	1	0	0	0	0	0	NA	0	0	0	NA	NA	1	chr14	101198783	101198784	chr14:101198783-101198784	DLK1,	1	0
cg18893311	NA	0	0	0	0	0	NA	0	0	0	NA	0	0	NA	NA	0	0	0	NA	NA	0	0	0	0	0	1	0	NA	0	0	0	NA	NA	1	chr14	101201611	101201612	chr14:101201611-101201612	DLK1,	1	0
cg02675047	NA	1	0	0	0	1	NA	0	0	0	NA	0	0	NA	NA	1	0	0	NA	NA	0	0	0	1	0	0	0	NA	0	0	0	NA	NA	4	chr14	101393226	101393227	chr14:101393226-101393227	MEG8,	0	1
cg12820006	NA	1	0	0	0	0	NA	0	0	0	NA	0	0	NA	NA	0	0	0	NA	NA	0	0	0	0	0	1	0	NA	0	0	0	NA	NA	2	chr14	101491497	101491498	chr14:101491497-101491498	MIR1193, MIR1197, MIR299, MIR323A, MIR329-1, MIR329-2, MIR379, MIR380, MIR411, MIR494, MIR758,	0	1
cg24698352	NA	0	0	0	0	0	NA	0	0	0	NA	0	0	NA	NA	0	0	0	NA	NA	0	0	0	0	0	1	0	NA	0	0	0	NA	NA	1	chr14	101496342	101496343	chr14:101496342-101496343	MIR1193, MIR1197, MIR323A, MIR329-1, MIR329-2, MIR380, MIR494, MIR495, MIR543, MIR758,	0	1
cg02975060	NA	1	0	0	0	0	NA	0	0	0	NA	0	0	NA	NA	0	0	0	NA	NA	0	0	0	1	0	0	0	NA	0	0	1	NA	NA	3	chr14	101510016	101510017	chr14:101510016-101510017	MIR1185-1, MIR1185-2, MIR300, MIR376A1, MIR376A2, MIR376B, MIR376C, MIR381, MIR381HG, MIR487B, MIR539, MIR544A, MIR654, MIR889,	0	1
cg11887864	NA	0	0	0	0	0	NA	0	0	0	NA	0	0	NA	NA	0	0	0	NA	NA	0	0	0	0	0	1	0	NA	0	0	0	NA	NA	1	chr14	101510502	101510503	chr14:101510502-101510503	MIR1185-1, MIR1185-2, MIR300, MIR376A1, MIR376A2, MIR376B, MIR376C, MIR381, MIR381HG, MIR487B, MIR539, MIR544A, MIR654, MIR889,	0	1
cg03862290	NA	0	0	0	0	0	NA	0	0	0	NA	0	0	NA	NA	0	0	0	NA	NA	0	0	0	0	0	1	0	NA	0	0	0	NA	NA	1	chr14	101515739	101515740	chr14:101515739-101515740	MIR381HG,	0	1
cg06746453	NA	0	0	0	0	0	NA	0	0	0	NA	0	0	NA	NA	0	0	0	NA	NA	0	0	0	0	0	1	0	NA	0	0	0	NA	NA	1	chr14	101518815	101518816	chr14:101518815-101518816	MIR487A,	0	1
cg09291131	NA	1	0	0	0	0	NA	0	0	0	NA	0	0	NA	NA	0	0	0	NA	NA	0	0	0	0	0	0	0	NA	0	0	0	NA	NA	1	chr14	101521809	101521810	chr14:101521809-101521810	MIR485,	0	1
cg03153765	NA	0	0	0	0	0	NA	0	0	0	NA	0	0	NA	NA	0	0	0	NA	NA	0	0	0	0	0	1	0	NA	0	0	0	NA	NA	1	chr14	101522141	101522142	chr14:101522141-101522142	MIR134, MIR154, MIR323B, MIR381HG, MIR382, MIR485, MIR487A, MIR496, MIR668,	0	1
cg14543291	NA	0	0	0	0	0	NA	0	0	0	NA	0	0	NA	NA	0	0	0	NA	NA	0	1	0	0	0	0	0	NA	0	0	0	NA	NA	1	chr14	104618788	104618789	chr14:104618788-104618789	KIF26A,	0	0
cg01612220	NA	0	0	0	0	0	NA	0	0	0	NA	0	0	NA	NA	1	0	0	NA	NA	0	0	0	0	0	0	0	NA	0	0	1	NA	NA	2	chr14	104621176	104621177	chr14:104621176-104621177	KIF26A,	0	0
cg11792470	NA	1	0	0	0	0	NA	0	0	0	NA	0	0	NA	NA	0	0	1	NA	NA	0	0	0	0	0	0	0	NA	0	0	1	NA	NA	3	chr14	104630673	104630674	chr14:104630673-104630674	KIF26A,	0	0
cg01933329	NA	0	0	0	0	0	NA	0	0	0	NA	0	0	NA	NA	0	0	0	NA	NA	0	0	0	0	0	0	0	NA	0	0	1	NA	NA	1	chr14	104639768	104639769	chr14:104639768-104639769	KIF26A,	0	0
cg01061980	NA	0	0	0	0	0	NA	0	0	0	NA	0	0	NA	NA	0	0	0	NA	NA	0	0	0	0	0	0	0	NA	0	0	1	NA	NA	1	chr14	104854940	104854941	chr14:104854940-104854941	,	0	0
cg13819319	NA	0	0	0	0	0	NA	0	0	0	NA	0	0	NA	NA	1	0	0	NA	NA	0	0	0	0	0	0	0	NA	0	0	0	NA	NA	1	chr14	104917395	104917396	chr14:104917395-104917396	,	0	0
cg23871248	NA	0	0	0	0	0	NA	0	0	0	NA	0	0	NA	NA	0	0	0	NA	NA	0	0	0	0	0	0	0	NA	0	0	1	NA	NA	1	chr14	106066668	106066669	chr14:106066668-106066669	,	0	0
cg10915099	NA	0	0	0	0	0	NA	0	0	0	NA	0	0	NA	NA	0	0	0	NA	NA	0	0	0	0	0	0	0	NA	0	0	1	NA	NA	1	chr14	106188396	106188397	chr14:106188396-106188397	,	0	0
cg13651690	NA	1	0	0	0	0	NA	0	0	0	NA	0	0	NA	NA	0	0	0	NA	NA	0	0	0	0	0	0	0	NA	0	0	0	NA	NA	1	chr14	106320748	106320749	chr14:106320748-106320749	MIR4507, MIR4537, MIR4538,	0	1
cg13805262	NA	0	0	0	0	0	NA	0	0	0	NA	0	0	NA	NA	1	0	0	NA	NA	0	0	0	0	0	0	0	NA	0	0	0	NA	NA	1	chr14	106436701	106436702	chr14:106436701-106436702	ADAM6,	0	1
cg11206824	NA	0	0	0	0	0	NA	0	0	0	NA	0	0	NA	NA	0	0	0	NA	NA	0	0	0	0	0	1	0	NA	0	0	0	NA	NA	1	chr15	25443938	25443939	chr15:25443938-25443939	SNHG14,	0	1
cg13130934	NA	0	0	0	0	0	NA	0	0	0	NA	0	0	NA	NA	0	0	0	NA	NA	0	0	0	0	0	1	0	NA	0	0	0	NA	NA	1	chr15	25449922	25449923	chr15:25449922-25449923	SNHG14,	0	1
cg00501006	NA	0	0	0	0	0	NA	0	0	0	NA	0	0	NA	NA	0	0	0	NA	NA	0	0	0	0	0	1	0	NA	0	0	0	NA	NA	1	chr15	25480975	25480976	chr15:25480975-25480976	SNHG14,	0	1
cg18915009	NA	0	0	0	0	0	NA	0	0	0	NA	0	0	NA	NA	0	0	0	NA	NA	0	0	0	0	0	1	0	NA	0	0	0	NA	NA	1	chr15	25514969	25514970	chr15:25514969-25514970	SNHG14, SNORD115-48,	0	1
cg07100560	NA	0	0	0	0	0	NA	0	0	0	NA	0	0	NA	NA	1	0	0	NA	NA	0	0	0	0	0	0	0	NA	0	0	0	NA	NA	1	chr15	25953514	25953515	chr15:25953514-25953515	ATP10A,	0	0
cg11015241	NA	0	0	0	0	0	NA	0	0	0	NA	0	0	NA	NA	1	0	0	NA	NA	0	0	0	0	0	0	0	NA	0	0	0	NA	NA	1	chr15	26026249	26026250	chr15:26026249-26026250	ATP10A,	0	0
cg21470503	NA	0	0	0	0	0	NA	0	0	1	NA	0	0	NA	NA	0	0	0	NA	NA	0	0	0	0	0	0	0	NA	0	0	0	NA	NA	1	chr15	29410245	29410246	chr15:29410245-29410246	APBA2,	0	0
cg01671642	NA	0	0	0	0	0	NA	0	0	0	NA	0	0	NA	NA	0	0	0	NA	NA	0	0	0	0	0	0	0	NA	0	0	1	NA	NA	1	chr15	50838805	50838806	chr15:50838805-50838806	USP50,	0	0
cg26155739	NA	0	0	0	0	0	NA	0	0	0	NA	0	0	NA	NA	0	0	0	NA	NA	0	0	0	0	0	0	0	NA	0	0	1	NA	NA	1	chr15	64674891	64674892	chr15:64674891-64674892	PCLAF,	0	1
cg17366808	NA	0	0	0	0	0	NA	0	0	0	NA	0	0	NA	NA	1	0	0	NA	NA	0	0	0	0	0	0	0	NA	0	0	0	NA	NA	1	chr15	73735476	73735477	chr15:73735476-73735477	REC114,	0	0
cg23384406	NA	0	0	0	0	0	NA	0	0	0	NA	0	0	NA	NA	1	0	0	NA	NA	0	0	0	0	0	0	0	NA	0	0	0	NA	NA	1	chr15	83360963	83360964	chr15:83360963-83360964	AP3B2, CPEB1-AS1,	0	1
cg13291225	NA	0	0	0	0	0	NA	0	0	0	NA	0	0	NA	NA	1	0	0	NA	NA	0	0	0	0	0	0	0	NA	0	0	0	NA	NA	1	chr15	93968270	93968271	chr15:93968270-93968271	,	0	0
cg26155032	NA	1	0	0	0	0	NA	0	0	0	NA	0	0	NA	NA	0	0	0	NA	NA	0	0	0	0	0	0	0	NA	0	0	0	NA	NA	1	chr15	97319937	97319938	chr15:97319937-97319938	SPATA8-AS1,	0	1
cg27134049	NA	0	0	0	0	0	NA	0	0	0	NA	0	0	NA	NA	1	0	0	NA	NA	0	0	0	0	0	0	0	NA	0	0	0	NA	NA	1	chr15	102357814	102357815	chr15:102357814-102357815	OR4F15,	0	0
cg26645225	NA	0	0	0	0	0	NA	0	0	0	NA	0	0	NA	NA	0	0	0	NA	NA	0	0	0	0	0	0	0	NA	0	0	1	NA	NA	1	chr16	893800	893801	chr16:893800-893801	,	1	0
cg00306728	NA	0	0	0	0	0	NA	0	0	0	NA	0	0	NA	NA	0	0	0	NA	NA	0	0	0	0	0	0	0	NA	0	0	1	NA	NA	1	chr16	1248836	1248837	chr16:1248836-1248837	CACNA1H,	0	0
cg03560850	NA	0	0	0	0	0	NA	0	0	0	NA	0	0	NA	NA	0	0	0	NA	NA	0	0	0	0	0	0	0	NA	0	0	1	NA	NA	1	chr16	1265557	1265558	chr16:1265557-1265558	CACNA1H,	0	0
cg08776331	NA	0	0	0	0	0	NA	0	0	0	NA	0	0	NA	NA	0	0	0	NA	NA	0	1	0	0	0	0	0	NA	0	0	0	NA	NA	1	chr16	2125989	2125990	chr16:2125989-2125990	TSC2,	0	0
cg10324810	NA	0	0	0	0	0	NA	0	0	0	NA	0	0	NA	NA	0	0	0	NA	NA	0	0	0	1	0	0	0	NA	0	0	0	NA	NA	1	chr16	2762695	2762696	chr16:2762695-2762696	PRSS27,	0	0
cg00499781	NA	0	0	0	0	0	NA	0	0	0	NA	0	0	NA	NA	1	0	0	NA	NA	0	0	0	0	0	0	0	NA	0	0	0	NA	NA	1	chr16	7568364	7568365	chr16:7568364-7568365	RBFOX1,	0	0
cg27449328	NA	0	0	0	0	0	NA	0	0	0	NA	0	0	NA	NA	0	0	0	NA	NA	0	0	0	0	0	1	0	NA	0	0	0	NA	NA	1	chr16	7615540	7615541	chr16:7615540-7615541	RBFOX1,	0	0
cg06829391	NA	0	0	0	0	0	NA	0	0	0	NA	0	0	NA	NA	0	0	0	NA	NA	0	0	0	0	0	1	0	NA	0	0	0	NA	NA	1	chr16	9857151	9857152	chr16:9857151-9857152	GRIN2A,	0	0
cg05160554	NA	0	0	0	0	0	NA	0	0	0	NA	0	0	NA	NA	0	0	0	NA	NA	0	0	0	0	0	1	0	NA	0	0	0	NA	NA	1	chr16	19468264	19468265	chr16:19468264-19468265	TMC5,	0	0
cg07246873	NA	0	0	0	0	0	NA	0	0	0	NA	0	0	NA	NA	0	0	0	NA	NA	0	0	0	0	0	1	0	NA	0	0	0	NA	NA	1	chr16	20702422	20702423	chr16:20702422-20702423	ACSM1,	0	1
cg07873449	NA	0	0	0	0	0	NA	0	0	0	NA	0	0	NA	NA	0	0	0	NA	NA	0	0	0	0	0	1	0	NA	0	0	0	NA	NA	1	chr16	24372719	24372720	chr16:24372719-24372720	CACNG3,	0	0
cg27410383	NA	1	0	0	0	0	NA	0	0	0	NA	0	0	NA	NA	0	0	0	NA	NA	0	0	0	0	0	0	0	NA	0	0	0	NA	NA	1	chr16	29179329	29179330	chr16:29179329-29179330	,	0	0
cg06612122	NA	0	0	0	0	0	NA	0	0	0	NA	0	0	NA	NA	1	0	0	NA	NA	0	0	0	0	0	0	0	NA	0	0	0	NA	NA	1	chr16	59788951	59788952	chr16:59788951-59788952	APOOP5,	0	1
cg27353957	NA	0	0	0	0	0	NA	0	0	0	NA	0	0	NA	NA	0	0	0	NA	NA	0	0	0	0	0	1	0	NA	0	0	0	NA	NA	1	chr16	78055642	78055643	chr16:78055642-78055643	CLEC3A,	0	0
cg01856023	NA	0	0	0	0	0	NA	0	0	0	NA	0	0	NA	NA	0	0	0	NA	NA	0	1	0	0	0	0	0	NA	0	0	0	NA	NA	1	chr16	81969883	81969884	chr16:81969883-81969884	PLCG2,	0	0
cg02431851	NA	0	0	0	0	0	NA	0	0	0	NA	0	0	NA	NA	0	0	0	NA	NA	0	1	0	0	0	0	0	NA	0	0	0	NA	NA	1	chr16	85543698	85543699	chr16:85543698-85543699	,	0	0
cg07851269	NA	0	0	0	0	0	NA	0	0	0	NA	1	0	NA	NA	0	0	0	NA	NA	0	0	0	0	0	0	0	NA	0	0	0	NA	NA	1	chr16	86740986	86740987	chr16:86740986-86740987	,	0	0
cg01973164	NA	0	0	0	0	0	NA	0	0	0	NA	0	0	NA	NA	0	0	0	NA	NA	0	0	0	0	0	1	0	NA	0	0	0	NA	NA	1	chr16	89972593	89972594	chr16:89972593-89972594	TCF25,	0	0
cg11794735	NA	0	0	0	0	0	NA	0	0	0	NA	0	0	NA	NA	0	0	0	NA	NA	0	1	0	0	0	0	0	NA	0	0	0	NA	NA	1	chr17	146404	146405	chr17:146404-146405	RPH3AL,	0	0
cg12102682	NA	0	0	0	0	0	NA	0	0	0	NA	0	0	NA	NA	0	0	0	NA	NA	0	0	0	0	0	0	0	NA	0	0	1	NA	NA	1	chr17	1123836	1123837	chr17:1123836-1123837	ABR,	0	0
cg18433109	NA	0	0	0	0	0	NA	0	0	0	NA	0	0	NA	NA	0	0	0	NA	NA	0	1	0	0	0	0	0	NA	0	0	0	NA	NA	1	chr17	1801772	1801773	chr17:1801772-1801773	RPA1,	0	0
cg20615517	NA	0	0	0	0	0	NA	0	0	0	NA	0	0	NA	NA	0	0	0	NA	NA	0	0	0	0	0	1	0	NA	0	0	0	NA	NA	1	chr17	3213559	3213560	chr17:3213559-3213560	OR3A4P,	0	1
cg18409838	NA	0	0	0	0	0	NA	0	0	0	NA	0	0	NA	NA	0	0	0	NA	NA	0	1	0	0	0	0	0	NA	0	0	0	NA	NA	1	chr17	4475157	4475158	chr17:4475157-4475158	,	0	0
cg20811564	NA	0	0	0	0	0	NA	0	0	0	NA	0	0	NA	NA	0	0	0	NA	NA	0	0	0	0	0	1	0	NA	0	0	0	NA	NA	1	chr17	11556567	11556568	chr17:11556567-11556568	DNAH9,	0	0
cg12235260	NA	0	0	0	0	0	NA	0	0	0	NA	0	0	NA	NA	0	0	0	NA	NA	0	0	0	1	0	0	0	NA	0	0	0	NA	NA	1	chr17	48845052	48845053	chr17:48845052-48845053	LINC00483, MIR8059,	0	1
cg13375248	NA	0	0	0	0	0	NA	0	0	0	NA	0	0	NA	NA	0	0	0	NA	NA	0	1	0	0	0	0	0	NA	0	0	0	NA	NA	1	chr17	48911181	48911182	chr17:48911181-48911182	WFIKKN2,	0	0
cg05474864	NA	0	0	0	0	0	NA	0	0	0	NA	0	0	NA	NA	0	0	0	NA	NA	0	1	0	0	0	0	0	NA	0	0	0	NA	NA	1	chr17	61518551	61518552	chr17:61518551-61518552	CYB561,	0	0
cg18432768	NA	0	0	0	0	0	NA	0	0	0	NA	0	0	NA	NA	1	0	0	NA	NA	0	0	0	0	0	0	0	NA	0	0	0	NA	NA	1	chr17	68100565	68100566	chr17:68100565-68100566	KCNJ16,	0	0
cg11310812	NA	1	0	0	0	0	NA	0	0	0	NA	0	0	NA	NA	0	0	0	NA	NA	0	0	0	0	0	0	0	NA	0	0	0	NA	NA	1	chr17	68128775	68128776	chr17:68128775-68128776	KCNJ16,	0	0
cg05338930	NA	0	0	0	0	0	NA	0	0	0	NA	0	0	NA	NA	1	0	0	NA	NA	0	0	0	0	0	0	0	NA	0	0	0	NA	NA	1	chr17	74928833	74928834	chr17:74928833-74928834	MGAT5B,	0	0
cg23225637	NA	0	0	0	0	0	NA	0	0	0	NA	0	0	NA	NA	0	0	0	NA	NA	0	0	1	0	0	0	0	NA	0	0	0	NA	NA	1	chr17	76989965	76989966	chr17:76989965-76989966	CANT1,	1	0
cg08857194	NA	0	0	0	0	0	NA	0	0	0	NA	0	0	NA	NA	0	0	0	NA	NA	0	1	0	0	0	0	0	NA	0	0	0	NA	NA	1	chr17	77078518	77078519	chr17:77078518-77078519	ENGASE,	0	0
cg26074051	NA	0	0	0	0	0	NA	0	0	0	NA	0	0	NA	NA	0	0	0	NA	NA	0	1	0	0	0	0	0	NA	0	0	0	NA	NA	1	chr17	79827169	79827170	chr17:79827169-79827170	ARHGDIA,	0	1
cg12503656	NA	0	0	0	0	0	NA	0	0	0	NA	0	0	NA	NA	0	0	0	NA	NA	0	1	0	0	0	0	0	NA	0	0	0	NA	NA	1	chr17	80208091	80208092	chr17:80208091-80208092	CSNK1D,	0	1
cg16919456	NA	1	0	0	0	0	NA	0	0	0	NA	0	0	NA	NA	0	0	0	NA	NA	0	0	0	1	0	0	0	NA	0	0	0	NA	NA	2	chr18	6929790	6929791	chr18:6929790-6929791	LINC00668,	0	1
cg06303224	NA	0	0	0	0	1	NA	0	0	0	NA	0	0	NA	NA	0	0	0	NA	NA	0	0	0	0	0	0	0	NA	0	0	0	NA	NA	1	chr18	6930087	6930088	chr18:6930087-6930088	LINC00668,	0	1
cg22369607	NA	1	0	0	0	0	NA	0	0	0	NA	0	0	NA	NA	0	0	0	NA	NA	0	0	0	0	0	0	0	NA	0	0	0	NA	NA	1	chr18	13821885	13821886	chr18:13821885-13821886	MC5R,	1	0
cg24445674	NA	1	0	0	0	0	NA	0	0	0	NA	0	0	NA	NA	0	0	0	NA	NA	0	0	0	0	0	0	0	NA	0	0	0	NA	NA	1	chr18	19998926	19998927	chr18:19998926-19998927	CTAGE1,	0	0
cg23553867	NA	0	0	0	0	0	NA	0	0	0	NA	0	0	NA	NA	0	0	0	NA	NA	0	0	0	0	0	0	0	NA	0	0	1	NA	NA	1	chr18	74325812	74325813	chr18:74325812-74325813	,	0	0
cg25816268	NA	0	0	0	0	0	NA	0	0	0	NA	0	0	NA	NA	1	0	0	NA	NA	0	0	0	0	0	0	0	NA	0	0	0	NA	NA	1	chr18	75690855	75690856	chr18:75690855-75690856	LINC01029,	0	1
cg16859165	NA	0	0	0	0	0	NA	0	0	0	NA	0	0	NA	NA	1	0	0	NA	NA	0	0	0	0	0	0	0	NA	0	0	0	NA	NA	1	chr18	76601647	76601648	chr18:76601647-76601648	,	0	0
cg24134504	NA	1	0	0	0	0	NA	0	0	0	NA	0	0	NA	NA	1	0	0	NA	NA	0	0	1	0	0	0	0	NA	0	0	0	NA	NA	3	chr18	76639479	76639480	chr18:76639479-76639480	,	0	0
cg13402195	NA	0	0	0	0	0	NA	0	0	0	NA	0	0	NA	NA	1	0	0	NA	NA	0	0	0	0	0	0	0	NA	0	0	0	NA	NA	1	chr18	76782766	76782767	chr18:76782766-76782767	,	0	0
cg02714192	NA	0	0	0	0	0	NA	0	0	0	NA	0	0	NA	NA	0	0	0	NA	NA	0	1	0	0	0	0	0	NA	0	0	0	NA	NA	1	chr18	77201972	77201973	chr18:77201972-77201973	NFATC1,	0	0
cg08157446	NA	0	0	0	0	0	NA	0	0	0	NA	0	0	NA	NA	0	0	0	NA	NA	0	1	0	0	0	0	0	NA	0	0	0	NA	NA	1	chr18	77215491	77215492	chr18:77215491-77215492	NFATC1,	0	0
cg02133098	NA	0	0	0	0	0	NA	0	0	0	NA	0	0	NA	NA	0	0	0	NA	NA	0	0	0	0	0	0	0	NA	0	0	1	NA	NA	1	chr19	407880	407881	chr19:407880-407881	C2CD4C,	1	0
cg03724628	NA	0	0	0	0	0	NA	0	0	0	NA	0	0	NA	NA	0	0	0	NA	NA	0	0	1	0	0	0	0	NA	0	0	0	NA	NA	1	chr19	1440260	1440261	chr19:1440260-1440261	RPS15,	0	0
cg10161194	NA	0	0	0	0	0	NA	0	0	0	NA	0	0	NA	NA	0	0	0	NA	NA	0	0	1	0	0	0	0	NA	0	0	0	NA	NA	1	chr19	3983180	3983181	chr19:3983180-3983181	EEF2, MIR1268A,	0	1
cg06915470	NA	0	0	0	0	0	NA	1	0	0	NA	0	0	NA	NA	0	0	0	NA	NA	0	0	0	1	0	0	0	NA	0	0	1	NA	NA	3	chr19	4555999	4556000	chr19:4555999-4556000	SEMA6B,	0	0
cg25655324	NA	0	0	0	0	1	NA	0	0	0	NA	0	0	NA	NA	0	0	0	NA	NA	0	0	0	0	0	0	0	NA	0	0	0	NA	NA	1	chr19	4556011	4556012	chr19:4556011-4556012	SEMA6B,	0	0
cg16191088	NA	0	0	0	0	0	NA	0	0	0	NA	0	0	NA	NA	0	0	0	NA	NA	0	0	0	0	0	0	0	NA	0	0	1	NA	NA	1	chr19	8654389	8654390	chr19:8654389-8654390	ADAMTS10,	1	0
cg21798669	NA	1	0	0	0	0	NA	0	0	0	NA	0	0	NA	NA	0	0	0	NA	NA	0	0	0	0	0	0	0	NA	0	0	0	NA	NA	1	chr19	8669959	8669960	chr19:8669959-8669960	ADAMTS10,	0	0
cg26308280	NA	0	0	0	0	0	NA	0	0	0	NA	0	0	NA	NA	1	0	0	NA	NA	0	0	0	0	0	1	0	NA	0	0	0	NA	NA	2	chr19	8952004	8952005	chr19:8952004-8952005	MBD3L1,	0	0
cg05222216	NA	0	0	0	0	0	NA	0	0	0	NA	0	0	NA	NA	0	0	0	NA	NA	0	0	0	0	0	1	0	NA	0	0	0	NA	NA	1	chr19	9093098	9093099	chr19:9093098-9093099	MUC16,	0	0
cg00007326	NA	0	0	0	0	0	NA	0	0	0	NA	0	0	NA	NA	0	0	0	NA	NA	0	0	0	0	0	0	0	NA	0	0	1	NA	NA	1	chr19	13366046	13366047	chr19:13366046-13366047	CACNA1A,	0	0
cg21222178	NA	0	0	0	0	0	NA	0	0	0	NA	0	0	NA	NA	0	0	1	NA	NA	0	0	0	0	0	0	0	NA	0	0	1	NA	NA	2	chr19	17759409	17759410	chr19:17759409-17759410	UNC13A,	0	0
cg24396973	NA	0	0	0	0	0	NA	0	0	0	NA	0	0	NA	NA	1	0	0	NA	NA	0	0	0	0	0	0	0	NA	0	0	0	NA	NA	1	chr19	38976392	38976393	chr19:38976392-38976393	RYR1,	0	0
cg22509205	NA	0	0	0	0	0	NA	0	0	0	NA	0	0	NA	NA	0	0	0	NA	NA	0	1	0	0	0	0	0	NA	0	0	0	NA	NA	1	chr19	40441611	40441612	chr19:40441611-40441612	FCGBP,	0	0
cg07297178	NA	0	0	0	0	0	NA	0	0	0	NA	0	0	NA	NA	0	0	0	NA	NA	0	0	0	0	0	1	0	NA	0	0	0	NA	NA	1	chr19	42193084	42193085	chr19:42193084-42193085	CEACAM7,	0	0
cg12981270	NA	1	0	0	0	0	NA	0	0	0	NA	0	0	NA	NA	0	0	0	NA	NA	0	0	0	0	0	0	0	NA	0	0	0	NA	NA	1	chr19	42509946	42509947	chr19:42509946-42509947	GRIK5,	0	0
cg01121180	NA	0	0	0	0	0	NA	0	0	0	NA	0	0	NA	NA	0	0	0	NA	NA	0	1	0	0	0	0	0	NA	0	0	0	NA	NA	1	chr19	51302454	51302455	chr19:51302454-51302455	C19orf48,	0	0
cg15651204	NA	1	0	0	0	0	NA	0	0	0	NA	0	0	NA	NA	0	0	0	NA	NA	0	0	0	0	0	0	0	NA	0	0	0	NA	NA	1	chr19	51535339	51535340	chr19:51535339-51535340	KLK12,	0	0
cg18710710	NA	0	0	0	0	0	NA	0	0	0	NA	0	0	NA	NA	0	0	0	NA	NA	0	0	0	0	0	1	0	NA	0	0	0	NA	NA	1	chr19	54192892	54192893	chr19:54192892-54192893	MIR1283-1, MIR515-1, MIR515-2, MIR519C, MIR520A, MIR526B,	0	1
cg08188609	NA	0	0	0	0	0	NA	0	0	0	NA	0	0	NA	NA	1	0	0	NA	NA	0	0	0	0	0	1	0	NA	0	0	0	NA	NA	2	chr19	54219504	54219505	chr19:54219504-54219505	MIR517A, MIR517B, MIR519D, MIR520D, MIR521-2,	0	1
cg03807917	NA	0	0	0	0	0	NA	0	0	0	NA	0	0	NA	NA	0	0	0	NA	NA	0	0	0	0	0	1	0	NA	0	0	0	NA	NA	1	chr19	54224533	54224534	chr19:54224533-54224534	MIR516B2, MIR517B, MIR520D, MIR520G, MIR521-2,	0	1
cg27099991	NA	0	0	0	0	0	NA	0	0	0	NA	0	0	NA	NA	1	0	0	NA	NA	0	0	0	0	0	0	0	NA	0	0	0	NA	NA	1	chr19	55494710	55494711	chr19:55494710-55494711	NLRP2,	0	1
cg07821737	NA	0	0	0	0	0	NA	0	0	0	NA	0	0	NA	NA	0	0	0	NA	NA	0	0	0	0	0	1	0	NA	0	0	0	NA	NA	1	chr19	56249743	56249744	chr19:56249743-56249744	NLRP9,	0	0
cg00751958	NA	0	0	0	0	0	NA	0	0	0	NA	0	0	NA	NA	1	0	0	NA	NA	0	0	0	0	0	0	0	NA	0	0	0	NA	NA	1	chr19	56459103	56459104	chr19:56459103-56459104	NLRP8,	0	0
cg25401594	NA	1	0	0	0	0	NA	0	0	0	NA	0	0	NA	NA	0	0	1	NA	NA	0	0	0	0	0	1	0	NA	0	0	0	NA	NA	3	chr19	57323858	57323859	chr19:57323858-57323859	PEG3, PEG3-AS1, ZIM2,	0	1
cg21124476	NA	0	0	0	0	0	NA	0	0	0	NA	0	0	NA	NA	1	0	0	NA	NA	0	0	0	0	0	1	0	NA	0	0	0	NA	NA	2	chr2	466990	466991	chr2:466990-466991	,	1	0
cg06417878	NA	0	0	0	0	0	NA	0	0	0	NA	0	0	NA	NA	1	0	0	NA	NA	0	0	0	0	0	1	0	NA	0	0	0	NA	NA	2	chr2	497417	497418	chr2:497417-497418	LINC01874,	0	1
cg16354775	NA	0	0	0	0	0	NA	0	0	0	NA	0	0	NA	NA	1	0	0	NA	NA	0	0	0	0	0	1	0	NA	0	0	0	NA	NA	2	chr2	503776	503777	chr2:503776-503777	,	1	0
cg07684460	NA	0	0	0	0	0	NA	0	0	0	NA	0	0	NA	NA	0	0	0	NA	NA	0	0	0	0	0	1	0	NA	0	0	0	NA	NA	1	chr2	522386	522387	chr2:522386-522387	,	0	0
cg05932184	NA	0	0	0	0	0	NA	0	0	0	NA	0	0	NA	NA	1	0	0	NA	NA	0	0	0	0	0	0	0	NA	0	0	0	NA	NA	1	chr2	582544	582545	chr2:582544-582545	,	0	0
cg12544663	NA	0	0	0	0	0	NA	0	0	0	NA	0	0	NA	NA	1	0	0	NA	NA	0	0	0	0	0	0	0	NA	0	0	1	NA	NA	2	chr2	720852	720853	chr2:720852-720853	,	0	0
cg04682087	NA	0	0	0	0	0	NA	0	0	0	NA	0	0	NA	NA	1	0	0	NA	NA	0	0	0	0	0	0	0	NA	0	0	0	NA	NA	1	chr2	875946	875947	chr2:875946-875947	,	1	0
cg12649374	NA	0	0	0	0	0	NA	0	0	0	NA	0	0	NA	NA	1	0	0	NA	NA	0	0	0	0	0	1	0	NA	0	0	0	NA	NA	2	chr2	911318	911319	chr2:911318-911319	,	0	0
cg02096296	NA	1	0	0	0	0	NA	0	0	0	NA	0	0	NA	NA	1	0	0	NA	NA	0	0	0	0	0	1	0	NA	0	0	0	NA	NA	3	chr2	1018046	1018047	chr2:1018046-1018047	SNTG2,	0	0
cg25421716	NA	0	0	0	0	0	NA	0	0	0	NA	0	0	NA	NA	1	0	0	NA	NA	0	0	0	0	0	1	0	NA	0	0	0	NA	NA	2	chr2	1203448	1203449	chr2:1203448-1203449	SNTG2,	0	0
cg09462763	NA	0	0	0	0	0	NA	0	0	0	NA	0	0	NA	NA	1	0	0	NA	NA	0	0	0	0	0	1	0	NA	0	0	0	NA	NA	2	chr2	1237694	1237695	chr2:1237694-1237695	SNTG2,	0	0
cg20594671	NA	0	0	0	0	0	NA	0	0	0	NA	0	0	NA	NA	1	0	0	NA	NA	0	0	0	0	0	0	0	NA	0	0	0	NA	NA	1	chr2	1276824	1276825	chr2:1276824-1276825	SNTG2,	0	0
cg11901695	NA	0	0	0	0	0	NA	0	0	0	NA	0	0	NA	NA	1	0	0	NA	NA	0	0	0	0	0	0	0	NA	0	0	0	NA	NA	1	chr2	1291450	1291451	chr2:1291450-1291451	SNTG2,	0	0
cg01445411	NA	0	0	0	0	0	NA	0	0	0	NA	0	0	NA	NA	1	0	0	NA	NA	0	0	0	0	0	1	0	NA	0	0	0	NA	NA	2	chr2	1358684	1358685	chr2:1358684-1358685	SNTG2,	0	0
cg10531568	NA	0	0	0	0	0	NA	0	0	0	NA	0	0	NA	NA	1	0	0	NA	NA	0	0	0	0	0	0	0	NA	0	0	0	NA	NA	1	chr2	1426068	1426069	chr2:1426068-1426069	TPO,	0	0
cg14935163	NA	0	0	0	0	0	NA	0	0	0	NA	0	0	NA	NA	1	0	0	NA	NA	0	0	0	0	0	0	0	NA	0	0	0	NA	NA	1	chr2	1488638	1488639	chr2:1488638-1488639	TPO,	0	0
cg12279175	NA	0	0	0	0	0	NA	0	0	0	NA	0	0	NA	NA	1	0	0	NA	NA	0	0	0	0	0	0	0	NA	0	0	0	NA	NA	1	chr2	1614207	1614208	chr2:1614207-1614208	,	0	0
cg09446465	NA	1	0	0	0	0	NA	0	0	0	NA	0	0	NA	NA	0	0	0	NA	NA	0	0	0	0	0	0	0	NA	0	0	0	NA	NA	1	chr2	1842860	1842861	chr2:1842860-1842861	MYT1L,	0	0
cg10256733	NA	1	0	0	0	0	NA	0	0	0	NA	0	0	NA	NA	1	0	0	NA	NA	0	0	0	0	0	1	0	NA	0	0	0	NA	NA	3	chr2	1879874	1879875	chr2:1879874-1879875	MYT1L,	0	0
cg14328535	NA	0	0	0	0	0	NA	0	0	0	NA	0	0	NA	NA	0	0	0	NA	NA	0	0	0	0	0	0	0	NA	0	0	1	NA	NA	1	chr2	1891067	1891068	chr2:1891067-1891068	MYT1L,	0	0
cg02966841	NA	0	0	0	0	0	NA	0	0	0	NA	0	0	NA	NA	1	0	0	NA	NA	0	0	0	0	0	1	0	NA	0	0	0	NA	NA	2	chr2	1926366	1926367	chr2:1926366-1926367	MYT1L,	0	0
cg17918270	NA	0	0	0	0	0	NA	0	0	0	NA	0	0	NA	NA	0	0	0	NA	NA	0	0	0	0	0	1	0	NA	0	0	0	NA	NA	1	chr2	1983484	1983485	chr2:1983484-1983485	MYT1L,	0	0
cg15225844	NA	1	0	0	0	0	NA	0	0	0	NA	0	0	NA	NA	1	0	0	NA	NA	0	0	0	0	0	0	0	NA	0	0	0	NA	NA	2	chr2	2189201	2189202	chr2:2189201-2189202	MYT1L,	0	0
cg22683010	NA	0	0	0	0	0	NA	0	0	0	NA	0	0	NA	NA	0	0	0	NA	NA	0	0	0	0	0	1	0	NA	0	0	0	NA	NA	1	chr2	2570283	2570284	chr2:2570283-2570284	,	0	0
cg24984629	NA	0	0	0	0	0	NA	0	0	0	NA	0	0	NA	NA	1	0	0	NA	NA	0	0	0	0	0	0	0	NA	0	0	0	NA	NA	1	chr2	2732533	2732534	chr2:2732533-2732534	,	0	0
cg08440178	NA	0	0	0	0	0	NA	0	0	0	NA	0	0	NA	NA	1	0	0	NA	NA	0	0	0	0	0	0	0	NA	0	0	0	NA	NA	1	chr2	2737278	2737279	chr2:2737278-2737279	,	0	0
cg24779831	NA	0	0	0	0	0	NA	0	0	0	NA	0	0	NA	NA	1	0	0	NA	NA	0	0	0	0	0	0	0	NA	0	0	0	NA	NA	1	chr2	2799370	2799371	chr2:2799370-2799371	,	0	0
cg04521724	NA	0	0	0	0	0	NA	0	0	0	NA	0	0	NA	NA	1	0	0	NA	NA	0	0	0	0	0	0	0	NA	0	0	0	NA	NA	1	chr2	2875964	2875965	chr2:2875964-2875965	,	0	0
cg13485248	NA	1	0	0	0	0	NA	0	0	0	NA	0	0	NA	NA	1	0	0	NA	NA	0	1	0	0	0	1	0	NA	0	0	0	NA	NA	4	chr2	2893732	2893733	chr2:2893732-2893733	,	0	0
cg06144418	NA	1	0	0	0	0	NA	0	0	0	NA	0	0	NA	NA	0	0	0	NA	NA	0	0	0	0	0	0	0	NA	0	0	0	NA	NA	1	chr2	3888390	3888391	chr2:3888390-3888391	DCDC2C,	0	0
cg24215159	NA	1	0	0	0	0	NA	0	0	0	NA	0	0	NA	NA	0	0	1	NA	NA	0	0	0	0	0	0	0	NA	0	0	0	NA	NA	2	chr2	4050695	4050696	chr2:4050695-4050696	,	0	0
cg19006220	NA	0	0	0	0	0	NA	0	0	1	NA	0	0	NA	NA	1	0	0	NA	NA	0	0	0	0	0	1	0	NA	0	0	0	NA	NA	3	chr2	4050719	4050720	chr2:4050719-4050720	,	0	0
cg22322870	NA	0	0	0	0	0	NA	0	0	0	NA	0	0	NA	NA	1	0	0	NA	NA	0	0	0	0	0	1	0	NA	0	0	0	NA	NA	2	chr2	4184127	4184128	chr2:4184127-4184128	,	0	0
cg22853943	NA	0	0	0	0	0	NA	0	0	0	NA	0	0	NA	NA	1	0	0	NA	NA	0	0	0	0	0	0	0	NA	0	0	0	NA	NA	1	chr2	4703822	4703823	chr2:4703822-4703823	LINC01249,	0	1
cg25801636	NA	0	0	0	0	0	NA	0	0	0	NA	0	0	NA	NA	1	0	0	NA	NA	0	0	0	0	0	1	0	NA	0	0	0	NA	NA	2	chr2	5584547	5584548	chr2:5584547-5584548	,	0	0
cg00704227	NA	0	0	0	0	0	NA	0	0	0	NA	0	0	NA	NA	1	0	0	NA	NA	0	0	0	0	0	0	0	NA	0	0	0	NA	NA	1	chr2	6635687	6635688	chr2:6635687-6635688	,	0	0
cg14353278	NA	0	0	0	0	0	NA	0	0	1	NA	0	0	NA	NA	0	0	0	NA	NA	0	0	0	0	0	0	0	NA	0	0	0	NA	NA	1	chr2	21229231	21229232	chr2:21229231-21229232	APOB,	0	0
cg12393275	NA	1	0	0	0	0	NA	0	0	0	NA	0	0	NA	NA	0	0	0	NA	NA	0	0	0	0	0	0	0	NA	0	0	0	NA	NA	1	chr2	79312224	79312225	chr2:79312224-79312225	REG1B,	0	0
cg11856334	NA	0	0	0	0	0	NA	0	0	0	NA	0	0	NA	NA	1	0	0	NA	NA	0	0	0	0	0	0	0	NA	0	0	0	NA	NA	1	chr2	81422363	81422364	chr2:81422363-81422364	,	0	0
cg00183606	NA	1	0	0	0	0	NA	0	0	0	NA	0	0	NA	NA	0	0	0	NA	NA	0	0	0	0	0	0	0	NA	0	0	0	NA	NA	1	chr2	84517474	84517475	chr2:84517474-84517475	FUNDC2P2,	0	1
cg06682454	NA	0	0	0	0	0	NA	0	0	0	NA	0	0	NA	NA	0	0	0	NA	NA	0	0	0	0	0	0	0	NA	1	0	0	NA	NA	1	chr2	98409392	98409393	chr2:98409392-98409393	TMEM131,	0	0
cg18845236	NA	0	0	0	0	0	NA	0	0	0	NA	0	0	NA	NA	0	0	0	NA	NA	0	0	0	1	0	0	0	NA	0	0	0	NA	NA	1	chr2	101009928	101009929	chr2:101009928-101009929	CHST10,	0	0
cg26759925	NA	0	0	0	0	0	NA	0	1	0	NA	0	0	NA	NA	0	0	0	NA	NA	0	0	0	0	0	0	0	NA	0	0	0	NA	NA	1	chr2	113736044	113736045	chr2:113736044-113736045	IL36G,	0	0
cg02431964	NA	0	0	0	0	0	NA	0	0	0	NA	0	0	NA	NA	0	0	0	NA	NA	0	0	0	0	0	1	0	NA	0	0	0	NA	NA	1	chr2	119700029	119700030	chr2:119700029-119700030	MARCO,	0	0
cg02141726	NA	0	0	0	0	0	NA	0	0	0	NA	0	0	NA	NA	1	0	0	NA	NA	0	0	0	0	0	0	0	NA	0	0	0	NA	NA	1	chr2	129493678	129493679	chr2:129493678-129493679	,	1	0
cg19486175	NA	0	0	0	0	0	NA	0	0	0	NA	0	0	NA	NA	0	0	0	NA	NA	0	0	0	0	0	1	0	NA	0	0	0	NA	NA	1	chr2	129657517	129657518	chr2:129657517-129657518	,	0	0
cg07310849	NA	1	0	0	0	0	NA	0	0	0	NA	0	0	NA	NA	0	0	0	NA	NA	0	0	0	0	0	0	0	NA	0	0	1	NA	NA	2	chr2	130512158	130512159	chr2:130512158-130512159	,	0	0
cg16654216	NA	0	0	0	0	0	NA	0	0	0	NA	0	0	NA	NA	0	0	0	NA	NA	0	1	0	0	0	0	0	NA	0	0	0	NA	NA	1	chr2	200423078	200423079	chr2:200423078-200423079	,	0	0
cg11770920	NA	0	0	0	0	0	NA	0	0	0	NA	0	0	NA	NA	1	0	0	NA	NA	0	0	0	0	0	0	0	NA	0	0	0	NA	NA	1	chr2	218465695	218465696	chr2:218465695-218465696	DIRC3,	0	1
cg06392126	NA	0	0	0	0	0	NA	0	0	0	NA	0	0	NA	NA	1	0	0	NA	NA	0	0	0	0	0	0	0	NA	0	0	0	NA	NA	1	chr2	228882353	228882354	chr2:228882353-228882354	SPHKAP,	0	0
cg17804911	NA	0	0	0	0	0	NA	0	0	0	NA	0	0	NA	NA	0	0	0	NA	NA	0	0	0	0	0	1	0	NA	0	0	0	NA	NA	1	chr2	229890602	229890603	chr2:229890602-229890603	PID1,	0	0
cg17725364	NA	0	0	0	0	0	NA	0	0	0	NA	0	0	NA	NA	1	0	0	NA	NA	0	0	0	0	0	0	0	NA	0	0	0	NA	NA	1	chr2	238280514	238280515	chr2:238280514-238280515	COL6A3,	0	0
cg02968760	NA	0	0	0	0	0	NA	0	0	0	NA	0	0	NA	NA	0	0	0	NA	NA	0	1	0	0	0	0	0	NA	0	0	0	NA	NA	1	chr2	242648761	242648762	chr2:242648761-242648762	ING5,	0	0
cg19384073	NA	0	0	0	0	0	NA	0	0	0	NA	0	0	NA	NA	0	0	0	NA	NA	0	0	0	0	0	0	0	NA	0	0	1	NA	NA	1	chr2	242766412	242766413	chr2:242766412-242766413	,	0	0
cg09319815	NA	1	0	0	0	0	NA	0	0	0	NA	0	0	NA	NA	0	0	0	NA	NA	0	0	0	1	0	0	0	NA	0	0	0	NA	NA	2	chr2	242794941	242794942	chr2:242794941-242794942	PDCD1,	0	0
cg20206322	NA	0	0	0	0	0	NA	0	0	0	NA	0	0	NA	NA	1	0	0	NA	NA	0	0	0	0	0	0	0	NA	0	0	0	NA	NA	1	chr20	23732873	23732874	chr20:23732873-23732874	CST1,	1	0
cg01910481	NA	0	0	0	0	0	NA	0	0	0	NA	0	0	NA	NA	0	0	0	NA	NA	0	0	0	0	0	1	0	NA	0	0	0	NA	NA	1	chr20	31824068	31824069	chr20:31824068-31824069	BPIFA1,	1	0
cg06889272	NA	0	0	0	0	0	NA	0	0	0	NA	0	0	NA	NA	0	0	0	NA	NA	0	0	0	0	0	0	0	NA	1	0	0	NA	NA	1	chr20	35833202	35833203	chr20:35833202-35833203	RPN2,	0	0
cg01268752	NA	0	0	0	0	1	NA	0	0	0	NA	0	0	NA	NA	0	0	0	NA	NA	0	0	0	1	0	0	0	NA	0	0	0	NA	NA	2	chr20	43926551	43926552	chr20:43926551-43926552	MATN4,	0	0
cg21950459	NA	0	0	1	0	0	NA	0	0	0	NA	0	0	NA	NA	0	0	0	NA	NA	0	0	0	0	0	0	0	NA	0	0	0	NA	NA	1	chr20	58508076	58508077	chr20:58508076-58508077	SYCP2,	1	0
cg25209132	NA	1	1	0	0	0	NA	0	0	0	NA	0	0	NA	NA	1	0	0	NA	NA	0	0	0	0	0	0	0	NA	0	0	0	NA	NA	3	chr20	59969413	59969414	chr20:59969413-59969414	CDH4,	1	0
cg27218892	NA	0	0	0	0	0	NA	0	0	0	NA	0	0	NA	NA	1	0	0	NA	NA	0	0	0	0	0	0	0	NA	0	0	0	NA	NA	1	chr20	62038111	62038112	chr20:62038111-62038112	KCNQ2,	0	0
cg11354857	NA	1	0	0	0	0	NA	0	0	0	NA	0	0	NA	NA	1	0	0	NA	NA	0	0	0	0	0	0	0	NA	0	0	0	NA	NA	2	chr21	32128696	32128697	chr21:32128696-32128697	KRTAP21-1,	0	0
cg10191581	NA	0	0	0	0	0	NA	0	0	0	NA	0	0	NA	NA	1	0	0	NA	NA	0	0	0	0	0	0	0	NA	0	0	0	NA	NA	1	chr21	32255112	32255113	chr21:32255112-32255113	KRTAP11-1,	0	0
cg19331876	NA	0	0	0	0	0	NA	0	0	0	NA	0	0	NA	NA	0	0	0	NA	NA	0	0	0	0	0	1	0	NA	0	0	0	NA	NA	1	chr21	38574729	38574730	chr21:38574729-38574730	TTC3,	0	0
cg13966313	NA	0	0	0	0	0	NA	0	0	0	NA	0	0	NA	NA	0	0	0	NA	NA	0	0	0	0	0	1	0	NA	0	0	0	NA	NA	1	chr21	39628227	39628228	chr21:39628227-39628228	KCNJ15,	0	0
cg14743983	NA	1	0	0	0	0	NA	0	0	0	NA	0	0	NA	NA	0	0	0	NA	NA	0	0	0	0	0	0	0	NA	0	0	0	NA	NA	1	chr21	46102984	46102985	chr21:46102984-46102985	TSPEAR,	0	0
cg24725931	NA	0	0	0	0	0	NA	0	0	0	NA	0	0	NA	NA	1	0	0	NA	NA	0	0	0	0	0	0	0	NA	0	0	0	NA	NA	1	chr22	50006785	50006786	chr22:50006785-50006786	C22orf34,	0	1
cg20438207	NA	0	0	0	0	0	NA	0	0	0	NA	0	0	NA	NA	0	0	0	NA	NA	0	0	0	0	0	1	0	NA	0	0	0	NA	NA	1	chr3	3886242	3886243	chr3:3886242-3886243	LRRN1,	0	0
cg11630135	NA	0	0	0	0	0	NA	0	0	0	NA	0	0	NA	NA	0	0	0	NA	NA	0	0	0	1	0	0	0	NA	0	0	0	NA	NA	1	chr3	13679166	13679167	chr3:13679166-13679167	FBLN2,	0	0
cg01806088	NA	0	0	0	0	0	NA	0	0	0	NA	0	0	NA	NA	0	0	0	NA	NA	0	0	0	0	0	1	0	NA	0	0	0	NA	NA	1	chr3	26388027	26388028	chr3:26388027-26388028	,	0	0
cg05776787	NA	0	0	0	0	0	NA	0	0	0	NA	0	0	NA	NA	1	0	0	NA	NA	0	0	0	0	0	0	0	NA	0	0	0	NA	NA	1	chr3	38835276	38835277	chr3:38835276-38835277	SCN10A,	0	0
cg18781372	NA	0	0	0	0	0	NA	0	0	0	NA	0	0	NA	NA	1	0	0	NA	NA	0	0	0	0	0	1	0	NA	0	0	0	NA	NA	2	chr3	38937304	38937305	chr3:38937304-38937305	SCN11A,	0	0
cg09489743	NA	0	0	0	0	0	NA	0	0	0	NA	0	0	NA	NA	0	0	0	NA	NA	0	0	0	0	0	0	0	NA	0	0	1	NA	NA	1	chr3	41239648	41239649	chr3:41239648-41239649	CTNNB1,	0	0
cg17036744	NA	0	0	0	0	0	NA	0	0	0	NA	0	0	NA	NA	0	0	0	NA	NA	0	0	1	0	0	0	0	NA	0	0	0	NA	NA	1	chr3	56717720	56717721	chr3:56717720-56717721	FAM208A,	1	0
cg12775613	NA	0	0	0	0	0	NA	0	0	0	NA	0	0	NA	NA	0	0	0	NA	NA	0	1	0	0	0	0	0	NA	0	0	0	NA	NA	1	chr3	88040034	88040035	chr3:88040034-88040035	HTR1F,	0	0
cg01895333	NA	0	0	0	0	0	NA	1	0	0	NA	0	0	NA	NA	0	0	0	NA	NA	0	0	0	1	0	0	0	NA	0	0	0	NA	NA	2	chr3	109035405	109035406	chr3:109035405-109035406	DPPA2,	0	0
cg11759378	NA	0	0	0	0	0	NA	0	0	0	NA	0	0	NA	NA	0	0	1	NA	NA	0	0	0	0	0	0	0	NA	0	0	0	NA	NA	1	chr3	109035469	109035470	chr3:109035469-109035470	DPPA2,	0	0
cg04881457	NA	0	0	0	0	0	NA	0	0	0	NA	0	0	NA	NA	0	0	0	NA	NA	0	1	0	0	0	0	0	NA	0	0	0	NA	NA	1	chr3	111260202	111260203	chr3:111260202-111260203	CD96,	0	1
cg02914790	NA	0	0	0	0	0	NA	0	0	0	NA	0	0	NA	NA	0	0	0	NA	NA	0	1	0	0	0	0	0	NA	0	0	0	NA	NA	1	chr3	122605355	122605356	chr3:122605355-122605356	LINC02035,	0	1
cg18090577	NA	0	0	0	0	0	NA	0	0	0	NA	0	0	NA	NA	1	0	0	NA	NA	0	0	0	0	0	0	0	NA	0	0	0	NA	NA	1	chr3	130158438	130158439	chr3:130158438-130158439	COL6A5,	0	1
cg12297066	NA	0	0	0	0	0	NA	0	0	0	NA	0	0	NA	NA	0	0	0	NA	NA	0	0	0	1	0	0	0	NA	0	0	0	NA	NA	1	chr3	150238373	150238374	chr3:150238373-150238374	,	0	0
cg23081534	NA	1	0	0	0	1	NA	0	0	0	NA	0	0	NA	NA	0	0	0	NA	NA	0	0	0	1	0	0	0	NA	0	0	1	NA	NA	4	chr3	169540079	169540080	chr3:169540079-169540080	LRRIQ4,	0	0
cg16255307	NA	0	0	0	0	0	NA	0	0	0	NA	0	0	NA	NA	0	0	0	NA	NA	0	0	0	0	0	0	0	NA	0	0	1	NA	NA	1	chr3	185271383	185271384	chr3:185271383-185271384	LIPH,	0	0
cg23036949	NA	0	0	0	0	0	NA	0	0	0	NA	0	0	NA	NA	0	0	0	NA	NA	0	0	0	0	0	0	0	NA	0	0	1	NA	NA	1	chr3	185277779	185277780	chr3:185277779-185277780	,	0	0
cg24935655	NA	0	0	0	0	0	NA	0	0	0	NA	0	0	NA	NA	1	0	0	NA	NA	0	0	0	0	0	0	0	NA	0	0	0	NA	NA	1	chr3	193097750	193097751	chr3:193097750-193097751	ATP13A5,	0	0
cg02237540	NA	1	0	0	0	0	NA	0	0	0	NA	0	0	NA	NA	1	0	0	NA	NA	0	0	0	0	0	0	0	NA	0	0	1	NA	NA	3	chr4	619865	619866	chr4:619865-619866	PDE6B,	1	0
cg18123043	NA	0	0	0	0	0	NA	0	0	0	NA	0	0	NA	NA	0	0	0	NA	NA	0	0	0	0	0	0	0	NA	0	0	1	NA	NA	1	chr4	1022462	1022463	chr4:1022462-1022463	FGFRL1,	0	0
cg01530024	NA	0	0	0	0	0	NA	0	0	0	NA	0	0	NA	NA	1	0	0	NA	NA	0	0	0	0	0	0	0	NA	0	0	0	NA	NA	1	chr4	5458553	5458554	chr4:5458553-5458554	STK32B,	0	0
cg07635567	NA	0	0	0	0	0	NA	0	0	0	NA	0	0	NA	NA	0	0	0	NA	NA	0	0	0	0	0	1	0	NA	0	0	0	NA	NA	1	chr4	6037446	6037447	chr4:6037446-6037447	JAKMIP1,	0	0
cg13895771	NA	1	0	0	0	0	NA	0	0	0	NA	0	0	NA	NA	0	0	0	NA	NA	0	0	0	0	0	0	0	NA	0	0	0	NA	NA	1	chr4	6537220	6537221	chr4:6537220-6537221	PPP2R2C,	0	0
cg08906576	NA	0	0	0	0	0	NA	0	0	0	NA	0	0	NA	NA	0	0	0	NA	NA	0	1	0	0	0	0	0	NA	0	0	0	NA	NA	1	chr4	8368486	8368487	chr4:8368486-8368487	ACOX3,	0	0
cg25219728	NA	0	0	0	0	0	NA	0	0	0	NA	0	0	NA	NA	0	0	0	NA	NA	0	1	0	0	0	0	0	NA	0	0	0	NA	NA	1	chr4	75895858	75895859	chr4:75895858-75895859	PARM1,	0	0
cg26226487	NA	0	0	0	0	0	NA	0	0	0	NA	0	0	NA	NA	1	0	0	NA	NA	0	0	0	0	0	0	0	NA	0	0	0	NA	NA	1	chr4	80329486	80329487	chr4:80329486-80329487	GK2,	0	0
cg13131878	NA	0	0	0	0	0	NA	0	0	0	NA	0	0	NA	NA	1	0	0	NA	NA	0	0	0	0	0	0	0	NA	0	0	0	NA	NA	1	chr4	183714417	183714418	chr4:183714417-183714418	TENM3,	0	0
cg01104377	NA	0	0	0	0	0	NA	0	0	0	NA	0	0	NA	NA	0	0	0	NA	NA	0	1	0	0	0	0	0	NA	0	0	0	NA	NA	1	chr4	184937961	184937962	chr4:184937961-184937962	STOX2,	0	1
cg08391380	NA	0	0	0	0	0	NA	0	0	0	NA	0	0	NA	NA	0	0	0	NA	NA	0	0	0	1	0	0	0	NA	0	0	1	NA	NA	2	chr5	601208	601209	chr5:601208-601209	LOC100996325,	1	1
cg02371401	NA	0	0	0	0	0	NA	0	0	0	NA	0	0	NA	NA	0	0	0	NA	NA	0	0	0	0	0	0	0	NA	0	0	1	NA	NA	1	chr5	676784	676785	chr5:676784-676785	TPPP,	1	0
cg06999799	NA	1	0	0	0	0	NA	0	0	0	NA	0	0	NA	NA	0	0	0	NA	NA	0	0	0	0	0	0	0	NA	0	0	0	NA	NA	1	chr5	1177305	1177306	chr5:1177305-1177306	CTD-3080P12.3,	0	1
cg09900986	NA	0	0	0	0	0	NA	0	0	0	NA	0	0	NA	NA	0	0	0	NA	NA	0	0	0	0	0	0	0	NA	0	0	1	NA	NA	1	chr5	1193802	1193803	chr5:1193802-1193803	,	0	0
cg02830714	NA	1	0	0	0	0	NA	0	0	0	NA	0	0	NA	NA	0	0	0	NA	NA	0	0	0	0	0	0	0	NA	0	0	0	NA	NA	1	chr5	1232545	1232546	chr5:1232545-1232546	SLC6A18,	0	0
cg24178621	NA	1	0	0	0	0	NA	0	0	0	NA	0	0	NA	NA	1	0	0	NA	NA	0	0	0	0	0	0	0	NA	0	0	0	NA	NA	2	chr5	1430526	1430527	chr5:1430526-1430527	SLC6A3,	1	0
cg07719674	NA	0	0	0	0	0	NA	0	0	0	NA	0	0	NA	NA	1	0	0	NA	NA	0	0	0	0	0	1	0	NA	0	0	0	NA	NA	2	chr5	1706317	1706318	chr5:1706317-1706318	MIR4277,	1	1
cg17244238	NA	0	0	0	0	0	NA	0	0	0	NA	0	0	NA	NA	1	0	0	NA	NA	0	0	0	0	0	0	0	NA	0	0	0	NA	NA	1	chr5	1728443	1728444	chr5:1728443-1728444	,	1	0
cg09825153	NA	0	0	0	0	0	NA	0	0	0	NA	0	0	NA	NA	0	0	0	NA	NA	0	1	0	0	0	0	0	NA	0	0	0	NA	NA	1	chr5	1826997	1826998	chr5:1826997-1826998	,	0	0
cg23948236	NA	0	0	0	0	0	NA	0	0	0	NA	0	0	NA	NA	1	0	0	NA	NA	0	0	0	0	0	0	0	NA	0	0	0	NA	NA	1	chr5	1839631	1839632	chr5:1839631-1839632	,	1	0
cg22514112	NA	0	0	0	0	0	NA	0	0	0	NA	0	0	NA	NA	1	0	0	NA	NA	0	0	0	0	0	0	0	NA	0	0	0	NA	NA	1	chr5	1859764	1859765	chr5:1859764-1859765	LINC02116,	1	1
cg18875975	NA	0	0	0	0	0	NA	0	0	0	NA	0	0	NA	NA	0	0	0	NA	NA	0	0	0	0	0	1	0	NA	0	0	0	NA	NA	1	chr5	2207176	2207177	chr5:2207176-2207177	,	0	0
cg01043336	NA	0	0	0	0	0	NA	0	0	0	NA	0	0	NA	NA	1	0	0	NA	NA	0	0	0	0	0	0	0	NA	0	0	0	NA	NA	1	chr5	2371956	2371957	chr5:2371956-2371957	,	0	0
cg05523057	NA	0	0	0	0	0	NA	0	0	0	NA	0	0	NA	NA	0	0	0	NA	NA	0	0	0	0	0	1	0	NA	0	0	0	NA	NA	1	chr5	2668571	2668572	chr5:2668571-2668572	,	0	0
cg23407804	NA	0	0	0	0	0	NA	0	0	0	NA	0	0	NA	NA	1	0	0	NA	NA	0	0	0	0	0	0	0	NA	0	0	0	NA	NA	1	chr5	2668829	2668830	chr5:2668829-2668830	,	0	0
cg13671900	NA	0	0	0	0	0	NA	0	0	0	NA	0	0	NA	NA	1	0	0	NA	NA	0	0	0	0	0	0	0	NA	0	0	0	NA	NA	1	chr5	3346810	3346811	chr5:3346810-3346811	,	0	0
cg19851481	NA	0	0	0	0	0	NA	0	0	0	NA	0	0	NA	NA	0	0	0	NA	NA	0	0	0	0	0	1	0	NA	0	0	0	NA	NA	1	chr5	3346821	3346822	chr5:3346821-3346822	,	0	0
cg06482220	NA	1	0	0	0	0	NA	0	0	0	NA	0	0	NA	NA	1	0	0	NA	NA	0	0	0	0	0	0	0	NA	0	0	0	NA	NA	2	chr5	3823385	3823386	chr5:3823385-3823386	,	0	0
cg06434454	NA	1	0	0	0	0	NA	0	0	0	NA	0	0	NA	NA	0	0	0	NA	NA	0	0	0	0	0	0	0	NA	0	0	0	NA	NA	1	chr5	5146320	5146321	chr5:5146320-5146321	ADAMTS16,	0	1
cg26874163	NA	1	0	0	0	0	NA	0	0	0	NA	0	0	NA	NA	0	0	0	NA	NA	0	0	0	0	0	0	0	NA	0	0	0	NA	NA	1	chr5	6337430	6337431	chr5:6337430-6337431	LINC02145,	0	1
cg21057643	NA	0	0	0	0	0	NA	0	0	0	NA	0	0	NA	NA	0	0	0	NA	NA	0	0	0	0	0	1	0	NA	0	0	0	NA	NA	1	chr5	6411758	6411759	chr5:6411758-6411759	,	0	0
cg04216310	NA	0	0	0	0	0	NA	0	0	0	NA	0	0	NA	NA	0	0	0	NA	NA	0	0	0	0	0	1	0	NA	0	0	0	NA	NA	1	chr5	10973693	10973694	chr5:10973693-10973694	CTNND2,	0	1
cg12912529	NA	0	0	0	0	0	NA	0	0	0	NA	0	0	NA	NA	0	0	0	NA	NA	0	0	0	0	0	1	0	NA	0	0	0	NA	NA	1	chr5	12794800	12794801	chr5:12794800-12794801	LINC01194,	0	1
cg07548982	NA	0	0	0	0	0	NA	0	0	0	NA	0	0	NA	NA	0	0	0	NA	NA	0	0	0	0	0	1	0	NA	0	0	0	NA	NA	1	chr5	13769939	13769940	chr5:13769939-13769940	DNAH5,	0	0
cg01860297	NA	0	0	0	0	0	NA	0	0	0	NA	0	0	NA	NA	1	0	0	NA	NA	0	0	0	0	0	0	0	NA	0	0	0	NA	NA	1	chr5	17275783	17275784	chr5:17275783-17275784	BASP1,	0	0
cg14788768	NA	0	0	0	0	0	NA	0	0	0	NA	0	0	NA	NA	0	0	0	NA	NA	0	0	0	0	0	1	0	NA	0	0	0	NA	NA	1	chr5	24170286	24170287	chr5:24170286-24170287	C5orf17,	0	1
cg02041108	NA	1	0	0	0	0	NA	0	0	0	NA	0	0	NA	NA	0	0	0	NA	NA	0	0	0	0	0	0	0	NA	0	0	0	NA	NA	1	chr5	35946185	35946186	chr5:35946185-35946186	,	0	0
cg25236382	NA	0	0	0	0	0	NA	0	0	0	NA	0	0	NA	NA	0	0	0	NA	NA	0	1	0	0	0	0	0	NA	0	0	0	NA	NA	1	chr5	93732017	93732018	chr5:93732017-93732018	KIAA0825,	0	0
cg21588562	NA	0	0	0	0	0	NA	0	0	0	NA	0	0	NA	NA	1	0	0	NA	NA	0	0	0	0	0	0	0	NA	0	0	0	NA	NA	1	chr5	121187589	121187590	chr5:121187589-121187590	FTMT,	0	0
cg10547893	NA	0	0	0	0	0	NA	0	0	0	NA	0	0	NA	NA	1	0	0	NA	NA	0	0	0	0	0	0	0	NA	0	0	0	NA	NA	1	chr5	130330948	130330949	chr5:130330948-130330949	,	0	0
cg07320595	NA	0	0	0	0	0	NA	0	0	0	NA	1	1	NA	NA	0	0	0	NA	NA	0	0	0	0	0	0	0	NA	0	0	0	NA	NA	2	chr5	156485233	156485234	chr5:156485233-156485234	HAVCR1,	0	0
cg14504291	NA	0	0	0	0	0	NA	0	0	0	NA	0	0	NA	NA	0	0	0	NA	NA	0	1	0	0	0	0	0	NA	0	0	0	NA	NA	1	chr5	168199864	168199865	chr5:168199864-168199865	SLIT3,	0	0
cg19755833	NA	0	0	0	0	0	NA	0	0	0	NA	0	0	NA	NA	0	0	0	NA	NA	0	1	0	0	0	0	0	NA	0	0	0	NA	NA	1	chr5	168272290	168272291	chr5:168272290-168272291	SLIT3,	1	0
cg06563640	NA	0	0	0	0	0	NA	0	0	0	NA	0	0	NA	NA	0	0	0	NA	NA	0	1	0	0	0	0	0	NA	0	0	0	NA	NA	1	chr5	171723358	171723359	chr5:171723358-171723359	LOC100288254,	0	1
cg20665464	NA	0	0	0	0	0	NA	0	0	0	NA	0	0	NA	NA	0	0	0	NA	NA	0	0	0	0	0	1	0	NA	0	0	0	NA	NA	1	chr6	224339	224340	chr6:224339-224340	,	0	0
cg01083223	NA	0	0	0	0	0	NA	0	0	0	NA	0	0	NA	NA	0	0	0	NA	NA	0	0	0	0	0	0	0	NA	0	0	1	NA	NA	1	chr6	387096	387097	chr6:387096-387097	IRF4,	1	1
cg01682157	NA	0	0	0	0	0	NA	0	0	0	NA	0	0	NA	NA	0	0	0	NA	NA	0	1	0	0	0	0	0	NA	0	0	0	NA	NA	1	chr6	1516643	1516644	chr6:1516643-1516644	,	1	0
cg09394681	NA	0	0	0	0	0	NA	0	0	0	NA	0	0	NA	NA	1	0	0	NA	NA	0	0	0	0	0	0	0	NA	0	0	0	NA	NA	1	chr6	4482990	4482991	chr6:4482990-4482991	,	0	0
cg03636964	NA	0	0	0	0	0	NA	0	0	0	NA	0	0	NA	NA	1	0	0	NA	NA	0	0	0	0	0	0	0	NA	0	0	0	NA	NA	1	chr6	19144166	19144167	chr6:19144166-19144167	LOC101928519,	0	1
cg15899461	NA	0	0	0	0	0	NA	0	0	0	NA	0	0	NA	NA	0	0	0	NA	NA	0	1	0	0	0	0	0	NA	0	0	0	NA	NA	1	chr6	28482667	28482668	chr6:28482667-28482668	GPX6,	0	0
cg03564455	NA	1	0	0	0	0	NA	0	0	0	NA	0	0	NA	NA	1	0	0	NA	NA	0	0	0	0	0	0	0	NA	0	0	0	NA	NA	2	chr6	29274096	29274097	chr6:29274096-29274097	OR14J1,	0	0
cg08862210	NA	0	0	0	0	0	NA	0	0	0	NA	0	0	NA	NA	0	0	0	NA	NA	0	0	0	0	0	0	0	NA	0	0	1	NA	NA	1	chr6	29364963	29364964	chr6:29364963-29364964	OR12D2,	0	0
cg15136600	NA	0	0	0	0	0	NA	0	0	0	NA	0	0	NA	NA	1	0	0	NA	NA	0	0	0	0	0	0	0	NA	0	0	0	NA	NA	1	chr6	29571468	29571469	chr6:29571468-29571469	GABBR1,	0	0
cg05846044	NA	0	0	0	0	1	NA	0	0	0	NA	0	0	NA	NA	0	0	0	NA	NA	0	0	0	1	0	0	0	NA	0	0	0	NA	NA	2	chr6	30080189	30080190	chr6:30080189-30080190	TRIM31, TRIM31-AS1,	1	1
cg26756125	NA	0	0	0	0	0	NA	0	0	0	NA	0	0	NA	NA	0	0	0	NA	NA	0	1	0	0	0	0	0	NA	0	0	0	NA	NA	1	chr6	31090270	31090271	chr6:31090270-31090271	PSORS1C1,	0	0
cg11637059	NA	0	0	0	0	0	NA	0	0	0	NA	0	0	NA	NA	0	0	0	NA	NA	0	1	0	0	0	0	0	NA	0	0	0	NA	NA	1	chr6	31833966	31833967	chr6:31833966-31833967	SLC44A4,	0	0
cg06351503	NA	0	0	0	0	0	NA	0	0	0	NA	0	0	NA	NA	0	0	0	NA	NA	0	1	0	0	0	0	0	NA	0	0	0	NA	NA	1	chr6	31928060	31928061	chr6:31928060-31928061	SKIV2L,	0	0
cg18321529	NA	0	0	0	0	0	NA	0	0	0	NA	0	0	NA	NA	0	0	0	NA	NA	0	1	0	0	0	0	0	NA	0	0	0	NA	NA	1	chr6	32056801	32056802	chr6:32056801-32056802	TNXB,	1	0
cg27631107	NA	0	0	0	0	0	NA	0	0	0	NA	0	0	NA	NA	0	0	0	NA	NA	0	1	0	0	0	0	0	NA	0	0	0	NA	NA	1	chr6	32123651	32123652	chr6:32123651-32123652	PPT2, PPT2-EGFL8,	1	1
cg01620077	NA	0	0	0	0	0	NA	0	0	0	NA	0	0	NA	NA	0	0	0	NA	NA	0	0	0	0	0	1	0	NA	0	0	0	NA	NA	1	chr6	49755009	49755010	chr6:49755009-49755010	PGK2,	0	0
cg05453816	NA	0	0	0	0	0	NA	0	0	0	NA	0	0	NA	NA	0	0	0	NA	NA	0	0	0	0	0	1	0	NA	0	0	0	NA	NA	1	chr6	84233939	84233940	chr6:84233939-84233940	PRSS35,	0	0
cg19757131	NA	0	0	0	0	0	NA	0	0	0	NA	0	0	NA	NA	1	0	0	NA	NA	0	0	0	0	0	0	0	NA	0	0	0	NA	NA	1	chr6	149286330	149286331	chr6:149286330-149286331	UST,	0	0
cg08590257	NA	0	0	0	0	0	NA	0	0	0	NA	0	0	NA	NA	0	0	0	NA	NA	0	1	0	0	0	0	0	NA	0	0	0	NA	NA	1	chr6	159796425	159796426	chr6:159796425-159796426	,	0	0
cg08784110	NA	0	0	0	0	0	NA	0	0	0	NA	0	0	NA	NA	0	0	0	NA	NA	0	1	0	0	0	0	0	NA	0	0	0	NA	NA	1	chr6	160328002	160328003	chr6:160328002-160328003	MAS1,	0	0
cg14006515	NA	0	0	0	0	0	NA	0	0	0	NA	0	0	NA	NA	1	0	0	NA	NA	0	0	0	0	0	0	0	NA	0	0	0	NA	NA	1	chr6	166140034	166140035	chr6:166140034-166140035	,	0	0
cg01259329	NA	1	0	0	0	0	NA	0	0	0	NA	0	0	NA	NA	0	0	0	NA	NA	0	0	0	0	0	0	0	NA	0	0	0	NA	NA	1	chr6	166944191	166944192	chr6:166944191-166944192	RPS6KA2,	0	0
cg12679792	NA	0	0	0	0	0	NA	0	0	0	NA	0	0	NA	NA	0	0	0	NA	NA	0	0	0	0	0	1	0	NA	0	0	0	NA	NA	1	chr6	168954578	168954579	chr6:168954578-168954579	SMOC2,	0	0
cg17923210	NA	0	0	0	0	0	NA	0	0	0	NA	0	0	NA	NA	0	0	0	NA	NA	0	0	0	0	0	1	0	NA	0	0	0	NA	NA	1	chr6	169129567	169129568	chr6:169129567-169129568	,	0	0
cg06244947	NA	0	0	0	0	0	NA	0	0	0	NA	0	0	NA	NA	1	0	0	NA	NA	0	0	0	0	0	0	0	NA	0	0	0	NA	NA	1	chr6	169540780	169540781	chr6:169540780-169540781	,	0	0
cg11251177	NA	0	0	0	0	0	NA	0	0	0	NA	0	0	NA	NA	1	0	0	NA	NA	0	0	0	0	0	0	0	NA	0	0	0	NA	NA	1	chr6	169569137	169569138	chr6:169569137-169569138	,	0	0
cg05024916	NA	0	0	0	0	0	NA	0	0	0	NA	0	0	NA	NA	0	0	0	NA	NA	0	0	0	0	0	0	0	NA	0	0	1	NA	NA	1	chr6	170531180	170531181	chr6:170531180-170531181	,	0	0
cg18847089	NA	0	0	0	0	0	NA	0	0	0	NA	0	0	NA	NA	0	0	1	NA	NA	0	0	0	0	0	0	0	NA	0	0	0	NA	NA	1	chr7	676060	676061	chr7:676060-676061	PRKAR1B,	0	0
cg11414017	NA	0	0	0	0	0	NA	0	0	0	NA	0	0	NA	NA	0	0	0	NA	NA	0	0	0	0	0	0	0	NA	0	0	1	NA	NA	1	chr7	1451205	1451206	chr7:1451205-1451206	,	1	0
cg07722840	NA	1	0	0	0	0	NA	0	0	0	NA	0	0	NA	NA	0	0	0	NA	NA	0	0	0	0	0	0	0	NA	0	0	1	NA	NA	2	chr7	1460880	1460881	chr7:1460880-1460881	,	0	0
cg08847944	NA	0	0	0	0	0	NA	0	0	0	NA	0	0	NA	NA	0	0	0	NA	NA	0	0	0	0	0	0	0	NA	0	0	1	NA	NA	1	chr7	1740190	1740191	chr7:1740190-1740191	,	1	0
cg13106306	NA	0	0	0	0	0	NA	0	0	0	NA	0	0	NA	NA	1	0	0	NA	NA	0	0	0	0	0	0	0	NA	0	0	0	NA	NA	1	chr7	2959105	2959106	chr7:2959105-2959106	CARD11,	0	0
cg19460453	NA	0	0	0	0	0	NA	0	0	0	NA	0	0	NA	NA	1	0	0	NA	NA	0	0	0	0	0	0	0	NA	0	0	0	NA	NA	1	chr7	3074405	3074406	chr7:3074405-3074406	CARD11,	0	0
cg21053935	NA	0	0	0	0	0	NA	0	0	0	NA	0	0	NA	NA	1	0	0	NA	NA	0	0	0	0	0	0	0	NA	0	0	0	NA	NA	1	chr7	4030038	4030039	chr7:4030038-4030039	SDK1,	0	0
cg22054364	NA	0	0	0	0	0	NA	0	0	0	NA	0	0	NA	NA	1	0	0	NA	NA	0	0	0	0	0	0	0	NA	0	0	0	NA	NA	1	chr7	4308739	4308740	chr7:4308739-4308740	SDK1,	0	0
cg07554986	NA	0	0	0	0	0	NA	0	0	0	NA	0	0	NA	NA	0	1	0	NA	NA	0	0	0	0	0	0	0	NA	0	0	0	NA	NA	1	chr7	4751906	4751907	chr7:4751906-4751907	FOXK1,	1	0
cg04594483	NA	0	0	0	0	0	NA	0	0	0	NA	0	0	NA	NA	0	0	0	NA	NA	0	0	0	0	0	0	0	NA	0	0	1	NA	NA	1	chr7	4862020	4862021	chr7:4862020-4862021	RADIL,	0	0
cg04385765	NA	0	0	0	0	0	NA	0	0	0	NA	0	0	NA	NA	0	0	0	NA	NA	0	0	0	0	0	0	0	NA	0	0	1	NA	NA	1	chr7	5122887	5122888	chr7:5122887-5122888	,	0	0
cg05101809	NA	0	0	0	0	0	NA	0	0	0	NA	0	0	NA	NA	0	0	0	NA	NA	0	0	0	1	0	0	0	NA	0	0	0	NA	NA	1	chr7	5338832	5338833	chr7:5338832-5338833	SLC29A4,	1	0
cg17230640	NA	0	0	0	0	1	NA	0	0	0	NA	0	0	NA	NA	0	0	0	NA	NA	0	0	0	1	0	0	0	NA	0	0	0	NA	NA	2	chr7	5342893	5342894	chr7:5342893-5342894	SLC29A4,	0	0
cg12965553	NA	0	0	0	0	0	NA	0	0	0	NA	0	0	NA	NA	0	0	0	NA	NA	0	0	1	0	0	0	0	NA	0	0	0	NA	NA	1	chr7	26403802	26403803	chr7:26403802-26403803	SNX10,	0	0
cg17837894	NA	0	0	0	0	0	NA	0	0	1	NA	0	0	NA	NA	0	0	0	NA	NA	0	0	0	0	0	0	0	NA	0	0	0	NA	NA	1	chr7	27531429	27531430	chr7:27531429-27531430	,	0	0
cg12570246	NA	1	0	0	0	0	NA	0	0	0	NA	0	0	NA	NA	0	0	0	NA	NA	0	0	0	0	0	0	0	NA	0	0	0	NA	NA	1	chr7	36959356	36959357	chr7:36959356-36959357	ELMO1,	0	1
cg27332053	NA	0	0	0	0	0	NA	0	0	0	NA	0	0	NA	NA	1	0	0	NA	NA	0	0	0	0	0	0	0	NA	0	0	0	NA	NA	1	chr7	42446175	42446176	chr7:42446175-42446176	,	0	0
cg09921682	NA	0	0	0	0	0	NA	0	0	0	NA	0	0	NA	NA	0	0	0	NA	NA	0	0	0	1	0	0	0	NA	0	0	0	NA	NA	1	chr7	50133131	50133132	chr7:50133131-50133132	C7orf72, ZPBP,	0	0
cg10791343	NA	0	0	0	0	0	NA	0	0	0	NA	0	0	NA	NA	1	0	0	NA	NA	0	0	0	0	0	0	0	NA	0	0	0	NA	NA	1	chr7	53103287	53103288	chr7:53103287-53103288	POM121L12,	0	0
cg14794023	NA	0	0	0	0	0	NA	0	0	0	NA	0	0	NA	NA	0	0	0	NA	NA	0	0	0	0	0	1	0	NA	0	0	0	NA	NA	1	chr7	53103576	53103577	chr7:53103576-53103577	POM121L12,	0	0
cg19907438	NA	0	0	0	0	0	NA	0	0	0	NA	0	0	NA	NA	1	0	0	NA	NA	0	0	0	0	0	1	0	NA	0	0	0	NA	NA	2	chr7	53255225	53255226	chr7:53255225-53255226	,	0	0
cg06548369	NA	0	0	0	0	0	NA	0	0	0	NA	0	0	NA	NA	0	0	0	NA	NA	0	0	0	0	0	1	0	NA	0	0	0	NA	NA	1	chr7	54142704	54142705	chr7:54142704-54142705	,	0	0
cg12509442	NA	0	0	0	0	0	NA	0	0	0	NA	0	0	NA	NA	0	0	0	NA	NA	0	0	0	0	0	1	0	NA	0	0	0	NA	NA	1	chr7	54636856	54636857	chr7:54636856-54636857	VSTM2A, VSTM2A-OT1,	0	1
cg21811549	NA	0	0	0	0	0	NA	0	0	0	NA	0	0	NA	NA	0	0	0	NA	NA	0	0	0	0	0	1	0	NA	0	0	0	NA	NA	1	chr7	63667594	63667595	chr7:63667594-63667595	ZNF735,	0	0
cg18964630	NA	0	0	0	0	0	NA	0	0	0	NA	0	0	NA	NA	1	0	0	NA	NA	0	0	0	0	0	0	0	NA	0	0	0	NA	NA	1	chr7	71913592	71913593	chr7:71913592-71913593	,	0	0
cg03644984	NA	0	0	0	0	0	NA	0	0	0	NA	0	0	NA	NA	1	0	0	NA	NA	0	0	0	0	0	0	0	NA	0	0	0	NA	NA	1	chr7	82286378	82286379	chr7:82286378-82286379	,	0	0
cg16177250	NA	0	0	0	0	0	NA	0	0	0	NA	0	0	NA	NA	1	0	0	NA	NA	0	0	0	0	0	0	0	NA	0	0	0	NA	NA	1	chr7	102087731	102087732	chr7:102087731-102087732	ORAI2,	0	0
cg16192029	NA	0	0	0	0	0	NA	0	0	0	NA	0	0	NA	NA	1	0	0	NA	NA	0	0	0	0	0	0	0	NA	0	0	0	NA	NA	1	chr7	117864674	117864675	chr7:117864674-117864675	ANKRD7,	0	0
cg01999908	NA	1	0	0	0	0	NA	0	0	0	NA	0	0	NA	NA	1	0	0	NA	NA	0	0	0	0	0	1	0	NA	0	0	0	NA	NA	3	chr7	127256920	127256921	chr7:127256920-127256921	PAX4,	1	0
cg21308760	NA	0	0	0	0	0	NA	0	0	0	NA	0	0	NA	NA	0	0	0	NA	NA	0	0	0	0	0	1	0	NA	0	0	0	NA	NA	1	chr7	141629801	141629802	chr7:141629801-141629802	CLEC5A,	0	0
cg08865560	NA	0	0	0	0	0	NA	0	0	0	NA	0	0	NA	NA	0	0	0	NA	NA	0	0	0	0	0	1	0	NA	0	0	0	NA	NA	1	chr7	142008312	142008313	chr7:142008312-142008313	,	0	0
cg17340556	NA	0	0	0	0	0	NA	0	0	0	NA	0	0	NA	NA	1	0	0	NA	NA	0	0	0	0	0	0	0	NA	0	0	0	NA	NA	1	chr7	142375308	142375309	chr7:142375308-142375309	MTRNR2L6,	0	0
cg12251828	NA	0	0	0	0	0	NA	0	0	0	NA	0	0	NA	NA	0	0	0	NA	NA	0	0	0	1	0	0	0	NA	0	0	0	NA	NA	1	chr7	142560197	142560198	chr7:142560197-142560198	EPHB6,	0	1
cg02351199	NA	0	0	0	0	0	NA	0	0	0	NA	0	0	NA	NA	0	0	0	NA	NA	0	0	0	0	0	1	0	NA	0	0	0	NA	NA	1	chr7	142724597	142724598	chr7:142724597-142724598	OR9A2,	0	0
cg23149825	NA	1	0	0	0	0	NA	0	0	0	NA	0	0	NA	NA	0	0	0	NA	NA	0	0	0	0	0	1	0	NA	0	0	0	NA	NA	2	chr7	145395722	145395723	chr7:145395722-145395723	,	0	0
cg02515354	NA	0	0	0	0	0	NA	0	0	0	NA	0	0	NA	NA	0	0	0	NA	NA	0	0	0	0	0	1	0	NA	0	0	0	NA	NA	1	chr7	147256123	147256124	chr7:147256123-147256124	CNTNAP2,	0	0
cg07299645	NA	0	0	0	0	0	NA	0	0	0	NA	0	0	NA	NA	1	0	0	NA	NA	0	0	0	0	0	0	0	NA	0	0	0	NA	NA	1	chr7	147256263	147256264	chr7:147256263-147256264	CNTNAP2,	0	0
cg17995495	NA	0	0	0	0	0	NA	0	0	0	NA	0	0	NA	NA	0	0	0	NA	NA	0	0	0	0	0	1	0	NA	0	0	0	NA	NA	1	chr7	150174507	150174508	chr7:150174507-150174508	GIMAP8,	0	0
cg15704358	NA	0	0	0	0	0	NA	0	0	0	NA	0	0	NA	NA	0	0	0	NA	NA	0	0	0	0	0	1	0	NA	0	0	0	NA	NA	1	chr7	150210980	150210981	chr7:150210980-150210981	GIMAP7,	0	0
cg24251111	NA	1	0	0	0	0	NA	0	0	0	NA	0	0	NA	NA	0	0	0	NA	NA	0	0	0	0	0	0	0	NA	0	0	0	NA	NA	1	chr7	151553819	151553820	chr7:151553819-151553820	PRKAG2,	0	0
cg18116285	NA	0	0	1	0	0	NA	1	0	1	NA	0	0	NA	NA	0	0	1	NA	NA	0	0	0	0	0	0	0	NA	0	0	1	NA	NA	5	chr7	155581411	155581412	chr7:155581411-155581412	,	1	0
cg24045038	NA	0	1	0	0	0	NA	0	0	0	NA	0	0	NA	NA	0	0	0	NA	NA	0	1	0	0	0	0	0	NA	0	0	0	NA	NA	2	chr7	155867845	155867846	chr7:155867845-155867846	,	0	0
cg24838949	NA	0	1	0	0	0	NA	0	0	0	NA	0	0	NA	NA	0	0	0	NA	NA	0	0	0	0	0	0	0	NA	0	0	0	NA	NA	1	chr7	155897436	155897437	chr7:155897436-155897437	,	0	0
cg22608082	NA	0	0	0	0	0	NA	0	0	0	NA	0	0	NA	NA	0	0	0	NA	NA	0	0	0	0	0	0	0	NA	0	0	1	NA	NA	1	chr7	156832864	156832865	chr7:156832864-156832865	,	1	0
cg11538176	NA	0	0	0	0	0	NA	0	0	0	NA	0	0	NA	NA	0	0	0	NA	NA	0	0	1	0	0	0	0	NA	0	0	0	NA	NA	1	chr7	157053075	157053076	chr7:157053075-157053076	UBE3C,	0	0
cg13858484	NA	0	0	0	0	0	NA	0	0	0	NA	0	0	NA	NA	0	0	0	NA	NA	0	1	0	0	0	0	0	NA	0	0	0	NA	NA	1	chr7	157162202	157162203	chr7:157162202-157162203	DNAJB6,	0	0
cg08572454	NA	0	0	0	0	0	NA	0	0	0	NA	0	0	NA	NA	1	0	0	NA	NA	0	0	0	0	0	0	0	NA	0	0	0	NA	NA	1	chr7	157341619	157341620	chr7:157341619-157341620	PTPRN2,	0	0
cg14051111	NA	0	0	0	0	0	NA	0	0	0	NA	0	0	NA	NA	0	0	0	NA	NA	0	0	0	0	0	0	0	NA	0	0	1	NA	NA	1	chr7	157345090	157345091	chr7:157345090-157345091	PTPRN2,	0	0
cg17527969	NA	0	0	0	0	0	NA	0	0	0	NA	0	0	NA	NA	0	0	0	NA	NA	0	0	0	0	0	1	0	NA	0	0	0	NA	NA	1	chr7	157367537	157367538	chr7:157367537-157367538	PTPRN2,	1	0
cg04605940	NA	0	0	0	0	0	NA	0	0	0	NA	0	0	NA	NA	0	0	0	NA	NA	0	0	0	0	0	1	0	NA	0	0	0	NA	NA	1	chr7	157391297	157391298	chr7:157391297-157391298	PTPRN2,	1	0
cg20899329	NA	0	0	0	0	0	NA	0	0	0	NA	0	0	NA	NA	1	0	0	NA	NA	0	0	0	0	0	0	0	NA	0	0	0	NA	NA	1	chr7	157410194	157410195	chr7:157410194-157410195	PTPRN2,	1	0
cg16433587	NA	0	0	0	0	0	NA	0	0	0	NA	0	0	NA	NA	0	0	0	NA	NA	0	0	0	0	0	1	0	NA	0	0	0	NA	NA	1	chr7	157434183	157434184	chr7:157434183-157434184	PTPRN2,	0	0
cg11380223	NA	1	0	0	0	0	NA	0	0	0	NA	0	0	NA	NA	0	0	0	NA	NA	0	0	0	0	0	0	0	NA	0	0	0	NA	NA	1	chr7	157447534	157447535	chr7:157447534-157447535	PTPRN2,	0	0
cg02478172	NA	1	0	0	0	0	NA	0	0	0	NA	0	0	NA	NA	1	0	0	NA	NA	0	0	0	0	0	0	0	NA	0	0	0	NA	NA	2	chr7	157468082	157468083	chr7:157468082-157468083	PTPRN2,	1	0
cg27611274	NA	0	0	0	0	0	NA	0	0	0	NA	0	0	NA	NA	1	0	0	NA	NA	0	0	0	0	0	0	0	NA	0	0	0	NA	NA	1	chr7	157512892	157512893	chr7:157512892-157512893	PTPRN2,	1	0
cg04670922	NA	0	0	0	0	0	NA	0	0	0	NA	0	0	NA	NA	0	0	0	NA	NA	0	0	0	0	0	1	0	NA	0	0	0	NA	NA	1	chr7	157527872	157527873	chr7:157527872-157527873	PTPRN2,	0	0
cg18843944	NA	0	0	0	0	0	NA	0	0	0	NA	0	0	NA	NA	1	0	0	NA	NA	0	0	0	0	0	0	0	NA	0	0	0	NA	NA	1	chr7	157544580	157544581	chr7:157544580-157544581	PTPRN2,	0	0
cg27143007	NA	1	0	0	0	0	NA	0	0	0	NA	0	0	NA	NA	0	0	0	NA	NA	0	0	0	0	0	0	0	NA	0	0	0	NA	NA	1	chr7	157568342	157568343	chr7:157568342-157568343	PTPRN2,	1	0
cg01239704	NA	0	0	0	0	0	NA	0	0	0	NA	0	0	NA	NA	1	0	0	NA	NA	0	0	0	0	0	0	0	NA	0	0	0	NA	NA	1	chr7	157605569	157605570	chr7:157605569-157605570	PTPRN2,	0	0
cg07491199	NA	0	0	0	0	0	NA	0	0	0	NA	0	0	NA	NA	0	0	0	NA	NA	0	0	0	0	0	1	0	NA	0	0	0	NA	NA	1	chr7	157643734	157643735	chr7:157643734-157643735	PTPRN2,	0	0
cg13071778	NA	0	0	0	0	0	NA	0	0	0	NA	0	0	NA	NA	1	0	0	NA	NA	0	0	0	0	0	0	0	NA	0	0	0	NA	NA	1	chr7	157730162	157730163	chr7:157730162-157730163	PTPRN2,	0	0
cg08414888	NA	0	0	0	0	0	NA	0	0	0	NA	0	0	NA	NA	1	0	0	NA	NA	0	0	0	0	0	1	0	NA	0	0	0	NA	NA	2	chr7	157738287	157738288	chr7:157738287-157738288	PTPRN2,	0	0
cg27104173	NA	1	0	0	0	0	NA	0	0	0	NA	0	0	NA	NA	1	0	0	NA	NA	0	0	0	0	0	0	0	NA	0	0	0	NA	NA	2	chr7	157744316	157744317	chr7:157744316-157744317	PTPRN2,	0	0
cg07306108	NA	0	0	0	0	0	NA	0	0	0	NA	0	0	NA	NA	1	0	0	NA	NA	0	0	0	0	0	0	0	NA	0	0	0	NA	NA	1	chr7	157834946	157834947	chr7:157834946-157834947	PTPRN2,	0	0
cg05439204	NA	1	0	0	0	0	NA	0	0	0	NA	0	0	NA	NA	0	0	0	NA	NA	0	0	0	0	0	0	0	NA	0	0	0	NA	NA	1	chr7	157854693	157854694	chr7:157854693-157854694	PTPRN2,	0	0
cg02470440	NA	0	0	0	0	0	NA	0	0	0	NA	0	0	NA	NA	1	0	0	NA	NA	0	0	0	0	0	0	0	NA	0	0	0	NA	NA	1	chr7	157854772	157854773	chr7:157854772-157854773	PTPRN2,	0	0
cg26170014	NA	0	0	0	0	0	NA	0	0	0	NA	0	0	NA	NA	1	0	0	NA	NA	0	0	0	0	0	1	0	NA	0	0	0	NA	NA	2	chr7	157868234	157868235	chr7:157868234-157868235	PTPRN2,	0	0
cg14743683	NA	0	0	0	0	0	NA	0	0	0	NA	0	0	NA	NA	1	0	0	NA	NA	0	0	0	0	0	0	0	NA	0	0	0	NA	NA	1	chr7	157872787	157872788	chr7:157872787-157872788	PTPRN2,	0	0
cg02773779	NA	0	0	0	0	0	NA	0	0	0	NA	0	0	NA	NA	0	0	0	NA	NA	0	0	0	0	0	1	0	NA	0	0	0	NA	NA	1	chr7	157873499	157873500	chr7:157873499-157873500	PTPRN2,	0	0
cg10769178	NA	0	0	0	0	0	NA	0	0	0	NA	0	0	NA	NA	0	0	0	NA	NA	0	0	0	0	0	1	0	NA	0	0	0	NA	NA	1	chr7	157876300	157876301	chr7:157876300-157876301	PTPRN2,	0	0
cg07879612	NA	0	0	0	0	0	NA	0	0	0	NA	0	0	NA	NA	0	0	0	NA	NA	0	0	0	0	0	0	0	NA	0	0	1	NA	NA	1	chr7	157891327	157891328	chr7:157891327-157891328	PTPRN2,	0	0
cg01718785	NA	0	0	0	0	0	NA	0	0	0	NA	0	0	NA	NA	1	0	0	NA	NA	0	0	0	0	0	0	0	NA	0	0	0	NA	NA	1	chr7	157916279	157916280	chr7:157916279-157916280	PTPRN2,	0	0
cg26967186	NA	0	0	0	0	0	NA	0	0	0	NA	0	0	NA	NA	1	0	0	NA	NA	0	0	0	0	0	0	0	NA	0	0	0	NA	NA	1	chr7	157919649	157919650	chr7:157919649-157919650	PTPRN2,	0	0
cg22795123	NA	0	0	0	0	0	NA	0	0	0	NA	0	0	NA	NA	1	0	0	NA	NA	0	0	0	0	0	1	0	NA	0	0	0	NA	NA	2	chr7	157932971	157932972	chr7:157932971-157932972	PTPRN2,	0	0
cg25120425	NA	1	0	0	0	0	NA	0	0	0	NA	0	0	NA	NA	0	0	0	NA	NA	0	0	0	0	0	0	0	NA	0	0	0	NA	NA	1	chr7	157933354	157933355	chr7:157933354-157933355	PTPRN2,	0	0
cg22791324	NA	0	0	0	0	0	NA	0	0	0	NA	0	0	NA	NA	1	0	0	NA	NA	0	0	0	0	0	0	0	NA	0	0	0	NA	NA	1	chr7	157949174	157949175	chr7:157949174-157949175	PTPRN2,	0	0
cg25354206	NA	0	0	0	0	0	NA	0	0	0	NA	0	0	NA	NA	1	0	0	NA	NA	0	0	0	0	0	0	0	NA	0	0	0	NA	NA	1	chr7	157958049	157958050	chr7:157958049-157958050	PTPRN2,	0	0
cg18889973	NA	1	0	0	0	0	NA	0	0	0	NA	0	0	NA	NA	0	0	1	NA	NA	0	0	0	0	0	0	0	NA	0	0	1	NA	NA	3	chr7	157958261	157958262	chr7:157958261-157958262	PTPRN2,	0	0
cg14632918	NA	0	0	0	0	0	NA	0	0	0	NA	0	0	NA	NA	0	0	0	NA	NA	0	0	0	0	0	1	0	NA	0	0	0	NA	NA	1	chr7	157958299	157958300	chr7:157958299-157958300	PTPRN2,	0	0
cg08246366	NA	1	0	0	0	0	NA	0	0	0	NA	0	0	NA	NA	1	0	0	NA	NA	0	0	0	0	0	0	0	NA	0	0	0	NA	NA	2	chr7	157985113	157985114	chr7:157985113-157985114	PTPRN2,	0	0
cg27014435	NA	1	0	0	0	0	NA	0	0	0	NA	0	0	NA	NA	0	0	0	NA	NA	0	0	0	0	0	0	0	NA	0	0	0	NA	NA	1	chr7	158093277	158093278	chr7:158093277-158093278	PTPRN2,	0	0
cg20797106	NA	0	0	0	0	0	NA	0	0	0	NA	0	0	NA	NA	0	0	0	NA	NA	0	0	0	0	0	1	0	NA	0	0	0	NA	NA	1	chr7	158113804	158113805	chr7:158113804-158113805	PTPRN2,	0	0
cg25045630	NA	0	0	0	0	0	NA	0	0	0	NA	0	0	NA	NA	0	0	0	NA	NA	0	0	0	0	0	1	0	NA	0	0	0	NA	NA	1	chr7	158216857	158216858	chr7:158216857-158216858	PTPRN2,	0	0
cg17646855	NA	0	0	0	0	0	NA	0	0	0	NA	0	0	NA	NA	1	0	0	NA	NA	0	0	0	0	0	0	0	NA	0	0	0	NA	NA	1	chr7	158267256	158267257	chr7:158267256-158267257	PTPRN2,	0	0
cg08546120	NA	0	0	0	0	0	NA	0	0	0	NA	0	0	NA	NA	0	0	0	NA	NA	0	0	0	0	0	1	0	NA	0	0	0	NA	NA	1	chr7	158336818	158336819	chr7:158336818-158336819	PTPRN2,	0	0
cg18159323	NA	1	0	0	0	0	NA	0	0	0	NA	0	0	NA	NA	0	0	0	NA	NA	0	0	0	0	0	0	0	NA	0	0	0	NA	NA	1	chr7	158349441	158349442	chr7:158349441-158349442	PTPRN2,	0	0
cg07130601	NA	0	0	0	0	0	NA	0	0	0	NA	0	0	NA	NA	0	0	0	NA	NA	0	0	0	0	0	0	0	NA	0	0	1	NA	NA	1	chr7	158766826	158766827	chr7:158766826-158766827	,	0	0
cg06515745	NA	0	0	0	0	0	NA	0	0	0	NA	0	0	NA	NA	0	0	0	NA	NA	0	0	0	0	0	0	0	NA	0	0	1	NA	NA	1	chr7	158792197	158792198	chr7:158792197-158792198	,	1	0
cg01290718	NA	0	0	0	0	0	NA	0	0	0	NA	0	0	NA	NA	1	0	0	NA	NA	0	0	0	0	0	1	0	NA	0	0	0	NA	NA	2	chr7	158858508	158858509	chr7:158858508-158858509	VIPR2,	0	1
cg04358516	NA	1	0	0	0	0	NA	0	0	0	NA	0	0	NA	NA	0	0	0	NA	NA	0	0	0	0	0	0	0	NA	0	0	0	NA	NA	1	chr7	158951193	158951194	chr7:158951193-158951194	,	0	0
cg21772735	NA	0	0	0	0	0	NA	0	0	0	NA	0	0	NA	NA	1	0	0	NA	NA	0	0	0	0	0	0	0	NA	0	0	0	NA	NA	1	chr8	849830	849831	chr8:849830-849831	DLGAP2,	1	1
cg18984833	NA	0	0	0	0	0	NA	0	0	0	NA	0	0	NA	NA	0	0	0	NA	NA	0	1	0	0	0	0	0	NA	0	0	0	NA	NA	1	chr8	855042	855043	chr8:855042-855043	DLGAP2,	1	1
cg07333231	NA	1	0	0	0	0	NA	0	0	0	NA	0	0	NA	NA	0	0	0	NA	NA	0	0	0	0	0	0	0	NA	0	0	0	NA	NA	1	chr8	1051728	1051729	chr8:1051728-1051729	DLGAP2,	0	1
cg08919372	NA	0	0	0	0	0	NA	0	0	0	NA	0	0	NA	NA	0	0	0	NA	NA	0	0	0	0	0	1	0	NA	0	0	0	NA	NA	1	chr8	1370327	1370328	chr8:1370327-1370328	DLGAP2,	0	0
cg10831196	NA	0	0	0	0	0	NA	0	0	0	NA	0	0	NA	NA	0	0	0	NA	NA	0	0	0	0	0	1	0	NA	0	0	0	NA	NA	1	chr8	1579039	1579040	chr8:1579039-1579040	DLGAP2,	0	0
cg04146801	NA	0	0	0	0	0	NA	0	0	0	NA	0	0	NA	NA	0	0	0	NA	NA	0	0	0	0	0	0	0	NA	0	0	1	NA	NA	1	chr8	2017571	2017572	chr8:2017571-2017572	MYOM2,	1	0
cg15239628	NA	0	0	0	0	0	NA	0	0	0	NA	0	0	NA	NA	0	0	0	NA	NA	0	0	0	0	0	1	0	NA	0	0	0	NA	NA	1	chr8	2538305	2538306	chr8:2538305-2538306	LOC101927815,	0	1
cg04640809	NA	0	0	0	0	0	NA	0	0	0	NA	0	0	NA	NA	0	0	0	NA	NA	0	0	0	0	0	1	0	NA	0	0	0	NA	NA	1	chr8	2752782	2752783	chr8:2752782-2752783	,	0	0
cg23345631	NA	0	0	0	0	0	NA	0	0	0	NA	0	0	NA	NA	0	0	0	NA	NA	0	0	0	0	0	1	0	NA	0	0	0	NA	NA	1	chr8	3244912	3244913	chr8:3244912-3244913	CSMD1,	0	0
cg00246768	NA	0	0	0	0	0	NA	0	0	0	NA	0	0	NA	NA	0	0	0	NA	NA	0	0	0	0	0	0	0	NA	0	0	1	NA	NA	1	chr8	3245147	3245148	chr8:3245147-3245148	CSMD1,	0	0
cg00552087	NA	0	0	0	0	0	NA	0	0	0	NA	0	0	NA	NA	1	0	0	NA	NA	0	0	0	0	0	0	0	NA	0	0	0	NA	NA	1	chr8	3316893	3316894	chr8:3316893-3316894	CSMD1,	0	0
cg22901249	NA	0	0	0	0	0	NA	0	0	0	NA	0	0	NA	NA	1	0	0	NA	NA	0	0	0	0	0	1	0	NA	0	0	0	NA	NA	2	chr8	5762990	5762991	chr8:5762990-5762991	,	0	0
cg10061374	NA	0	0	0	0	0	NA	0	0	0	NA	0	0	NA	NA	1	0	0	NA	NA	0	0	0	0	0	0	0	NA	0	0	0	NA	NA	1	chr8	5909945	5909946	chr8:5909945-5909946	,	0	0
cg01029926	NA	0	0	0	0	0	NA	0	0	0	NA	0	0	NA	NA	0	0	0	NA	NA	0	1	0	0	0	0	0	NA	0	0	0	NA	NA	1	chr8	18257451	18257452	chr8:18257451-18257452	NAT2,	0	0
cg22321646	NA	0	0	0	0	0	NA	0	0	0	NA	0	0	NA	NA	0	0	0	NA	NA	0	0	0	0	0	1	0	NA	0	0	0	NA	NA	1	chr8	20110814	20110815	chr8:20110814-20110815	LZTS1,	0	0
cg02128053	NA	1	0	0	0	0	NA	0	0	0	NA	0	0	NA	NA	0	0	0	NA	NA	0	0	0	0	0	0	0	NA	0	0	0	NA	NA	1	chr8	27779656	27779657	chr8:27779656-27779657	SCARA5,	0	0
cg06544308	NA	0	0	0	0	0	NA	0	0	0	NA	0	0	NA	NA	0	0	0	NA	NA	0	0	0	0	0	1	0	NA	0	0	0	NA	NA	1	chr8	39441975	39441976	chr8:39441975-39441976	ADAM18, LOC100130964,	0	1
cg13274978	NA	0	0	0	0	0	NA	0	0	0	NA	0	0	NA	NA	1	0	0	NA	NA	0	0	0	0	0	0	0	NA	0	0	0	NA	NA	1	chr8	52320849	52320850	chr8:52320849-52320850	PXDNL,	0	0
cg01558721	NA	0	0	0	0	0	NA	0	0	0	NA	0	0	NA	NA	1	0	0	NA	NA	0	0	0	0	0	0	0	NA	0	0	0	NA	NA	1	chr8	56362648	56362649	chr8:56362648-56362649	SBF1P1, XKR4,	0	1
cg07244523	NA	1	0	0	0	0	NA	0	0	0	NA	0	0	NA	NA	1	0	0	NA	NA	0	0	0	0	0	0	0	NA	0	0	0	NA	NA	2	chr8	56368090	56368091	chr8:56368090-56368091	XKR4,	0	0
cg01525428	NA	0	0	0	0	0	NA	0	0	0	NA	0	0	NA	NA	1	0	0	NA	NA	0	0	0	0	0	0	0	NA	0	0	0	NA	NA	1	chr8	56436771	56436772	chr8:56436771-56436772	XKR4,	0	0
cg21287347	NA	1	0	0	0	0	NA	0	0	0	NA	0	0	NA	NA	0	0	0	NA	NA	0	0	0	0	0	0	0	NA	0	0	0	NA	NA	1	chr8	59259110	59259111	chr8:59259110-59259111	,	0	0
cg09433131	NA	0	0	0	0	0	NA	0	0	0	NA	0	0	NA	NA	1	0	0	NA	NA	0	0	0	0	0	0	0	NA	0	0	0	NA	NA	1	chr8	73480179	73480180	chr8:73480179-73480180	KCNB2,	0	0
cg20100668	NA	0	0	0	0	0	NA	0	0	0	NA	0	0	NA	NA	1	0	0	NA	NA	0	0	0	0	0	0	0	NA	0	0	0	NA	NA	1	chr8	88885469	88885470	chr8:88885469-88885470	DCAF4L2,	0	0
cg06339135	NA	0	0	0	0	0	NA	0	0	0	NA	0	0	NA	NA	1	0	0	NA	NA	0	0	0	0	0	0	0	NA	0	0	0	NA	NA	1	chr8	107227990	107227991	chr8:107227990-107227991	,	0	0
cg26687497	NA	0	0	0	0	0	NA	0	0	0	NA	0	0	NA	NA	1	0	0	NA	NA	0	0	0	0	0	0	0	NA	0	0	0	NA	NA	1	chr8	118147534	118147535	chr8:118147534-118147535	SLC30A8,	0	0
cg01084257	NA	0	0	0	0	0	NA	0	0	0	NA	0	0	NA	NA	0	0	0	NA	NA	0	1	0	0	0	0	0	NA	0	0	0	NA	NA	1	chr8	129020419	129020420	chr8:129020419-129020420	PVT1,	0	1
cg00905417	NA	0	0	0	0	0	NA	0	0	0	NA	0	0	NA	NA	1	0	0	NA	NA	0	0	0	0	0	0	0	NA	0	0	0	NA	NA	1	chr8	133141673	133141674	chr8:133141673-133141674	KCNQ3,	0	0
cg10830322	NA	0	0	0	0	0	NA	0	0	0	NA	0	0	NA	NA	1	0	0	NA	NA	0	0	0	0	0	0	0	NA	0	0	0	NA	NA	1	chr8	133573364	133573365	chr8:133573364-133573365	HPYR1,	0	1
cg05307234	NA	0	0	0	0	0	NA	0	0	0	NA	0	0	NA	NA	0	0	0	NA	NA	0	0	0	1	0	0	0	NA	0	0	0	NA	NA	1	chr8	133786975	133786976	chr8:133786975-133786976	PHF20L1,	0	0
cg25053164	NA	1	0	0	0	0	NA	0	0	0	NA	0	0	NA	NA	1	0	0	NA	NA	0	0	0	0	0	0	0	NA	0	0	0	NA	NA	2	chr8	136245226	136245227	chr8:136245226-136245227	LINC01591,	0	1
cg06276653	NA	1	0	0	0	0	NA	0	0	0	NA	0	0	NA	NA	0	0	0	NA	NA	0	0	0	0	0	0	0	NA	0	0	0	NA	NA	1	chr8	139164635	139164636	chr8:139164635-139164636	FAM135B,	0	0
cg00111503	NA	0	0	0	0	0	NA	0	0	0	NA	0	0	NA	NA	1	0	0	NA	NA	0	0	0	0	0	0	0	NA	0	0	0	NA	NA	1	chr8	140631116	140631117	chr8:140631116-140631117	KCNK9,	0	1
cg01659279	NA	0	0	0	0	0	NA	0	0	0	NA	0	0	NA	NA	0	0	0	NA	NA	0	1	0	0	0	0	0	NA	0	0	0	NA	NA	1	chr8	140802195	140802196	chr8:140802195-140802196	TRAPPC9,	0	0
cg25071674	NA	0	0	0	0	0	NA	0	0	0	NA	0	0	NA	NA	0	0	0	NA	NA	0	1	0	0	0	0	0	NA	0	0	0	NA	NA	1	chr8	141595345	141595346	chr8:141595345-141595346	AGO2,	0	0
cg17159698	NA	1	0	0	0	0	NA	0	0	0	NA	0	0	NA	NA	1	0	0	NA	NA	0	0	0	0	0	0	0	NA	0	0	0	NA	NA	2	chr8	142842030	142842031	chr8:142842030-142842031	,	0	0
cg08957001	NA	1	1	0	0	0	NA	0	0	0	NA	0	0	NA	NA	1	0	0	NA	NA	0	0	0	0	0	0	0	NA	0	0	0	NA	NA	3	chr8	143333654	143333655	chr8:143333654-143333655	TSNARE1,	0	0
cg21225501	NA	0	0	0	0	0	NA	0	0	0	NA	0	0	NA	NA	1	0	0	NA	NA	0	0	0	0	0	0	0	NA	0	0	0	NA	NA	1	chr8	143719601	143719602	chr8:143719601-143719602	LOC101928087,	1	1
cg10802543	NA	0	0	1	0	0	NA	0	0	0	NA	0	0	NA	NA	0	0	0	NA	NA	0	0	0	0	0	0	0	NA	0	0	0	NA	NA	1	chr8	143782585	143782586	chr8:143782585-143782586	LY6K,	1	0
cg22989161	NA	0	0	0	0	0	NA	0	0	0	NA	0	0	NA	NA	0	0	0	NA	NA	0	1	0	0	0	0	0	NA	0	0	0	NA	NA	1	chr8	145531953	145531954	chr8:145531953-145531954	HSF1,	0	0
cg13411507	NA	0	0	0	0	0	NA	0	0	0	NA	0	0	NA	NA	0	0	0	NA	NA	0	0	0	0	0	1	0	NA	0	0	0	NA	NA	1	chr9	5890900	5890901	chr9:5890900-5890901	MLANA,	0	0
cg14614296	NA	0	0	0	0	0	NA	0	0	0	NA	0	0	NA	NA	0	0	0	NA	NA	0	0	0	0	0	1	0	NA	0	0	0	NA	NA	1	chr9	121929512	121929513	chr9:121929512-121929513	BRINP1,	0	0
cg14301000	NA	0	0	0	0	0	NA	0	0	0	NA	0	0	NA	NA	0	0	0	NA	NA	0	1	0	0	0	0	0	NA	0	0	0	NA	NA	1	chr9	136501772	136501773	chr9:136501772-136501773	DBH,	0	0
cg13639452	NA	0	0	0	0	0	NA	0	0	0	NA	0	0	NA	NA	1	0	0	NA	NA	0	0	0	0	0	0	0	NA	0	0	0	NA	NA	1	chr9	137623830	137623831	chr9:137623830-137623831	COL5A1,	0	0
cg14350693	NA	0	0	0	0	0	NA	0	0	0	NA	0	0	NA	NA	1	0	0	NA	NA	0	0	0	0	0	0	0	NA	0	0	0	NA	NA	1	chr9	137710161	137710162	chr9:137710161-137710162	COL5A1,	0	0
cg14581018	NA	0	0	0	0	0	NA	0	0	0	NA	0	0	NA	NA	1	0	0	NA	NA	0	0	0	0	0	0	0	NA	0	0	0	NA	NA	1	chr9	137730343	137730344	chr9:137730343-137730344	COL5A1, LOC101448202,	0	1
cg14239111	NA	1	0	0	0	0	NA	0	0	1	NA	0	0	NA	NA	0	0	1	NA	NA	0	0	0	0	0	0	0	NA	0	0	1	NA	NA	4	chr9	138660998	138660999	chr9:138660998-138660999	KCNT1,	0	0
cg14178775	NA	0	0	0	0	0	NA	0	0	0	NA	0	0	NA	NA	0	0	0	NA	NA	0	1	0	0	0	0	0	NA	0	0	0	NA	NA	1	chr9	139401589	139401590	chr9:139401589-139401590	NOTCH1,	0	0
cg24156054	NA	0	0	0	0	0	NA	0	0	0	NA	0	0	NA	NA	0	0	0	NA	NA	0	0	0	0	0	1	0	NA	0	0	0	NA	NA	1	chrX	3235730	3235731	chrX:3235730-3235731	MXRA5,	0	0
cg04702368	NA	0	0	0	0	0	NA	0	0	0	NA	0	0	NA	NA	0	0	0	NA	NA	0	0	0	0	0	1	0	NA	0	0	0	NA	NA	1	chrX	9732788	9732789	chrX:9732788-9732789	GPR143,	0	0
cg02939216	NA	0	0	0	0	0	NA	0	0	0	NA	0	0	NA	NA	1	0	0	NA	NA	0	0	0	0	0	0	0	NA	0	0	0	NA	NA	1	chrX	22290484	22290485	chrX:22290484-22290485	PTCHD1-AS,	0	1
cg25440309	NA	0	0	0	0	0	NA	0	0	0	NA	0	0	NA	NA	1	0	0	NA	NA	0	0	0	0	0	0	0	NA	0	0	0	NA	NA	1	chrX	79828776	79828777	chrX:79828776-79828777	,	0	0
cg08214957	NA	0	0	0	0	0	NA	0	0	0	NA	0	0	NA	NA	1	0	0	NA	NA	0	0	0	0	0	1	0	NA	0	0	0	NA	NA	2	chrX	139866495	139866496	chrX:139866495-139866496	CDR1,	0	0
cg05175213	NA	0	0	0	0	0	NA	0	0	0	NA	0	1	NA	NA	0	0	0	NA	NA	0	0	0	0	0	0	0	NA	0	0	0	NA	NA	1	chrX	145077477	145077478	chrX:145077477-145077478	MIR888, MIR890, MIR892A, MIR892B, MIR892C,	0	1
cg06878303	NA	0	0	0	0	0	NA	0	0	0	NA	0	0	NA	NA	0	0	0	NA	NA	0	0	0	0	0	1	0	NA	0	0	0	NA	NA	1	chrX	151903174	151903175	chrX:151903174-151903175	MAGEA12,	0	0
